# Supplementary material for: Characterizing the Escherichia coli O157:H7 Proteome Including Protein Associations with Higher Order Assemblies
Source: PLoS One. 2011 Nov 7;6(11):e26554. doi: 10.1371/journal.pone.0026554 (PMC3210124; doi:10.1371/journal.pone.0026554)
Supplement: Table S4 — Shotgun proteomics analysis of STEC strain 86-24 using the modified spectral counting method APEX comparing protein profiles in four lysate fractions. Worksheet A: F1-sSEC samples, proteins identified in the 13 SCX fractions (F1–13) derived from the first size exclusion chromatography fraction of the soluble cell lysate. Worksheet B: F2-sSEC samples, proteins identified in the 13 SCX fractions (F14–26) derived from the second size exclusion chromatography fraction of the soluble cell lysate. Worksheet C: F3-sSEC samples, proteins identified in the 13 SCX fractions (F27–39) derived from the third size exclusion chromatography fraction of the soluble cell lysate. Worksheet D: F4-p samples, proteins identified in the 13 SCX fractions (F40–52) derived from the insoluble cell lysate fraction. General descriptions for all worksheets: Column A: GenBank accession number in NCBI - Escherichia coli O157:H7 EDL933 protein sequence database (chromosome and pO157 plasmid). Column B: Swiss-Prot accession number - Escherichia coli O157:H7 EDL933 protein sequence database (chromosome and pO157 plasmid). Column C: Ref Seq. accession number - Escherichia coli O157:H7 EDL933 protein sequence database (chromosome and pO157 plasmid). Column D: Locus tag - Escherichia coli O157:H7 EDL933 protein sequence database (chromosome and pO157 plasmid). Column E: Gene name - Escherichia coli O157:H7 EDL933 protein sequence database (chromosome and pO157 plasmid). Column F: Subcellular localization of proteins derived from assignments of a combination of algorithms to predict subcellular localizations - PSORTb (http://www.psort.org/psortb/), Cell PLoc (Chou & Shen, Nature Protocols 3, p. 153–162; 2008), the Ecocyc database (http://ecocyc.org/) and SwissProt; Protein complex assignments in homooligomeric complexes (e.g. ‘Ho-2’) or heterooligomeric complexes (e.g. ‘Ht-7’, if subunit score unknown ‘Ht-Mu’) were made from data in Ecocyc and Swiss-Prot, if available. Abbr.: CY, cytoplasmic; IM, inner m [file pone.0026554.s006.xls]

## Sheet: A - F1-s(SEC)
Table S4. Shotgun proteomics analysis of STEC strain 86-24 using the modified spectral counting method APEX comparing protein profiles in four lysate fractions.
Worksheet A: Proteomics analysis of STEC cell lysates limited to the protein subset isolated in fraction F1-sSEC.
The spectral counting method APEX was used for protein quantification. Database searches were performed combining spectra from LC-MS/MS fractions (F1-13) representing F1-sSEC from the size exclusion chromatography step. This table includes protein quantities from 12 experimental replicates and protein annotation data parsed from several bioinformatics databases. Searches for spectral-peptide matc…
gi| Acession No.	Swissprot No.	Ref Seq No.	Locus tag	Gene name	Subcell. localization, multiprotein complex	Protein description	Protein abundance ranking (APEXi)	M.W.	APEXi abundances of 12 experimental replicates												APEXi average (out of 2.5 x 106)	Subcellular loca- lization, PSortB	Subcellular loca- lization, Cell-PLoc	Sequence Length	CELLO	PASUB	SubcellPredict	SLPLocal	SubLocv1	SosuiGramN	DTTSS	Main functional role	Sub functional role
									2DLCEC8624090924	2DLCEC8624091202	2DLCEC8624091229	2DLCEC8624100222	2DLCEC8624100706	2DLCEC8624090930	2DLCEC8624100106	2DLCEC8624100510	2DLCEC8624100504	2DLCEC8624091103	2DLCEC8624091028	2DLCEC8624100714
15802089	P69778	NP_288111.1	Z2705	lpp	L-OM, Ht-Mu	murein lipoprotein [Escherichia coli O157:H7 EDL933]	1 / 3 / 43 / 4	8323.12	248284	308476	301228	222940	301345	301759	212701	381025	69105.2	88674.6	34685.7	123843	216172	Outer Membrane	Outer membrane	78	Extracellular	Periplasmic	Periplasmic	Periplasmic	Periplasmic	-	-	Cell envelope	Other
15802768	Q8XE41	NP_288795.1	Z3473	ompC	bb-OM	outer membrane porin protein C [Escherichia coli O157:H7 EDL933]	2 / 66 / 282 / 5	40506.7	85448.5	168059	181058	124024	132955	148805	78815.4	155782	52835.4	52700.8	26164.3	64673.7	105943	Outer Membrane	Outer membrane	367	Outer Membrane	Extracellular	Extracellular	Extracellular	Outer Membrane	-	-	Cell envelope	Other
15800816	P0A911	NP_286832.1	Z1307	ompA	bb-OM	outer membrane protein A [Escherichia coli O157:H7 EDL933]	3 / 58 / 50 / 8	37199.2	65009.1	127145	126120	114956	88984.1	148724	49635.2	134608	30515.7	31338.5	20923.7	41157.6	81593.1	Outer Membrane	Outer membrane	346	Outer Membrane	Periplasmic	Periplasmic	Periplasmic	Periplasmic	-	-	Cell envelope	Other
15802314	P0A9A0	NP_288340.1	Z2960	ftn	CY, Ho-24	ferritin [Escherichia coli O157:H7 EDL933]	4 / 59 / 79 / 191	19423.1	71802.2	18887.8	15569.9	64313.4	64772.8	44319.8	96060.4	34718.4	89805.8	62683.2	99951	50981	59488.8	Cytoplasmic	Cytoplasm	165	Cytoplasmic	Cytoplasmic	Cytoplasmic	Cytoplasmic	Cytoplasmic	-	-	Transport and binding proteins	Cations and iron carrying compounds
15804515	P0A6F4	NP_290555.1	Z5471	glpK	CY, Ho-4	glycerol kinase [Escherichia coli O157:H7 EDL933]	5 / 19 / 98 / 2	56974.4	81711.3	33728	36233.2	57325.9	104882	55801.6	49989.4	47402.3	42543.7	61066.7	44944.7	57376.5	56083.8	Cytoplasmic	Cytoplasm	502	Cytoplasmic	Cytoplasmic	Cytoplasmic	Cytoplasmic	Cytoplasmic	-	-	Energy metabolism	Other
15800424	Q8X9B0	NP_286436.1	Z0873	gltA	CY, Ho-6	type II citrate synthase [Escherichia coli O157:H7 EDL933]	6 / 9 / 176 / 99	47970.78*	109560	14977.7	13438.6	42821.6	78617.9	24787.8	69607.8	17604.9	70772.1	71606.2	73944.6	51702.6	53286.8	Cytoplasmic	Cytoplasm	427	Unknown	X	Cytoplasmic	Cytoplasmic	Cytoplasmic	-	-	Energy metabolism	TCA cycle
15804735	P0A6F7	NP_290776.1	Z5748	groEL	CY, Ho-14	chaperonin GroEL [Escherichia coli O157:H7 EDL933]	7 / 10 / 155 / 127	57317.18*	38144.4	50790.4	51051.4	79861.9	53095.1	28071.1	46952.7	31466.9	78376.8	52723.9	56333.5	57531.7	52033.3	Cytoplasmic	Cytoplasm	548	Cytoplasmic	X	Cytoplasmic	Cytoplasmic	Cytoplasmic	-	-	Protein fate	Protein folding and stabilization
15800426	Q8X9A9	NP_286438.1	Z0876	sdhD	IM, Ht-4	succinate dehydrogenase cytochrome b556 small membrane subunit [Escherichia coli O157:H7 EDL933]	8 / 294 / - / 446	12823.1	18239.3	76966.6	126893	81684.9	53988.7	19701.8	60548.3	21422.7	17355.7	39338.9	13946	29366.2	46621	Cytoplasmic Membrane	Inner membrane	115	Inner Membrane	Cytoplasmic	Cytoplasmic	Cytoplasmic	Inner Membrane	-	-	Energy metabolism	TCA cycle
15800431	P0AFG7	NP_286443.1	Z0881	sucB	CY, Ho-24	dihydrolipoamide acetyltransferase [Escherichia coli O157:H7 EDL933]	9 / 52 / 178 / 87	44009.5	36151.5	71742.4	81784.5	47182.3	63107.8	30939.8	33282.3	30394.3	37049.9	34737.6	33871.9	40952.2	45099.7	Cytoplasmic	Inner membrane	405	Unknown	Cytoplasmic	Cytoplasmic	Cytoplasmic	Cytoplasmic	-	-	Energy metabolism	TCA cycle
15802055	P0A906	NP_288077.1	Z2655	slyB	L-OM	outer membrane lipoprotein [Escherichia coli O157:H7 EDL933]	10 / 202 / 655 / 85	15601.1	28634.3	65908.1	66403.9	18742.6	35786.7	38353.5	9005.3	52497.4	16349.9	10293.2	15501	21083.9	31546.6	Outer Membrane	Outer membrane	155	Outer Membrane	Extracellular	Extracellular	Extracellular	Periplasmic	-	-	Cell envelope	Other
15804539	Q7A978	NP_290579.1	Z5497	katG	CY, Ho-4	catalase; hydroperoxidase HPI(I) [Escherichia coli O157:H7 EDL933]	11 / 39 / 387 / 161	80098.23*	20466.9	18226.7	20033.2	31225.2	32454.8	8053.62	64877.9	9965.03	58895.6	31399.6	39287.6	34984.2	30822.5	Cytoplasmic	Periplasm	726	periplasm	X	Cytoplasmic	Cytoplasmic	Cytoplasmic	-	-	Cellular processes	Detoxification
15800566	P0A919	NP_286578.1	Z1036	ompX	bb-OM	outer membrane protein X [Escherichia coli O157:H7 EDL933]	12 / 324 / - / 16	18601.8	12985.8	46969.4	57100.1	63269.6	26845.7	49695.7	18799.1	34011.1	9415.54	17338.2	11477.2	18781.8	30557.4	Outer Membrane	Outer membrane	171	Outer Membrane	Extracellular	Extracellular	Extracellular	Outer Membrane	-	-	Mobile and extrachromosomal element functions	Prophage functions
15804731	Q8XDS0	NP_290772.1	Z5744	aspA	CY, Ho-4	aspartate ammonia-lyase [Escherichia coli O157:H7 EDL933]	13 / 13 / 455 / 140	54062.4	30527.7	5034.65	7699.01	5307.55	56300.6	8629.11	81950.5	9656.72	53216.1	7179.11	55601.6	9190.79	27524.5	Cytoplasmic	Cytoplasm	478	Cytoplasmic	Cytoplasmic	Cytoplasmic	Cytoplasmic	Cytoplasmic	-	-	Energy metabolism	Amino acids and amines
15800432	P0A838	NP_286444.1	Z0882	sucC	CY, Ht-4	succinyl-CoA synthetase subunit beta [Escherichia coli O157:H7 EDL933]	14 / 18 / 39 / 71	41391.1	16431.3	10567.4	13448.7	27970	29245.7	12737.4	32254.9	13176.7	37405.7	28664.1	41485.1	40254.6	25303.5	Cytoplasmic	Cytoplasm	388	Cytoplasmic	Cytoplasmic	Cytoplasmic	Cytoplasmic	Unknown	-	-	Energy metabolism	TCA cycle
15800430	P0AFG5	NP_286442.1	Z0880	kgd (sucA)	CY, Ho-12	alpha-ketoglutarate decarboxylase [Escherichia coli O157:H7 EDL933]	15 / 72 / 225 / 36	105063.39*	14734.4	12449.6	13526.3	35724.9	19629.4	11443.3	34803	11398.2	32895.5	39422.6	31732.6	39826.2	24798.8	Cytoplasmic	Cytoplasm	933	Cytoplasmic	X	Cytoplasmic	Cytoplasmic	Cytoplasmic	-	-	Energy metabolism	TCA cycle
15803852	P0A6N3	NP_289886.1	Z4697	tuf	CY, Ho-Mu	elongation factor Tu [Escherichia coli O157:H7 EDL933]	16 / 24 / 14 / 1	43281.9	17344.9	16691	13387.1	13368.5	18950.8	12194.1	11711	14372.8	40286.4	54529.5	41377.8	39234	24454	Cytoplasmic	Cytoplasm	394	Cytoplasmic	Cytoplasmic	Cytoplasmic	Cytoplasmic	Cytoplasmic	-	-	Protein synthesis	Translation factors
161367576	Q8X7H3	NP_288599.2	Z3260	fbaB	CY, Ho-10	fructose-bisphosphate aldolase [Escherichia coli O157:H7 EDL933]	17 / 41 / 766 / 386	38107.7	34295.4	14057.5	17035.6	10034.5	49444.2	8119.53	48264.8	6183.84	45304.6	11821.5	29065.7	12972.1	23883.3	Unknown	Cytoplasm	374	Cytoplasmic	Cytoplasmic	Cytoplasmic	Cytoplasmic	Cytoplasmic	-	-	Unknown function	General
15804337	P68701	NP_290376.1	Z5235	atpE	IM, Ht-13	F0F1 ATP synthase subunit C [Escherichia coli O157:H7 EDL933]	18 / 219 / - / 453	8255.83	23939.1	18367	6694.17	54980.2	31493.4	17237.4	27881.3	15004.9	25312.9	17210.8	18361.5	22033.4	23209.7	Cytoplasmic Membrane	Inner membrane	79	Inner Membrane	Cytoplasmic	Cytoplasmic	Cytoplasmic	Inner Membrane	-	-	Energy metabolism	ATP-proton motive force interconversion
15804761	P0A6X5	NP_290802.1	Z5779	hfq	CY, Ho-6, degradosome	RNA-binding protein Hfq [Escherichia coli O157:H7 EDL933]	19 / 75 / 275 / 400	11166	14421.8	2766.24	0	0	23716	21809.4	3742.59	20338.9	68622.4	38881.5	30671	49776.6	22895.5	Cytoplasmic	Cytoplasm	102	Cytoplasmic	Periplasmic	Cytoplasmic	Periplasmic	Cytoplasmic	-	-	Mobile and extrachromosomal element functions	Prophage functions
15800457	P0A913	NP_286469.1	Z0909	pal	L-OM, Ht-7	peptidoglycan-associated outer membrane lipoprotein [Escherichia coli O157:H7 EDL933]	20 / 258 / 595 / 121	18823.4	13873.8	37847.2	42248.4	29208.3	15209.9	31304.6	16160.1	26088.1	8801.99	16624	11921.5	21991.7	22606.6	Outer Membrane	Outer membrane	173	Outer Membrane	Extracellular	Periplasmic	Extracellular	Outer Membrane	-	-	Cell envelope	Other
15801482	Q8XCB6	NP_287499.1	Z2034	yciD (ompW)	bb-OM	outer membrane protein W [Escherichia coli O157:H7 EDL933]	21 / 451 / - / 17	22922	15415.3	15375.4	10399.6	56292.3	14195.9	17317.4	16160.1	14493.4	5867.99	36572.9	9537.17	38308.2	20828	Outer Membrane	Outer membrane	212	Outer Membrane	Extracellular	Extracellular	Extracellular	Outer Membrane	-	-	Cell envelope	Other
15801391	P58603	NP_287408.1	Z1931	ompT	bb-OM, Ho-7	outer membrane protease [Escherichia coli O157:H7 EDL933]	22 / 212 / 991 / 225	35591.9	13354.1	31668.7	42997.6	36803.8	21294.7	31822	11595.3	36905.2	8215.51	5818.64	4381.31	4469.46	20777.2	Outer Membrane	Outer membrane	317	Outer Membrane	Extracellular	Extracellular	Extracellular	Outer Membrane	-	-	Cell envelope	Other
15804736	Q8XDR0	NP_290777.1	Z5749	yjeI	L (IM or OM)	uncharacterized protein YjeI [Escherichia coli O157:H7 EDL933]	23 / 138 / 494 / 433	13064.2	17987.4	43702	48033.6	8262.23	11667.3	20725	23046.7	28186	7607.86	6453.64	13910.6	16555.5	20511.5	Unknown	Periplasm	128	Unknown	Extracellular	Extracellular	Extracellular	Extracellular	-	-	Hypothetical proteins	Conserved
15804332	P0ABB6	NP_290371.1	Z5230	atpD	CY/IM, Ht-9	F0F1 ATP synthase subunit beta [Escherichia coli O157:H7 EDL933]	24 / 25 / 139 / 60	50323.5	20192	12351.8	6903.09	24816.6	31948.5	14383.5	23837.3	14879.7	25274.7	20402	20680	26621.3	20190.9	Cytoplasmic Membrane	Inner membrane	460	Inner Membrane	Cytoplasmic	Cytoplasmic	Cytoplasmic	Cytoplasmic	-	-	Energy metabolism	ATP-proton motive force interconversion
15804576	P0A7K4	NP_290617.1	Z5559	rplL	CY, Ht-3, 50S Rib	50S ribosomal protein L7/L12 [Escherichia coli O157:H7 EDL933]	25 / 12 / 60 / 65	12294.6	14907.1	38887	34570.1	16947.2	12747.3	16102.4	25003.7	22424.9	21752.4	5358.66	19598.4	8232.28	19711	Unknown/Multiple Localization	Cytoplasm	121	Unknown	Cytoplasmic	Cytoplasmic	Cytoplasmic	Cytoplasmic	-	-	Protein synthesis	Ribosomal proteins: synthesis and modification
15802985	Q8XBF4	NP_289015.1	Z3719	maeB	CY, Ho-6	malic enzyme [Escherichia coli O157:H7 EDL933]	26 / 111 / 802 / 509	82485.95*	11328.2	31716.1	30502.2	16705.7	20132	11334.9	27223.3	12332.4	23200	11144.8	16599.1	12072.7	18690.9	Cytoplasmic	Cytoplasm	759	Unknown	X	Cytoplasmic	Cytoplasmic	Cytoplasmic	-	-	Unclassified	Role category not yet assigned
15800433	P0AGF1	NP_286445.1	Z0883	sucD	CY, Ht-4	succinyl-CoA synthetase subunit alpha [Escherichia coli O157:H7 EDL933]	27 / 33 / 8 / 24	29776.3	12170.9	1945.42	0	8385.77	8672.95	6573.41	8860.36	5244.71	47616.7	41927.8	40787	36406.7	18216	Cytoplasmic	Cytoplasm	289	Cytoplasmic	Cytoplasmic	Cytoplasmic	Cytoplasmic	Cytoplasmic	-	-	Energy metabolism	TCA cycle
15804517	P0AF38	NP_290557.1	Z5473	zapB (yiiU)	CY, Ho-2, Ht-Mu	putative cell division factor [Escherichia coli O157:H7 EDL933]	28 / 86 / 221 / 445	9634.53	12193.7	33679.8	43187.6	14282.5	12833.3	13698.3	9374.06	11464.4	21661	18409.7	11316	13467.6	17964	Unknown	Nucleoid	81	Cytoplasmic	Cytoplasmic	Cytoplasmic	Cytoplasmic	Cytoplasmic	-	-	Hypothetical proteins	Conserved
15800427	P0AC43	NP_286439.1	Z0877	sdhA	IM, Ht-4	succinate dehydrogenase flavoprotein subunit [Escherichia coli O157:H7 EDL933]	29 / 49 / 31 / 14	64409.09*	5994.03	3311.18	3639.37	13876.4	3154.21	2486.27	6367.4	3832.17	35898.5	37922.2	34858.9	34425.3	15480.5	Cytoplasmic Membrane	Inner membrane	588	periplasm	X	Cytoplasmic	Cytoplasmic	Outer Membrane	-	-	Energy metabolism	TCA cycle
15803933	Q8X6Y5	NP_289969.1	Z4786	glpD	CY/IM, Ho-2	glycerol-3-phosphate dehydrogenase [Escherichia coli O157:H7 EDL933]	30 / 210 / 888 / 3	56736.19*	12938.5	11228.8	17528.8	16806.2	13393.9	10447.6	21049.4	9971.02	11841.9	15554.1	17059.4	19522.1	14778.5	Cytoplasmic	Cytoplasm	501	Cytoplasmic	X	Cytoplasmic	Cytoplasmic	Unknown	-	-	Energy metabolism	Aerobic
15803767	P0ADW5	NP_289801.1	Z4592	yhcB	IM	inner membrane protein YhcB [Escherichia coli O157:H7 EDL933]	31 / 264 / 621 / 278	15238.6	13476.8	16326.2	26916.6	8308.13	15863.3	14097.7	14871.5	19339.7	9000.15	11218.9	12067.9	15015.4	14708.5	Cytoplasmic Membrane	Inner membrane	132	Unknown	Cytoplasmic	Cytoplasmic	Cytoplasmic	Inner Membrane	-	-	Hypothetical proteins	Conserved
15803853	P0A6N0	NP_289887.1	Z4698	fusA	CY, Rib	elongation factor G [Escherichia coli O157:H7 EDL933]	32 / 4 / 127 / 102	77578.2	6891.75	12237.1	11291.3	9225.51	5439.92	3913.6	24632.8	4258	22486.4	23782.8	20709.8	30265.8	14594.6	Cytoplasmic	Cytoplasm	704	Cytoplasmic	Cytoplasmic	Cytoplasmic	Cytoplasmic	Cytoplasmic	-	-	Protein synthesis	Translation factors
15802150	P0ADB2	NP_288172.1	Z2769	osmE	L (IM or OM)	osmotically-inducible lipoprotein E [Escherichia coli O157:H7 EDL933]	33 / 391 / 1040 / 438	12020.2	9865.81	15138.9	48254.2	10876.1	15574.9	8525.51	16547.9	22261.8	4928.24	4255.75	3035.11	10896.5	14180.1	Unknown	Outer membrane	112	Unknown	Periplasmic	Periplasmic	Periplasmic	Periplasmic	-	-	Cell envelope	Other
15802193	P0A9B4	NP_288215.1	Z2818	gapA	CY, Ho-4	glyceraldehyde-3-phosphate dehydrogenase [Escherichia coli O157:H7 EDL933]	34 / 6 / 29 / 129	35531	13447.9	6878.52	7560.29	7721.36	26537.4	9130.77	8727.1	10536.4	20313.8	17264.7	12380.9	25344.2	13820.3	Cytoplasmic	Cytoplasm	331	Cytoplasmic	Cytoplasmic	Cytoplasmic	Cytoplasmic	Unknown	-	-	Energy metabolism	Glycolysis/gluconeogenesis
15804336	P0ABA2	NP_290375.1	Z5234	atpF	IM, Ht-13	F0F1 ATP synthase subunit B [Escherichia coli O157:H7 EDL933]	35 / 556 / 231 / 659	17263.2	14539.1	19521.2	28024.2	15741.7	6147.99	22435.6	6894.97	12205	5929.76	11572.7	8031.3	11948	13582.6	Cytoplasmic Membrane	Inner membrane	156	Inner Membrane	Cytoplasmic	Cytoplasmic	Cytoplasmic	Inner Membrane	-	-	Energy metabolism	ATP-proton motive force interconversion
15803134	Q7ABI1	NP_289166.1	Z3907	grpE	CY, Ht-3	heat shock protein GrpE [Escherichia coli O157:H7 EDL933]	36 / 79 / 707 / 442	21811	11370.4	20840.2	21307.7	8269.44	24099.7	6550.45	18541.8	3563.45	19236.6	7266.32	8793.29	6976.83	13068	Cytoplasmic	Cytoplasm	197	Cytoplasmic	Cytoplasmic	Cytoplasmic	Cytoplasmic	Unknown	-	-	Protein fate	Protein folding and stabilization
15800772	P0AG69	NP_286786.1	Z1257	rpsA	CY, 30S Rib	30S ribosomal protein S1 [Escherichia coli O157:H7 EDL933]	37 / 43 / 262 / 338	61155.7	10171.1	12518.4	9291.93	2189.98	10035.6	8240.02	28137.2	8765.93	22047.4	3960.9	25236.3	4095.64	12057.5	Cytoplasmic	Cytoplasm	557	Cytoplasmic	Cytoplasmic	Cytoplasmic	Cytoplasmic	Cytoplasmic	-	-	Protein synthesis	Ribosomal proteins: synthesis and modification
15804575	P0A7J5	NP_290616.1	Z5558	rplJ	CY, Ht-3, 50S Rib	50S ribosomal protein L10 [Escherichia coli O157:H7 EDL933]	38 / 61 / 171 / 106	17710.8	6529.72	12524.6	5506.41	11247.5	21475.6	22006.3	13690.4	15961.9	9942.4	5163.92	10099.5	5408.93	11629.8	Cytoplasmic	Cytoplasm	165	Cytoplasmic	Cytoplasmic	Cytoplasmic	Cytoplasmic	Cytoplasmic	-	-	Protein synthesis	Ribosomal proteins: synthesis and modification
15804741	P0ADB9	NP_290782.1	Z5754	ecnB	L (IM or OM), Ht-2	entericidin B membrane lipoprotein [Escherichia coli O157:H7 EDL933]	39 / 271 / 919 / 227	4809.33	10043.2	23153.8	34105.6	4624.79	4372.22	11600.8	9419.81	12662.3	4224.29	7247.33	5192.53	9306.05	11329.4	Cytoplasmic Membrane	Outer membrane	48	periplasm	Extracellular	Extracellular	Cytoplasmic	Unknown	-	-	Unclassified	Role category not yet assigned
15800428	Q8X9A8	NP_286440.1	Z0878	sdhB	IM, Ht-4	succinate dehydrogenase iron-sulfur subunit [Escherichia coli O157:H7 EDL933]	40 / 64 / 37 / 26	26782.9	14754	5659.93	5875.31	14401.2	11861.6	7791.44	14034.7	8862.42	13000.6	13259	9508.35	16220	11269	Cytoplasmic Membrane	Inner membrane	238	Inner Membrane	Cytoplasmic	Cytoplasmic	Periplasmic	Cytoplasmic	-	-	Energy metabolism	TCA cycle
15800450	P0ABK4	NP_286462.1	Z0901	cydB	IM, Ht-2	cytochrome d terminal oxidase polypeptide subunit II [Escherichia coli O157:H7 EDL933]	41 / 379 / - / 622	42451.6	14063.6	26975.3	22730.9	6459.88	9250.76	18229.5	4914.34	11018.7	4461.19	4212.86	5438.04	5393.36	11095.7	Cytoplasmic Membrane	Inner membrane	379	Inner Membrane	Cytoplasmic	Cytoplasmic	Cytoplasmic	Inner Membrane	-	-	Energy metabolism	Electron transport
15800449	Q8X979	NP_286461.1	Z0900	cydA	IM, Ht-2	cytochrome d terminal oxidase, polypeptide subunit I [Escherichia coli O157:H7 EDL933]	42 / 305 / 964 / 372	58334.1	13087.3	10041.1	7640.53	11791.7	15230.6	16094.1	9849.96	15144.1	7664.32	7599.56	7006.9	10655.6	10983.8	Cytoplasmic Membrane	Inner membrane	523	Inner Membrane	Cytoplasmic	Cytoplasmic	Cytoplasmic	Inner Membrane	-	-	Energy metabolism	Electron transport
15800134	P0ADZ9	NP_286146.1	Z0506	yajC	IM, Ht-9	preprotein translocase subunit YajC [Escherichia coli O157:H7 EDL933]	43 / 600 / - / 349	11886.7	9436.86	28961.3	17242.3	15171.4	6207.39	19028	5495.99	13308.7	0	5653.78	1956.84	4342.82	10567.1	Cytoplasmic Membrane	Inner membrane	110	Unknown	Cytoplasmic	Cytoplasmic	Cytoplasmic	Inner Membrane	-	-	Protein fate	Protein and peptide secretion and trafficking
15799879	Q8X8V9	NP_285891.1	Z0209	metQ	L-IM, Ht-4	D-methionine-binding lipoprotein metQ [Escherichia coli O157:H7 EDL933]	44 / 280 / 343 / 455	29415.5	7686.51	10689	11748.5	12909	14536.1	8302.84	8393.61	11291.9	9143.57	8634.59	8916.56	13707.1	10496.6	Cytoplasmic Membrane	Inner membrane	271	periplasm	Periplasmic	Periplasmic	Periplasmic	Periplasmic	-	-	Energy metabolism	Electron transport
15804516	P0AER2	NP_290556.1	Z5472	glpF	IM, Ho-4	facilitated diffusion of glycerol [Escherichia coli O157:H7 EDL933]	45 / 357 / - / 465	29778.9	6782.74	7716.22	32888.8	7009.28	13384.7	10257.3	9480.58	6377.09	8606.39	4876.38	5244.92	9364.22	10165.7	Cytoplasmic Membrane	Inner membrane	281	Inner Membrane	Cytoplasmic	Cytoplasmic	Cytoplasmic	Inner Membrane	-	-	Transport and binding proteins	Other
15799694	P0A6Z0	NP_285706.1	Z0014	dnaK	CY, Ht-3	molecular chaperone DnaK [Escherichia coli O157:H7 EDL933]	46 / 22 / 251 / 268	69112.1	11314.6	7319.28	8793.08	5350.04	12696.1	3930.16	20931.6	5214.66	14778.9	6858.5	14583.6	7759.38	9960.82	Cytoplasmic	Cytoplasm	638	Cytoplasmic	Cytoplasmic	Cytoplasmic	Cytoplasmic	Cytoplasmic	-	-	Protein fate	Protein folding and stabilization
15799799	Q8X966	NP_285811.1	Z0125	aceF	CY, Ho-24	dihydrolipoamide acetyltransferase [Escherichia coli O157:H7 EDL933]	47 / 172 / 545 / 429	66181.2	7318.41	11651.1	12034.4	16639.9	8665.05	9802.48	6649.05	9805.02	7428.86	9470.69	7640.6	11956.1	9921.81	Cytoplasmic	Inner membrane	630	Unknown	Cytoplasmic	Cytoplasmic	Cytoplasmic	Cytoplasmic	-	-	Energy metabolism	Pyruvate dehydrogenase
15799800	P0A9P2	NP_285812.1	Z0126	lpdA	CY, Ht-Mu	dihydrolipoamide dehydrogenase [Escherichia coli O157:H7 EDL933]	48 / 21 / 47 / 246	50686.6	12062.3	3084.89	3082.4	14733	14666.5	8528.38	10984.6	6014.1	15305.4	7489.49	15547.3	7401.38	9908.31	Cytoplasmic	Cytoplasm	474	Cytoplasmic	Cytoplasmic	Cytoplasmic	Cytoplasmic	Cytoplasmic	-	-	Energy metabolism	Pyruvate dehydrogenase
15800322	Q8XBT3	NP_286334.1	Z0751	uspG (ybdQ)	CY, Ho-2	universal stress protein UP12 [Escherichia coli O157:H7 EDL933]	49 / 78 / 69 / 25	15935.6	1250.72	2146.12	0	1957.22	0	428.15	1985.46	1114.09	25233.4	27573.3	30758.6	18303.5	9229.21	Cytoplasmic	Cytoplasm	142	Unknown	Cytoplasmic	Cytoplasmic	Cytoplasmic	Cytoplasmic	-	-	Unknown function	General
15803830	P0A7W3	NP_289864.1	Z4673	rpsE	CY, 30S Rib	30S ribosomal protein S5 [Escherichia coli O157:H7 EDL933]	50 / 191 / 183 / 7	17602.7	12919.5	9912.37	3845.23	6283.46	11997.5	8537.45	4780.13	7145.2	14464.5	6010.11	12929.9	9093.17	8993.21	Cytoplasmic	Cytoplasm	167	Cytoplasmic	Cytoplasmic	Cytoplasmic	Cytoplasmic	Cytoplasmic	-	-	Protein synthesis	Ribosomal proteins: synthesis and modification
15803825	P0A7T1	NP_289859.1	Z4668	rpsM	CY, 30S Rib	30S ribosomal protein S13 [Escherichia coli O157:H7 EDL933]	51 / 197 / 182 / 19	13098.9	10999	234.095	0	3536.57	16399.3	10138.4	4099.71	11720.1	14886.7	7907.65	11341.5	14172.9	8786.33	Cytoplasmic	Cytoplasm	118	Cytoplasmic	Cytoplasmic	Cytoplasmic	Cytoplasmic	Cytoplasmic	-	-	Protein synthesis	Ribosomal proteins: synthesis and modification
15799878	Q8X8W0	NP_285890.1	Z0208	rcsF	L-OM	regulator in colanic acid synthesis RcsF [Escherichia coli O157:H7 EDL933]	52 / 315 / 903 / 228	14176.9	5027.35	9659.38	18048.5	6072.06	9937.59	8703.54	7038.95	10653.1	7987.37	6335.9	7789.06	8111.31	8780.35	Outer Membrane	Cytoplasm	134	Unknown	Periplasmic	Periplasmic	Periplasmic	Periplasmic	-	-	Cell envelope	Biosynthesis and degradation of surface polysaccharides and lipopolysaccharides
15802114	Q8XEC4	NP_288136.1	Z2731	ppsA	CY, Ho-2	phosphoenolpyruvate synthase [Escherichia coli O157:H7 EDL933]	53 / 65 / 242 / 22	87426.6	11700.8	5168.77	3588.05	9527.68	17958.7	6894.02	10531.5	6000.57	13497.1	5353.21	7952.02	7016.42	8765.74	Cytoplasmic	Inner membrane	792	Cytoplasmic	Cytoplasmic	Cytoplasmic	Cytoplasmic	Cytoplasmic	-	-	Energy metabolism	Glycolysis/gluconeogenesis
15801645	P69911	NP_287662.1	Z2215	gadB	CY/IM, Ho-6	glutamate decarboxylase isozyme [Escherichia coli O157:H7 EDL933]	54 / 48 / 163 / 324	52666.1	3546.73	2176.95	528.492	9530.43	2332.74	3064.89	7931.9	3668.07	34202.4	20399.1	1645.72	14036.9	8588.69	Cytoplasmic	Cytoplasm	466	Unknown	Cytoplasmic	Cytoplasmic	Cytoplasmic	Cytoplasmic	-	-	Central intermediary metabolism	Other
15804577	P0A8V4	NP_290618.1	Z5560	rpoB	CY, Ht-5	DNA-directed RNA polymerase subunit beta [Escherichia coli O157:H7 EDL933]	55 / 230 / 873 / 314	150632.36*	11099.9	6608.65	6589.72	7525.5	11331.7	7673.57	8750.42	7513.97	9013.96	6831.03	11262.4	8663.44	8572.02	Cytoplasmic	Cytoplasm	1342	Cytoplasmic	X	Cytoplasmic	Cytoplasmic	Outer Membrane	-	-	Unclassified	Role category not yet assigned
161367638	Q8XE62	NP_286176.2	Z0537	(yajG)	L (IM or OM)	hypothetical protein Z0537 [Escherichia coli O157:H7 EDL933]	56 / 482 / - / 636	20977.2	8787.36	12641.3	14820.5	4540.88	13005.4	8542.77	14585.5	8261.82	4181.24	3158.79	3397.86	6065.89	8499.11	Unknown	Inner membrane	226	Unknown	Periplasmic	Periplasmic	Periplasmic	Periplasmic	-	-	Unknown function	General
15804601	Q8X608	NP_290642.1	Z5601	aceA	CY, Ho-4	isocitrate lyase [Escherichia coli O157:H7 EDL933]	57 / 42 / 741 / 153	48202.08*	13022.9	832.639	908.211	110.565	13801.1	5314.23	27051.3	6802.23	16065.3	780.221	15666.4	318.034	8389.42	Cytoplasmic	Cytoplasm	439	Cytoplasmic	X	Cytoplasmic	Cytoplasmic	Cytoplasmic	-	-	Energy metabolism	TCA cycle
15801728	Q8X9U1	NP_287746.1	Z2306	aldA	CY, Ho-4	aldehyde dehydrogenase A [Escherichia coli O157:H7 EDL933]	58 / 27 / 649 / 287	52236.7	12113.8	1689.85	1393.01	0	19196.2	0	25013.2	256	18864.1	791.655	18310.6	1012.78	8220.1	Cytoplasmic	Cytoplasm	479	Unknown	Cytoplasmic	Cytoplasmic	Cytoplasmic	Cytoplasmic	-	-	Energy metabolism	Fermentation
15804578	P0A8T8	NP_290619.1	Z5561	rpoC	CY, Ht-5	DNA-directed RNA polymerase subunit beta' [Escherichia coli O157:H7 EDL933]	59 / 413 / 1048 / 303	155154	7808.9	9470.11	7364.01	11049.9	8505.68	8634.58	7922.1	9157.6	6499.08	6459.26	6753.31	7882.82	8125.62	Cytoplasmic	Cytoplasm	1407	Cytoplasmic	Cytoplasmic	Cytoplasmic	Cytoplasmic	Cytoplasmic	-	-	Unclassified	Role category not yet assigned
15802844	Q8XCU8	NP_288871.1	Z3559	pta	CY, Ho-2	phosphate acetyltransferase [Escherichia coli O157:H7 EDL933]	60 / 142 / 862 / 104	77154.9	6371.88	10999.7	11514.2	7526.11	5688.2	1769.86	9860.54	2139.57	13571.3	5889.85	12671.2	8587.52	8049.17	Unknown	Inner membrane	714	Cytoplasmic	Cytoplasmic	Periplasmic	Cytoplasmic	Cytoplasmic	-	-	Energy metabolism	Other
15803822	P0A7Z6	NP_289856.1	Z4665	rpoA	CY, Ht-5	DNA-directed RNA polymerase subunit alpha [Escherichia coli O157:H7 EDL933]	61 / 38 / 96 / 214	36510.4	9844.41	4597.49	1082.71	12091.1	6193.93	5178.18	5384.36	7243.55	13577.4	7692.97	9930.24	13394.2	8017.54	Cytoplasmic	Cytoplasm	329	Cytoplasmic	Cytoplasmic	Cytoplasmic	Cytoplasmic	Cytoplasmic	-	-	Transcription	DNA-dependent RNA polymerase
15800192	P0AE07	NP_286204.1	Z0578	acrA	L-IM, Ht-3	acridine efflux pump [Escherichia coli O157:H7 EDL933]	62 / 409 / 918 / 541	42195	7623.85	13478.9	14255.8	6394.77	7413.23	7733.89	4633.15	10284.4	6308.9	5957.71	7177.64	4881.37	8011.96	Cytoplasmic Membrane	Inner membrane	397	Inner Membrane	Periplasmic	Periplasmic	Periplasmic	Outer Membrane	-	-	Cell envelope	Other
15802172	Q8XDW9	NP_288194.1	Z2793	gdhA	CY, Ho-6	glutamate dehydrogenase [Escherichia coli O157:H7 EDL933]	63 / 166 / 1248 / 759	48567.4	12269.5	3765.47	1809.95	6762.97	9684.8	5566.4	10504.2	4037.5	12843.9	5954.2	16605.1	5081.77	7907.15	Outer Membrane	Cytoplasm	447	Unknown	Cytoplasmic	Cytoplasmic	Cytoplasmic	Cytoplasmic	-	-	Amino acid biosynthesis	Glutamate family
15803848	P0A7R7	NP_289882.1	Z4692	rpsJ	CY, 30S Rib	30S ribosomal protein S10 [Escherichia coli O157:H7 EDL933]	64 / 190 / 162 / 13	11735.1	14782.9	2001.54	2115.88	5991.44	14871.9	5260.13	3038.65	5723.03	9930.45	10002.8	10759.9	9604.32	7840.24	Cytoplasmic	Cytoplasm	103	Cytoplasmic	Cytoplasmic	Cytoplasmic	Cytoplasmic	Unknown	-	-	Protein synthesis	Ribosomal proteins: synthesis and modification
15800162	Q8XE63	NP_286174.1	Z0535	cyoA	IM, Ht-5	cytochrome o ubiquinol oxidase subunit II [Escherichia coli O157:H7 EDL933]	65 / 856 / 471 / 517	34928.9	7073.25	17055.9	17042.2	6962.12	2617.98	13971	2105.43	14250.5	0	7264.63	3124.84	1860.06	7777.33	Cytoplasmic Membrane	Inner membrane	315	Inner Membrane	Periplasmic	Cytoplasmic	Periplasmic	Inner Membrane	-	-	Energy metabolism	Aerobic
15804153	P0AG88	NP_290192.1	Z5036	secB	CY/IM, Ht-9	preprotein translocase subunit SecB [Escherichia coli O157:H7 EDL933]	66 / 31 / 340 / 70	17276.7	10302.9	2627.55	0	5915.6	18064.9	5934.89	22801.4	4836.58	6528.65	3703.21	2645.56	6321.83	7473.59	Cytoplasmic	Cytoplasm	155	Inner Membrane	Cytoplasmic	Cytoplasmic	Cytoplasmic	Cytoplasmic	-	-	Protein fate	Protein and peptide secretion and trafficking
15803821	P0AG46	NP_289855.1	Z4664	rplQ	Cy, 50S Rib	50S ribosomal protein L17 [Escherichia coli O157:H7 EDL933]	67 / 122 / 395 / 51	14364	5334.74	1018.35	0	1574.49	17044.2	10537.1	1058.52	10747.9	12571.1	9314.44	8251.26	11924.5	7448.05	Cytoplasmic	Cytoplasm	127	Cytoplasmic	Cytoplasmic	Cytoplasmic	Cytoplasmic	Cytoplasmic	-	-	Protein synthesis	Ribosomal proteins: synthesis and modification
15803706	Q8X9M3	NP_289740.1	Z4525	pnp	CY, Ho-3, degradosome	polynucleotide phosphorylase/polyadenylase [Escherichia coli O157:H7 EDL933]	68 / 116 / 1060 / 592	79844	8969.85	5505.62	2521.38	6592.26	9702.56	7234.52	10308.7	6184.49	9864	6592.09	7707.61	6054.26	7269.78	Cytoplasmic	Cytoplasm	711	Cytoplasmic	Cytoplasmic	Cytoplasmic	Cytoplasmic	Cytoplasmic	-	-	Transcription	Transcription factors
161367526	Q8XBP7	NP_289615.2	Z4392	tolC	bb-OM, Ht-7	outer membrane channel protein [Escherichia coli O157:H7 EDL933]	69 / 554 / 663 / 431	53724.5	3295.26	18259.6	16364.3	8829.49	1444.9	6644.38	3582.41	11360	2787.49	6844.05	2265.24	5054.91	7227.67	Outer Membrane	Outer membrane	495	Inner Membrane	Periplasmic	Extracellular	Periplasmic	Outer Membrane	-	-	Cellular processes	Cell division
15801346	Q8X4P5	NP_287363.1	Z1878	(borD)	Ex/OM	putative Bor protein of prophage CP-933X [Escherichia coli O157:H7 EDL933]	70 / - / - / -	10415.9	7195.67	5738.12	6408.11	2626.87	40498.1	0	0	14438.1	9760.25	0	0	0	7222.1	Unknown	Fimbrium	97	Unknown	Cytoplasmic	Cytoplasmic	Cytoplasmic	Periplasmic	-	-	Mobile and extrachromosomal element functions	Prophage functions
161367502	Q8X6P6	NP_290020.2	Z4846	dcrB	L (IM or OM)	conserved protein involved in bacteriophage adsorption DcrB [Escherichia coli O157:H7 EDL933]	71 / 489 / 1037 / 854	19786.8	8232.85	10910.4	15147.6	4125.41	6892.35	10348.2	6276.8	9851.5	2832.77	3766.59	4630.46	3444.31	7204.94	Periplasmic	Inner membrane	203	periplasm	Periplasmic	Periplasmic	Periplasmic	Outer Membrane	-	-	Hypothetical proteins	Conserved
15800620	Q8X6N7	NP_286634.1	Z1095	ybjP	L (IM or OM)	putative lipoprotein [Escherichia coli O157:H7 EDL933]	72 / 946 / - / 392	19150.43*	9638	11831.5	15442.4	6640.6	4905.41	9994.38	2020.73	10873.9	2372.49	4157.48	2965.03	5322.47	7180.36	Unknown	Outer membrane	173	Unknown	X	Periplasmic	Periplasmic	Periplasmic	-	-	Energy metabolism	Electron transport
15804455	P0A9C7	NP_290495.1	Z5406	glnA	CY, Ho-12	glutamine synthetase [Escherichia coli O157:H7 EDL933]	73 / 225 / 539 / 957	51921.36*	4142.13	7822.8	8598.15	7244.61	0	3304.07	11802	2096.99	12533.1	5726.81	12813.3	9677.64	7146.8	Cytoplasmic	Cytoplasm	469	Cytoplasmic	X	Cytoplasmic	Cytoplasmic	Cytoplasmic	-	-	Amino acid biosynthesis	Glutamate family
15799851	P0A7V2	NP_285863.1	Z0180	rpsB	CY, 30S Rib	30S ribosomal protein S2 [Escherichia coli O157:H7 EDL933]	74 / 156 / 218 / 47	26742.6	9668.71	674.383	493.211	2624.33	3854.48	10887.1	1842.88	5784.83	14127.1	10110.9	15407.8	8899.04	7031.22	Cytoplasmic	Cytoplasm	241	Unknown	Cytoplasmic	Cytoplasmic	Cytoplasmic	Cytoplasmic	-	-	Protein synthesis	Ribosomal proteins: synthesis and modification
15801436	P0A719	NP_287453.1	Z1978	prsA	CY	ribose-phosphate pyrophosphokinase [Escherichia coli O157:H7 EDL933]	75 / 182 / 199 / 147	34216.06*	4747.85	1457.1	757.116	9813.82	4996.87	4923.41	6304.49	3124.72	9639	11605.6	12484	13983.7	6986.47	Cytoplasmic	Cytoplasm	315	Cytoplasmic	X	Cytoplasmic	Cytoplasmic	Cytoplasmic	-	-	Purines, pyrimidines, nucleosides, and nucleotides	Purine ribonucleotide biosynthesis
15803438	Q8XD33	NP_289471.1	Z4240	gcvP	CY, Ht-6	glycine dehydrogenase [Escherichia coli O157:H7 EDL933]	76 / 50 / 847 / 375	104342.29*	10584.5	2537.76	2045.48	1671.25	12764.2	2667.74	22345.8	2695.18	10072.7	2853.6	11937.2	1217.74	6949.42	Cytoplasmic	Cytoplasm	957	Unknown	X	Cytoplasmic	Cytoplasmic	Cytoplasmic	-	-	Energy metabolism	Amino acids and amines
15803844	P60424	NP_289878.1	Z4688	rplB	Cy, 50S Rib	50S ribosomal protein L2 [Escherichia coli O157:H7 EDL933]	77 / 227 / 486 / 18	29859.3	3893.33	4779.39	3939.83	2146.01	6658.51	6392.39	1360.48	6588.87	15808.4	9796.75	11441.5	8600.18	6783.8	Cytoplasmic	Cytoplasm	273	Cytoplasmic	Periplasmic	Cytoplasmic	Extracellular	Cytoplasmic	-	-	Protein synthesis	Ribosomal proteins: synthesis and modification
15802834	P0AFC9	NP_288861.1	Z3546	nuoB	IM, Ht-13	NADH dehydrogenase subunit B [Escherichia coli O157:H7 EDL933]	78 / 267 / 409 / 243	25044.65*	8737.76	3351.98	6842.11	8600.47	3277.41	9708.06	6106.61	5281.19	7127.39	8076.76	6757.36	6318.87	6682.16	Cytoplasmic Membrane	Cytoplasm	220	periplasm	X	Cytoplasmic	Periplasmic	Cytoplasmic	-	-	Energy metabolism	Aerobic
15801211	P0A6B0	NP_287228.1	Z1733	acpP	CY	acyl carrier protein [Escherichia coli O157:H7 EDL933]	79 / 69 / 2 / 79	8639.19	17937.8	1698.48	1875.33	3089.8	14738.6	9688.08	6265.02	4183.37	0	3214.38	10404.2	6189.36	6607.04	Cytoplasmic	Cytoplasm	78	Cytoplasmic	Cytoplasmic	Cytoplasmic	Cytoplasmic	Cytoplasmic	-	-	Fatty acid and phospholipid metabolism	Biosynthesis					most abundant protein in the E. coli cell; 1,500,000
15803035	Q8XAA9	NP_289065.1	Z3775	yfgL	L-OM, Ht-5	outer membrane protein assembly complex subunit YfgL [Escherichia coli O157:H7 EDL933]	80 / 415 / 726 / 534	41827.5	5722.74	8781.42	10529.2	5376.78	7528.62	4945.29	8726.14	7826.15	4620.88	4488.33	4023.35	3351.84	6326.73	Outer Membrane	Cytoplasm	392	Unknown	Periplasmic	Periplasmic	Periplasmic	Unknown	-	-	Protein fate	Degradation of proteins, peptides, and glycopeptides
15803715	P0AGA1	NP_289749.1	Z4537	secG	IM, Ht-9	preprotein translocase subunit SecG [Escherichia coli O157:H7 EDL933]	81 / 224 / - / 469	11384.45*	0	5550.93	6099.28	4979.39	6257.14	8336.06	11798.1	6802.23	3022.72	5201.48	11190.3	6659	6324.71	Cytoplasmic Membrane	Inner membrane	110	Inner Membrane	X	Extracellular	Extracellular	Inner Membrane	-	-	Energy metabolism	Electron transport
15800773	P0A6Y3	NP_286787.1	Z1258	ihfB	CY, Ht-2	integration host factor subunit beta [Escherichia coli O157:H7 EDL933]	82 / 82 / 232 / 174	10650.7	3485.43	3565.9	4899.18	5603.98	6113.13	0	1623.92	2068.42	10320.3	14201	14377.2	9616.23	6322.89	Cytoplasmic	Cytoplasm	94	Cytoplasmic	Cytoplasmic	Cytoplasmic	Cytoplasmic	Cytoplasmic	-	-	DNA metabolism	DNA replication, recombination, and repair
15804161	P0AB78	NP_290200.1	Z5044	kbl	CY, Ho-2	2-amino-3-ketobutyrate coenzyme A ligase [Escherichia coli O157:H7 EDL933]	83 / 103 / 499 / 45	43115.3	7250.19	5855.41	7079.34	6047.05	4016.04	6594.98	5600.34	4305.21	8715.33	5212.45	8262.86	6673.05	6301.02	Cytoplasmic	Inner membrane	398	Cytoplasmic	Cytoplasmic	Cytoplasmic	Cytoplasmic	Cytoplasmic	-	-	Energy metabolism	Amino acids and amines
15800161	P0ABJ0	NP_286173.1	Z0534	cyoB	IM, Ht-5	cytochrome o ubiquinol oxidase subunit I [Escherichia coli O157:H7 EDL933]	84 / 674 / 870 / 606	74365.4	2602.17	11981.3	10974	4034.82	6845.94	10121	1250.3	7952.84	2476.6	7952.49	3005.6	2395.5	5966.05	Cytoplasmic Membrane	Inner membrane	663	Inner Membrane	Cytoplasmic	Cytoplasmic	Cytoplasmic	Inner Membrane	-	-	Energy metabolism	Electron transport
15803331	Q8X6P9	NP_289364.1	Z4126	(ygdI)	L (IM or OM)	putative lipoprotein Z4126 [Escherichia coli O157:H7 EDL933]	85 / 345 / - / 230	8342.37*	2945.27	3995.3	10001.8	8171.93	0	15373.9	12433.6	5575.6	0	4255.4	0	8187.29	5911.67	Unknown	Extracellular	76	Unknown	X	Periplasmic	Periplasmic	Periplasmic	-	-	Hypothetical proteins	Conserved
15804334	P0ABB2	NP_290373.1	Z5232	atpA	CY/IM, Ht-9	F0F1 ATP synthase subunit alpha [Escherichia coli O157:H7 EDL933]	86 / 76 / 36 / 232	55219.9	8499.58	1672.11	1654.05	1051.12	11181.7	5838.24	1675.43	5532.4	4701.08	8774.32	6404.62	12837.7	5818.53	Cytoplasmic	Inner membrane	513	Inner Membrane	Cytoplasmic	Cytoplasmic	Cytoplasmic	Cytoplasmic	-	-	Energy metabolism	ATP-proton motive force interconversion
15802828	P0AFD8	NP_288855.1	Z3540	nuoI	IM, Ht-13	NADH dehydrogenase subunit I [Escherichia coli O157:H7 EDL933]	87 / 338 / 794 / 280	20537	7683.76	5895.28	4165.45	8319.33	7220.33	5691.34	6137.13	3612.11	8356.84	4734.99	3395.57	4041.2	5771.11	Cytoplasmic	Cytoplasm	180	periplasm	Cytoplasmic	Cytoplasmic	Cytoplasmic	Cytoplasmic	-	-	Energy metabolism	Electron transport
157267368	Q8XBD3	NP_289030.2	Z3736	nlpB	L-OM, Ht-5	lipoprotein NlpB [Escherichia coli O157:H7 EDL933]	88 / 499 / 386 / 707	36953.97*	4550.27	3927.54	8153.99	8621.64	3741.35	7372.69	5962.63	9091.03	2886.84	6542.74	873.229	7329.09	5754.42	Outer Membrane	Outer membrane	345	Outer Membrane	X	Periplasmic	Periplasmic	Extracellular	-	-	Cell envelope	Other
15802835	P0AFC5	NP_288862.1	Z3547	nuoA	IM, Ht-13	NADH dehydrogenase subunit A [Escherichia coli O157:H7 EDL933]	89 / 524 / 1150 / 834	16462.4*	4624.6	15375.4	9099.66	8496.1	6083.95	6660.55	5386.69	7246.69	1932.13	1104.61	2374.99	0	5698.79	Cytoplasmic Membrane	Inner membrane	147	Inner Membrane	X	Cytoplasmic	Cytoplasmic	Inner Membrane	-	-	Energy metabolism	Aerobic
15803841	P0A7V5	NP_289875.1	Z4685	rpsC	CY, 30S Rib	30S ribosomal protein S3 [Escherichia coli O157:H7 EDL933]	90 / 266 / 500 / 6	26044.05*	4285.25	8219.53	6320.79	4059.75	2817.91	3703.08	2620.5	7050.68	12234.2	6546.77	2485.5	7888.25	5686.01	Cytoplasmic	Cytoplasm	233	Cytoplasmic	X	Cytoplasmic	Cytoplasmic	Unknown	-	-	Protein synthesis	Ribosomal proteins: synthesis and modification
15800968	A7UQX0	NP_286984.1	Z1474	borW	L (IM or OM)	putative Bor protein precursor of bacteriophage BP-933W [Escherichia coli O157:H7 EDL933]	91 / - / - / 135	10476.9	0	5300.05	5804.42	24408.8	0	3051.85	0	3273.07	0	17848.2	5457.45	2842.48	5665.53	Unknown	Fimbrium	97	Unknown	Cytoplasmic	Cytoplasmic	Cytoplasmic	Periplasmic	-	-	Mobile and extrachromosomal element functions	Prophage functions
15804041	Q8X5P5	NP_290077.1	Z4908	slp	L-OM, Ho-Mu	outer membrane protein induced after carbon starvation [Escherichia coli O157:H7 EDL933]	92 / 334 / 1110 / 467	22209.6	8895.4	5849.92	7490.11	10506.8	2646.43	5490.67	8881.11	5973.85	763.651	3654.43	1957.84	4678.45	5565.72	Outer Membrane	Outer membrane	199	Outer Membrane	Periplasmic	Periplasmic	Periplasmic	Unknown	-	-	Cell envelope	Other
15804763	P0ABC8	NP_290804.1	Z5781	hflK	IM, Ht-18	FtsH protease regulator HflK [Escherichia coli O157:H7 EDL933]	93 / 378 / 442 / 424	45543	3794.64	10973.7	12061.4	6033.48	3072.05	5549.28	2855.97	6586.51	3703.76	3567.53	3160.32	5104.52	5538.6	Unknown/Multiple Localization	Inner membrane	419	Unknown	Periplasmic	Cytoplasmic	Periplasmic	Inner Membrane	-	-	Protein fate	Degradation of proteins, peptides, and glycopeptides
15804545	Q8X758	NP_290585.1	Z5503	yijI	L (IM or OM)	uncharacterized protein YijI [Escherichia coli O157:H7 EDL933]	94 / 130 / 851 / 1101	16572.3	11034.5	0	0	3350.89	5670.05	8336.15	3242.64	798.457	4405.57	16054.9	9464.05	4024.32	5531.79	Unknown	Extracellular	154	Unknown	Periplasmic	Periplasmic	Periplasmic	Unknown	-	-	No Data	No Data
15802833	Q8XCW9	NP_288860.1	Z3545	nuoC	CY/IM, Ht-13	bifunctional NADH:ubiquinone oxidoreductase subunit C/D [Escherichia coli O157:H7 EDL933]	95 / 286 / 1053 / 132	68678.1	7859.94	4484.19	4418.78	6526.39	8749.44	5050.57	5774.82	4358.12	4858.74	4636.57	5299.2	4080.86	5508.14	Cytoplasmic	Cytoplasm	600	Unknown	Cytoplasmic	Cytoplasmic	Cytoplasmic	Cytoplasmic	-	-	Energy metabolism	Aerobic
15801465	P0ACG0	NP_287482.1	Z2013	hns	CY, Ho-2, Ht-Mu	global DNA-binding transcriptional dual regulator H-NS [Escherichia coli O157:H7 EDL933]	96 / 36 / 7 / 107	15539	12619.1	380.335	1182.38	0	15678.9	11510.5	487.405	9886.96	3557.49	2016.08	6505.98	1290.37	5426.29	Cytoplasmic	Cytoplasm	137	Cytoplasmic	Cytoplasmic	Cytoplasmic	Cytoplasmic	Cytoplasmic	-	-	Cellular processes	Pathogenesis
15803211	Q8X3W8	NP_289243.1	Z3999	alaS	CY, Ho-2, Ho-10	alanyl-tRNA synthetase [Escherichia coli O157:H7 EDL933]	97 / 253 / 763 / 753	96401	5457.97	7423.43	7008.54	3931.48	4569.29	4394.91	5981.74	5481.43	6138.45	3834.77	6331.39	4338.47	5407.66	Cytoplasmic	Cytoplasm	876	Cytoplasmic	Cytoplasmic	Cytoplasmic	Cytoplasmic	Cytoplasmic	-	-	Protein synthesis	tRNA aminoacylation
15803460	Q8XD03	NP_289493.1	Z4265	pgk	CY, Ho-1	phosphoglycerate kinase [Escherichia coli O157:H7 EDL933]	98 / 62 / 34 / 352	41128.6	10186.9	5731.56	3436.17	1169.79	14741.6	4694.9	5220.85	4469.55	2585.15	3417.74	3151.2	5625.56	5369.24	Cytoplasmic	Cytoplasm	387	Cytoplasmic	Cytoplasmic	Cytoplasmic	Cytoplasmic	Unknown	-	-	Energy metabolism	Glycolysis/gluconeogenesis
15804305	Q8XB34	NP_290344.1	Z5203	tnaA	CY, Ho-4	tryptophanase [Escherichia coli O157:H7 EDL933]	99 / 5 / 74 / 139	53424.2	896.752	7247.18	5240.45	0	443.104	7947.74	10944.5	5375.25	4415.68	7505.78	4998.09	8236.28	5270.9	Cytoplasmic	Cytoplasm	471	Unknown	Cytoplasmic	Cytoplasmic	Cytoplasmic	Cytoplasmic	-	-	Energy metabolism	Amino acids and amines
15804397	P0ADN8	NP_290437.1	Z5325	(yifI)	L (IM or OM)	uncharacterized protein YifI [Escherichia coli O157:H7 EDL933]	100 / 452 / - / 763	7176.92	7723.35	1462.75	0	2649.79	2501.53	8343.47	2698.83	7262.16	4828.89	5538.74	5950.16	14218.5	5264.85	Unknown	Outer membrane	67	periplasm	Periplasmic	Periplasmic	Periplasmic	Periplasmic	-	-	Cell envelope	Other
15801222	P0AB39	NP_287239.1	Z1744	ycfM	L (IM or OM)	predicted outer membrane lipoprotein YcfM [Escherichia coli O157:H7 EDL933]	101 / - / - / 1112	22514.7	4247.51	8147.15	8059.19	5853.08	1965.81	7340.95	5194.84	7986.96	1330.94	5343.98	1636	4886.74	5166.1	Unknown	Periplasm	213	Extracellular	Periplasmic	Periplasmic	Periplasmic	Periplasmic	-	-	Transport and binding proteins	Other
15802890	Q8XCN6	NP_288917.1	Z3608	fadL	bb-OM	long-chain fatty acid outer membrane transporter [Escherichia coli O157:H7 EDL933]	102 / 857 / 1353 / 579	48766.9	5441.03	12903.2	12096.5	5452.92	3253.65	8548.83	2765.53	6510.79	1252	1778.08	0	1365.79	5114.03	Outer Membrane	Outer membrane	446	Inner Membrane	Extracellular	Extracellular	Extracellular	Outer Membrane	-	-	Transport and binding proteins	Carbohydrates, organic alcohols, and acids
15801212	P0AAI7	NP_287229.1	Z1734	fabF	CY, Ho-2	3-oxoacyl-(acyl carrier protein) synthase II [Escherichia coli O157:H7 EDL933]	103 / 206 / 421 / 435	43043.9	2814.23	4858.18	0	7756.05	1834.86	2431.91	4425.3	3307.4	8927.21	8093.06	8705.56	7123.08	5023.07	Cytoplasmic	Cytoplasm	413	Cytoplasmic	Cytoplasmic	Cytoplasmic	Cytoplasmic	Extracellular	-	-	Fatty acid and phospholipid metabolism	Biosynthesis
15802363	Q8XBB5	NP_288389.1	Z3018	yedD	L (IM or OM)	conserved protein YedD [Escherichia coli O157:H7 EDL933]	104 / 552 / - / 1039	15000.7	7471.14	1030.22	1140.24	6551.52	3574.09	7630.01	8544.09	7024.31	2585.42	4394.7	5252.56	4375.89	4964.52	Unknown	Cytoplasm	137	periplasm	Cytoplasmic	Periplasmic	Periplasmic	Outer Membrane	-	-	Unknown function	General
161367472	Q8X727	NP_290599.2	Z5521	udhA	CY, Ho-8	soluble pyridine nucleotide transhydrogenase [Escherichia coli O157:H7 EDL933]	105 / 247 / 514 / 187	51543.5	6476.93	1242.34	0	3346.96	5538.53	5317.17	3847.58	4871.65	10683.9	4889.35	7513.41	5067.14	4899.57	Cytoplasmic	Cytoplasm	466	Cytoplasmic	Cytoplasmic	Cytoplasmic	Cytoplasmic	Cytoplasmic	-	-	Energy metabolism	Electron transport
15804651	P0AGE2	NP_290692.1	Z5658	ssb	CY, Ho-4, Ho-8	single-strand DNA-binding protein [Escherichia coli O157:H7 EDL933]	106 / 133 / 1186 / 562	18965.0*	9282.76	635.615	516.791	1162.88	11101.9	1452.36	9436.35	4760.5	6424.68	604.702	9136.7	3106.84	4801.84	Cytoplasmic	Cytoplasm	178	Cytoplasmic	X	Cytoplasmic	Periplasmic	Cytoplasmic	-	-	DNA metabolism	DNA replication, recombination, and repair
15804523	P0A7C0	NP_290563.1	Z5479	hslV	CY, Ho-6, Ht-24	ATP-dependent protease peptidase subunit [Escherichia coli O157:H7 EDL933]	107 / 119 / 661 / 1419	19092.1	5705.49	11381.5	8660.44	782.523	4440.96	1972.15	3189.94	0	7239.5	817.92	10589.6	2079.31	4738.28	Cytoplasmic	Cytoplasm	176	Cytoplasmic	Cytoplasmic	Cytoplasmic	Cytoplasmic	Cytoplasmic	-	-	Protein fate	Degradation of proteins, peptides, and glycopeptides
15803907	Q8X733	NP_289943.1	Z4758	pckA	CY, Ho-1	phosphoenolpyruvate carboxykinase [Escherichia coli O157:H7 EDL933]	108 / 54 / 82 / 150	59632.86*	2229.6	3207.45	211.31	3456.45	0	963.352	7011.96	524.064	8487.19	10419.2	9052.4	11286.6	4737.47	Cytoplasmic	Cytoplasm	540	Cytoplasmic	X	Cytoplasmic	Cytoplasmic	Cytoplasmic	-	-	Energy metabolism	Glycolysis/gluconeogenesis
15804155	P0AG29	NP_290194.1	Z5038	yibN	IM, new N-term TMD	predicted rhodanese-related sulfurtransferase Z5038 [Escherichia coli O157:H7 EDL933]	109 / 581 / - / 648	15595.7	4869.27	5603.85	6843.64	3354.94	0	6311.65	4537.35	8393.1	2059.48	5834.52	1177.65	6722.49	4642.33	Unknown	Cytoplasm	143	Unknown	Cytoplasmic	Cytoplasmic	Cytoplasmic	Inner Membrane	-	-	Unknown function	General
15803733	P64605	NP_289767.1	Z4556	yrbD (mlaD)	IM, Ht-8	putative phospholipid ABC transporter MlaD [Escherichia coli O157:H7 EDL933]	110 / 450 / 961 / 515	19575.5	4852.04	3102.23	11593	2785.88	0	6289.31	2260.65	9123.7	3078.29	4069.71	3752.33	4465.8	4614.41	Unknown	Cytoplasm	183	Unknown	Cytoplasmic	Periplasmic	Cytoplasmic	Unknown	-	-	Unknown function	General
15802826	P0AFE6	NP_288853.1	Z3538	nuoK	IM, Ht-13	NADH dehydrogenase subunit K [Escherichia coli O157:H7 EDL933]	111 / - / - / -	10844.7	2668.24	4121.56	13591.6	9254.1	0	4642.6	3754.69	7576.74	0	7724.96	0	1585.8	4576.69	Cytoplasmic Membrane	Inner membrane	100	Inner Membrane	Cytoplasmic	Cytoplasmic	Cytoplasmic	Inner Membrane	-	-	Energy metabolism	Electron transport
15803692	P64598	NP_289726.1	Z4509	yraP	L (IM or OM)	putative lipoprotein YraP [Escherichia coli O157:H7 EDL933]	112 / 530 / 200 / 888	20027.1	3654	11681.2	13866.1	2937.22	3204.72	2631.33	2553.69	3435.47	2318.22	3064.84	1883.7	3363.13	4549.48	Periplasmic	Periplasm	191	periplasm	Cytoplasmic	Periplasmic	Cytoplasmic	Periplasmic	-	-	Cell envelope	Other
15799818	Q8X929	NP_285830.1	Z0145	panB	CY, Ho-10	3-methyl-2-oxobutanoate hydroxymethyltransferase [Escherichia coli O157:H7 EDL933]	113 / 245 / 1085 / 1057	28308.5	7074.35	7753.89	7669.41	2086.87	968.833	766.256	8475.58	0	3847.03	3632.88	7815.65	2790.52	4406.77	Cytoplasmic	Cytoplasm	264	Cytoplasmic	Cytoplasmic	Cytoplasmic	Cytoplasmic	Cytoplasmic	-	-	Biosynthesis of cofactors, prosthetic groups, and carriers	Pantothenate and coenzyme A
161367558	Q8XBJ4	NP_288987.2	Z3691	ucpA	CY	predicted NAD(P)-binding oxidoreductase [Escherichia coli O157:H7 EDL933]	114 / 141 / 265 / 274	27830.8	6821.38	3271.02	1033.05	2056.22	2243.49	5157.84	591.681	6012.58	8114.45	3371.61	8572.4	5101.18	4362.24	Cytoplasmic	Cytoplasm	263	Cytoplasmic	Cytoplasmic	Cytoplasmic	Cytoplasmic	Cytoplasmic	-	-	Central intermediary metabolism	Other
15804391	Q8XAP7	NP_290431.1	Z5317	hemX	IM, Ho-Mu	putative uroporphyrinogen III C-methyltransferase [Escherichia coli O157:H7 EDL933]	115 / 539 / 935 / 986	43478.8	3579.28	6865.43	5734.88	4685.65	2354.39	5876.75	3251.91	7066.96	2724.98	4374.59	2214.43	3294.36	4335.3	Cytoplasmic Membrane	Cytoplasm	399	Unknown	Periplasmic	Cytoplasmic	Periplasmic	Inner Membrane	-	-	Biosynthesis of cofactors, prosthetic groups, and carriers	Heme, porphyrin, and cobalamin
15803765	P0AA12	NP_289799.1	Z4589	rplM	Cy, 50S Rib	50S ribosomal protein L13 [Escherichia coli O157:H7 EDL933]	116 / 308 / 533 / 59	16017.9	2807.86	3231.46	0	0	0	1818.17	325.063	1979.95	12469.8	12112.1	9771.59	7106.95	4301.91	Cytoplasmic	Cytoplasm	142	Cytoplasmic	Cytoplasmic	Cytoplasmic	Cytoplasmic	Cytoplasmic	-	-	Protein synthesis	Ribosomal proteins: synthesis and modification
15804435	Q8X8J4	NP_290475.1	Z5366	fadA	CY, Ht-4	3-ketoacyl-CoA thiolase [Escherichia coli O157:H7 EDL933]	117 / 159 / 296 / 508	40839.4	2751.62	2111.15	242.946	5687.61	1423.79	3804.49	5769.12	3104.47	6982.87	5934.75	5958.31	7597.74	4280.74	Cytoplasmic	Cytoplasm	387	Cytoplasmic	Cytoplasmic	Cytoplasmic	Cytoplasmic	Cytoplasmic	-	-	Fatty acid and phospholipid metabolism	Degradation
15803716	Q8X9L2	NP_289750.1	Z4538	glmM	CY	phosphoglucosamine mutase [Escherichia coli O157:H7 EDL933]	118 / 282 / 927 / 742	47544.7	3757.28	3074.92	4013.38	2416.19	2306.71	2597.48	5426.8	3061.56	7945.81	2341.09	10847.9	2997.1	4232.19	Cytoplasmic	Cytoplasm	445	Cytoplasmic	Cytoplasmic	Cytoplasmic	Cytoplasmic	Cytoplasmic	-	-	Cell envelope	Biosynthesis and degradation of murein sacculus and peptidoglycan
15803076	Q8XA55	NP_289107.1	Z3827	glyA	CY, Ho-2	serine hydroxymethyltransferase [Escherichia coli O157:H7 EDL933]	119 / 63 / 208 / 335	45342.9	352.934	1637.98	2100.38	4167.68	235.5	0	2984.05	0	8578.17	12278.9	4953.07	13099.7	4199.03	Cytoplasmic	Cytoplasm	417	Cytoplasmic	Cytoplasmic	Cytoplasmic	Cytoplasmic	Cytoplasmic	-	-	Amino acid biosynthesis	Serine family
15802789	Q8X5A0	NP_288816.1	Z3498	glpT	IM	sn-glycerol-3-phosphate transporter [Escherichia coli O157:H7 EDL933]	120 / 760 / 1326 / 717	50341.6	4572.64	3118.5	4284.48	7701.35	2651.41	6585.72	2840.62	3821.48	2578.69	6940.17	0	5143.89	4186.58	Cytoplasmic Membrane	Inner membrane	452	Inner Membrane	Cytoplasmic	Cytoplasmic	Cytoplasmic	Inner Membrane	-	-	Transport and binding proteins	Other
15803823	P0A7W0	NP_289857.1	Z4666	rpsD	CY, 30S Rib	30S ribosomal protein S4 [Escherichia coli O157:H7 EDL933]	121 / 232 / 391 / 11	23468.2	6418.61	4924.61	1248.71	3401.87	4546.36	5973.29	341.336	3713.68	2505.95	5679.5	4582.01	6816.53	4179.37	Cytoplasmic	Cytoplasm	206	Cytoplasmic	Cytoplasmic	Cytoplasmic	Cytoplasmic	Cytoplasmic	-	-	Protein synthesis	Ribosomal proteins: synthesis and modification
15799802	Q8X957	NP_285814.1	Z0128	acnB	CY, Ho-2	bifunctional aconitate hydratase 2/2-methylisocitrate dehydratase [Escherichia coli O157:H7 EDL933]	122 / 53 / 285 / 12	93480.3	6901.83	2461.22	2541.22	1674.43	7289.41	2184.07	4891.45	1919.3	4317.07	5730.75	4510.59	5726.12	4178.95	Cytoplasmic	Cytoplasm	865	Unknown	Cytoplasmic	Cytoplasmic	Cytoplasmic	Cytoplasmic	-	-	Energy metabolism	TCA cycle
15804061	P58228	NP_290097.1	Z4930	gadA	CY/IM, Ho-6	glutamate decarboxylase isozyme [Escherichia coli O157:H7 EDL933]	123 / 252 / 1196 / -	52697.2	342.832	0	0	0	0	0	19430.7	0	1305.81	246.451	28137.5	315.731	4148.25	Cytoplasmic	Cytoplasm	466	Unknown	Cytoplasmic	Cytoplasmic	Cytoplasmic	Cytoplasmic	-	-	Central intermediary metabolism	Other
15799859	P0A942	NP_285871.1	Z0188	yaeT	bb-OM, Ht-5	outer membrane protein assembly factor YaeT [Escherichia coli O157:H7 EDL933]	124 / 786 / 732 / 848	90549.1	2790.39	6993.59	9098.62	4614.19	2692.02	5465.62	1820.12	5946.61	0	3878.5	1150.45	4280.43	4060.88	Outer Membrane	Outer membrane	810	Outer Membrane	Extracellular	Extracellular	Periplasmic	Outer Membrane	-	-	Cell envelope	Other
15800391	Q8X9G6	NP_286403.1	Z0837	pgm	CY	phosphoglucomutase [Escherichia coli O157:H7 EDL933]	125 / 256 / 441 / 487	58304.26*	3029.98	1743.54	847.54	2957.52	1660.89	4363.92	3352.84	2136.58	6407.73	5627.47	9372.97	6739.56	4020.05	Cytoplasmic	Cytoplasm	546	Cytoplasmic	X	Cytoplasmic	Cytoplasmic	Cytoplasmic	-	-	Energy metabolism	Sugars
15800373	P0A9K5	NP_286385.1	Z0809	ybeZ	CY	putative ATP-binding protein in pho regulon [Escherichia coli O157:H7 EDL933]	126 / 418 / 705 / 366	40652.9	3310.9	5362.76	3412.48	3548.56	3387.76	1589.5	3599.41	1729.38	6068.23	4231.71	8534.96	3047.34	3985.25	Cytoplasmic	Cytoplasm	346	Cytoplasmic	Cytoplasmic	Cytoplasmic	Cytoplasmic	Cytoplasmic	-	-	Unknown function	General
15802778	Q8XE30	NP_288805.1	Z3484	gyrA	CY, Ht-4	DNA gyrase subunit A [Escherichia coli O157:H7 EDL933]	127 / 435 / - / 1058	96985.21*	4161.66	3413.2	3267.44	4350.53	3398.23	2356.19	6519.02	2023.85	5826.86	4126.88	5549.01	2641.64	3969.54	Cytoplasmic	Cytoplasm	875	Unknown	X	Cytoplasmic	Cytoplasmic	Cytoplasmic	-	-	DNA metabolism	DNA replication, recombination, and repair
15799838	Q8X4V5	NP_285850.1	Z0165	hemL	CY, Ho-2	glutamate-1-semialdehyde aminotransferase [Escherichia coli O157:H7 EDL933]	128 / 169 / 355 / 177	45354.2	7158.57	1830.78	390.374	2301.72	6906.2	4536.44	3668.83	8076.52	1196.93	4460.37	4428.87	2196.24	3929.32	Cytoplasmic	Cytoplasm	426	Cytoplasmic	Cytoplasmic	Cytoplasmic	Cytoplasmic	Cytoplasmic	-	-	Biosynthesis of cofactors, prosthetic groups, and carriers	Heme, porphyrin, and cobalamin
15800183	Q8XD73	NP_286195.1	Z0565	ybaY	L (IM or OM)	glycoprotein/polysaccharide metabolism [Escherichia coli O157:H7 EDL933]	129 / 764 / 1027 / 1050	19440.3	2679.6	0	0	2769.38	0	4625.12	2794.45	7558.03	0	9632.36	4144.55	12331.5	3877.91	Periplasmic	Fimbrium	190	periplasm	Periplasmic	Periplasmic	Periplasmic	Periplasmic	-	-	Regulatory functions	Other
15799798	P0AFG9	NP_285810.1	Z0124	aceE	CY, Ho-24	pyruvate dehydrogenase subunit E1 [Escherichia coli O157:H7 EDL933]	130 / 109 / 501 / 57	99664.7	1883.05	3569.39	2615.45	5037.06	728.61	861.477	2864.27	520.715	8292.41	5415.2	8052.26	6626.76	3872.22	Cytoplasmic	Cytoplasm	887	Cytoplasmic	Cytoplasmic	Cytoplasmic	Cytoplasmic	Cytoplasmic	-	-	Energy metabolism	Pyruvate dehydrogenase
15800202	P0A6Z5	NP_286214.1	Z0590	htpG	CY, Ho-2, Ho-Mu	heat shock protein 90 [Escherichia coli O157:H7 EDL933]	131 / 60 / 402 / 506	71423.5*	3935.83	1294.17	474.147	290.549	2958.76	485.877	14440.9	396.476	9453	1212.7	9783.58	1164.38	3824.2	Cytoplasmic	Cytoplasm	624	Cytoplasmic	X	Cytoplasmic	Cytoplasmic	Cytoplasmic	-	-	Protein fate	Protein folding and stabilization
15802267	Q8XCJ4	NP_288291.1	Z2906	pykA	CY, Ho-4	pyruvate kinase [Escherichia coli O157:H7 EDL933]	132 / 91 / 577 / 678	51371.83*	3753.93	0	0	189.911	4629.88	2027.47	11314	3088.25	9228.77	1855.46	8346.44	1295.66	3810.81	Cytoplasmic	Cytoplasm	480	Cytoplasmic	X	Cytoplasmic	Cytoplasmic	Cytoplasmic	-	-	Energy metabolism	Glycolysis/gluconeogenesis
15800140	P0A928	NP_286152.1	Z0512	tsx	bb-OM	nucleoside channel; receptor of phage T6 and colicin K [Escherichia coli O157:H7 EDL933]	133 / - / - / 741	33588.18*	950.589	8810.99	8832.88	3956.25	2184.36	823.516	5350.59	888.879	0	8256.31	0	5284.92	3778.27	Outer Membrane	Outer membrane	294	Outer Membrane	X	Extracellular	Extracellular	Outer Membrane	-	-	Transport and binding proteins	Nucleosides, purines and pyrimidines
15802232	P69807	NP_288255.1	Z2862	manZ	IM, Ht-7	mannose-specific PTS system protein IID [Escherichia coli O157:H7 EDL933]	134 / 816 / 1086 / 929	31301.8	3571.75	2191.87	8432.75	7382.81	777.191	3086.51	1996.96	6044.63	2719.24	4622.16	2209.77	1972.45	3750.68	Cytoplasmic Membrane	Inner membrane	286	Inner Membrane	Cytoplasmic	Cytoplasmic	Cytoplasmic	Inner Membrane	-	-	Transport and binding proteins	Carbohydrates, organic alcohols, and acids
15803353	P65296	NP_289386.1	Z4151	(ygdR)	L (IM or OM)	predicted lipoprotein YgdR [Escherichia coli O157:H7 EDL933]	135 / 538 / - / 612	7876.59	6999.79	0	5803.58	0	9141.92	0	9849.96	13105.3	0	0	0	0	3741.71	Unknown	Outer membrane	72	Unknown	Cytoplasmic	Cytoplasmic	Cytoplasmic	Outer Membrane	-	-	Cell envelope	Other
15802196	Q8X592	NP_288218.1	Z2822	yeaF (mipA)	bb-OM, Ht-3	scaffolding protein that interacts with murein polymerase and murein hydrolase [Escherichia coli O157:H7 EDL933]	136 / 650 / 1014 / 468	27801.8	3455.03	4616.54	15328.6	2995.72	2256.18	4508.68	2418.28	2452.73	1088.6	623.302	4034.96	792.277	3714.24	Outer Membrane	Outer membrane	248	Outer Membrane	Extracellular	Extracellular	Extracellular	Outer Membrane	-	-	Unknown function	General
15800171	Q8XE55	NP_286183.1	Z0548	ppiD (ybaU)	IM, Ht-3	peptidyl-prolyl cis-trans isomerase (rotamase D) [Escherichia coli O157:H7 EDL933]	137 / 303 / 1352 / 1095	68147.1	3412.26	5698.05	6262.81	3734.02	2376.55	4336.31	2525.02	3963.05	2546.88	3319.05	2483.65	3694.86	3696.04	Cytoplasmic Membrane	Cytoplasm	623	periplasm	Periplasmic	Cytoplasmic	Periplasmic	Inner Membrane	-	-	Cell envelope	Biosynthesis and degradation of murein sacculus and peptidoglycan
15800066	Q8X690	NP_286078.1	Z0433	codA	CY, Ho-6	cytosine deaminase [Escherichia coli O157:H7 EDL933]	138 / 186 / - / 1108	47622.4	4677.76	0	0	2014.36	2307.71	1010.57	8581.56	2199	5935.44	5464.91	9948.25	1614.52	3646.17	Cytoplasmic	Cytoplasm	427	Unknown	Cytoplasmic	Cytoplasmic	Cytoplasmic	Unknown	-	-	Purines, pyrimidines, nucleosides, and nucleotides	Salvage of nucleosides and nucleotides
15804752	P0A8K3	NP_290793.1	Z5766	psd	IM, Ht-2	phosphatidylserine decarboxylase [Escherichia coli O157:H7 EDL933]	139 / 752 / - / 1306	35933.1	3393.14	1735.57	2384.49	7403.28	1485.43	2932.17	3557.07	3190.21	2870.29	4472.35	4373.48	5725.56	3626.92	Cytoplasmic Membrane	Cytoplasm	322	Extracellular	Cytoplasmic	Cytoplasmic	Cytoplasmic	Cytoplasmic	-	-	Fatty acid and phospholipid metabolism	Biosynthesis
15804591	P0ACF2	NP_290632.1	Z5576	hupA	CY, Ht-2	transcriptional regulator HU subunit alpha [Escherichia coli O157:H7 EDL933]	140 / 28 / 1 / 91	9534.58	6074.1	0	0	0	2657.23	13997.1	512.235	12373.5	2105.87	2911.27	0	2795.29	3618.88	Cytoplasmic	Cytoplasm	90	Cytoplasmic	Cytoplasmic	Cytoplasmic	Periplasmic	Cytoplasmic	-	-	DNA metabolism	Chromosome-associated proteins
15803443	Q8XD29	NP_289476.1	Z4245	pepP	CY, Ho-4	proline aminopeptidase P II [Escherichia coli O157:H7 EDL933]	141 / 108 / 335 / 694	49815.5	5143.31	2367.69	771.862	0	4043.17	4444.58	7907.97	3868.57	6526.17	1109.32	6364.14	464.867	3584.3	Cytoplasmic	Cytoplasm	441	Cytoplasmic	Cytoplasmic	Cytoplasmic	Cytoplasmic	Cytoplasmic	-	-	Protein fate	Degradation of proteins, peptides, and glycopeptides
15800764	Q8XEB4	NP_286778.1	Z1248	pflB	CY, Ho-2	formate acetyltransferase 1 [Escherichia coli O157:H7 EDL933]	142 / 70 / 779 / 30	85346.8	5779.57	369.526	406.152	774.303	5491.34	1942.27	4824.6	1207.54	5500.12	5424.79	6704.45	3694.09	3509.9	Cytoplasmic	Cytoplasm	760	Cytoplasmic	Cytoplasmic	Cytoplasmic	Cytoplasmic	Cytoplasmic	-	-	Energy metabolism	Fermentation
15804299	P65625	NP_290338.1	Z5197	yidC	IM, Ht-9	inner membrane protein translocase component YidC [Escherichia coli O157:H7 EDL933]	143 / 644 / 1079 / 814	61537.7	2937.31	2704.35	4953.98	3642.86	1522.66	5584.19	3695.07	4970.95	692.188	5068.2	1817.26	3784.89	3447.83	Cytoplasmic Membrane	Inner membrane	548	Inner Membrane	Periplasmic	Periplasmic	Periplasmic	Inner Membrane	-	-	Cell envelope	Other
15800144	P61717	NP_286156.1	Z0516	ribH	CY, Ho-60	riboflavin synthase subunit beta [Escherichia coli O157:H7 EDL933]	144 / 107 / 190 / 310	16155.8	0	0	0	5768.05	0	0	968.585	0	5311.22	11034.2	6474.19	11557.8	3426.17	Unknown	Cytoplasm	156	Cytoplasmic	Cytoplasmic	Cytoplasmic	Cytoplasmic	Cytoplasmic	-	-	Biosynthesis of cofactors, prosthetic groups, and carriers	Riboflavin, FMN, and FAD
15801753	P0A4P7	NP_287771.1	Z2335	ynaF	CY, Ho-2	nucleotide binding filament protein YnaF [Escherichia coli O157:H7 EDL933]	145 / 173 / 28 / 94	18444.6	7547.1	758.337	0	4254.52	1594.01	2371.57	958.422	1286.52	6093.98	2959.59	5305.96	7577.81	3392.32	Cytoplasmic	Cytoplasm	144	Unknown	Cytoplasmic	Cytoplasmic	Cytoplasmic	Cytoplasmic	-	-	Unknown function	General
15803609	Q8XAN5	NP_289642.1	Z4420	rpoD	CY, Ht-5	RNA polymerase sigma factor RpoD [Escherichia coli O157:H7 EDL933]	146 / 209 / 963 / 600	70204.5	5830.37	3914.13	2663.19	1673.81	3515.52	4618.44	3735.14	3882.85	4315.48	873.268	4508.93	1117.97	3387.43	Cytoplasmic	Cytoplasm	613	Cytoplasmic	Cytoplasmic	Cytoplasmic	Cytoplasmic	Cytoplasmic	-	-	Regulatory functions	Other
15803545	Q8X529	NP_289578.1	Z4354	yghZ	IM	L-glyceraldehyde 3-phosphate reductase [Escherichia coli O157:H7 EDL933]	147 / 427 / - / -	38804.33*	6421.53	4223.02	5028.38	2528.25	1206.85	782.113	6731.77	1293.62	6984.05	1648.82	2128.33	1266.25	3353.58	Unknown	Inner membrane	346	Unknown	X	Cytoplasmic	Cytoplasmic	Cytoplasmic	-	-	Energy metabolism	Electron transport
15802128	P0A7L5	NP_288150.1	Z2745	rplT	CY, 50S Rib	50S ribosomal protein L20 [Escherichia coli O157:H7 EDL933]	148 / 541 / 1141 / 130	13496.4	6394.1	1219.71	0	2752.92	7358.89	6216.13	0	5260.23	994.482	2298.49	3708.29	3678.19	3323.45	Cytoplasmic	Cytoplasm	118	Cytoplasmic	Cytoplasmic	Cytoplasmic	Extracellular	Cytoplasmic	-	-	Protein synthesis	Ribosomal proteins: synthesis and modification
15804098	Q8XDP2	NP_290137.1	Z4977	yiaD	L-OM	putative outer membrane lipoprotein [Escherichia coli O157:H7 EDL933]	149 / - / 1096 / 546	22196.2	969.396	8236.53	8229.91	4706.94	0	5903.46	1362.34	8258.1	0	699.533	1503.59	0	3322.48	Outer Membrane	Outer membrane	219	Outer Membrane	Extracellular	Extracellular	Extracellular	Outer Membrane	-	-	Regulatory functions	Other
161367548	P58473	NP_289080.2	Z3790	pepB	CY, Ho-6	aminopeptidase B [Escherichia coli O157:H7 EDL933]	150 / 102 / 368 / 569	46254.3	4835.73	0	0	1753.59	2008.96	1099.68	8004.24	957.162	4844.12	5123.4	5117.51	6090.55	3319.58	Cytoplasmic	Cytoplasm	427	Cytoplasmic	Cytoplasmic	Cytoplasmic	Periplasmic	Cytoplasmic	-	-	Protein fate	Degradation of proteins, peptides, and glycopeptides
15804100	P0ADK2	NP_290139.1	Z4979	yiaF	L (IM or OM)	hypothetical protein Z4979 [Escherichia coli O157:H7 EDL933]	151 / 657 / - / 1377	30157.4	4649.13	6114.85	2800.11	3660.86	1728.44	2869.66	4177.49	4995.52	2528.19	1909.97	3081.78	1045.55	3296.8	Unknown	Periplasm	236	Unknown	Periplasmic	Periplasmic	Periplasmic	Extracellular	-	-	Cell envelope	Other
15802016	P0AB69	NP_288037.1	Z2597	pntB	IM, Ht-4	pyridine nucleotide transhydrogenase [Escherichia coli O157:H7 EDL933]	152 / 791 / - / 685	48721.2	3645.82	396.086	500.42	6279.94	0	6301.05	0	6855.55	0	5242.25	5639	4474.13	3277.85	Cytoplasmic Membrane	Inner membrane	462	Inner Membrane	Cytoplasmic	Cytoplasmic	Cytoplasmic	Inner Membrane	-	-	Central intermediary metabolism	Other
15803039	Q7ABM8	NP_289069.1	Z3779	rodZ (yfgA)	IM, Ho-Mu	rod shape-determining membrane protein [Escherichia coli O157:H7 EDL933]	153 / 704 / 469 / 430	36278.71*	4242.9	4340.43	1590.21	2923.36	0	5703.43	1976.84	5762.1	2392.74	3050.39	2916.67	4339.05	3269.84	Unknown	Cytoplasm	337	Extracellular	X	Cytoplasmic	Periplasmic	Inner Membrane	-	-	Energy metabolism	Electron transport
15801003	Q8XEG0	NP_287019.1	Z1513	putA	CY/IM, Ho-2	trifunctional transcriptional regulator/proline dehydrogenase/pyrroline-5-carboxylate dehydrogenase [Escherichia coli O157:H7 EDL933]	154 / 567 / 1383 / 607	143771.12*	4539.72	3388.91	1758.94	4226.85	2744.02	3710.93	2658.2	3806.78	3892.09	2469.89	2846.59	3161.98	3267.08	Cytoplasmic	Cytoplasm	1320	Cytoplasmic	X	Cytoplasmic	Cytoplasmic	Cytoplasmic	-	-	Energy metabolism	Amino acids and amines
15802131	Q8XE27	NP_288153.1	Z2748	thrS	CY, Ho-2	threonyl-tRNA synthetase [Escherichia coli O157:H7 EDL933]	155 / 316 / 684 / 202	74025.6	3734.98	1637.5	1498.04	4411.55	3041.75	3227.57	3107.48	1337.75	1805.4	4091.77	5776.9	4583.55	3187.86	Cytoplasmic	Cytoplasm	642	Cytoplasmic	Cytoplasmic	Cytoplasmic	Cytoplasmic	Cytoplasmic	-	-	Protein synthesis	tRNA aminoacylation
15804483	Q8X8B7	NP_290523.1	Z5436	fdoG	PP/IM, Ht-3	formate dehydrogenase-O, major subunit [Escherichia coli O157:H7 EDL933]	156 / 477 / 1418 / 1307	112713.63*	3382.41	2595.12	3422.8	4288.09	889.954	3156.73	2931.21	2544.09	2231.74	4571.68	3138.95	4731.99	3157.06	Periplasmic	Periplasm	1016	periplasm	X	Periplasmic	Periplasmic	Periplasmic	-	-	Energy metabolism	Anaerobic
15804329	Q8XEG2	NP_290368.1	Z5227	glmS	CY, Ho-2	D-fructose-6-phosphate amidotransferase [Escherichia coli O157:H7 EDL933]	157 / 200 / 379 / 578	66905.9	2464.25	566.748	620.49	2037.45	971.397	2768.32	3961.07	2085.19	4690.21	4783.45	4573.76	7938.31	3121.72	Cytoplasmic	Cytoplasm	609	Cytoplasmic	Cytoplasmic	Cytoplasmic	Cytoplasmic	Cytoplasmic	-	-	Central intermediary metabolism	Amino sugars
15802830	Q8XCX2	NP_288857.1	Z3542	nuoG	CY/IM, Ht-13	NADH dehydrogenase subunit G [Escherichia coli O157:H7 EDL933]	158 / 167 / 624 / 200	100544	2762.5	1413	465.868	3045.39	241.314	636.397	3732.58	1558.37	5842.07	6090.62	5127.32	6271.73	3098.93	Cytoplasmic	Cytoplasm	908	periplasm	Cytoplasmic	Cytoplasmic	Cytoplasmic	Cytoplasmic	-	-	Energy metabolism	Aerobic
15801918	Q8X7B5	NP_287939.1	Z2551	trpA	CY, Ht-4	tryptophan synthase subunit alpha [Escherichia coli O157:H7 EDL933]	159 / 183 / 263 / 133	28724	10382.9	0	0	3110.36	8908.28	2340.61	0	2971.02	0	3570.06	4189.37	1661.98	3094.55	Cytoplasmic	Cytoplasm	268	Cytoplasmic	Cytoplasmic	Cytoplasmic	Cytoplasmic	Cytoplasmic	-	-	Amino acid biosynthesis	Aromatic amino acid family
15800355	Q8XBN9	NP_286367.1	Z0788	lptE (rlpB)	L (IM or OM), Ht-2	OM lipopolysaccharide assembly complex protein LptE [Escherichia coli O157:H7 EDL933]	160 / 506 / 830 / 567	21317.5	3065.75	4704.33	2585.3	2464.36	3360.99	3973.89	3213.87	4803.99	1944.62	1836.74	2370.9	2351.42	3056.35	Outer Membrane	Inner membrane	193	Unknown	Periplasmic	Periplasmic	Periplasmic	Outer Membrane	-	-	Cell envelope	Other
15804764	P0ABC5	NP_290805.1	Z5782	hflC	IM, Ht-18	FtsH protease regulator HflC [Escherichia coli O157:H7 EDL933]	161 / 854 / 1269 / 554	37648.3	2704.65	2853.28	3706.28	4192.89	697.661	4382.27	472.505	6039.36	857.271	3159.77	3660.37	3734.02	3038.36	Cytoplasmic	Extracellular	334	Unknown	Cytoplasmic	Cytoplasmic	Cytoplasmic	Inner Membrane	-	-	Protein fate	Degradation of proteins, peptides, and glycopeptides
15801333	Q8X722	NP_287350.1	Z1865	icdA	CY, Ho-2	isocitrate dehydrogenase [Escherichia coli O157:H7 EDL933]	162 / 2 / 22 / 41	45769.1	4820.36	3698.37	2567.33	1922.82	3671.39	2630.84	1241.15	1669.71	2253.41	4742.33	3531.63	3502.61	3020.99	Cytoplasmic	Cytoplasm	416	Cytoplasmic	Cytoplasmic	Cytoplasmic	Cytoplasmic	Cytoplasmic	-	-	Energy metabolism	TCA cycle
15803639	P64583	NP_289672.1	Z4452	yqjD	IM, new C-term TMD	conserved protein YqjD [Escherichia coli O157:H7 EDL933]	163 / 619 / - / 639	11051	2157.55	1666.53	880.409	1925.51	1350.33	3754.04	2277.05	4084.4	6806.22	2335.39	5039.4	3958.01	3019.57	Unknown	Cytoplasm	101	Unknown	Cytoplasmic	Cytoplasmic	Cytoplasmic	Cytoplasmic	-	-	Hypothetical proteins	Conserved
15804482	Q8X8B8	NP_290522.1	Z5435	fdoH	IM, Ht-3	formate dehydrogenase-O, iron-sulfur subunit [Escherichia coli O157:H7 EDL933]	164 / 465 / 1245 / 1132	33085.8*	2913.72	5588.8	4914.19	4015.11	600.532	2517.88	1357.55	4109.19	3080.93	3491.31	0	3575.7	3013.74	Cytoplasmic Membrane	Inner membrane	300	Inner Membrane	X	Cytoplasmic	Cytoplasmic	Cytoplasmic	-	-	Energy metabolism	Anaerobic
15804956	P0ABP9	NP_290998.1	Z5986	deoD	CY, Ho-6	purine nucleoside phosphorylase [Escherichia coli O157:H7 EDL933]	165 / 92 / 188 / 649	25948.9	1296.21	1326.81	339.896	1191.51	5687.58	0	3323.6	0	4388.55	7148.85	4680.81	6764.56	3012.36	Cytoplasmic	Cytoplasm	239	Cytoplasmic	Cytoplasmic	Cytoplasmic	Cytoplasmic	Cytoplasmic	-	-	Purines, pyrimidines, nucleosides, and nucleotides	Salvage of nucleosides and nucleotides
15803597	P0ADU0	NP_289630.1	Z4408	ygiM	IM	putative signal transduction protein YgiM [Escherichia coli O157:H7 EDL933]	166 / 801 / - / 1415	23081.29*	4597.75	1567.81	2154.01	4223.81	2688.01	4414.59	1428.11	4803.08	1944.64	2570.95	2370.45	3291.36	3004.55	Unknown	Inner membrane	206	Unknown	X	Periplasmic	Periplasmic	Inner Membrane	-	-	Hypothetical proteins	Conserved
15804799	P0AAE1	NP_290840.1	Z5819	cycA	IM	D-alanine/D-serine/glycine permease [Escherichia coli O157:H7 EDL933]	167 / 715 / 1131 / 473	51657.8	2575.73	2634.93	2172.07	3549.36	3388.53	2967.44	1800.11	4036.13	2152.25	3086.32	5311.84	2364.76	3003.29	Cytoplasmic Membrane	Inner membrane	470	Inner Membrane	Cytoplasmic	Cytoplasmic	Cytoplasmic	Inner Membrane	-	-	Transport and binding proteins	Amino acids, peptides and amines
15800112	Q8XEB1	NP_286124.1	Z0482	proC	CY, Ho-10	pyrroline-5-carboxylate reductase [Escherichia coli O157:H7 EDL933]	168 / 323 / 361 / 1029	28143.8	9321.07	0	0	916.636	9634.79	2876.71	0	2503.89	4223.99	1914.65	2058.53	2451.16	2991.79	Cytoplasmic	Cytoplasm	269	Cytoplasmic	Cytoplasmic	Cytoplasmic	Cytoplasmic	Cytoplasmic	-	-	Amino acid biosynthesis	Glutamate family
15800169	Q8XE60	NP_286181.1	Z0545	lon	CY, Ho-4	DNA-binding ATP-dependent protease La [Escherichia coli O157:H7 EDL933]	169 / 306 / 276 / 298	89206.54*	3187.4	531.63	584.322	2291.6	0	3712.42	1840.18	2215	4923.59	6077.58	5787.34	4719.38	2989.2	Cytoplasmic	Cytoplasm	799	Cytoplasmic	X	Cytoplasmic	Cytoplasmic	Cytoplasmic	-	-	Protein fate	Degradation of proteins, peptides, and glycopeptides
15804373	P0AG32	NP_290413.1	Z5293	rho	CY, Ho-6	transcription termination factor Rho [Escherichia coli O157:H7 EDL933]	170 / 347 / 375 / 197	47010.93*	4695.19	1327.18	1666.94	4086.3	2275.67	4484.42	2935.94	3252.7	1881.33	3197.89	3057.71	2956.77	2984.84	Cytoplasmic	Inner membrane	419	Cytoplasmic	X	Cytoplasmic	Cytoplasmic	Cytoplasmic	-	-	Transcription	Transcription factors
15804023	Q8X5R7	NP_290059.1	Z4886	yhiI	IM	predicted HlyD family secretion protein YhiI [Escherichia coli O157:H7 EDL933]	171 / 593 / 1056 / 1195	38832.45*	2226.72	4057.51	5163.83	2876.64	1830.87	4329.47	2917.87	4972.16	2119.05	2001.09	1722.03	1537.09	2979.53	Cytoplasmic Membrane	Inner membrane	355	Inner Membrane	X	Cytoplasmic	Cytoplasmic	Inner Membrane	-	-	Energy metabolism	Electron transport
15801004	Q8XAT3	NP_287020.1	Z1515	putP	IM	major sodium/proline symporter [Escherichia coli O157:H7 EDL933]	172 / 670 / - / 704	54328.1	830.32	2538.91	1417.31	4064.39	0	5097.56	2132.23	5546.16	6415.7	2423.42	1298.33	3878.12	2970.2	Cytoplasmic Membrane	Inner membrane	502	Inner Membrane	Cytoplasmic	Cytoplasmic	Cytoplasmic	Inner Membrane	-	-	Transport and binding proteins	Cations and iron carrying compounds
15804436	Q8X8I2	NP_290476.1	Z5367	fadB	CY, Ht-4	multifunctional fatty acid oxidation complex subunit alpha [Escherichia coli O157:H7 EDL933]	173 / 390 / 715 / 283	79546.48*	4547.55	747.655	958.431	3245.17	3418.62	3929.75	2270.12	4275.57	2472.95	3152.64	3014.44	3438.12	2955.92	Cytoplasmic	Cytoplasm	729	Unknown	X	Cytoplasmic	Cytoplasmic	Cytoplasmic	-	-	Fatty acid and phospholipid metabolism	Degradation
161367474	Q8X762	NP_290582.2	Z5500	gldA	CY, Ho-8	glycerol dehydrogenase [Escherichia coli O157:H7 EDL933]	174 / 317 / 841 / 1578	38726.6	2571.66	0	0	4429.69	0	0	5391.8	0	5710.4	3697.73	6960.78	6509.09	2939.26	Cytoplasmic	Cytoplasm	380	Unknown	Cytoplasmic	Cytoplasmic	Cytoplasmic	Cytoplasmic	-	-	Central intermediary metabolism	Other
15804830	Q8XCE0	NP_290871.1	Z5850	treB	IM, Ht-6	trehalose(maltose)-specific PTS system components IIBC [Escherichia coli O157:H7 EDL933]	175 / 787 / - / 395	51161.87*	4801.94	537.605	0	4631.96	3777.47	4149.58	770.394	4514.75	0	3452.31	0	7955.44	2882.62	Cytoplasmic Membrane	Inner membrane	473	Inner Membrane	X	Cytoplasmic	Cytoplasmic	Inner Membrane	-	-	Transport and binding proteins	Carbohydrates, organic alcohols, and acids
15802088	P0AD62	NP_288110.1	Z2704	pykF	CY, Ho-4	pyruvate kinase [Escherichia coli O157:H7 EDL933]	176 / 136 / 1362 / 1219	50727.5	4431.57	340.007	1307.98	610.671	3206.5	0	5110.23	0	9559.2	1274.41	7197.03	1427.58	2872.1	Cytoplasmic	Cytoplasm	470	Cytoplasmic	Cytoplasmic	Cytoplasmic	Cytoplasmic	Cytoplasmic	-	-	Energy metabolism	Glycolysis/gluconeogenesis
15803119	P0AC04	NP_289150.1	Z3889	yfiO	L-OM, Ht-5	outer membrane protein assembly complex subunit YfiO [Escherichia coli O157:H7 EDL933]	177 / 353 / - / 1302	27828.2	5374.46	2854.73	695.1	1709.08	2717.22	6430.6	4045.01	1554.78	1047.47	1783.34	3196.23	2283.06	2807.59	Outer Membrane	Outer membrane	245	Extracellular	Periplasmic	Periplasmic	Periplasmic	Periplasmic	-	-	Unclassified	Role category not yet assigned
15801328	Q8X737	NP_287345.1	Z1860	purB	CY	adenylosuccinate lyase [Escherichia coli O157:H7 EDL933]	178 / 397 / 1366 / 966	51567.9	3911.99	2201.05	1319.57	1617.22	2401.69	3380.54	4374.39	3678.03	3971.03	1499.99	3630.41	1440.23	2785.51	Cytoplasmic	Cytoplasm	456	Cytoplasmic	Cytoplasmic	Cytoplasmic	Cytoplasmic	Cytoplasmic	-	-	Purines, pyrimidines, nucleosides, and nucleotides	Purine ribonucleotide biosynthesis
15803832	P0AG57	NP_289866.1	Z4675	rplF	CY, 50S Rib	50S ribosomal protein L6 [Escherichia coli O157:H7 EDL933]	179 / 289 / 80 / 20	18903	2049.55	742.849	862.883	350.954	2695.24	885.558	0	1445.23	7801.82	4052.14	7132.61	5187.6	2767.2	Unknown	Cytoplasm	177	Cytoplasmic	Cytoplasmic	Periplasmic	Periplasmic	Cytoplasmic	-	-	Protein synthesis	Ribosomal proteins: synthesis and modification
15803871	P0ACK0	NP_289905.1	Z4718	crp	CY, Ho-2	cAMP-regulatory protein [Escherichia coli O157:H7 EDL933]	180 / 298 / 429 / 95	23639.7	5506.68	0	0	290.629	3343.56	3660.45	855.428	2787.8	6987.23	2131.75	5241.35	1949.36	2729.52	Cytoplasmic	Cytoplasm	210	Cytoplasmic	Cytoplasmic	Cytoplasmic	Cytoplasmic	Cytoplasmic	-	-	Regulatory functions	Other
15802506	Q8X8S6	NP_288532.1	Z3189	wzzB	IM, Ho-2	regulator of length of O-antigen component of lipopolysaccharide chains [Escherichia coli O157:H7 EDL933]	181 / 1021 / - / 1094	37810.1	0	7013.54	5299.72	1574.59	3006.18	1974.85	1594.91	2685.8	0	2875.26	649.855	5784.34	2704.92	Cytoplasmic Membrane	Inner membrane	337	Inner Membrane	Periplasmic	Cytoplasmic	Cytoplasmic	Inner Membrane	-	-	Cell envelope	Other
15801467	P0A9Q8	NP_287484.1	Z2016	adhE	CY, Ho-40	bifunctional acetaldehyde-CoA/alcohol dehydrogenase [Escherichia coli O157:H7 EDL933]	182 / 356 / 1134 / 751	96171.02*	3380.94	1414.91	905.444	2011.82	2628.27	2523.23	2040.65	3034.25	2924.97	3204.1	3803.14	3960.48	2652.68	Cytoplasmic	Cytoplasm	891	Unknown	X	Cytoplasmic	Cytoplasmic	Cytoplasmic	-	-	Energy metabolism	Fermentation
15804574	P0A7L2	NP_290615.1	Z5557	rplA	CY, 50S Rib	50S ribosomal protein L1 [Escherichia coli O157:H7 EDL933]	183 / 204 / 129 / 50	24728.6	1996.39	1225.37	334.551	825.311	4202.21	4140.42	837.138	3753.99	4053.05	2009.4	4940.52	3307.45	2635.48	Cytoplasmic	Cytoplasm	234	Cytoplasmic	Periplasmic	Cytoplasmic	Cytoplasmic	Cytoplasmic	-	-	Protein synthesis	Ribosomal proteins: synthesis and modification
15800456	P0A857	NP_286468.1	Z0908	tolB	PP, Ht-7	translocation protein TolB [Escherichia coli O157:H7 EDL933]	184 / 414 / 147 / 1055	45953.6	813.482	4060.13	3432.73	4487.51	0	2814.12	4267.33	1913.61	1626.81	2341.25	2518.44	2997.3	2606.06	Periplasmic	Periplasm	430	periplasm	Periplasmic	Periplasmic	Periplasmic	Extracellular	-	-	Transport and binding proteins	Other
15800099	Q8X5I0	NP_286111.1	Z0468	hemB	CY, Ho-8	delta-aminolevulinic acid dehydratase [Escherichia coli O157:H7 EDL933]	185 / 265 / 971 / 1048	36910.43*	3119.4	0	0	0	1637.9	0	11772.4	1160.23	6332.96	2691.19	3859.83	568.417	2595.19	Cytoplasmic	Cytoplasm	335	Cytoplasmic	X	Cytoplasmic	Cytoplasmic	Cytoplasmic	-	-	Biosynthesis of cofactors, prosthetic groups, and carriers	Heme, porphyrin, and cobalamin
15803546	P67245	NP_289579.1	Z4355	yqhA	IM	conserved inner membrane protein YqhA [Escherichia coli O157:H7 EDL933]	186 / - / - / -	18640.6	0	9582.96	12690	1152.33	0	1877.12	0	4087.08	0	1558.87	0	0	2579.03	Cytoplasmic Membrane	Inner membrane	164	Inner Membrane	Cytoplasmic	Cytoplasmic	Cytoplasmic	Inner Membrane	-	-	Hypothetical proteins	Conserved
15804423	Q8X8L3	NP_290463.1	Z5353	udp	CY, Ho-6	uridine phosphorylase [Escherichia coli O157:H7 EDL933]	187 / 8 / 207 / 211	27149	863.756	0	0	0	0	0	1191.27	0	12137.2	7502.13	2689.97	6402.88	2565.6	Cytoplasmic	Cytoplasm	253	Cytoplasmic	Cytoplasmic	Cytoplasmic	Cytoplasmic	Cytoplasmic	-	-	Purines, pyrimidines, nucleosides, and nucleotides	Salvage of nucleosides and nucleotides
15803474	Q8XCY1	NP_289507.1	Z4280	yggG	L (IM or OM)	predicted peptidase YggG [Escherichia coli O157:H7 EDL933]	188 / 559 / - / -	31826	2014.18	4017.93	3057.35	1110.11	2119.82	5569.75	3941.45	4923.66	0	1158.46	1246.01	1112.3	2522.58	Unknown	Extracellular	294	Extracellular	Periplasmic	Cytoplasmic	Periplasmic	Cytoplasmic	-	-	Protein fate	Degradation of proteins, peptides, and glycopeptides
15802028	Q8X676	NP_288049.1	Z2617	ydgA	IM, Ho-2	hypothetical protein Z2617 [Escherichia coli O157:H7 EDL933]	189 / 1068 / - / 1228	54721.1	790.369	4448.29	4889.18	3086.8	341.878	1594.13	2578.5	2229.97	1671.95	3789.32	2445.67	2183.01	2504.09	Cytoplasmic Membrane	Inner membrane	502	Unknown	Periplasmic	Periplasmic	Periplasmic	Inner Membrane	-	-	Hypothetical proteins	Conserved
15804520	P0A8R2	NP_290560.1	Z5476	rraA (menG)	CY, Ho-3, degradosome	ribonuclease activity regulator protein RraA [Escherichia coli O157:H7 EDL933]	190 / 83 / 269 / 903	17359.7	3068.23	0	0	0	4036.85	0	3216.79	2770.77	7787.12	1099.74	7119.17	824.404	2493.59	Cytoplasmic	Cytoplasm	161	Unknown	Cytoplasmic	Cytoplasmic	Cytoplasmic	Cytoplasmic	-	-	Unknown function	General
15800790	Q8XDF1	NP_286804.1	Z1276	ompF	bb-OM	outer membrane protein F [Escherichia coli O157:H7 EDL933]	191 / 825 / - / 749	39359.8	0	10192.4	9909.99	0	2687.9	0	2499.59	0	0	1469.34	740.171	1881.07	2448.37	Outer Membrane	Inner membrane	362	Outer Membrane	Extracellular	Extracellular	Extracellular	Outer Membrane	-	-	Cell envelope	Other
15803187	P0ACG2	NP_289219.1	Z3968	stpA	CY, Ho-2, Ht-2	DNA binding protein, nucleoid-associated [Escherichia coli O157:H7 EDL933]	192 / 354 / 255 / 629	15346.9	5712.74	481.404	0	0	10020.6	7130.71	0	5371.08	0	0	0	568.037	2440.38	Cytoplasmic	Cytoplasm	134	Cytoplasmic	Periplasmic	Cytoplasmic	Cytoplasmic	Cytoplasmic	-	-	Cellular processes	Pathogenesis
15803689	Q8XAA5	NP_289723.1	Z4506	yraM	L (IM or OM)	putative glycosylase [Escherichia coli O157:H7 EDL933]	193 / 672 / 1094 / 1265	72808.2	1574.74	3106.81	3414.74	2790	291.425	3888.02	2201.1	4441.68	2283.58	2264.29	2087.71	828.221	2431.03	Cytoplasmic Membrane	Inner membrane	678	Unknown	Periplasmic	Periplasmic	Periplasmic	Outer Membrane	-	-	Unclassified	Role category not yet assigned
15801917	Q8X7B6	NP_287938.1	Z2550	trpB	CY, Ht-4	tryptophan synthase subunit beta [Escherichia coli O157:H7 EDL933]	194 / 359 / 646 / 504	42995.4	2759.67	0	0	4074.46	1037.19	680.814	2204.19	735.834	5002.35	3117.77	3658.61	5805.68	2423.05	Cytoplasmic	Cytoplasm	397	Cytoplasmic	Cytoplasmic	Cytoplasmic	Cytoplasmic	Cytoplasmic	-	-	Amino acid biosynthesis	Aromatic amino acid family
15803300	P0A6Q1	NP_289333.1	Z4094	eno	CY, Ho-2, degradosome	phosphopyruvate hydratase [Escherichia coli O157:H7 EDL933]	195 / 67 / 55 / 285	45608.76*	5564.08	0	740.858	605.314	3852.58	4048.99	1023.31	2753.32	1486.33	2737	4076.51	2156.28	2420.38	Cytoplasmic	Extracellular	432	Cytoplasmic	X	Cytoplasmic	Cytoplasmic	Cytoplasmic	-	-	Energy metabolism	Glycolysis/gluconeogenesis
15802126	P67037	NP_288148.1	Z2743	pheS	CY, Ht-4	phenylalanyl-tRNA synthetase subunit alpha [Escherichia coli O157:H7 EDL933]	196 / 311 / 216 / 628	36800.3	2253.09	1440.55	587.733	2846.04	987.929	1298	2099.51	1059.17	4764.78	3239.67	3484.86	4493.1	2379.54	Cytoplasmic	Cytoplasm	327	Cytoplasmic	Cytoplasmic	Cytoplasmic	Cytoplasmic	Outer Membrane	-	-	Protein synthesis	tRNA aminoacylation
15804185	Q8XD97	NP_290224.1	Z5069	yicC	IM, TMD or L ?	conserved protein YicC [Escherichia coli O157:H7 EDL933]	197 / 385 / - / -	33157.7	1333.22	5114.49	3357.33	686.393	2192.42	224.111	5823.45	0	3383.35	479.06	4124.18	1533.86	2354.32	Cytoplasmic	Nucleoid	287	Cytoplasmic	Cytoplasmic	Cytoplasmic	Cytoplasmic	Cytoplasmic	-	-	Hypothetical proteins	Conserved
15804748	Q8XDQ0	NP_290789.1	Z5762	frdA	CY/IM, Ht-4	fumarate reductase flavoprotein subunit [Escherichia coli O157:H7 EDL933]	198 / 239 / 508 / 370	65968.1	1625.15	935.159	342.616	3639.12	798.858	327.92	2697.47	0	3608.66	3651.2	4398.84	5983.12	2334.01	Cytoplasmic Membrane	Periplasm	602	Unknown	Cytoplasmic	Periplasmic	Cytoplasmic	Outer Membrane	-	-	Energy metabolism	Anaerobic
15804730	P0ABN7	NP_290771.1	Z5743	dcuA	IM	anaerobic C4-dicarboxylate transporter [Escherichia coli O157:H7 EDL933]	199 / - / - / 1319	45749.1	0	2271.39	1114.62	2048.58	0	5138.66	570.186	0	3764.36	4275.19	4577.13	4104.86	2322.08	Cytoplasmic Membrane	Inner membrane	433	Inner Membrane	Cytoplasmic	Cytoplasmic	Cytoplasmic	Inner Membrane	-	-	Transport and binding proteins	Carbohydrates, organic alcohols, and acids
15800591	Q8X6U3	NP_286605.1	Z1066	dacC	IM	D-alanyl-D-alanine carboxypeptidase penicillin-binding protein 6 [Escherichia coli O157:H7 EDL933]	200 / 733 / - / 1416	43639.2	2864.94	1758.48	2415.96	2171.34	752.294	2228.16	2402.68	808.079	1454.09	3707.49	1772.31	5273.76	2300.8	Cytoplasmic Membrane	Cytoplasm	400	Inner Membrane	Periplasmic	Periplasmic	Periplasmic	Extracellular	-	-	Cell envelope	Biosynthesis and degradation of murein sacculus and peptidoglycan
15804747	P0AC49	NP_290788.1	Z5760	frdB	CY/IM, Ht-4	fumarate reductase iron-sulfur subunit [Escherichia coli O157:H7 EDL933]	201 / 242 / 157 / 574	27122	2105.22	1076.8	753.673	966.998	0	1212.81	0	1979.31	4452.06	3531.55	7597.67	3875.27	2295.95	Cytoplasmic Membrane	Cytoplasm	244	Inner Membrane	Cytoplasmic	Cytoplasmic	Periplasmic	Cytoplasmic	-	-	Energy metabolism	Anaerobic
15804160	Q8XEJ1	NP_290199.1	Z5043	tdh	CY, Ho-4	L-threonine 3-dehydrogenase [Escherichia coli O157:H7 EDL933]	202 / 248 / 548 / 182	37200.6	6585.19	682.481	0	907.169	0	3983.4	708.098	1224.65	1671.14	4260.92	1913.01	5454.88	2282.58	Cytoplasmic	Cytoplasm	341	Cytoplasmic	Cytoplasmic	Cytoplasmic	Cytoplasmic	Cytoplasmic	-	-	Energy metabolism	Amino acids and amines
15801646	P58229	NP_287663.1	Z2216	xasA (gadC)	IM	acid sensitivity protein, putative transporter [Escherichia coli O157:H7 EDL933]	203 / 777 / - / 962	55100.8	594.249	2752.11	4033.19	1648.14	772.8	2020.37	831.448	3937.34	1499.69	3010.78	1843.43	4403.75	2278.94	Cytoplasmic Membrane	Inner membrane	511	Inner Membrane	Cytoplasmic	Cytoplasmic	Cytoplasmic	Inner Membrane	-	-	Transport and binding proteins	Amino acids, peptides and amines
15799867	P0ABD6	NP_285879.1	Z0197	accA	CY, Ht-4, Ht-8	acetyl-CoA carboxylase carboxyltransferase subunit alpha [Escherichia coli O157:H7 EDL933]	204 / 402 / 264 / 518	35240.1	594.113	462.705	509.843	5008.29	0	1832.08	846.678	841.117	3843.03	4572.67	2342.26	6411.52	2272.03	Cytoplasmic	Cytoplasm	319	Cytoplasmic	Cytoplasmic	Cytoplasmic	Cytoplasmic	Cytoplasmic	-	-	Fatty acid and phospholipid metabolism	Biosynthesis
15802949	Q8XBL3	NP_288978.1	Z3682	ptsI	CY, Ht-Mu	phosphoenolpyruvate-protein phosphotransferase [Escherichia coli O157:H7 EDL933]	205 / 112 / 604 / 257	63531.4	2549.69	1067.03	1368.25	798.517	1219.74	1001.5	4049.8	1089.63	7058.64	159.127	6453.17	426.634	2270.14	Cytoplasmic	Cytoplasm	575	Cytoplasmic	Cytoplasmic	Cytoplasmic	Cytoplasmic	Cytoplasmic	-	-	Transport and binding proteins	Carbohydrates, organic alcohols, and acids
15800191	Q8XD55	NP_286203.1	Z0576	acrB	IM, Ht-3	acridine efflux pump [Escherichia coli O157:H7 EDL933]	206 / 755 / - / 817	113610	2745.39	1263.82	771.484	3657.05	1444.69	3954.03	1534.95	5678.63	0	3158.03	849.26	2021.48	2256.57	Cytoplasmic Membrane	Inner membrane	1049	Inner Membrane	Cytoplasmic	Cytoplasmic	Cytoplasmic	Inner Membrane	-	-	Transport and binding proteins	Other
15803718	Q8X9L0	NP_289752.1	Z4540	hflB (ftsH)	IM, Ht-18	ATP-dependent metalloprotease [Escherichia coli O157:H7 EDL933]	207 / 684 / 825 / 471	70689.2	1655.56	4572.77	3211.06	2623.58	0	3862.76	925.626	3735.72	1260.41	3332.7	512.133	1371.4	2255.31	Cytoplasmic Membrane	Inner membrane	644	Inner Membrane	Cytoplasmic	Cytoplasmic	Cytoplasmic	Inner Membrane	-	-	Cellular processes	Cell division
15804789	P0A4D1	NP_290830.1	Z5809	rpsF	CY, 30S Rib	30S ribosomal protein S6 [Escherichia coli O157:H7 EDL933]	208 / 431 / 75 / 195	15186.4	0	1866.91	1405.78	3445.77	0	0	1164.82	0	7403.34	3595.49	2496.93	5370.16	2229.1	Cytoplasmic	Cytoplasm	131	Cytoplasmic	Cytoplasmic	Cytoplasmic	Cytoplasmic	Cytoplasmic	-	-	Protein synthesis	Ribosomal proteins: synthesis and modification
15804766	P0A7D6	NP_290807.1	Z5784	purA	CY, Ho-2	adenylosuccinate synthetase [Escherichia coli O157:H7 EDL933]	209 / 99 / 196 / 401	47334.57*	5985.26	399.316	218.35	2510.17	3423.47	2923.39	1273.07	1467.99	600.955	3741.77	803.463	3113.67	2205.07	Cytoplasmic	Cytoplasm	432	Cytoplasmic	X	Cytoplasmic	Cytoplasmic	Cytoplasmic	-	-	Purines, pyrimidines, nucleosides, and nucleotides	Purine ribonucleotide biosynthesis
15803790	Q8X9B6	NP_289824.1	Z4616	accC	CY, Ho-2, Ht-8	acetyl-CoA carboxylase biotin carboxylase subunit [Escherichia coli O157:H7 EDL933]	210 / 346 / 491 / 564	49366.68*	3737.05	1146.89	1663.94	1201.59	1311.02	2798.78	1044.69	2576.6	1896.72	3761.4	3082.72	2063.74	2190.43	Cytoplasmic	Cytoplasm	449	Cytoplasmic	X	Cytoplasmic	Cytoplasmic	Cytoplasmic	-	-	Fatty acid and phospholipid metabolism	Biosynthesis
15804448	Q8X8H1	NP_290488.1	Z5398	polA	CY	DNA polymerase I [Escherichia coli O157:H7 EDL933]	211 / 373 / 1410 / 488	103142	3126.47	1744.55	1438.09	1174.99	691.295	2824.54	1688.42	2939.48	3786.75	1736.89	3297.08	1569.59	2168.18	Cytoplasmic	Cytoplasm	928	Cytoplasmic	Cytoplasmic	Cytoplasmic	Cytoplasmic	Cytoplasmic	-	-	Unknown function	General
15803458	P0C0S2	NP_289491.1	Z4261	mscS (yggB)	IM	mechanosensitive channel MscS [Escherichia coli O157:H7 EDL933]	212 / 770 / - / -	30894.8	1298.76	991.643	0	3603.52	1693.8	562.571	2284.48	1229.32	1634.84	5640.15	2022.34	4813.73	2147.93	Cytoplasmic Membrane	Inner membrane	286	Inner Membrane	Cytoplasmic	Cytoplasmic	Cytoplasmic	Inner Membrane	-	-	Transport and binding proteins	Unknown substrate
15799779	P0A9A8	NP_285791.1	Z0105	ftsZ	IM, Ht-Mu, divisome	cell division protein FtsZ [Escherichia coli O157:H7 EDL933]	213 / 394 / 596 / 144	40322.2	4491.42	2153.75	100.394	1353.88	3692.97	3153.51	1961.84	2639.25	1775.42	1614.53	1736.72	1033.47	2142.26	Cytoplasmic Membrane	Inner membrane	383	Inner Membrane	Cytoplasmic	Cytoplasmic	Cytoplasmic	Cytoplasmic	-	-	Cellular processes	Cell division
15800167	P0A6G9	NP_286179.1	Z0542	clpP	CY, Ho-14, Ht-26	ATP-dependent Clp protease proteolytic subunit [Escherichia coli O157:H7 EDL933]	214 / 40 / 389 / 273	23185.8	853.247	0	0	0	0	4411.07	0	1229.25	3318.85	3837.15	5503.42	6539.35	2141.03	Cytoplasmic	Cytoplasm	207	Cytoplasmic	Cytoplasmic	Cytoplasmic	Cytoplasmic	Cytoplasmic	-	-	Protein fate	Degradation of proteins, peptides, and glycopeptides
15803036	Q8XAA8	NP_289066.1	Z3776	(yfgM)	IM	conserved protein YfgM [Escherichia coli O157:H7 EDL933]	215 / 590 / - / 1105	22220.97*	2359.22	4525.21	994.646	1625.5	765.139	2038.71	2885.39	2772.65	1496.76	3392.27	0	2714.27	2130.81	Periplasmic	Outer membrane	206	Unknown	X	Cytoplasmic	Periplasmic	Inner Membrane	-	-	Hypothetical proteins	Conserved
15804253	Q8XC50	NP_290292.1	Z5147	nlpA	L-IM	cytoplasmic membrane lipoprotein-28 [Escherichia coli O157:H7 EDL933]	216 / 829 / 907 / 1460	29421.4	2426.74	3351.41	4092.87	3344.06	0	2516.47	2713.58	4106.89	606.111	1044.61	0	1340.14	2128.57	Cytoplasmic Membrane	Outer membrane	272	Inner Membrane	Cytoplasmic	Periplasmic	Cytoplasmic	Periplasmic	-	-	Cell envelope	Other
15799695	Q8XA65	NP_285707.1	Z0015	dnaJ	CY, Ht-3	chaperone protein DnaJ [Escherichia coli O157:H7 EDL933]	217 / 792 / 1156 / 327	41042.8	1783.47	3078.78	750.932	305.759	1756.35	2311.77	2492.84	2096	4525.96	2243.86	2068.87	2051.87	2122.2	Cytoplasmic	Cytoplasm	376	Cytoplasmic	Cytoplasmic	Cytoplasmic	Cytoplasmic	Cytoplasmic	-	-	Protein fate	Protein folding and stabilization
15803835	P62401	NP_289869.1	Z4678	rplE	CY, 50S Rib	50S ribosomal protein L5 [Escherichia coli O157:H7 EDL933]	218 / 440 / 233 / 15	20300.8	3595.42	2413.73	0	2477.25	0	3495.34	1569.21	3380.39	2851.31	1938.67	0	3722.86	2120.35	Cytoplasmic	Cytoplasm	179	Cytoplasmic	Cytoplasmic	Cytoplasmic	Cytoplasmic	Cytoplasmic	-	-	Protein synthesis	Ribosomal proteins: synthesis and modification
15802486	P0A8M8	NP_288512.1	Z3168	yeeX	CY	conserved protein YeeX [Escherichia coli O157:H7 EDL933]	219 / 297 / 327 / 902	15132	0	0	0	4468.23	0	0	0	0	0	6993.58	5015.25	8952.37	2119.12	Cytoplasmic	Periplasm	109	Cytoplasmic	Cytoplasmic	Cytoplasmic	Periplasmic	Cytoplasmic	-	-	Unknown function	General
15803282	Q8X7U1	NP_289314.1	Z4074	cysJ	CY, Ho-8, Ht-12	sulfite reductase subunit alpha [Escherichia coli O157:H7 EDL933]	220 / 383 / 1204 / 978	66379.2	2286.35	3118.55	425.713	2450.47	942.959	878.109	3018.21	716.538	2578.73	2739.58	3143.39	2805.8	2092.03	Cytoplasmic Membrane	Cytoplasm	599	Cytoplasmic	Cytoplasmic	Periplasmic	Cytoplasmic	Unknown	-	-	Energy metabolism	Aerobic
15800628	P58319	NP_286642.1	Z1104	ybjU (ltaE)	CY, Ho-4	L-threonine aldolase [Escherichia coli O157:H7 EDL933]	221 / 220 / 1321 / 1082	36486.88*	3413.5	872.99	572.64	3919.84	957.91	0	2915.74	0	1925.01	1908.74	6452.92	2094.51	2086.15	Cytoplasmic	Cytoplasm	333	Cytoplasmic	X	Cytoplasmic	Cytoplasmic	Cytoplasmic	-	-	Central intermediary metabolism	Sulfur metabolism
15800413	P0AFP8	NP_286425.1	Z0861	ybgI	CY, Ho-6	putative hydrolase-oxidase YbgI [Escherichia coli O157:H7 EDL933]	222 / 146 / 307 / 170	26891.5	2585.95	585.03	0	4751.27	632.996	2234.65	3012.1	1620.7	0	5577.44	0	3966.84	2080.58	Cytoplasmic	Periplasm	247	Unknown	Cytoplasmic	Cytoplasmic	Cytoplasmic	Cytoplasmic	-	-	Hypothetical proteins	Conserved
15799992	P0AAA2	NP_286004.1	Z0353	yagU	IM	inner membrane protein contributing to acid resistance [Escherichia coli O157:H7 EDL933]	223 / - / - / 1449	22966	3148.66	3201.07	764.349	2168.13	0	6348.78	2200.52	4933.92	0	0	0	1854.54	2051.66	Cytoplasmic Membrane	Inner membrane	204	Inner Membrane	Cytoplasmic	Cytoplasmic	Cytoplasmic	Inner Membrane	-	-	Hypothetical proteins	Conserved
15803481	P0A819	NP_289514.1	Z4287	metK	CY, Ho-4	S-adenosylmethionine synthetase [Escherichia coli O157:H7 EDL933]	224 / 341 / 654 / 291	41949.9	2016.55	1237.74	653.07	3334.57	0	2439.63	3100.49	1895.94	3070.47	2899.55	621.367	3340.84	2050.85	Cytoplasmic	Cytoplasm	384	Cytoplasmic	Cytoplasmic	Cytoplasmic	Cytoplasmic	Cytoplasmic	-	-	Central intermediary metabolism	Other
15803032	P0ADG8	NP_289062.1	Z3772	guaB	CY, Ho-4	inositol-5-monophosphate dehydrogenase [Escherichia coli O157:H7 EDL933]	225 / 114 / 788 / 808	52020.4	2649.35	225.476	558.539	0	251.732	0	5091.8	0	5462.71	2618.99	6146.63	1219.22	2018.7	Cytoplasmic	Cytoplasm	488	Cytoplasmic	Cytoplasmic	Cytoplasmic	Cytoplasmic	Cytoplasmic	-	-	Purines, pyrimidines, nucleosides, and nucleotides	Purine ribonucleotide biosynthesis
15802053	Q8X646	NP_288075.1	Z2653	ydhA	L (IM or OM)	uncharacterized protein Z2653 [Escherichia coli O157:H7 EDL933]	226 / 500 / - / 1143	9553.4	0	3916.46	0	1167.44	0	1464.2	1180	4799.31	2042.43	4893.2	0	4698.26	2013.44	Unknown	Cytoplasm	82	Unknown	Cytoplasmic	Cytoplasmic	Extracellular	Cytoplasmic	-	-	Unknown function	General
15799853	P0A7F1	NP_285865.1	Z0182	pyrH	CY, Ho-6	uridylate kinase [Escherichia coli O157:H7 EDL933]	227 / 407 / 554 / 843	25969.2	2591.1	488.45	0	1332.66	0	3918.41	2263.57	0	0	3725.69	1996.02	7750.72	2005.55	Cytoplasmic	Cytoplasm	241	Cytoplasmic	Cytoplasmic	Cytoplasmic	Cytoplasmic	Cytoplasmic	-	-	Purines, pyrimidines, nucleosides, and nucleotides	Nucleotide and nucleoside interconversions
15803891	Q8X826	NP_289927.1	Z4741	damX	IM, Ht-Mu, divisome	cell division protein DamX [Escherichia coli O157:H7 EDL933]	228 / 510 / 558 / 1185	46101.7	1174.51	5717.43	2976.69	2702.32	0	2711.4	0	2212.51	3483.61	1127.78	0	1804.93	1992.6	Unknown	Inner membrane	428	Unknown	Periplasmic	Cytoplasmic	Periplasmic	Inner Membrane	-	-	Cellular processes	Cell division
15803095	Q8XA33	NP_289126.1	Z3850	lepB	IM	signal peptidase I [Escherichia coli O157:H7 EDL933]	229 / - / - / -	35944.9	798.288	2199.09	2417.05	1974.84	531.186	2830.69	2861.63	2309.84	1035.99	3532.54	0	3391.81	1990.25	Cytoplasmic Membrane	Inner membrane	324	Inner Membrane	Cytoplasmic	Cytoplasmic	Cytoplasmic	Inner Membrane	-	-	Protein fate	Protein and peptide secretion and trafficking
15804629	Q8X5W7	NP_290670.1	Z5634	lamB	bb-OM	maltoporin [Escherichia coli O157:H7 EDL933]	230 / - / - / 533	49966.3	1584.29	4558.24	3673.66	3820.53	513.816	4107.18	1105.56	2234.31	0	2278.02	0	0	1989.63	Outer Membrane	Outer membrane	446	Inner Membrane	Extracellular	Extracellular	Extracellular	Outer Membrane	-	-	Transport and binding proteins	Carbohydrates, organic alcohols, and acids
15802593	Q8X7E7	NP_288620.1	Z3282	metG	CY, Ho-2	methionyl-tRNA synthetase [Escherichia coli O157:H7 EDL933]	231 / 302 / - / 412	76251.8	3235.47	1306.52	1283.75	1173.28	1568.17	882.922	2618.22	800.516	3025.01	2326.1	3424	2037.52	1973.46	Cytoplasmic	Cytoplasm	677	Cytoplasmic	Cytoplasmic	Cytoplasmic	Cytoplasmic	Cytoplasmic	-	-	Protein synthesis	tRNA aminoacylation
15803855	P0A7S5	NP_289889.1	Z4700	rpsL	CY, 30S Rib	30S ribosomal protein S12 [Escherichia coli O157:H7 EDL933]	232 / 352 / 452 / 110	13736.5	934.519	2887.35	2380.15	0	2441.02	811.302	0	2653.4	4775.11	667.737	4365.52	1731.69	1970.65	Cytoplasmic	Cytoplasm	124	Cytoplasmic	Periplasmic	Periplasmic	Extracellular	Unknown	-	-	Protein synthesis	Ribosomal proteins: synthesis and modification
15802125	Q8XE32	NP_288147.1	Z2742	pheT	CY, Ht-4	phenylalanyl-tRNA synthetase subunit beta [Escherichia coli O157:H7 EDL933]	233 / 176 / 765 / 776	87428.9	1176.5	644.753	115.511	2200.22	0	290.476	3758.74	0	4904.96	2658.32	5719.02	2165.68	1969.52	Cytoplasmic	Cytoplasm	795	Cytoplasmic	Cytoplasmic	Cytoplasmic	Cytoplasmic	Cytoplasmic	-	-	Protein synthesis	tRNA aminoacylation
15800252	Q8XCV9	NP_286264.1	Z0670	ylbA	CY	S-ureidoglycine aminohydrolase [Escherichia coli O157:H7 EDL933]	234 / 118 / 842 / 950	28731.4	8023.95	0	0	0	923.387	0	5607.74	0	1257.14	0	7756.66	0	1964.07	Cytoplasmic	Cytoplasm	261	Unknown	Cytoplasmic	Cytoplasmic	Cytoplasmic	Unknown	-	-	Hypothetical proteins	Conserved
15802025	Q8X769	NP_288046.1	Z2614	fumC	CY, Ho-4	fumarate hydratase [Escherichia coli O157:H7 EDL933]	235 / 208 / - / 1016	50459.9	4657.29	1099.47	885.484	0	2825.85	0	3505.24	0	2272.88	3090.75	3878.78	1318.94	1961.22	Cytoplasmic	Cytoplasm	467	Cytoplasmic	Cytoplasmic	Cytoplasmic	Cytoplasmic	Cytoplasmic	-	-	Energy metabolism	TCA cycle
15804722	P0A8N6	NP_290763.1	Z5732	lysS	CY, Ho-2	lysyl-tRNA synthetase [Escherichia coli O157:H7 EDL933]	236 / 44 / 431 / 414	57824.3	4452.97	854.123	0	1687.45	2929.08	962.004	2645.26	418.204	1695.06	1440.64	4132.45	2254.17	1955.95	Cytoplasmic	Cytoplasm	505	Cytoplasmic	Cytoplasmic	Cytoplasmic	Cytoplasmic	Cytoplasmic	-	-	Protein synthesis	tRNA aminoacylation
15800356	Q8XBN8	NP_286368.1	Z0789	leuS	CY, Ho-2	leucyl-tRNA synthetase [Escherichia coli O157:H7 EDL933]	237 / 174 / 1154 / 362	97230	2422.06	1530.37	961.172	1668.81	937.17	984.95	2887.58	803.72	2892.49	2663.19	3966.58	1704.73	1951.9	Cytoplasmic	Cytoplasm	860	Cytoplasmic	Cytoplasmic	Cytoplasmic	Cytoplasmic	Cytoplasmic	-	-	Protein synthesis	tRNA aminoacylation
15804105	P67026	NP_290144.1	Z4984	glyQ	CY, Ht-4	glycyl-tRNA synthetase subunit alpha [Escherichia coli O157:H7 EDL933]	238 / 358 / 587 / 284	34715.1	4894.76	530.324	0	1445.36	2247.25	3021.28	485.416	1972.3	2661.77	1508.16	3244.6	1287.18	1941.53	Cytoplasmic	Cytoplasm	303	Cytoplasmic	Cytoplasmic	Cytoplasmic	Cytoplasmic	Cytoplasmic	-	-	Protein synthesis	tRNA aminoacylation
15802935	Q8XBP5	NP_288963.1	Z3659	nupC	IM	permease of transport system for 3 nucleosides [Escherichia coli O157:H7 EDL933]	239 / - / 1184 / -	43488.07*	1005.57	2320.36	2561.1	2090.02	5323.51	873.244	1407.65	3797.7	1274	1455.2	0	922.352	1919.23	Cytoplasmic Membrane	Inner membrane	400	Inner Membrane	X	Cytoplasmic	Cytoplasmic	Inner Membrane	-	-	Transport and binding proteins	Nucleosides, purines and pyrimidines
15800346	P0AEB4	NP_286358.1	Z0777	dacA	IM	D-alanyl-D-alanine carboxypeptidase fraction A [Escherichia coli O157:H7 EDL933]	240 / 641 / - / 1170	44442.2	2714.76	2545.73	763.105	1870.47	0	2867.27	2318.89	2268.8	378.071	2168.61	2799.28	1943.4	1886.53	Cytoplasmic Membrane	Cytoplasm	403	Inner Membrane	Cytoplasmic	Periplasmic	Cytoplasmic	Extracellular	-	-	Cell envelope	Biosynthesis and degradation of murein sacculus and peptidoglycan
15802049	P0A9D3	NP_288071.1	Z2647	gst	CY, Ho-2	glutathionine S-transferase [Escherichia coli O157:H7 EDL933]	241 / 158 / 153 / 556	22867.5	1962.1	299.977	536.425	899.459	856.293	1695.55	0	2459.67	0	4231.9	0	9631.53	1881.08	Cytoplasmic	Cytoplasm	201	Cytoplasmic	Cytoplasmic	Cytoplasmic	Cytoplasmic	Cytoplasmic	-	-	Cellular processes	Detoxification
15803938	P0A6V0	NP_289974.1	Z4791	glgA	CY, Ho-2, Ho-4	glycogen synthase [Escherichia coli O157:H7 EDL933]	242 / 614 / 1282 / 477	52820.4	3500.77	0	0	2948.04	0	3025.18	1630.74	4388.53	1480.67	2516.84	1201.21	1790.05	1873.5	Cytoplasmic	Cytoplasm	477	Cytoplasmic	Cytoplasmic	Cytoplasmic	Cytoplasmic	Unknown	-	-	Energy metabolism	Biosynthesis and degradation of polysaccharides
15800347	Q8XBQ1	NP_286359.1	Z0778	rlpA	L (IM or OM)	rare lipoprotein A [Escherichia coli O157:H7 EDL933]	243 / 665 / - / 1390	37551.4	1366.55	4231.96	2325.71	2850.31	0	2383.24	1445.58	3889.46	863.132	2478.47	0	612.763	1870.6	Extracellular	Outer membrane	362	periplasm	Periplasmic	Periplasmic	Periplasmic	Periplasmic	-	-	Energy metabolism	Electron transport
15802825	Q8XCY3	NP_288852.1	Z3537	nuoL	IM, Ht-13	NADH dehydrogenase subunit L [Escherichia coli O157:H7 EDL933]	244 / - / - / 819	66405.7	3617.46	0	0	3738.66	0	4689.03	628.436	5101.67	0	648.234	1393.33	2496.87	1859.47	Cytoplasmic Membrane	Inner membrane	613	Inner Membrane	Cytoplasmic	Cytoplasmic	Extracellular	Inner Membrane	-	-	Energy metabolism	Aerobic
15803764	P0A7X5	NP_289798.1	Z4588	rpsI	CY, 30S Rib	30S ribosomal protein S9 [Escherichia coli O157:H7 EDL933]	245 / 640 / 983 / 44	14855.6	0	5203.99	1141.1	1402	2675.87	525.054	0	1261.39	5163.83	2925.83	0	1872.84	1847.66	Cytoplasmic	Cytoplasm	130	Cytoplasmic	Cytoplasmic	Cytoplasmic	Extracellular	Unknown	-	-	Protein synthesis	Ribosomal proteins: synthesis and modification
15803827	P0AGA4	NP_289861.1	Z4670	secY	IM, Ht-9	preprotein translocase subunit SecY [Escherichia coli O157:H7 EDL933]	246 / 906 / - / 1233	48510	1614.13	0	0	5007.13	0	2790.81	1692.96	2277.3	0	3483.13	0	5202.34	1838.98	Cytoplasmic Membrane	Inner membrane	443	Inner Membrane	Cytoplasmic	Cytoplasmic	Cytoplasmic	Inner Membrane	-	-	Protein fate	Protein and peptide secretion and trafficking
15800481	Q8X891	NP_286493.1	Z0943	ybhC	L-OM	putative pectinesterase [Escherichia coli O157:H7 EDL933]	247 / 765 / 1280 / 1310	45979.1	1761.75	6307.87	986.279	1618.47	550.298	2029.88	3283.32	1656.39	1483.73	843.973	904.759	535.044	1830.15	Outer Membrane	Outer membrane	427	Extracellular	Periplasmic	Periplasmic	Periplasmic	Outer Membrane	-	-	Cellular processes	Toxin production and resistance
15800562	P0AEQ8	NP_286574.1	Z1032	glnP	IM, Ht-5	glutamine ABC transporter permease protein [Escherichia coli O157:H7 EDL933]	248 / - / - / -	24363.5	4693.47	614.467	1544.22	2586.79	0	1622.5	1308.78	3530.22	1147.12	1349.73	0	3456.23	1821.13	Cytoplasmic Membrane	Inner membrane	219	Inner Membrane	Cytoplasmic	Cytoplasmic	Cytoplasmic	Inner Membrane	-	-	Transport and binding proteins	Amino acids, peptides and amines
15799782	Q8X996	NP_285794.1	Z0108	secA	CY/IM, Ht-9	preprotein translocase subunit SecA [Escherichia coli O157:H7 EDL933]	249 / 575 / 630 / 858	101961	1242.4	1787.29	390.177	1498.03	0	1207.82	976.82	1022.09	1576.44	3907.81	5524.68	2715.82	1820.78	Cytoplasmic	Inner membrane	901	Inner Membrane	Cytoplasmic	Cytoplasmic	Cytoplasmic	Cytoplasmic	-	-	Protein fate	Protein and peptide secretion and trafficking
15804527	P0A7N0	NP_290567.1	Z5484	rpmE	CY, 50S Rib	50S ribosomal protein L31 [Escherichia coli O157:H7 EDL933]	250 / 235 / 266 / 151	7870.77	0	0	0	0	0	0	0	0	6039.57	2565.49	11043	2190.46	1819.88	Cytoplasmic	Cytoplasm	70	Unknown	Periplasmic	Periplasmic	Periplasmic	Cytoplasmic	-	-	Protein synthesis	Ribosomal proteins: synthesis and modification
15802709	P0A6T7	NP_288736.1	Z3409	folE	CY, Ho-10	GTP cyclohydrolase I [Escherichia coli O157:H7 EDL933]	251 / 234 / 925 / 921	24829.7	711.979	540.618	0	0	0	1194.31	434.488	0	5433.47	3078.61	6623.21	3284.39	1775.09	Unknown	Cytoplasm	222	Cytoplasmic	Cytoplasmic	Cytoplasmic	Cytoplasmic	Cytoplasmic	-	-	Biosynthesis of cofactors, prosthetic groups, and carriers	Folic acid
15802963	Q8XBI8	NP_288993.1	Z3697	(yfeY)	L (IM or OM)	predicted outer membrane lipoprotein YfeY [Escherichia coli O157:H7 EDL933]	252 / - / - / 1435	20813.6	1030.56	3978.52	870.107	1429.7	1345.94	2689.69	2175.28	971.951	0	2983.64	0	3819.69	1774.59	Unknown	Extracellular	191	Unknown	Periplasmic	Periplasmic	Periplasmic	Outer Membrane	-	-	Cell envelope	Other
15800756	P0A8L3	NP_286770.1	Z1239	serS	CY, Ho-2	seryl-tRNA synthetase [Escherichia coli O157:H7 EDL933]	253 / 94 / 487 / 716	48382.1	1075.29	410.4	0	160.919	0	227.355	2630.23	0	2046.6	7150.9	2078.95	5443.32	1768.66	Cytoplasmic	Cytoplasm	430	Cytoplasmic	Cytoplasmic	Cytoplasmic	Cytoplasmic	Cytoplasmic	-	-	Protein synthesis	tRNA aminoacylation
15802870	Q8XCQ8	NP_288897.1	Z3586	fabB	CY, Ho-2	3-oxoacyl-(acyl carrier protein) synthase I [Escherichia coli O157:H7 EDL933]	254 / 389 / 403 / 10	42742.91*	0	0	0	879.481	829.091	551.524	437.218	1807.77	5692.69	3225.48	3965.25	3539.41	1743.99	Cytoplasmic	Inner membrane	406	Cytoplasmic	X	Cytoplasmic	Cytoplasmic	Cytoplasmic	-	-	Fatty acid and phospholipid metabolism	Biosynthesis
15801455	Q8XDC8	NP_287472.1	Z2001	narG	CY/IM, Ht-3	nitrate reductase 1, alpha subunit [Escherichia coli O157:H7 EDL933]	255 / 321 / 517 / 1155	140453	337.525	724.244	152.738	1382.08	0	407.819	824.638	100.943	3293.83	3562.91	5840.1	4126.88	1729.48	Cytoplasmic Membrane	Periplasm	1247	periplasm	Cytoplasmic	Cytoplasmic	Cytoplasmic	Cytoplasmic	-	-	Energy metabolism	Anaerobic
15802843	P0A6A5	NP_288870.1	Z3558	ackA	CY, Ho-2	acetate kinase [Escherichia coli O157:H7 EDL933]	256 / 81 / 175 / 520	43294.51*	0	0	0	0	0	0	1050.11	0	5178.4	3300.84	5523.25	5634.38	1723.91	Cytoplasmic	Cytoplasm	400	Cytoplasmic	X	Cytoplasmic	Cytoplasmic	Cytoplasmic	-	-	Energy metabolism	Fermentation
15799708	Q8XA49	NP_285720.1	Z0030	ileS	CY, Ho-1	isoleucyl-tRNA synthetase [Escherichia coli O157:H7 EDL933]	257 / 126 / 1445 / 1000	104321	130.848	301.899	0	1084.45	0	70.0464	2291.66	242.049	3162.12	4243.41	4463.13	4587.42	1714.75	Cytoplasmic	Cytoplasm	938	Cytoplasmic	Cytoplasmic	Cytoplasmic	Cytoplasmic	Cytoplasmic	-	-	Protein synthesis	tRNA aminoacylation
15800425	P69055	NP_286437.1	Z0875	sdhC	IM, Ht-4	succinate dehydrogenase cytochrome b556 large membrane subunit [Escherichia coli O157:H7 EDL933]	258 / - / - / -	14298.7	0	0	0	10036.7	0	0	7635.37	0	0	2610.34	0	0	1690.2	Cytoplasmic Membrane	Inner membrane	129	Inner Membrane	Cytoplasmic	Cytoplasmic	Cytoplasmic	Inner Membrane	-	-	Energy metabolism	TCA cycle
15802051	P0AGK0	NP_288073.1	Z2650	tyrS	CY, Ho-2	tyrosyl-tRNA synthetase [Escherichia coli O157:H7 EDL933]	259 / 101 / 645 / 450	48011.8	4747.47	255.032	0	0	3643.27	3418.76	552.76	3719.62	997.558	567.89	1835.73	361.835	1674.99	Cytoplasmic	Cytoplasm	424	Cytoplasmic	Cytoplasmic	Cytoplasmic	Cytoplasmic	Cytoplasmic	-	-	Protein synthesis	tRNA aminoacylation
15799715	P63737	NP_285727.1	Z0038	carB	CY, Ht-4	carbamoyl phosphate synthase large subunit [Escherichia coli O157:H7 EDL933]	260 / 195 / 1035 / 318	117851	839.384	1288.02	420.075	230.918	0	1595.77	3637.07	1736.2	1704.1	1931.09	4673.8	2008.67	1672.09	Unknown/Multiple Localization	Cytoplasm	1073	Cytoplasmic	Cytoplasmic	Cytoplasmic	Cytoplasmic	Unknown	-	-	Purines, pyrimidines, nucleosides, and nucleotides	Pyrimidine ribonucleotide biosynthesis
15802791	Q8XE13	NP_288818.1	Z3500	glpB	IM, Ht-3	anaerobic glycerol-3-phosphate dehydrogenase subunit B [Escherichia coli O157:H7 EDL933]	261 / 519 / 476 / 112	45398.7	0	0	0	4319.88	0	0	1589.71	2143.56	0	4097.8	2644.76	5246.06	1670.15	Cytoplasmic Membrane	Cytoplasm	419	Unknown	Cytoplasmic	Cytoplasmic	Cytoplasmic	Unknown	-	-	Energy metabolism	Anaerobic
15804505	P0A797	NP_290545.1	Z5460	pfkA	CY, Ho-4	6-phosphofructokinase [Escherichia coli O157:H7 EDL933]	262 / 576 / 679 / 1062	34840.7	1244.25	0	0	2002.34	1614.44	1434.62	580.296	1171	3160.72	1492.39	5137.08	1910.58	1645.64	Cytoplasmic	Cytoplasm	320	Cytoplasmic	Cytoplasmic	Cytoplasmic	Cytoplasmic	Unknown	-	-	Energy metabolism	Glycolysis/gluconeogenesis
15800135	P0AG91	NP_286147.1	Z0507	secD	IM, Ht-9	preprotein translocase subunit SecD [Escherichia coli O157:H7 EDL933]	263 / 551 / - / 1100	66629.7	2439.55	1871.72	822.893	672.34	3530.32	2318.94	852.469	3440.47	1238.18	1052.33	754.273	673.605	1638.92	Cytoplasmic Membrane	Inner membrane	615	Inner Membrane	Cytoplasmic	Cytoplasmic	Cytoplasmic	Inner Membrane	-	-	Protein fate	Protein and peptide secretion and trafficking
15804163	P67911	NP_290202.1	Z5046	rfaD	CY, Ho-5	ADP-L-glycero-D-mannoheptose-6-epimerase [Escherichia coli O157:H7 EDL933]	264 / 207 / 146 / 934	34891.8	1844.83	166.511	0	429.323	0	602.163	3610.05	0	4681.68	2387.38	5706.8	173.023	1633.48	Cytoplasmic	Cytoplasm	310	Cytoplasmic	Cytoplasmic	Cytoplasmic	Cytoplasmic	Cytoplasmic	-	-	Cell envelope	Biosynthesis and degradation of surface polysaccharides and lipopolysaccharides
15802831	Q8XCX1	NP_288858.1	Z3543	nuoF	CY/IM, Ht-13	NADH dehydrogenase I subunit F [Escherichia coli O157:H7 EDL933]	265 / 194 / 290 / 194	49318.7	2483.27	273.482	0	684.391	0	1072.96	1909.05	1634.33	1890.56	3035.05	3456.79	2971.27	1617.6	Cytoplasmic	Cytoplasm	445	periplasm	Cytoplasmic	Cytoplasmic	Cytoplasmic	Cytoplasmic	-	-	Energy metabolism	Aerobic
15802017	Q8X774	NP_288038.1	Z2600	pntA	IM, Ht-4	NAD(P) transhydrogenase subunit alpha [Escherichia coli O157:H7 EDL933]	266 / - / - / 1241	54543.3	2621.35	1436.57	883.334	1806.11	0	2912.44	522.747	2464.58	0	2692.28	565.306	3446.69	1612.62	Cytoplasmic Membrane	Inner membrane	510	Inner Membrane	Cytoplasmic	Cytoplasmic	Cytoplasmic	Inner Membrane	-	-	Energy metabolism	Electron transport
15800381	Q8X9H9	NP_286393.1	Z0826	nagE	IM, Ht-5	N-acetyl glucosamine specific PTS system component IIABC [Escherichia coli O157:H7 EDL933]	267 / - / 420 / 968	68438.75*	677.016	1412.85	776.286	5392.29	0	3182.6	642.32	4328.34	0	1985.86	0	847.44	1603.75	Cytoplasmic Membrane	Inner membrane	648	Inner Membrane	X	Cytoplasmic	Cytoplasmic	Inner Membrane	-	-	Transport and binding proteins	Carbohydrates, organic alcohols, and acids
15802999	P0A7D9	NP_289029.1	Z3735	purC	CY, Ho-3	phosphoribosylaminoimidazole-succinocarboxamide synthase [Escherichia coli O157:H7 EDL933]	268 / 157 / 301 / 118	26994	4492.17	812.42	0	280.192	3223.49	4587.7	123.98	4991.42	0	585.086	0	0	1591.37	Cytoplasmic	Cytoplasm	237	Cytoplasmic	Cytoplasmic	Cytoplasmic	Cytoplasmic	Cytoplasmic	-	-	Purines, pyrimidines, nucleosides, and nucleotides	Purine ribonucleotide biosynthesis
15799774	Q8X9Y8	NP_285786.1	Z0100	murG	IM	N-acetylglucosaminyl transferase [Escherichia coli O157:H7 EDL933]	269 / 664 / - / 1044	37799.2	3925.63	751.543	1241.41	1014.08	0	848.079	1371.76	1845.42	1241.79	2469.5	2276.91	1806.56	1566.06	Cytoplasmic Membrane	Inner membrane	355	Inner Membrane	Periplasmic	Cytoplasmic	Cytoplasmic	Cytoplasmic	-	-	Cell envelope	Biosynthesis and degradation of murein sacculus and peptidoglycan
15804333	P0ABA8	NP_290372.1	Z5231	atpG	CY/IM, Ht-9	F0F1 ATP synthase subunit gamma [Escherichia coli O157:H7 EDL933]	270 / 406 / 615 / 904	31576.2	1073.25	424.002	1321.35	491.451	693.292	925.868	500.496	1346.63	1817.57	3346.96	3877.21	2966.41	1565.37	Cytoplasmic Membrane	Inner membrane	287	Unknown	Periplasmic	Cytoplasmic	Periplasmic	Cytoplasmic	-	-	Energy metabolism	ATP-proton motive force interconversion
15802265	Q8XCJ6	NP_288289.1	Z2904	zwf	CY	glucose-6-phosphate 1-dehydrogenase [Escherichia coli O157:H7 EDL933]	271 / 281 / 427 / 1052	55730.4	1905.06	0	0	324.668	2021.89	1028.91	1497.82	1791.12	4532.36	2225.63	1473.28	1972.58	1564.44	Cytoplasmic	Cytoplasm	491	Cytoplasmic	Cytoplasmic	Cytoplasmic	Cytoplasmic	Cytoplasmic	-	-	Energy metabolism	Pentose phosphate pathway
15800491	Q8X881	NP_286503.1	Z0955	_	Ex/OM	unknown protein encoded by prophage CP-933K [Escherichia coli O157:H7 EDL933]	272 / - / - / 1629	34904.33*	1517.11	3491.96	5116.4	1045.29	0	2622.01	1059.32	1901.83	0	1090.71	0	921.492	1563.84	Unknown	Extracellular	319	Unknown	X	Periplasmic	Extracellular	Outer Membrane	-	-	Mobile and extrachromosomal element functions	Prophage functions
15800313	Q8XBU8	NP_286325.1	Z0740	cstA	IM	carbon starvation protein [Escherichia coli O157:H7 EDL933]	273 / 960 / - / 1268	75128.5	3096.21	1425.75	1567.06	2560.72	0	2141.11	0	3494.3	0	1781.33	942.838	1704.03	1559.45	Cytoplasmic Membrane	Inner membrane	701	Inner Membrane	Cytoplasmic	Cytoplasmic	Cytoplasmic	Inner Membrane	-	-	Regulatory functions	Other
161367497	Q8XDA2	NP_290219.2	Z5063	dfp	CY, Ho-12	bifunctional phosphopantothenoylcysteine decarboxylase/phosphopantothenate synthase [Escherichia coli O157:H7 EDL933]	274 / 560 / - / 1174	43436.3	1302.29	1665.28	1464.27	1495.46	0	373.547	2123.65	816.267	3304.85	1872.53	2685.67	1598.16	1558.5	Cytoplasmic	Cytoplasm	430	Cytoplasmic	Cytoplasmic	Cytoplasmic	Cytoplasmic	Unknown	-	-	Biosynthesis of cofactors, prosthetic groups, and carriers	Pantothenate and coenzyme A
15801888	P0AEK5	NP_287908.1	Z2512	fabI	CY/IM, Ho-4	enoyl-(acyl carrier protein) reductase [Escherichia coli O157:H7 EDL933]	275 / 32 / 106 / 108	27862.8	3565.96	0	0	1228.47	0	3595.09	1246.08	514.47	2262.36	3845.56	1837.57	508.013	1550.3	Cytoplasmic Membrane	Inner membrane	262	Inner Membrane	Cytoplasmic	Cytoplasmic	Cytoplasmic	Unknown	-	-	Fatty acid and phospholipid metabolism	Biosynthesis
15800692	Q8X9Q6	NP_286706.1	Z1171	terZ	CY	putative phage inhibition, colicin resistance and tellurite resistance protein [Escherichia coli O157:H7 EDL933]	276 / 287 / 35 / 216	20921.8	2819.72	1081.38	0	0	3821.27	2436.65	0	2651.08	1784.27	505.281	3270.95	0	1530.88	Cytoplasmic	Cytoplasm	193	Cytoplasmic	Extracellular	Cytoplasmic	Cytoplasmic	Cytoplasmic	-	-	Cellular processes	Adaptations to atypical conditions
15804904	Q8XB98	NP_290945.1	Z5927	iadA	CY, Ho-8	isoaspartyl dipeptidase [Escherichia coli O157:H7 EDL933]	277 / 612 / - / -	41111.3	2161.83	2653.83	2187.65	893.703	1546.87	372.843	1813.02	0	2742.52	196.796	3343.71	393.531	1525.52	Cytoplasmic	Extracellular	390	Cytoplasmic	Cytoplasmic	Cytoplasmic	Cytoplasmic	Cytoplasmic	-	-	Protein fate	Degradation of proteins, peptides, and glycopeptides
15799739	Q8XA13	NP_285751.1	Z0063	imp	bb-OM	organic solvent tolerance protein [Escherichia coli O157:H7 EDL933]	278 / - / - / 973	89656.5	1651.07	5067.07	1392.32	2275.18	0	2445.89	163.985	3548.17	897.403	0	363.394	433.488	1519.83	Outer Membrane	Outer membrane	784	Outer Membrane	Extracellular	Extracellular	Extracellular	Outer Membrane	-	-	Cellular processes	Detoxification
15801846	P0A864	NP_287864.1	Z2452	tpx	CY, Ho-2	thiol peroxidase [Escherichia coli O157:H7 EDL933]	279 / 26 / 4 / 69	17834.6	6868.6	0	0	0	1782.1	5935.48	955.067	2583.12	0	0	0	0	1510.36	Periplasmic	Periplasm	168	periplasm	Cytoplasmic	Cytoplasmic	Cytoplasmic	Unknown	-	-	Cellular processes	Detoxification
15802288	Q8XCH2	NP_288313.1	Z2929	argS	CY, Ho-2	arginyl-tRNA synthetase [Escherichia coli O157:H7 EDL933]	280 / 284 / 898 / 1215	64641.94*	1973.33	605.546	0	1087.7	0	1193.67	4137.33	927.655	2253.5	2411.8	2441.72	1089.75	1510.17	Cytoplasmic	Cytoplasm	577	Cytoplasmic	X	Cytoplasmic	Cytoplasmic	Cytoplasmic	-	-	Protein synthesis	tRNA aminoacylation
15803824	P0A7S1	NP_289858.1	Z4667	rpsK	CY, 30S Rib	30S ribosomal protein S11 [Escherichia coli O157:H7 EDL933]	281 / 589 / 566 / 29	13844.3	916.639	1033.86	731.277	633.155	0	1594.91	1924.75	4338.16	3512.81	2653.81	0	758.225	1508.13	Cytoplasmic	Cytoplasm	129	Cytoplasmic	Cytoplasmic	Cytoplasmic	Extracellular	Unknown	-	-	Protein synthesis	Ribosomal proteins: synthesis and modification
15803456	P0ADS7	NP_289489.1	Z4259	yggE	PP	putative oxidative stress response protein YggE [Escherichia coli O157:H7 EDL933]	282 / 110 / 1206 / 1567	26634.1	3389.61	0	0	0	737.261	0	4737.82	0	4300.95	387.227	4368.93	0	1493.48	Periplasmic	Cytoplasm	246	periplasm	Periplasmic	Periplasmic	Periplasmic	Periplasmic	-	-	Unknown function	General
15800320	P0AE10	NP_286332.1	Z0749	ahpC	CY, Ht-4, Ht-12	alkyl hydroperoxide reductase subunit C [Escherichia coli O157:H7 EDL933]	283 / 14 / 6 / 28	20760.6	3378.3	0	0	749.893	2962.91	1946.23	1574.01	1587.81	4286.18	0	0	1035.11	1460.04	Cytoplasmic	Cytoplasm	187	Unknown	Cytoplasmic	Cytoplasmic	Cytoplasmic	Cytoplasmic	-	-	Cellular processes	Detoxification
15804522	P0A6H6	NP_290562.1	Z5478	hslU	CY, Ho-6, Ht-24	ATP-dependent protease ATP-binding subunit [Escherichia coli O157:H7 EDL933]	284 / 270 / 321 / 126	49591.9	1223.22	1877	1237.83	1011.36	0	633.653	1538.78	229.184	2793.78	1582.96	3027.13	2251.69	1450.55	Cytoplasmic	Cytoplasm	443	Cytoplasmic	Cytoplasmic	Cytoplasmic	Cytoplasmic	Cytoplasmic	-	-	Protein fate	Protein folding and stabilization
75994466	Q7BSW5	YP_325580.1	L7020	espP	Ex/OM	secreted autotransporter serine protease [Escherichia coli O157:H7 EDL933]	285 / 1122 / 1327 / 995	141752	783.934	4285.44	3140.13	2160.53	902.4	1778.26	273.936	1566.23	0	845.402	0	1443.06	1431.61	Outer Membrane	Extracellular	1300	Extracellular/Outer Membrane	Extracellular	Extracellular	Extracellular	Extracellular	Extracellular	-	No Data	No Data
15804852	P68768	NP_290893.1	Z5872	pepA	CY, Ho-6	leucyl aminopeptidase [Escherichia coli O157:H7 EDL933]	286 / 100 / 706 / 756	54877.7	4645.32	92.0294	0	685.849	2182.57	573.462	3246.5	0	2105.1	1192.75	1539.63	915.36	1431.55	Cytoplasmic	Cytoplasm	503	Extracellular	Cytoplasmic	Cytoplasmic	Cytoplasmic	Cytoplasmic	-	-	Protein fate	Degradation of proteins, peptides, and glycopeptides
15804072	Q8X5M2	NP_290108.1	Z4942	dctA	IM	C4-dicarboxylate transporter DctA [Escherichia coli O157:H7 EDL933]	287 / 878 / - / 1068	45406.6	0	2835.11	501.035	1528.06	3889.41	0	838.941	1388.29	1876.05	1593.5	0	2721.66	1431.01	Cytoplasmic Membrane	Inner membrane	428	Inner Membrane	Cytoplasmic	Cytoplasmic	Cytoplasmic	Inner Membrane	-	-	Transport and binding proteins	Carbohydrates, organic alcohols, and acids
15801218	P69788	NP_287235.1	Z1740	ptsG	IM, Ht-6	glucose-specific PTS system IIBC components [Escherichia coli O157:H7 EDL933]	288 / - / - / 1179	50722.39*	448.09	1385.42	1515.12	2799.33	0	3120.82	313.695	4668.75	0	1622.76	0	1245.49	1426.62	Cytoplasmic Membrane	Inner membrane	477	Inner Membrane	X	Cytoplasmic	Cytoplasmic	Inner Membrane	-	-	Transport and binding proteins	Carbohydrates, organic alcohols, and acids
15799876	Q8X8W2	NP_285888.1	Z0206	proS	CY, Ho-2	prolyl-tRNA synthetase [Escherichia coli O157:H7 EDL933]	289 / 162 / 435 / 514	63649.1	1765	337.427	165.342	1824.13	0	0	1850.27	205.148	1119.77	2537.86	3071.17	4061.24	1411.45	Cytoplasmic	Cytoplasm	572	Cytoplasmic	Cytoplasmic	Cytoplasmic	Cytoplasmic	Cytoplasmic	-	-	Protein synthesis	tRNA aminoacylation
15803542	P69743	NP_289575.1	Z4351	hybO	PP/IM, Ht-4	hydrogenase 2 small subunit [Escherichia coli O157:H7 EDL933]	290 / 951 / - / 1281	39650.5	695.422	0	536.988	1930.87	0	1816.28	487.09	649.351	0	3022.16	3241.79	4507.07	1407.25	Cytoplasmic Membrane	Periplasm	372	periplasm	Cytoplasmic	Cytoplasmic	Cytoplasmic	Periplasmic	-	-	Energy metabolism	Electron transport
15800904	P0A933	NP_286920.1	Z1400	yccZ (gfcE)	L (IM or OM)	predicted polysaccharide export protein GfcE [Escherichia coli O157:H7 EDL933]	291 / 922 / - / 1036	41739.2	0	0	0	3402.22	711.757	3318.83	1148.14	6190.1	0	1183.23	0	674.956	1385.77	Outer Membrane	Outer membrane	379	Outer Membrane	Periplasmic	Cytoplasmic	Periplasmic	Unknown	-	-	Cell envelope	Biosynthesis and degradation of surface polysaccharides and lipopolysaccharides
15802829	P0AFD5	NP_288856.1	Z3541	nuoH	IM, Ht-13	NADH dehydrogenase subunit H [Escherichia coli O157:H7 EDL933]	292 / - / - / 1171	36217.9	2014.6	0	0	0	0	2634.29	1386.08	2825.41	1433.24	1461.09	0	4676.26	1369.25	Cytoplasmic Membrane	Inner membrane	325	Inner Membrane	Cytoplasmic	Cytoplasmic	Cytoplasmic	Inner Membrane	-	-	Energy metabolism	Electron transport
15803426	Q8XD57	NP_289459.1	Z4228	lysS	CY, Ho-2	lysyl-tRNA synthetase [Escherichia coli O157:H7 EDL933]	293 / 85 / 584 / 491	57629.2	1981.66	505.486	0	0	1445.73	2663.81	615.527	3105.24	3073.23	791.498	1702.8	400.897	1357.16	Cytoplasmic	Cytoplasm	505	Cytoplasmic	Cytoplasmic	Cytoplasmic	Cytoplasmic	Cytoplasmic	-	-	Protein synthesis	tRNA aminoacylation
15802243	P65813	NP_288266.1	Z2876	htpX	IM	heat shock protein HtpX [Escherichia coli O157:H7 EDL933]	294 / 630 / - / 655	31973.9*	1291.47	492.336	2182.56	897.637	1713.41	1125.59	1346.77	2449.78	1632.92	1404.96	994.934	590.556	1343.58	Cytoplasmic Membrane	Extracellular	293	Unknown	X	Cytoplasmic	Cytoplasmic	Inner Membrane	-	-	Cellular processes	Adaptations to atypical conditions
15801456	Q8XDC6	NP_287473.1	Z2002	narH	CY/IM, Ht-3	nitrate reductase 1, beta subunit [Escherichia coli O157:H7 EDL933]	295 / 276 / 638 / 1109	58078.2	214.024	823.013	542.697	886.905	0	70.4679	449.807	73.3813	4083.31	2159.36	4645.58	2172.07	1343.38	Cytoplasmic Membrane	Periplasm	512	Inner Membrane	Cytoplasmic	Periplasmic	Cytoplasmic	Cytoplasmic	-	-	Energy metabolism	Anaerobic
15803214	P0A7G8	NP_289246.1	Z4002	recA	CY	recombinase A [Escherichia coli O157:H7 EDL933]	296 / 424 / 865 / 155	38032.73*	2341.4	1796.42	658.024	1613.23	505.522	1686.1	544.631	1834.47	1980.61	1402.77	601.221	1066.62	1335.92	Cytoplasmic	Cytoplasm	353	Cytoplasmic	X	Cytoplasmic	Cytoplasmic	Cytoplasmic	-	-	DNA metabolism	DNA replication, recombination, and repair
15803317	P0ADS0	NP_289350.1	Z4112	ygdH	CY	conserved protein YdgH [Escherichia coli O157:H7 EDL933]	297 / 370 / 892 / 802	50970	2296.88	217.749	0	1978.19	1510.39	1736.73	2006.54	1349.69	0	1444.9	1332.22	2114.04	1332.28	Cytoplasmic	Cytoplasm	454	Unknown	Cytoplasmic	Cytoplasmic	Cytoplasmic	Cytoplasmic	-	-	Unknown function	Enzymes of unknown specificity
15804222	Q7DB77	NP_290261.1	Z5112	tir	Ex/OM	putative translocated intimin receptor protein [Escherichia coli O157:H7 EDL933]	298 / 436 / 697 / 396	58019.9	262.862	1276.04	1636.27	763.946	0	1676.75	2324.68	521.23	694.86	996.426	3858.62	1785.89	1316.46	Extracellular	Fimbrium	558	Unknown	Extracellular	Cytoplasmic	Periplasmic	Extracellular	-	-	Unclassified	Role category not yet assigned
15800752	P0ACJ2	NP_286766.1	Z1234	lrp	CY, Ho-8	leucine-responsive transcriptional regulator [Escherichia coli O157:H7 EDL933]	299 / 652 / 360 / 915	18886.1	586.106	0	0	204.019	0	0	0	465.71	2981.91	3801.49	2726.13	4866.72	1302.67	Cytoplasmic	Cytoplasm	164	Cytoplasmic	Cytoplasmic	Cytoplasmic	Cytoplasmic	Cytoplasmic	-	-	Central intermediary metabolism	Other
15804437	Q8X8I1	NP_290477.1	Z5369	pepQ	CY	Xaa-Pro dipeptidase [Escherichia coli O157:H7 EDL933]	300 / 134 / 446 / 206	50194.3	2096.68	311.21	0	1444.61	0	360.845	0	1577.02	1051.18	2713.29	2594.35	3473.59	1301.9	Cytoplasmic	Extracellular	443	Extracellular	Cytoplasmic	Cytoplasmic	Cytoplasmic	Cytoplasmic	-	-	Protein fate	Degradation of proteins, peptides, and glycopeptides
15802892	Q7DBB0	NP_288919.1	Z3610	vacJ (mlaA)	L (IM or OM)	putative lipoprotein MlaA [Escherichia coli O157:H7 EDL933]	301 / - / - / 1373	28006.5	2227.08	2564.08	3923.28	731.84	0	514.927	0	3142.4	0	1598.73	0	894.658	1299.75	Outer Membrane	Outer membrane	251	Outer Membrane	Periplasmic	Cytoplasmic	Periplasmic	Periplasmic	-	-	Cell envelope	Other
15803887	P67589	NP_289923.1	Z4737	trpS	CY, Ho-2	tryptophanyl-tRNA synthetase [Escherichia coli O157:H7 EDL933]	302 / 350 / 867 / 88	37422.4	3346.92	631.701	702.356	267.846	542.735	2892.23	872.594	3146.75	505.74	1804.68	448.884	383.637	1295.51	Cytoplasmic	Cytoplasm	334	Cytoplasmic	Cytoplasmic	Cytoplasmic	Cytoplasmic	Cytoplasmic	-	-	Protein synthesis	tRNA aminoacylation
15800390	Q8X9G7	NP_286402.1	Z0836	seqA	CY, Ho-4	replication initiation regulator SeqA [Escherichia coli O157:H7 EDL933]	303 / 584 / 668 / 1160	20328.7	2054.32	512.722	0	0	892.177	1182.54	476.408	1278.97	1743.7	2472.18	2124.66	2529.91	1272.3	Cytoplasmic	Cytoplasm	181	Cytoplasmic	Cytoplasmic	Cytoplasmic	Cytoplasmic	Cytoplasmic	-	-	DNA metabolism	DNA replication, recombination, and repair
15802817	P0AEH7	NP_288844.1	Z3526	elaB	IM	conserved protein ElaB [Escherichia coli O157:H7 EDL933]	304 / 886 / - / 779	11305.2	2483.08	3336.68	576.782	1539.06	0	2504.16	0	2695.88	0	2086.09	0	0	1268.48	Unknown	Cytoplasm	101	Unknown	Cytoplasmic	Cytoplasmic	Periplasmic	Cytoplasmic	-	-	Cell envelope	Other
15804600	Q8X609	NP_290641.1	Z5600	aceB	CY	malate synthase [Escherichia coli O157:H7 EDL933]	305 / 438 / 856 / 233	60273.3	1723.51	440.739	968.748	791.194	2645.29	992.913	1204.4	1620.44	728.969	1032.59	885.122	2115.09	1262.42	Cytoplasmic	Cytoplasm	533	Cytoplasmic	Cytoplasmic	Cytoplasmic	Cytoplasmic	Cytoplasmic	-	-	Energy metabolism	TCA cycle
15804791	P0A7T9	NP_290832.1	Z5811	rpsR	CY, 30S Rib	30S ribosomal protein S18 [Escherichia coli O157:H7 EDL933]	306 / 740 / 518 / 23	8987.02	2415.28	2095.84	0	0	0	5090.22	0	5537.61	0	0	0	0	1261.58	Cytoplasmic	Cytoplasm	75	Cytoplasmic	Cytoplasmic	Cytoplasmic	Extracellular	Cytoplasmic	-	-	Protein synthesis	Ribosomal proteins: synthesis and modification
15804151	P0A9D6	NP_290190.1	Z5034	cysE	CY, Ho-6, Ht-8	serine acetyltransferase [Escherichia coli O157:H7 EDL933]	307 / 371 / 567 / 792	29315.5	306.037	567.63	628.246	2062.71	0	643.723	1569.2	695.938	1899.15	5380.84	0	1377.72	1260.93	Cytoplasmic	Cytoplasm	273	Cytoplasmic	Cytoplasmic	Cytoplasmic	Cytoplasmic	Cytoplasmic	-	-	Amino acid biosynthesis	Serine family
15803726	P0AG49	NP_289760.1	Z4549	rplU	CY, 50S Rib	50S ribosomal protein L21 [Escherichia coli O157:H7 EDL933]	308 / 797 / 105 / 96	11563.9	2241.27	0	0	0	0	958.831	0	2097.24	1335.84	2435.02	1742.02	4156.46	1247.22	Cytoplasmic	Cytoplasm	103	Cytoplasmic	Cytoplasmic	Cytoplasmic	Cytoplasmic	Unknown	-	-	Protein synthesis	Ribosomal proteins: synthesis and modification
15801796	Q8X8S8	NP_287814.1	Z2386	_	CY	unknown protein encoded within prophage CP-933R [Escherichia coli O157:H7 EDL933]	309 / 503 / - / 203	52929.9	1953.63	370.416	1029.66	841.282	299.194	2321.3	510.928	1836.79	1859.17	2106.81	324.868	1117.41	1214.29	Cytoplasmic	Cytoplasm	463	Unknown	Cytoplasmic	Cytoplasmic	Cytoplasmic	Cytoplasmic	-	-	Hypothetical proteins	Conserved
15804481	P0AEL2	NP_290521.1	Z5434	fdoI	IM, Ht-3	formate dehydrogenase-O subunit gamma [Escherichia coli O157:H7 EDL933]	310 / - / - / -	24605.5	0	0	0	2504.74	0	0	3390.56	1127.78	1520.19	0	3751.88	2210.08	1208.77	Cytoplasmic Membrane	Inner membrane	211	Inner Membrane	Cytoplasmic	Cytoplasmic	Cytoplasmic	Inner Membrane	-	-	Energy metabolism	Anaerobic
15803041	P0A764	NP_289071.1	Z3781	ndk	CY, Ho-4	nucleoside diphosphate kinase [Escherichia coli O157:H7 EDL933]	311 / 23 / 20 / 43	15462.8	0	0	0	0	0	0	0	0	0	7991.09	0	6510.19	1208.44	Cytoplasmic	Cytoplasm	143	Cytoplasmic	Cytoplasmic	Cytoplasmic	Cytoplasmic	Cytoplasmic	-	-	Purines, pyrimidines, nucleosides, and nucleotides	Purine ribonucleotide biosynthesis
15801438	P61321	NP_287455.1	Z1980	lolB	L (IM or OM)	outer membrane lipoprotein LolB [Escherichia coli O157:H7 EDL933]	312 / 1015 / - / -	23549.9	811.568	2824.89	1379.94	1127.48	2151.48	1414.08	1429.54	1538.06	0	1470.58	0	341.514	1207.43	Periplasmic	Outer membrane	207	Outer Membrane	Periplasmic	Periplasmic	Periplasmic	Outer Membrane	-	-	Protein fate	Protein and peptide secretion and trafficking
15801863	P0AFN1	NP_287883.1	Z2480	pspB	IM, Ht-3	phage shock protein B [Escherichia coli O157:H7 EDL933]	313 / - / - / -	8762.79	0	1574.55	1734.49	1271.99	0	0	0	0	0	3002.5	6434.29	0	1168.15	Cytoplasmic Membrane	Inner membrane	74	Inner Membrane	Cytoplasmic	Cytoplasmic	Cytoplasmic	Inner Membrane	-	-	Cellular processes	Adaptations to atypical conditions
15800453	P0ABV0	NP_286465.1	Z0905	tolQ	IM, Ht-7	colicin uptake protein TolQ [Escherichia coli O157:H7 EDL933]	314 / - / - / 1321	25596.8	1359.38	1591.03	579.469	457.402	0	2389.32	480.333	3249.47	0	494.571	2138.27	1272.42	1167.64	Cytoplasmic Membrane	Inner membrane	230	Inner Membrane	Cytoplasmic	Cytoplasmic	Cytoplasmic	Inner Membrane	-	-	Transport and binding proteins	Other
15804413	P0A922	NP_290453.1	Z5342	pldA	bb-OM	phospholipase A [Escherichia coli O157:H7 EDL933]	315 / - / - / 1209	33161.9	0	3841.47	429.769	1724.87	0	2704.17	870.245	3530.57	0	390.246	0	452.075	1161.95	Outer Membrane	Outer membrane	289	Extracellular	Periplasmic	Extracellular	Extracellular	Outer Membrane	-	-	Central intermediary metabolism	Other
15803939	P0A6V3	NP_289975.1	Z4792	glgC	CY, Ho-4	glucose-1-phosphate adenylyltransferase [Escherichia coli O157:H7 EDL933]	316 / 123 / 833 / 1819	48695.8	0	0	0	0	0	0	2656.09	0	1446.71	2459.11	3526.97	3847.78	1161.39	Cytoplasmic	Cytoplasm	431	Cytoplasmic	Cytoplasmic	Cytoplasmic	Cytoplasmic	Cytoplasmic	-	-	Energy metabolism	Biosynthesis and degradation of polysaccharides
15802465	P0AE13	NP_288491.1	Z3139	amn	CY, Ho-6	AMP nucleosidase [Escherichia coli O157:H7 EDL933]	317 / 412 / 831 / 660	53992.8	1277.4	984.207	312.483	1473.07	0	0	2988.36	0	536.973	3074.16	1308.18	1967.79	1160.22	Cytoplasmic	Cytoplasm	484	Unknown	Cytoplasmic	Cytoplasmic	Cytoplasmic	Cytoplasmic	-	-	Central intermediary metabolism	Other
15803828	P66072	NP_289862.1	Z4671	rplO	CY, 50S Rib	50S ribosomal protein L15 [Escherichia coli O157:H7 EDL933]	318 / 696 / 248 / 75	14965.8	2411.64	335.045	919.437	1246.09	0	1036.28	1256.87	1700.56	1530.02	864.312	923.757	1647.94	1156	Cytoplasmic	Cytoplasm	144	Cytoplasmic	Cytoplasmic	Cytoplasmic	Extracellular	Cytoplasmic	-	-	Protein synthesis	Ribosomal proteins: synthesis and modification
15804178	P0A7M4	NP_290217.1	Z5061	rpmB	CY, 50S Rib	50S ribosomal protein L28 [Escherichia coli O157:H7 EDL933]	319 / 540 / 557 / 21	9006.14	0	0	0	0	0	3892.55	0	0	1325.43	1610.97	6853.54	0	1140.21	Cytoplasmic	Cytoplasm	78	Unknown	Cytoplasmic	Cytoplasmic	Extracellular	Cytoplasmic	-	-	Protein synthesis	Ribosomal proteins: synthesis and modification
15801210	Q8X8I5	NP_287227.1	Z1732	fabG	CY, Ho-4	3-ketoacyl-(acyl-carrier-protein) reductase [Escherichia coli O157:H7 EDL933]	320 / 380 / 84 / 528	25587.3	2556	0	0	0	4197.76	3313.8	0	3605.42	0	0	0	0	1139.42	Cytoplasmic	Cytoplasm	244	Cytoplasmic	Cytoplasmic	Cytoplasmic	Cytoplasmic	Cytoplasmic	-	-	Fatty acid and phospholipid metabolism	Biosynthesis
15803057	P0A6B9	NP_289087.1	Z3797	iscS (yfhO)	CY, Ho-2, Ht-Mu	cysteine desulfurase [Escherichia coli O157:H7 EDL933]	321 / 223 / 370 / 505	46059.9	515.896	0	0	563.079	0	0	0	0	341.438	4504.52	3370.73	4262.37	1129.84	Cytoplasmic	Cytoplasm	404	Cytoplasmic	Cytoplasmic	Cytoplasmic	Cytoplasmic	Cytoplasmic	-	-	Biosynthesis of cofactors, prosthetic groups, and carriers	Other
15799714	P0A6F2	NP_285726.1	Z0037	carA	CY, Ht-4	carbamoyl phosphate synthase small subunit [Escherichia coli O157:H7 EDL933]	322 / 295 / 504 / 516	41429.4	0	329.25	0	0	0	2632.17	1216.43	407.479	2208.54	1251.36	4711.22	799.16	1129.63	Cytoplasmic	Cytoplasm	382	Cytoplasmic	Cytoplasmic	Cytoplasmic	Cytoplasmic	Cytoplasmic	-	-	Purines, pyrimidines, nucleosides, and nucleotides	Pyrimidine ribonucleotide biosynthesis
15804338	P0AB99	NP_290377.1	Z5236	atpB	IM, Ht-13	F0F1 ATP synthase subunit A [Escherichia coli O157:H7 EDL933]	323 / - / - / 720	30302.3	0	0	0	6558.39	0	0	0	0	0	6844.05	0	0	1116.87	Cytoplasmic Membrane	Inner membrane	271	Inner Membrane	Cytoplasmic	Cytoplasmic	Cytoplasmic	Inner Membrane	-	-	Energy metabolism	ATP-proton motive force interconversion
15803594	Q7AAQ7	NP_289627.1	Z4405	rfaE	CY, Ho-2	bifunctional heptose 7-phosphate kinase/heptose 1-phosphate adenyltransferase [Escherichia coli O157:H7 EDL933]	324 / 518 / 797 / 339	51062.6	2877.92	399.98	0	1802.63	1030.92	2034.78	914.232	1967.86	0	1880.96	0	481.605	1115.91	Cytoplasmic	Cytoplasm	477	Unknown	Cytoplasmic	Cytoplasmic	Cytoplasmic	Cytoplasmic	-	-	Energy metabolism	Electron transport
15803324	Q8X6R5	NP_289357.1	Z4119	fucI	CY, Ho-6	L-fucose isomerase [Escherichia coli O157:H7 EDL933]	325 / 591 / - / -	64960	1318.5	1770.32	275.439	454.089	0	283.165	2764.41	0	2509.51	120.623	3568.83	297.046	1113.49	Cytoplasmic	Cytoplasm	591	Cytoplasmic	Cytoplasmic	Cytoplasmic	Cytoplasmic	Cytoplasmic	-	-	Energy metabolism	Sugars
15801658	Q8XAS9	NP_287676.1	Z2231	sfcA	CY, Ho-4	malate dehydrogenase [Escherichia coli O157:H7 EDL933]	326 / 259 / 538 / 209	64204.1	982.562	0	228.356	451.324	972.31	1698.15	1373.24	1847.59	0	2354.67	1519.73	1808.69	1103.05	Cytoplasmic Membrane	Cytoplasm	#N/A	Unknown	Cytoplasmic	Cytoplasmic	Cytoplasmic	Cytoplasmic	-	-	Energy metabolism	Glycolysis/gluconeogenesis
15804661	Q8X5T5	NP_290702.1	Z5668	acs	CY	acetyl-CoA synthetase [Escherichia coli O157:H7 EDL933]	327 / 432 / 283 / 32	72106.8	1407	1079.18	0	807.856	0	202.278	819.433	881.903	881.758	3034.65	2176.21	1942.5	1102.73	Cytoplasmic	Cytoplasm	652	Cytoplasmic	Cytoplasmic	Cytoplasmic	Cytoplasmic	Cytoplasmic	-	-	Fatty acid and phospholipid metabolism	Biosynthesis
15803090	P0A795	NP_289121.1	Z3845	pdxJ	CY, Ho-8	pyridoxal phosphate biosynthetic protein PdxJ [Escherichia coli O157:H7 EDL933]	328 / 301 / 480 / 1205	26431.04*	1400.31	0	0	0	903.228	1209.35	3914.56	0	3553.25	0	2165.86	0	1095.55	Cytoplasmic	Cytoplasm	243	Cytoplasmic	X	Cytoplasmic	Cytoplasmic	Unknown	-	-	Biosynthesis of cofactors, prosthetic groups, and carriers	Pyridoxine
15802514	Q7DBF5	NP_288540.1	Z3198	gmd	CY, Ho-2	GDP-mannose dehydratase [Escherichia coli O157:H7 EDL933]	329 / 537 / 955 / 48	41672.7	1014.67	765.012	0	699.807	0	874.013	0	952.455	636.521	3285.97	3141.92	1402.25	1064.38	Cytoplasmic	Cytoplasm	372	Cytoplasmic	Cytoplasmic	Cytoplasmic	Cytoplasmic	Cytoplasmic	-	-	Cell envelope	Biosynthesis and degradation of surface polysaccharides and lipopolysaccharides
15803037	P60908	NP_289067.1	Z3777	hisS	CY, Ho-2	histidyl-tRNA synthetase [Escherichia coli O157:H7 EDL933]	330 / 148 / 541 / 984	47027.7	555.51	0	234.722	0	0	224.75	0	525.547	2483.68	2613.47	4325.02	1544.21	1042.24	Cytoplasmic	Cytoplasm	424	Cytoplasmic	Cytoplasmic	Cytoplasmic	Cytoplasmic	Cytoplasmic	-	-	Protein synthesis	tRNA aminoacylation
15802219	Q8XDR5	NP_288242.1	Z2849	(yeaY)	L (IM or OM)	putative outer membrane protein [Escherichia coli O157:H7 EDL933]	331 / - / - / 782	20866.3	1466.62	1127.06	0	1017.32	1042.9	3189.82	504.651	2082.31	0	1592.29	455.947	0	1039.91	Outer Membrane	Outer membrane	193	Outer Membrane	Periplasmic	Periplasmic	Periplasmic	Periplasmic	-	-	Cell envelope	Other
15802230	P69799	NP_288253.1	Z2860	manX	CY/IM, Ht-7	PTS system, mannose-specific IIAB component [Escherichia coli O157:H7 EDL933]	332 / 127 / 254 / 493	35107.96*	565.539	0	0	558.008	0	1399.71	1113.44	1903.42	2569.07	2911.27	623.628	745.261	1032.45	Cytoplasmic	Inner membrane	323	Cytoplasmic	X	Cytoplasmic	Cytoplasmic	Cytoplasmic	-	-	Transport and binding proteins	Carbohydrates, organic alcohols, and acids
15800136	P0AG95	NP_286148.1	Z0508	secF	IM, Ht-9	preprotein translocase subunit SecF [Escherichia coli O157:H7 EDL933]	333 / - / - / 853	35381.1	935.736	3613.88	0	2596.29	0	1627.81	654.621	882.518	0	2031.83	0	0	1028.56	Cytoplasmic Membrane	Inner membrane	323	Inner Membrane	Cytoplasmic	Cytoplasmic	Cytoplasmic	Inner Membrane	-	-	Protein fate	Protein and peptide secretion and trafficking
15804746	P0A8Q2	NP_290787.1	Z5759	frdC	IM, Ht-4	fumarate reductase subunit C [Escherichia coli O157:H7 EDL933]	334 / - / - / -	15014.5	800.218	2236.93	0	6030.09	0	1254.57	0	0	0	1972.37	0	0	1024.51	Cytoplasmic Membrane	Inner membrane	131	Inner Membrane	Cytoplasmic	Cytoplasmic	Cytoplasmic	Inner Membrane	-	-	Energy metabolism	Anaerobic
15800213	Q8XD24	NP_286225.1	Z0604	ybaR	IM	copper exporting ATPase [Escherichia coli O157:H7 EDL933]	335 / - / 791 / 1615	88001.6	501.807	582.99	212.608	1745.13	0	2626.5	1062.09	2143.23	0	1274.67	1175.27	932.488	1021.4	Cytoplasmic Membrane	Inner membrane	834	Inner Membrane	Cytoplasmic	Cytoplasmic	Cytoplasmic	Inner Membrane	-	-	Transport and binding proteins	Cations and iron carrying compounds
15800804	P0A7E2	NP_286820.1	Z1294	pyrD	CY/IM, Ho-2	dihydroorotate dehydrogenase 2 [Escherichia coli O157:H7 EDL933]	336 / 798 / - / 1663	36773.2	577.343	664.44	447.185	1988.95	0	1995.64	1008.73	2171.25	360.058	1245.22	428.093	1328.46	1017.95	Cytoplasmic Membrane	Cytoplasm	336	Unknown	Cytoplasmic	Cytoplasmic	Cytoplasmic	Cytoplasmic	-	-	Purines, pyrimidines, nucleosides, and nucleotides	Pyrimidine ribonucleotide biosynthesis
15803491	P64566	NP_289524.1	Z4297	yggT	IM	predicted inner membrane protein YggT [Escherichia coli O157:H7 EDL933]	337 / - / - / -	21166.5	0	0	0	1703.61	0	0	0	4634.18	0	3413.47	0	2350.9	1008.51	Cytoplasmic Membrane	Inner membrane	188	Inner Membrane	Cytoplasmic	Cytoplasmic	Cytoplasmic	Inner Membrane	-	-	Unknown function	General
15799927	P63225	NP_285939.1	Z0280	gmhA	CY, Ho-4	phosphoheptose isomerase [Escherichia coli O157:H7 EDL933]	338 / 226 / 195 / 840	20814	714	0	0	0	0	0	0	0	1935.83	3290.53	2359.71	3744.52	1003.72	Cytoplasmic	Cytoplasm	192	Cytoplasmic	Cytoplasmic	Cytoplasmic	Cytoplasmic	Cytoplasmic	-	-	Cell envelope	Biosynthesis and degradation of surface polysaccharides and lipopolysaccharides
15801898	Q8X7C8	NP_287918.1	Z2528	yciS	IM	conserved inner membrane protein YciS [Escherichia coli O157:H7 EDL933]	339 / - / - / 1165	11410.2	0	1569.43	0	0	0	3568.03	2922.96	0	0	0	0	3832.41	991.068	Cytoplasmic Membrane	Inner membrane	102	Inner Membrane	Cytoplasmic	Cytoplasmic	Cytoplasmic	Inner Membrane	-	-	Hypothetical proteins	Conserved
15804850	Q8XCB3	NP_290891.1	Z5870	valS	CY, Ho-1	valyl-tRNA synthetase [Escherichia coli O157:H7 EDL933]	340 / 184 / 969 / 932	108174	2295.79	0	0	0	669.155	551.083	2495.84	0	1780.2	1650.53	1380.91	1056.52	990.002	Cytoplasmic	Cytoplasm	951	Cytoplasmic	Cytoplasmic	Cytoplasmic	Cytoplasmic	Cytoplasmic	-	-	Protein synthesis	tRNA aminoacylation
15804552	Q8X743	NP_290593.1	Z5514	ppc	CY, Ho-4	phosphoenolpyruvate carboxylase [Escherichia coli O157:H7 EDL933]	341 / 421 / 1016 / 867	99108.69*	2031.9	623.583	100.021	1213.32	1068.7	2107.03	378.679	1910.38	687.523	486.938	418.698	748.062	981.237	Cytoplasmic	Cytoplasm	883	Cytoplasmic	X	Cytoplasmic	Cytoplasmic	Cytoplasmic	-	-	Energy metabolism	Other
161367563	P0AFF1	NP_288850.2	Z3534	nuoN	IM, Ht-13	NADH dehydrogenase subunit N [Escherichia coli O157:H7 EDL933]	342 / - / - / -	52093.8*	0	0	0	7859.04	0	0	0	0	0	2343.01	0	1484.63	973.889	Cytoplasmic Membrane	Inner membrane	485	Inner Membrane	X	Cytoplasmic	Extracellular	Inner Membrane	-	-	Energy metabolism	Aerobic
15804557	P0ACQ6	NP_290598.1	Z5519	oxyR	CY	DNA-binding transcriptional regulator OxyR [Escherichia coli O157:H7 EDL933]	343 / 404 / 490 / 238	34274.7	0	0	284.164	0	0	0	0	0	3000.76	2380.8	2926.84	3047.93	970.04	Cytoplasmic	Cytoplasm	305	Cytoplasmic	Cytoplasmic	Cytoplasmic	Cytoplasmic	Cytoplasmic	-	-	Regulatory functions	Other
15803703	Q8XA88	NP_289737.1	Z4522	mtr	IM	tryptophan permease [Escherichia coli O157:H7 EDL933]	344 / - / - / 1031	44419	1720.33	0	0	6010.7	2263.43	0	0	0	0	0	0	1583.39	964.821	Cytoplasmic Membrane	Inner membrane	414	Inner Membrane	Extracellular	Cytoplasmic	Extracellular	Inner Membrane	-	-	Transport and binding proteins	Amino acids, peptides and amines
15803846	P60725	NP_289880.1	Z4690	rplD	CY, 50S Rib	50S ribosomal protein L4 [Escherichia coli O157:H7 EDL933]	345 / 623 / 406 / 31	22085.6	1248.15	0	0	1722.54	0	2160.84	0	1175.5	0	1797.74	2898.68	573.475	964.744	Unknown	Cytoplasm	201	Cytoplasmic	Cytoplasmic	Periplasmic	Cytoplasmic	Cytoplasmic	-	-	Protein synthesis	Ribosomal proteins: synthesis and modification
15803842	P61177	NP_289876.1	Z4686	rplV	CY, 50S Rib	50S ribosomal protein L22 [Escherichia coli O157:H7 EDL933]	346 / 535 / 103 / 35	12225.8	1644.3	0	0	0	0	3552.3	0	3864.9	0	1182.15	1266.15	0	959.151	Cytoplasmic	Cytoplasm	110	Cytoplasmic	Cytoplasmic	Cytoplasmic	Cytoplasmic	Cytoplasmic	-	-	Protein synthesis	Ribosomal proteins: synthesis and modification
15804356	P0ADN4	NP_290396.1	Z5276	yifE	CY	uncharacterized protein YifE [Escherichia coli O157:H7 EDL933]	347 / 340 / 116 / 727	13133	0	0	0	0	0	0	0	0	3339.07	3315.5	3056.94	1789.99	958.458	Unknown	Cytoplasm	112	Unknown	Cytoplasmic	Cytoplasmic	Cytoplasmic	Cytoplasmic	-	-	Unknown function	General
15803082	Q8XA46	NP_289113.1	Z3835	purL	CY	phosphoribosylformylglycinamidine synthase [Escherichia coli O157:H7 EDL933]	348 / 278 / 1325 / 262	141442.84*	2266.66	306.896	336.943	91.4993	451.29	1267.41	1025.02	1253.59	337.18	1629.59	1031.13	1472.63	955.821	Cytoplasmic	Cytoplasm	1295	Cytoplasmic	X	Cytoplasmic	Cytoplasmic	Outer Membrane	-	-	Purines, pyrimidines, nucleosides, and nucleotides	Purine ribonucleotide biosynthesis
15803847	P60440	NP_289881.1	Z4691	rplC	CY, 50S Rib	50S ribosomal protein L3 [Escherichia coli O157:H7 EDL933]	349 / 495 / 247 / 111	22242.6	1027.58	0	0	707.367	0	0	0	0	3912.37	1847.29	1580.94	2364.92	953.372	Cytoplasmic	Cytoplasm	209	Cytoplasmic	Periplasmic	Cytoplasmic	Periplasmic	Unknown	-	-	Protein synthesis	Ribosomal proteins: synthesis and modification
15800533	P0AF00	NP_286545.1	Z1001	moaB	CY, Ho-6	molybdopterin biosynthesis, protein B [Escherichia coli O157:H7 EDL933]	350 / 164 / 154 / 811	18664.3	0	0	0	0	0	0	0	0	725.894	2577.82	6470.15	1633.42	950.607	Cytoplasmic	Periplasm	170	Unknown	Cytoplasmic	Cytoplasmic	Cytoplasmic	Cytoplasmic	-	-	Biosynthesis of cofactors, prosthetic groups, and carriers	Molybdopterin
15804836	P0A788	NP_290877.1	Z5856	pyrB	CY, Ho-3	aspartate carbamoyltransferase catalytic subunit [Escherichia coli O157:H7 EDL933]	351 / 273 / 511 / 1511	34473.82*	0	0	0	0	0	0	2085.43	0	453.076	2413.47	4038.42	2403.14	949.462	Cytoplasmic	Cytoplasm	311	Cytoplasmic	X	Cytoplasmic	Cytoplasmic	Cytoplasmic	-	-	Purines, pyrimidines, nucleosides, and nucleotides	Pyrimidine ribonucleotide biosynthesis
15799788	Q8X984	NP_285800.1	Z0114	guaC	CY, Ho-4	guanosine 5'-monophosphate oxidoreductase [Escherichia coli O157:H7 EDL933]	352 / 401 / 433 / 1017	37396.2	1089.64	0	0	0	0	0	0	0	6293.5	385.91	3409.58	0	931.553	Cytoplasmic	Cytoplasm	347	Cytoplasmic	Cytoplasmic	Cytoplasmic	Cytoplasmic	Cytoplasmic	-	-	Purines, pyrimidines, nucleosides, and nucleotides	Nucleotide and nucleoside interconversions
15802946	P0A6J4	NP_288975.1	Z3679	cysZ	IM	putative sulfate transport protein CysZ [Escherichia coli O157:H7 EDL933]	353 / - / - / -	29304	0	786.842	871.758	0	0	4493.13	0	4888.53	0	0	0	0	920.022	Cytoplasmic Membrane	Inner membrane	253	Inner Membrane	Cytoplasmic	Cytoplasmic	Cytoplasmic	Inner Membrane	-	-	Transport and binding proteins	Anions
15801444	Q8XDE7	NP_287461.1	Z1986	kdsA	CY, Ho-4	2-dehydro-3-deoxyphosphooctonate aldolase [Escherichia coli O157:H7 EDL933]	354 / 144 / 350 / 173	30859.5	2290.11	0	0	0	1757.42	1582.4	0	861.173	2324.68	327.908	1414.72	309.806	905.686	Cytoplasmic	Cytoplasm	284	Cytoplasmic	Cytoplasmic	Cytoplasmic	Cytoplasmic	Cytoplasmic	-	-	Cell envelope	Biosynthesis and degradation of surface polysaccharides and lipopolysaccharides
15802863	P0A9Q6	NP_288890.1	Z3578	accD	CY, Ht-4	acetyl-CoA carboxylase subunit beta [Escherichia coli O157:H7 EDL933]	355 / 381 / 315 / 837	33320.6	1689.22	0	253.218	0	0	543.78	0	0	1710.08	2671.78	2090.18	1865.7	901.997	Cytoplasmic	Cytoplasm	304	Cytoplasmic	Cytoplasmic	Cytoplasmic	Cytoplasmic	Cytoplasmic	-	-	Fatty acid and phospholipid metabolism	Biosynthesis
15801711	P64452	NP_287729.1	Z2287	ydcL	L (IM or OM)	uncharacterized lipoprotein YdcL [Escherichia coli O157:H7 EDL933]	356 / - / - / -	24426	1841.47	403.698	0	2537.55	0	1591.3	857.971	0	0	1323.9	0	2259.84	901.311	Unknown	Outer membrane	222	periplasm	Periplasmic	Periplasmic	Periplasmic	Periplasmic	-	-	Unclassified	Role category not yet assigned
75994490	Q7BSV3	YP_325604.1	L7044	etpO	L (IM or OM)	type II secretion protein [Escherichia coli O157:H7 EDL933]	357 / 956 / - / 1380	15050.9	755.938	2919.49	0	522.153	0	1972.94	1594.65	707.651	0	1641.42	0	693.381	900.636	Unknown/Multiple Localization	Inner membrane	133	Cytoplasmic	Outer Membrane	Cytoplasmic	Cytoplasmic	Periplasmic	Cytoplasmic	-	No Data	No Data
15804650	Q8X5U9	NP_290691.1	Z5657	uvrA	CY, Ht-3	excinuclease ABC subunit A [Escherichia coli O157:H7 EDL933]	358 / 639 / - / 1088	103941.4*	1680.56	752.071	58.1285	675.447	368.112	1936.33	783.001	921.696	533.101	1006.85	1516.27	515.593	895.597	Cytoplasmic	Cytoplasm	940	Cytoplasmic	X	Cytoplasmic	Cytoplasmic	Cytoplasmic	-	-	DNA metabolism	DNA replication, recombination, and repair
15802945	Q8X492	NP_288974.1	Z3678	zipA	IM, Ht-Mu, divisome	cell division protein ZipA [Escherichia coli O157:H7 EDL933]	359 / 419 / 470 / 917	36568.72*	0	0	0	866.667	0	5457.8	0	2369.06	0	0	1946.12	0	886.638	Cytoplasmic Membrane	Inner membrane	328	Inner Membrane	X	Periplasmic	Periplasmic	Inner Membrane	-	-	Cellular processes	Cell division
15802364	Q8XBB4	NP_288390.1	Z3019	yedE	IM	putative inner membrane protein YedE [Escherichia coli O157:H7 EDL933]	360 / - / - / 1510	44411.3	308.202	498.096	524.284	1977.73	0	1860.73	320.985	1349.51	859.546	514.471	1101.04	1321.23	886.319	Cytoplasmic Membrane	Inner membrane	401	Inner Membrane	Cytoplasmic	Cytoplasmic	Cytoplasmic	Inner Membrane	-	-	Unknown function	General
15802279	Q8XCI7	NP_288303.1	Z2919	aspS	CY, Ho-2	aspartyl-tRNA synthetase [Escherichia coli O157:H7 EDL933]	361 / 124 / 527 / 880	65758.19*	1256	0	0	78.0456	0	0	626.992	0	3870.41	773.991	3052.75	825.728	873.66	Cytoplasmic	Cytoplasm	590	Cytoplasmic	X	Cytoplasmic	Cytoplasmic	Cytoplasmic	-	-	Protein synthesis	tRNA aminoacylation
15803840	P0ADY9	NP_289874.1	Z4684	rplP	CY, 50S Rib	50S ribosomal protein L16 [Escherichia coli O157:H7 EDL933]	362 / 779 / 377 / 90	15280.6	2801.82	0	0	0	2423.16	1611.86	1296.02	868.426	0	660.704	0	789.28	870.939	Cytoplasmic	Cytoplasm	136	Cytoplasmic	Periplasmic	Cytoplasmic	Periplasmic	Unknown	-	-	Protein synthesis	Ribosomal proteins: synthesis and modification
15802947	P0ABK6	NP_288976.1	Z3680	cysK	CY, Ho-2, Ht-8	cysteine synthase A [Escherichia coli O157:H7 EDL933]	363 / 15 / 77 / 356	34488.3	0	583.374	0	1315.5	0	0	2134.97	0	2907.15	1372.66	1769.02	346.856	869.128	Unknown	Cytoplasm	323	Cytoplasmic	Cytoplasmic	Cytoplasmic	Cytoplasmic	Cytoplasmic	-	-	Amino acid biosynthesis	Serine family
15803128	P0A7K8	NP_289159.1	Z3900	rplS	CY, 50S Rib	50S ribosomal protein L19 [Escherichia coli O157:H7 EDL933]	364 / 505 / 295 / 40	13132.7	1933.29	0	0	0	0	0	0	0	2456.77	2087.81	2993.82	882.035	862.811	Cytoplasmic	Cytoplasm	115	Cytoplasmic	Cytoplasmic	Cytoplasmic	Extracellular	Cytoplasmic	-	-	Protein synthesis	Ribosomal proteins: synthesis and modification
15802661	Q7DBC4	NP_288688.1	Z3360	_	IM	unknown protein encoded within prophage CP-933V [Escherichia coli O157:H7 EDL933]	365 / - / - / -	19771.53*	1873.26	1916.31	0	1290.68	0	537.323	0	0	0	447.572	1930.42	2298.85	857.867	Unknown	Periplasm	183	Unknown	X	Periplasmic	Periplasmic	Inner Membrane	-	-	Energy metabolism	Electron transport
15801201	Q8X8J5	NP_287218.1	Z1722	rne	CY, Ho-4, degradosome	ribonuclease E [Escherichia coli O157:H7 EDL933]	366 / 508 / 600 / 804	118268	320.953	1991.29	1094.33	558.822	0	279.958	906.928	0	617.476	1399.45	2508.94	597.197	856.278	Cytoplasmic	Cytoplasm	1061	Cytoplasmic	Cytoplasmic	Cytoplasmic	Cytoplasmic	Cytoplasmic	-	-	Transcription	Degradation of RNA
15802207	Q8XDS8	NP_288229.1	Z2835	yoaF	L (IM or OM)	conserved outer membrane lipoprotein YoaF [Escherichia coli O157:H7 EDL933]	367 / - / - / -	8899.04	0	1356.64	0	2011.77	0	0	0	0	0	4347.44	0	2523.35	853.268	Unknown	Periplasm	84	Unknown	Periplasmic	Periplasmic	Periplasmic	Outer Membrane	-	-	Unknown function	General
15802998	P64431	NP_289028.1	Z3734	ypfJ	IM	uncharacterized protein YpfJ [Escherichia coli O157:H7 EDL933]	368 / - / 746 / -	31459	0	1529.51	1121.53	456.244	0	572.223	1858.94	2500.82	833.47	0	0	1211.72	840.371	Unknown	Inner membrane	287	Unknown	Periplasmic	Cytoplasmic	Periplasmic	Inner Membrane	-	-	Unknown function	Enzymes of unknown specificity
15804361	P0AB82	NP_290401.1	Z5281	ilvE	CY, Ho-6	branched-chain amino acid aminotransferase [Escherichia coli O157:H7 EDL933]	369 / 155 / 578 / 864	34092.3	528.519	0	0	730.281	0	402.922	3346.74	493.658	2700.57	380.7	0	1469.04	837.703	Cytoplasmic	Cytoplasm	309	Cytoplasmic	Cytoplasmic	Cytoplasmic	Cytoplasmic	Cytoplasmic	-	-	Amino acid biosynthesis	Pyruvate family
15801180	Q8X8N6	NP_287197.1	Z1700	yceB	L (IM or OM)	uncharacterized lipoprotein YceB [Escherichia coli O157:H7 EDL933]	370 / 830 / - / 1293	20469	784.928	0	0	1087.62	625.52	3414.34	1103.98	2971.85	0	0	0	0	832.354	Unknown	Cytoplasm	186	Unknown	Periplasmic	Periplasmic	Cytoplasmic	Unknown	-	-	Unknown function	General
15801220	P0ACE8	NP_287237.1	Z1742	ycfF	CY, Ho-2	purine nucleoside phosphoramidase [Escherichia coli O157:H7 EDL933]	371 / 761 / 88 / 875	13240.8	0	0	0	0	0	0	0	0	0	3442.15	4917.63	1454.06	817.821	Unknown	Cytoplasm	119	Cytoplasmic	Cytoplasmic	Cytoplasmic	Cytoplasmic	Cytoplasmic	-	-	Unknown function	General
15801407	P0A6M3	NP_287424.1	Z1948	dsbB	IM	disulfide bond formation protein B [Escherichia coli O157:H7 EDL933]	372 / - / - / 1157	20161.28*	0	2535.67	1389.09	1130.07	0	0	0	4695.6	0	0	0	0	812.536	Cytoplasmic Membrane	Inner membrane	176	Inner Membrane	X	Cytoplasmic	Cytoplasmic	Inner Membrane	-	-	Cell envelope	Surface structures
15803850	Q8X890	NP_289884.1	Z4695	bfr	CY, Ho-24	bacterioferritin, iron storage and detoxification protein [Escherichia coli O157:H7 EDL933]	373 / 595 / 479 / 385	18337.4	752.921	0	0	520.069	0	0	2118.99	0	0	2179.82	690.192	3488.3	812.525	Cytoplasmic	Cytoplasm	158	Unknown	Cytoplasmic	Cytoplasmic	Cytoplasmic	Cytoplasmic	-	-	Transport and binding proteins	Cations and iron carrying compounds
15804220	P43261	NP_290259.1	Z5110	eae	Ex/OM	intimin adherence protein [Escherichia coli O157:H7 EDL933]	374 / - / 543 / 1210	101832	287.628	2179.04	2016.86	617.948	0	1162.55	0	2108.09	0	537.333	0	825.48	811.244	Outer Membrane	Outer membrane	934	Extracellular	Extracellular	Extracellular	Extracellular	Outer Membrane	-	-	Cellular processes	Other
15800640	P0ABI1	NP_286654.1	Z1119	clpA	CY, Ho-6, Ht-24	ATP-dependent Clp protease ATP-binding subunit [Escherichia coli O157:H7 EDL933]	375 / 464 / 588 / 512	84203.7	1359.17	128.852	142.612	468.047	0	880.891	237.045	157.978	2371.33	1465.74	1839.45	625.486	806.383	Cytoplasmic	Cytoplasm	758	Extracellular	Cytoplasmic	Cytoplasmic	Cytoplasmic	Cytoplasmic	-	-	Protein fate	Degradation of proteins, peptides, and glycopeptides
15803605	Q8XBK4	NP_289638.1	Z4416	ttdT (ygjE)	IM	TtdT tartrate DASS transporter [Escherichia coli O157:H7 EDL933]	376 / 594 / 868 / 1217	52877.5	0	0	0	0	0	536.583	0	0	0	2066.61	0	6860.43	788.635	Cytoplasmic Membrane	Inner membrane	487	Inner Membrane	Periplasmic	Cytoplasmic	Cytoplasmic	Inner Membrane	-	-	Transport and binding proteins	Unknown substrate
15801470	P0AFH4	NP_287487.1	Z2020	oppB	IM, Ht-5	oligopeptide transporter permease [Escherichia coli O157:H7 EDL933]	377 / - / - / 1505	33448.34*	1958.53	0	0	2028.2	0	1695.85	0	847.634	0	2821.49	0	0	779.31	Cytoplasmic Membrane	Inner membrane	306	Inner Membrane	X	Cytoplasmic	Cytoplasmic	Inner Membrane	-	-	Protein fate	Protein and peptide secretion and trafficking
15803539	P0ACE1	NP_289572.1	Z4348	hybC	PP/IM, Ht-4	hydrogenase 2 large subunit [Escherichia coli O157:H7 EDL933]	378 / 638 / 724 / 585	62488.8	1311.47	236.61	230.893	903.603	0	282.135	916.552	304.867	831.122	1650.01	1012.91	1508.84	765.751	Cytoplasmic Membrane	Periplasm	567	Unknown	Cytoplasmic	Cytoplasmic	Cytoplasmic	Cytoplasmic	-	-	Energy metabolism	Anaerobic
15804197	Q8XCA6	NP_290236.1	Z5083	yicH	IM	conserved protein YicH [Escherichia coli O157:H7 EDL933]	379 / - / - / 1586	62287	0	1201.41	541.518	1327.33	0	1664.74	219.927	904.898	0	1846.68	0	1477.59	765.342	Unknown	Inner membrane	569	Unknown	Periplasmic	Cytoplasmic	Periplasmic	Inner Membrane	-	-	Hypothetical proteins	Conserved
15802660	Q8X3K4	NP_288687.1	Z3359	_		unknown protein encoded by prophage CP-933V [Escherichia coli O157:H7 EDL933]	380 / 335 / 238 / 494	3899.12	0	0	0	1756.11	0	0	0	0	3208.07	1834.62	0	2331.98	760.899	Unknown	Cytoplasm	35	Unknown	Cytoplasmic	Extracellular	Cytoplasmic	Unknown	-	-	Hypothetical proteins	Conserved
15800170	P0ACF6	NP_286182.1	Z0547	hupB	CY, Ht-24	transcriptional regulator HU subunit beta [Escherichia coli O157:H7 EDL933]	381 / 132 / 76 / 743	9225.13	2855.89	0	0	0	0	3701.87	0	2013.82	0	511.764	0	0	756.945	Cytoplasmic	Cytoplasm	90	Cytoplasmic	Periplasmic	Cytoplasmic	Cytoplasmic	Cytoplasmic	-	-	DNA metabolism	Chromosome-associated proteins
15804703	P0C0L8	NP_290744.1	Z5713	proP	IM, Ho-2	proline/glycine betaine transporter [Escherichia coli O157:H7 EDL933]	382 / 887 / - / 1536	54843.9	0	1677.35	458.594	753.15	0	2833.81	354.699	1016.42	685.04	391.759	842.056	0	751.073	Cytoplasmic Membrane	Inner membrane	500	Inner Membrane	Cytoplasmic	Cytoplasmic	Cytoplasmic	Inner Membrane	-	-	Transport and binding proteins	Amino acids, peptides and amines
15804551	Q8X745	NP_290592.1	Z5513	yijP	IM	conserved inner membrane protein YijP [Escherichia coli O157:H7 EDL933]	383 / - / 1062 / 1748	66712.39*	1530.67	1175.57	775.251	1055.69	0	1588.86	192.705	864.341	270.9	660.872	0	846.141	746.75	Cytoplasmic Membrane	Inner membrane	577	Outer Membrane	X	Cytoplasmic	Cytoplasmic	Inner Membrane	-	-	Unknown function	General
15803116	P63285	NP_289147.1	Z3886	clpB	CY, Ho-4	protein disaggregation chaperone [Escherichia coli O157:H7 EDL933]	384 / 30 / 297 / 409	95925.9	902.547	0	0	0	1017.74	0	2523.07	0	1145.21	741.574	2393.09	237.343	746.715	Cytoplasmic	Cytoplasm	857	Cytoplasmic	Cytoplasmic	Cytoplasmic	Cytoplasmic	Cytoplasmic	-	-	Energy metabolism	Electron transport
15800289	Q8XBY0	NP_286301.1	Z0715	pheP	IM	phenylalanine transporter [Escherichia coli O157:H7 EDL933]	385 / - / - / 1008	50670.5	0	0	0	1696.11	0	3190.89	0	1149.33	0	1771.94	0	1126.15	744.535	Cytoplasmic Membrane	Inner membrane	458	Inner Membrane	Cytoplasmic	Cytoplasmic	Cytoplasmic	Inner Membrane	-	-	Transport and binding proteins	Amino acids, peptides and amines
15803475	P60652	NP_289508.1	Z4281	speB	CY, Ho-2	agmatinase [Escherichia coli O157:H7 EDL933]	386 / 115 / - / 1355	33555.7	0	0	345.301	0	0	0	4637.24	0	0	1590.12	2279.72	0	737.699	Cytoplasmic	Cytoplasm	306	Unknown	Cytoplasmic	Cytoplasmic	Cytoplasmic	Cytoplasmic	-	-	Central intermediary metabolism	Polyamine biosynthesis
15804972	P0A9Q3	NP_291014.1	Z6004	arcA	CY, Ho-Mu	two-component response regulator [Escherichia coli O157:H7 EDL933]	387 / 318 / 179 / 34	27291	0	0	0	0	0	0	0	0	3406.41	4250.83	0	1147.71	733.746	Cytoplasmic	Cytoplasm	238	Cytoplasmic	Cytoplasmic	Cytoplasmic	Cytoplasmic	Cytoplasmic	-	-	Regulatory functions	Other
15803981	Q8X6Q4	NP_290017.1	Z4843	zntA	IM	zinc/cadmium/mercury/lead-transporting ATPase [Escherichia coli O157:H7 EDL933]	388 / 802 / 1392 / -	76720.5	1412.87	1084.01	992.875	324.295	188.66	2238.36	0	1106.97	588.855	168.533	0	649.548	729.581	Cytoplasmic Membrane	Inner membrane	732	Inner Membrane	Cytoplasmic	Cytoplasmic	Cytoplasmic	Inner Membrane	-	-	Transport and binding proteins	Cations and iron carrying compounds
15803473	Q8XCY2	NP_289506.1	Z4279	tktA	CY, Ho-2	transketolase [Escherichia coli O157:H7 EDL933]	389 / 20 / 309 / 320	72212.5*	2780.12	0	0	0	1662.46	0	391.911	474.247	315.623	908.516	781.742	1395.71	725.861	Unknown	Periplasm	663	Unknown	X	Periplasmic	Cytoplasmic	Cytoplasmic	-	-	Energy metabolism	Pentose phosphate pathway
15804184	P66680	NP_290223.1	Z5068	rph	CY, Ho-6	ribonuclease PH [Escherichia coli O157:H7 EDL933]	390 / 507 / 570 / 1379	25310.9	0	0	0	0	0	0	0	0	3451.18	1466.43	3155.15	619.525	724.358	Cytoplasmic	Cytoplasm	238	Cytoplasmic	Cytoplasmic	Cytoplasmic	Cytoplasmic	Unknown	-	-	Transcription	Degradation of RNA
15803837	P0ADY5	NP_289871.1	Z4680	rplN	CY, 50S Rib	50S ribosomal protein L14 [Escherichia coli O157:H7 EDL933]	391 / 460 / 806 / 46	13540.5	739.644	1759.1	0	939.509	0	3302.13	0	1432.49	0	516.649	0	0	724.127	Cytoplasmic	Cytoplasm	123	Cytoplasmic	Cytoplasmic	Cytoplasmic	Cytoplasmic	Cytoplasmic	-	-	Protein synthesis	Ribosomal proteins: synthesis and modification
15803281	Q8X7U2	NP_289313.1	Z4073	cysI	CY, Ho-4, Ht-12	sulfite reductase subunit beta [Escherichia coli O157:H7 EDL933]	392 / 546 / 910 / 747	63957.7	936.911	431.301	0	1161.96	0	322.329	654.784	0	951.051	1481.88	1449.12	1207.26	716.383	Cytoplasmic	Cytoplasm	570	periplasm	Cytoplasmic	Cytoplasmic	Cytoplasmic	Cytoplasmic	-	-	Central intermediary metabolism	Sulfur metabolism
15804057	Q8X4L0	NP_290093.1	Z4926	mdtE (yhiU)	L-IM, Ht-9	multidrug resistance efflux protein MdtE [Escherichia coli O157:H7 EDL933]	393 / - / - / 1491	41219	360.345	1396.18	2762.76	500.971	0	628.381	763.217	1026.75	0	785.128	0	331.325	712.922	Cytoplasmic Membrane	Inner membrane	385	Inner Membrane	Periplasmic	Cytoplasmic	Periplasmic	Outer Membrane	-	-	Regulatory functions	Other
15803838	P0AG65	NP_289872.1	Z4681	rpsQ	CY, 30S Rib	30S ribosomal protein S17 [Escherichia coli O157:H7 EDL933]	394 / 685 / 866 / 37	9704.12	0	0	0	0	0	0	0	0	0	1796.49	5810.74	933.336	711.714	Cytoplasmic	Cytoplasm	84	Cytoplasmic	Cytoplasmic	Cytoplasmic	Cytoplasmic	Cytoplasmic	-	-	Protein synthesis	Ribosomal proteins: synthesis and modification
15804330	P0ACC8	NP_290369.1	Z5228	glmU	CY, Ho-3	bifunctional N-acetylglucosamine-1-phosphate uridyltransferase/glucosamine-1-phosphate acetyltransferase [Escherichia coli O157:H7 EDL933]	395 / 300 / 912 / 1630	49192.57*	724.943	834.307	611.211	0	0	0	1519.93	0	457.122	0	3363.81	999.85	709.265	Cytoplasmic	Cytoplasm	456	Cytoplasmic	X	Cytoplasmic	Cytoplasmic	Cytoplasmic	-	-	Cell envelope	Biosynthesis and degradation of surface polysaccharides and lipopolysaccharides
15802274	P0A811	NP_288298.1	Z2913	ruvA	CY, Ht-3	Holliday junction DNA helicase motor protein [Escherichia coli O157:H7 EDL933]	396 / 411 / 660 / -	22084.8	2735.9	0	0	552.693	0	1576.14	1253.92	1714.85	0	653.288	0	0	707.233	Cytoplasmic	Cytoplasm	203	Cytoplasmic	Cytoplasmic	Cytoplasmic	Cytoplasmic	Cytoplasmic	-	-	DNA metabolism	DNA replication, recombination, and repair
15800789	Q8XDF3	NP_286803.1	Z1275	aspC	CY, Ho-2	aromatic amino acid aminotransferase [Escherichia coli O157:H7 EDL933]	397 / 34 / 220 / 532	43643.7	551.345	1056.79	682.277	569.816	708.284	0	770.642	0	0	2180.11	1705.53	252.89	706.474	Cytoplasmic	Cytoplasm	396	Cytoplasmic	Cytoplasmic	Cytoplasmic	Cytoplasmic	Cytoplasmic	-	-	Amino acid biosynthesis	Aspartate family
15803318	P0AAD7	NP_289351.1	Z4113	sdaC	IM	serine transporter [Escherichia coli O157:H7 EDL933]	398 / - / - / 1537	46904.7	0	3823.12	557.191	354.165	0	1843.4	0	1323.83	0	509.321	0	0	700.919	Cytoplasmic Membrane	Inner membrane	429	Inner Membrane	Cytoplasmic	Cytoplasmic	Cytoplasmic	Inner Membrane	-	-	Transport and binding proteins	Amino acids, peptides and amines
15802827	P0AFE2	NP_288854.1	Z3539	nuoJ	IM, Ht-13	NADH dehydrogenase subunit J [Escherichia coli O157:H7 EDL933]	399 / - / - / -	19874	0	0	0	8351.91	0	0	0	0	0	0	0	0	695.992	Cytoplasmic Membrane	Inner membrane	184	Inner Membrane	Cytoplasmic	Cytoplasmic	Cytoplasmic	Inner Membrane	-	-	Energy metabolism	Electron transport
161367583	Q9S5G5	NP_288527.2	Z3184	hisB	CY, Ho-2	imidazole glycerol-phosphate dehydratase/histidinol phosphatase [Escherichia coli O157:H7 EDL933]	400 / 631 / 1375 / 770	40288.5	719.532	0	0	992.41	0	1244.43	754.672	331.546	345.192	2588.83	0	1325.7	691.86	Cytoplasmic	Cytoplasm	355	Cytoplasmic	Cytoplasmic	Cytoplasmic	Cytoplasmic	Cytoplasmic	-	-	Amino acid biosynthesis	Histidine family
15800793	Q8XDE6	NP_286807.1	Z1280	pepN	CY	aminopeptidase N [Escherichia coli O157:H7 EDL933]	401 / 96 / 729 / 292	98885.65*	513.497	0	0	238.042	0	0	969.69	0	103.873	2867.9	535.923	3032.99	688.493	Cytoplasmic	Extracellular	870	Extracellular	X	Cytoplasmic	Cytoplasmic	Cytoplasmic	-	-	Protein fate	Degradation of proteins, peptides, and glycopeptides
15799847	P62769	NP_285859.1	Z0175	yaeH		conserved protein YaeH [Escherichia coli O157:H7 EDL933]	402 / 368 / 235 / 434	15095.6	214.366	0	0	0	0	0	603.438	0	2231.8	315.187	4760.86	0	677.137	Cytoplasmic	Periplasm	128	Cytoplasmic	Cytoplasmic	Cytoplasmic	Cytoplasmic	Cytoplasmic	-	-	Unclassified	Role category not yet assigned
15802130	P0A709	NP_288152.1	Z2747	infC	CY, Rib	translation initiation factor IF-3 [Escherichia coli O157:H7 EDL933]	403 / 410 / 267 / 183	16636.8	0	0	0	0	0	0	0	0	0	1029.1	4428.37	2635.19	674.388	Cytoplasmic	Cytoplasm	180	Cytoplasmic	Cytoplasmic	Cytoplasmic	Cytoplasmic	Cytoplasmic	-	-	Protein synthesis	Translation factors
15803477	Q8XCX9	NP_289510.1	Z4283	speA	PP, Ho-4	arginine decarboxylase [Escherichia coli O157:H7 EDL933]	404 / 215 / 1003 / 167	73883.6	1289.46	0	0	161.873	0	277.4	1126.46	299.417	817.664	1622.32	1495.8	890.108	665.042	Periplasmic	Cytoplasm	658	periplasm	Periplasmic	Periplasmic	Cytoplasmic	Unknown	-	-	Central intermediary metabolism	Polyamine biosynthesis
15802950	Q8XBL1	NP_288979.1	Z3683	crr	CY, Ht-Mu	glucose-specific PTS system component [Escherichia coli O157:H7 EDL933]	405 / - / 24 / 296	18265.4	0	0	0	0	0	0	1207.72	0	1083.2	1237.42	2672.57	1590.52	649.286	Cytoplasmic	Inner membrane	169	Cytoplasmic	Cytoplasmic	Cytoplasmic	Cytoplasmic	Cytoplasmic	-	-	Transport and binding proteins	Carbohydrates, organic alcohols, and acids
15802683	Q8X666	NP_288710.1	Z3382	dld	CY/IM	D-lactate dehydrogenase [Escherichia coli O157:H7 EDL933]	406 / 1081 / 1308 / 540	64683	864.81	398.828	272.629	835.702	1435.94	447.81	240.183	153.56	878.917	622.867	803.205	797.403	645.988	Cytoplasmic Membrane	Cytoplasm	571	Unknown	Cytoplasmic	Cytoplasmic	Cytoplasmic	Cytoplasmic	-	-	Energy metabolism	Aerobic
15804656	P0AF53	NP_290697.1	Z5663	yjcD	IM	predicted permease YjcD [Escherichia coli O157:H7 EDL933]	407 / 655 / - / -	45709.8	0	0	732.251	0	0	2425.63	1965.07	2621.07	0	0	0	0	645.334	Cytoplasmic Membrane	Inner membrane	449	Cytoplasmic	Extracellular	Cytoplasmic	Cytoplasmic	Inner Membrane	-	-	Unknown function	General
15800775	P60753	NP_286789.1	Z1260	msbA	IM, Ho-2	lipid transporter ATP-binding/permease protein [Escherichia coli O157:H7 EDL933]	408 / - / - / 1465	64458.3	778.176	1395.34	214.359	1074.05	0	1346.67	0	241.582	268.838	373.572	802.725	1195.63	640.912	Cytoplasmic Membrane	Inner membrane	582	Inner Membrane	Cytoplasmic	Cytoplasmic	Cytoplasmic	Inner Membrane	-	-	Transport and binding proteins	Other
161367648	Q8X7R2	NP_285938.2	Z0278	fadE	IM	acyl-CoA dehydrogenase [Escherichia coli O157:H7 EDL933]	409 / - / - / 1862	89178.1	526.517	0	0	846.465	228.049	1819.95	0	1980.11	0	630.827	814.365	807.673	637.83	Cytoplasmic Membrane	Cytoplasm	814	Unknown	Cytoplasmic	Cytoplasmic	Cytoplasmic	Inner Membrane	-	-	Central intermediary metabolism	Other
15804271	Q8XC23	NP_290310.1	Z5165	ilvB	CY, Ht-4	acetolactate synthase catalytic subunit [Escherichia coli O157:H7 EDL933]	410 / 439 / 781 / 224	60393.93*	783.363	0	0	1371.98	0	0	0	0	1512.96	2290.56	589.676	1099.54	637.34	Cytoplasmic Membrane	Cytoplasm	562	Cytoplasmic	X	Cytoplasmic	Cytoplasmic	Cytoplasmic	-	-	Amino acid biosynthesis	Pyruvate family
15803974	Q8X6R6	NP_290010.1	Z4836	ftsX	IM, Ht-Mu, divisome	cell division protein FtsX [Escherichia coli O157:H7 EDL933]	411 / - / - / -	38541.2	1009.09	0	463.629	0	421.161	1310.5	349.471	191.013	633.595	1090.29	777.881	1394.96	636.799	Cytoplasmic Membrane	Inner membrane	352	Inner Membrane	Cytoplasmic	Cytoplasmic	Cytoplasmic	Inner Membrane	-	-	Protein fate	Protein and peptide secretion and trafficking
15801473	Q8X558	NP_287490.1	Z2023	oppF	IM, Ht-5	oligopeptide ABC transporter ATP-binding protein [Escherichia coli O157:H7 EDL933]	412 / 737 / 1356 / 403	37180.3	1551.23	0	0	854.611	0	1608.59	215.587	583.323	1175.78	1115.24	0	469.385	631.145	Cytoplasmic Membrane	Inner membrane	334	Inner Membrane	Cytoplasmic	Cytoplasmic	Cytoplasmic	Cytoplasmic	-	-	Transport and binding proteins	Amino acids, peptides and amines
15803952	Q8X6V5	NP_289988.1	Z4808	yhhX	CY	predicted galactose 1-dehydrogenase [Escherichia coli O157:H7 EDL933]	413 / 377 / 739 / 1534	38780.5	0	0	0	128.267	301.301	0	0	0	0	1118.6	4211.4	1790.05	629.134	Cytoplasmic	Cytoplasm	345	Unknown	Cytoplasmic	Cytoplasmic	Cytoplasmic	Cytoplasmic	-	-	Energy metabolism	Electron transport
15804140	Q8XDH1	NP_290179.1	Z5023	mtlA	IM, Ht-5	PTS system, mannitol-specific enzyme IIABC components [Escherichia coli O157:H7 EDL933]	414 / 799 / 612 / 1495	68081.32*	350.952	1626.48	589.64	0	0	2442.56	493.111	1993.13	0	0	0	0	624.656	Cytoplasmic Membrane	Inner membrane	637	Inner Membrane	X	Cytoplasmic	Cytoplasmic	Inner Membrane	-	-	Transport and binding proteins	Carbohydrates, organic alcohols, and acids
15800379	P0AF19	NP_286391.1	Z0824	nagA	CY, Ho-4	N-acetylglucosamine-6-phosphate deacetylase [Escherichia coli O157:H7 EDL933]	415 / 192 / 341 / 726	40947.6	0	0	0	667.808	0	0	330.922	0	0	2442.55	1338.18	2680.28	621.645	Cytoplasmic	Cytoplasm	382	Cytoplasmic	Cytoplasmic	Cytoplasmic	Cytoplasmic	Cytoplasmic	-	-	Central intermediary metabolism	Amino sugars
15804295	P0A990	NP_290334.1	Z5192	dnaN	Cy, Ho-2	DNA polymerase III subunit beta [Escherichia coli O157:H7 EDL933]	416 / 667 / 850 / 744	40585.1	0	0	0	1255.9	0	0	636.885	0	570.468	2293.32	1409.65	1258.26	618.707	Cytoplasmic	Cytoplasm	366	Cytoplasmic	Cytoplasmic	Cytoplasmic	Cytoplasmic	Cytoplasmic	-	-	DNA metabolism	DNA replication, recombination, and repair
15803769	P0AEE4	NP_289803.1	Z4594	degS	IM, Ho-3	serine endoprotease [Escherichia coli O157:H7 EDL933]	417 / - / - / -	37585.36*	562.19	0	0	676.496	0	1972.25	0	2145.81	0	2051.05	0	0	617.317	Periplasmic	Extracellular	355	Extracellular	X	Extracellular	Cytoplasmic	Outer Membrane	-	-	Protein fate	Degradation of proteins, peptides, and glycopeptides
15799874	Q8X8W4	NP_285886.1	Z0204	nlpE (cutF)	L-OM	copper homeostasis and adhesion lipoprotein [Escherichia coli O157:H7 EDL933]	418 / - / - / -	25853.2	0	2226.65	1458.86	398.238	0	1002.75	805.861	513.629	0	832.753	0	0	603.228	Outer Membrane	Cytoplasm	236	Outer Membrane	Periplasmic	Periplasmic	Periplasmic	Periplasmic	-	-	Cellular processes	Detoxification
15802505	Q9S5G3	NP_288531.1	Z3188	hisI	CY	bifunctional phosphoribosyl-AMP cyclohydrolase/phosphoribosyl-ATP pyrophosphatase protein [Escherichia coli O157:H7 EDL933]	419 / 364 / 461 / 850	22840.1	0	0	0	0	0	0	872.014	0	3179.95	0	1954.41	1155.77	596.845	Cytoplasmic	Cytoplasm	203	Cytoplasmic	Cytoplasmic	Cytoplasmic	Cytoplasmic	Cytoplasmic	-	-	Amino acid biosynthesis	Histidine family
15803078	P0A9Z3	NP_289109.1	Z3829	glnB	CY, Ho-3	nitrogen regulatory protein P-II 1 [Escherichia coli O157:H7 EDL933]	420 / - / 134 / 790	12380.69*	0	0	2606.99	1156.21	0	0	1812.6	0	0	1565.25	0	0	595.088	Cytoplasmic Membrane	Cytoplasm	112	Cytoplasmic	X	Cytoplasmic	Cytoplasmic	Cytoplasmic	-	-	Regulatory functions	Protein interactions
15799805	P66834	NP_285817.1	Z0131	speE	CY, Ho-2	spermidine synthase [Escherichia coli O157:H7 EDL933]	421 / 388 / 644 / 1315	32306.2	0	1534.91	0	461.956	0	0	1421.98	0	0	3715.34	0	0	594.515	Unknown	Inner membrane	288	Unknown	Cytoplasmic	Cytoplasmic	Cytoplasmic	Cytoplasmic	-	-	Central intermediary metabolism	Polyamine biosynthesis
15800120	Q8XEA1	NP_286132.1	Z0492	rdgC	CY, Ho-Mu	recombination associated protein [Escherichia coli O157:H7 EDL933]	422 / 243 / 853 / 1299	33934	2060.78	628.778	0	0	0	2493.15	0	1937.53	0	0	0	0	593.354	Cytoplasmic	Cytoplasm	303	Cytoplasmic	Cytoplasmic	Cytoplasmic	Cytoplasmic	Cytoplasmic	-	-	DNA metabolism	DNA replication, recombination, and repair
15799833	Q8X903	NP_285845.1	Z0160	mrcB	IM, Ho-2, divisome	penicillin-binding protein 1b [Escherichia coli O157:H7 EDL933]	423 / - / - / 1809	94260.8	105.036	679.261	447.862	731.993	0	1530.11	0	998.859	0	1273	0	1303.77	589.158	Cytoplasmic Membrane	Inner membrane	844	Inner Membrane	Periplasmic	Cytoplasmic	Periplasmic	Inner Membrane	-	-	Cell envelope	Biosynthesis and degradation of murein sacculus and peptidoglycan
161367456	Q8XDL9	NP_290809.2	Z5786	vacB	CY	exoribonuclease R [Escherichia coli O157:H7 EDL933]	424 / 484 / 752 / 823	92161.7	433.574	0	0	0	572.067	1248.91	0	815.287	176.597	623.427	1564.76	1596.24	585.905	Cytoplasmic	Cytoplasm	827	Cytoplasmic	Cytoplasmic	Cytoplasmic	Cytoplasmic	Cytoplasmic	-	-	Regulatory functions	Other
15802050	Q8X649	NP_288072.1	Z2648	pdxY	CY, Ho-2	pyridoxamine kinase [Escherichia coli O157:H7 EDL933]	425 / 448 / 721 / -	31347.1	2016.48	0	0	0	0	0	2107.55	0	0	0	2883.22	0	583.937	Cytoplasmic	Cytoplasm	287	Cytoplasmic	Cytoplasmic	Cytoplasmic	Cytoplasmic	Unknown	-	-	Biosynthesis of cofactors, prosthetic groups, and carriers	Pyridoxine
15800054	Q8X6A3	NP_286066.1	Z0420	yahK	CY	putative oxidoreductase [Escherichia coli O157:H7 EDL933]	426 / 246 / 396 / 1128	37966.9	0	0	0	0	0	0	0	0	1076.64	3050.12	1312.12	1560.67	583.297	Cytoplasmic	Cytoplasm	349	Cytoplasmic	Cytoplasmic	Cytoplasmic	Cytoplasmic	Cytoplasmic	-	-	Regulatory functions	Other
15801460	Q8XDC4	NP_287477.1	Z2008	purU	CY, Ho-6	formyltetrahydrofolate deformylase [Escherichia coli O157:H7 EDL933]	427 / 384 / 695 / 1463	31941.26*	943.695	0	0	0	0	0	0	0	2501.4	353.261	2284.33	902.412	582.091	Cytoplasmic	Cytoplasm	280	Cytoplasmic	X	Cytoplasmic	Cytoplasmic	Cytoplasmic	-	-	Purines, pyrimidines, nucleosides, and nucleotides	Purine ribonucleotide biosynthesis
15801905	Q8X7C5	NP_287925.1	Z2536	topA	CY, Ho-1	DNA topoisomerase I [Escherichia coli O157:H7 EDL933]	428 / 596 / 1155 / 939	97346.7	246.334	1932.29	1380.47	347.049	0	435.27	1232.08	828.754	381.941	73.141	0	105.017	580.196	Cytoplasmic	Cytoplasm	865	Cytoplasmic	Periplasmic	Periplasmic	Periplasmic	Cytoplasmic	-	-	DNA metabolism	DNA replication, recombination, and repair
15801894	P0ADA9	NP_287914.1	Z2523	osmB	L (IM or OM)	osmotically-inducible lipoprotein B [Escherichia coli O157:H7 EDL933]	429 / - / - / 215	6947.77	0	0	0	0	0	0	0	0	0	6941.18	0	0	578.432	Cytoplasmic Membrane	Outer membrane	72	periplasm	Extracellular	Extracellular	Extracellular	Extracellular	-	-	Cell envelope	Other
15803735	P63388	NP_289769.1	Z4558	yrbF (mlaF)	IM, Ht-8	probable phospholipid import ATP-binding protein MlaF [Escherichia coli O157:H7 EDL933]	430 / 957 / 1214 / 870	29095.7	230.584	0	0	407.325	0	1539.07	0	0	0	1280.45	1835.38	1639.25	577.671	Cytoplasmic Membrane	Inner membrane	269	Unknown	Cytoplasmic	Cytoplasmic	Cytoplasmic	Cytoplasmic	-	-	Transport and binding proteins	Unknown substrate
15804847	P0AF91	NP_290888.1	Z5867	rraB (yjgD)	CY, Ht-15, degradosome	ribonuclease E inhibitor protein B [Escherichia coli O157:H7 EDL933]	431 / 131 / 399 / 77	15602.1	0	2506.29	0	0	0	0	1868.83	0	0	0	2532.65	0	575.648	Cytoplasmic	Cytoplasm	138	Unknown	Cytoplasmic	Cytoplasmic	Cytoplasmic	Cytoplasmic	-	-	Hypothetical proteins	Conserved
15801458	Q8XDC5	NP_287475.1	Z2004	narI	IM, Ht-3	nitrate reductase 1, cytochrome b(NR), gamma subunit [Escherichia coli O157:H7 EDL933]	432 / - / - / -	25482.5	0	1140.39	0	0	0	0	0	0	0	5706.52	0	0	570.575	Cytoplasmic Membrane	Inner membrane	225	Inner Membrane	Cytoplasmic	Cytoplasmic	Cytoplasmic	Inner Membrane	-	-	Energy metabolism	Anaerobic
15802824	P0AFE9	NP_288851.1	Z3536	nuoM	IM, Ht-13	NADH dehydrogenase subunit M [Escherichia coli O157:H7 EDL933]	433 / - / - / -	56522.7	1490.36	0	0	2097.03	1900.58	0	0	1318.65	0	0	0	0	567.218	Cytoplasmic Membrane	Inner membrane	509	Inner Membrane	Cytoplasmic	Cytoplasmic	Cytoplasmic	Inner Membrane	-	-	Energy metabolism	Electron transport
15803024	P0A7B2	NP_289054.1	Z3764	ppk	IM, Ho-4	polyphosphate kinase [Escherichia coli O157:H7 EDL933]	434 / 1094 / - / 1047	80428.6	646.724	595.431	0	1604.14	0	1341.28	88.823	1094.48	0	929.911	0	470.908	564.308	Cytoplasmic Membrane	Inner membrane	688	Inner Membrane	Cytoplasmic	Cytoplasmic	Cytoplasmic	Cytoplasmic	-	-	Central intermediary metabolism	Phosphorus compounds
15804660	Q8X5T6	NP_290701.1	Z5667	yjcH	IM	conserved inner membrane protein YjcH [Escherichia coli O157:H7 EDL933]	435 / - / - / -	11657.2	1781.91	1030.77	0	1208.83	0	0	1115.81	1626.65	0	0	0	0	563.664	Cytoplasmic Membrane	Inner membrane	104	Unknown	Cytoplasmic	Cytoplasmic	Cytoplasmic	Inner Membrane	-	-	Unknown function	General
15800519	Q8X4S1	NP_286531.1	Z0984	_	L (IM or OM)	unknown protein encoded by prophage CP-933K [Escherichia coli O157:H7 EDL933]	436 / - / - / 734	11415.8	0	0	0	1178.3	0	0	0	1780.85	0	2049.62	0	1749.3	563.172	Unknown	Cytoplasm	102	Unknown	Cytoplasmic	Cytoplasmic	Cytoplasmic	Cytoplasmic	-	-	Mobile and extrachromosomal element functions	Prophage functions
15801585	Q7DBK0	NP_287602.1	Z2148	_	L (IM or OM)	unknown protein encoded within prophage CP-933O Z2148 [Escherichia coli O157:H7 EDL933]	437 / - / - / -	9985.08*	538.906	0	0	0	0	6210.02	0	0	0	0	0	0	562.41	Unknown	Cytoplasm	89	Unknown	X	Cytoplasmic	Cytoplasmic	Cytoplasmic	-	-	Hypothetical proteins	Conserved
15802177	Q8XDW5	NP_288199.1	Z2799	sppA	IM, Ho-4	protease 4 [Escherichia coli O157:H7 EDL933]	438 / - / - / 1587	67139.86*	237.792	551.022	0	824.72	0	1241.24	0	222.602	292.886	860.555	740.548	1762.71	561.173	Cytoplasmic Membrane	Inner membrane	618	Inner Membrane	Periplasmic	Cytoplasmic	Periplasmic	Cytoplasmic	-	-	Protein fate	Degradation of proteins, peptides, and glycopeptides
15804428	P69430	NP_290468.1	Z5358	tatA	IM, Ho-Mu, Ht-4	twin arginine translocase protein A [Escherichia coli O157:H7 EDL933]	439 / - / 942 / -	11399.52*	0	595.808	673.12	2762.55	0	0	2241.71	0	0	0	0	419.222	557.702	Cytoplasmic Membrane	Inner membrane	89	Inner Membrane	X	Cytoplasmic	Periplasmic	Inner Membrane	-	-	Unknown function	General
15802298	Q8XCF6	NP_288323.1	Z2940	tar	IM, Ho-2, Ht-6	methyl-accepting chemotaxis protein II [Escherichia coli O157:H7 EDL933]	440 / 620 / 1061 / 1573	59942.85*	0	1557.28	641.349	0	0	876.989	531.946	477.083	1287.59	0	781.783	467.037	551.755	Cytoplasmic Membrane	Inner membrane	553	Inner Membrane	X	Extracellular	Cytoplasmic	Inner Membrane	-	-	Cellular processes	Chemotaxis and motility
15800463	P0AB92	NP_286475.1	Z0924	aroG	CY, Ho-4	phospho-2-dehydro-3-deoxyheptonate aldolase [Escherichia coli O157:H7 EDL933]	441 / 360 / 317 / 705	38008.1	0	0	0	540.757	0	0	0	0	1493.79	1974.89	1820.87	715.069	545.448	Cytoplasmic	Cytoplasm	350	Cytoplasmic	Cytoplasmic	Cytoplasmic	Cytoplasmic	Cytoplasmic	-	-	Amino acid biosynthesis	Aromatic amino acid family
15802140	Q8XE15	NP_288162.1	Z2758	ydjN	IM	putative cation-acid symporter [Escherichia coli O157:H7 EDL933]	442 / - / - / -	48689	0	952.042	0	2304.97	0	1156.24	0	203.186	0	1442.64	0	464.077	543.596	Cytoplasmic Membrane	Inner membrane	463	Inner Membrane	Extracellular	Cytoplasmic	Cytoplasmic	Inner Membrane	-	-	Energy metabolism	Electron transport
15804797	Q8XCI1	NP_290838.1	Z5817	ytfB	IM	predicted cell envelope opacity-associated protein [Escherichia coli O157:H7 EDL933]	443 / 766 / - / 942	24986.1	0	548.516	0	0	0	1257.09	0	2051.78	0	396.105	2250.24	0	541.978	Unknown	Inner membrane	224	Unknown	Cytoplasmic	Cytoplasmic	Periplasmic	Cytoplasmic	-	-	Unclassified	Role category not yet assigned
15801998	P0A952	NP_288019.1	Z2571	speG	CY, Ho-4	spermidine N1-acetyltransferase [Escherichia coli O157:H7 EDL933]	444 / 392 / 608 / 1159	21886.3	0	0	0	0	0	1036.57	0	0	752.335	929.922	3713.59	0	536.034	Cytoplasmic	Cytoplasm	186	Cytoplasmic	Cytoplasmic	Cytoplasmic	Cytoplasmic	Cytoplasmic	-	-	Central intermediary metabolism	Polyamine biosynthesis
15799795	Q8X970	NP_285807.1	Z0121	ampE	IM	regulatory protein AmpE [Escherichia coli O157:H7 EDL933]	445 / - / - / -	32140	0	0	0	0	2652.1	1771.12	0	957.611	0	358.688	613.801	0	529.443	Cytoplasmic Membrane	Inner membrane	284	Inner Membrane	Cytoplasmic	Cytoplasmic	Cytoplasmic	Inner Membrane	-	-	Transport and binding proteins	Other
15804586	P0AFX5	NP_290627.1	Z5570	yjaE (rsd)	CY, Ht-Mu	anti-RNA polymerase sigma 70 factor [Escherichia coli O157:H7 EDL933]	446 / 553 / 699 / 462	18204.92*	1113.38	0	0	1538.54	0	2894.46	0	0	0	800.048	0	0	528.869	Cytoplasmic	Cytoplasm	158	Unknown	X	Cytoplasmic	Cytoplasmic	Cytoplasmic	-	-	Regulatory functions	Other
15804062	Q8X5N0	NP_290098.1	Z4931	yhjA	PP	putative cytochrome C peroxidase [Escherichia coli O157:H7 EDL933]	447 / 788 / 1177 / 1067	51524.5	252.179	383.139	428.665	1402.22	0	1099.16	888.944	238.221	440.673	731.572	0	468.284	527.755	Periplasmic	Periplasm	465	periplasm	Periplasmic	Periplasmic	Periplasmic	Inner Membrane	-	-	Energy metabolism	Electron transport
15802547	P63902	NP_288573.1	Z3233	dcd	CY, Ho-4	deoxycytidine triphosphate deaminase [Escherichia coli O157:H7 EDL933]	448 / 279 / 953 / 1140	21250.3	0	0	0	0	4217.43	762.28	282.269	243.945	0	0	0	799.746	525.472	Cytoplasmic	Extracellular	193	Unknown	Cytoplasmic	Cytoplasmic	Cytoplasmic	Cytoplasmic	-	-	Purines, pyrimidines, nucleosides, and nucleotides	2'-Deoxyribonucleotide metabolism
15804659	Q8X5T7	NP_290700.1	Z5666	actP	IM	acetate permease [Escherichia coli O157:H7 EDL933]	449 / - / - / -	59221.9	921.617	962.097	772.876	636.66	0	799.544	0	1727.93	0	466.864	0	0	523.966	Cytoplasmic Membrane	Inner membrane	549	Inner Membrane	Cytoplasmic	Cytoplasmic	Cytoplasmic	Inner Membrane	-	-	Transport and binding proteins	Unknown substrate
15804564	Q8X714	NP_290605.1	Z5527	btuB	bb-OM	vitamin B12/cobalamin outer membrane transporter [Escherichia coli O157:H7 EDL933]	450 / - / - / 1078	68354.3	0	1283.88	234.107	0	0	2651.08	0	1311.08	0	802.037	0	0	523.515	Outer Membrane	Outer membrane	614	Outer Membrane	Extracellular	Periplasmic	Extracellular	Outer Membrane	-	-	Transport and binding proteins	Other
15802136	P58065	NP_288158.1	Z2754	yniA	CY	predicted phosphotransferase/kinase YniA [Escherichia coli O157:H7 EDL933]	451 / 536 / 224 / 166	32527.01*	1910.06	0	0	435.475	705.639	2193.28	0	0	0	915.753	0	0	513.35	Unknown	Cytoplasm	286	Unknown	X	Cytoplasmic	Cytoplasmic	Cytoplasmic	-	-	Unclassified	Role category not yet assigned
15803725	P0A7M0	NP_289759.1	Z4547	rpmA	CY, 50S Rib	50S ribosomal protein L27 [Escherichia coli O157:H7 EDL933]	452 / 719 / 993 / 64	9124.09	741.58	0	0	0	0	0	0	0	0	675.973	4683.46	0	508.418	Cytoplasmic	Cytoplasm	85	Cytoplasmic	Cytoplasmic	Cytoplasmic	Extracellular	Cytoplasmic	-	-	Protein synthesis	Ribosomal proteins: synthesis and modification
15803710	P0A706	NP_289744.1	Z4529	infB	CY, Rib	translation initiation factor IF-2 [Escherichia coli O157:H7 EDL933]	453 / 344 / 312 / 404	97323.29*	145.84	0	0	0	0	238.449	0	106.265	1122.32	1483.78	2052.1	949.778	508.211	Cytoplasmic	Cytoplasm	890	Cytoplasmic	X	Cytoplasmic	Cytoplasmic	Cytoplasmic	-	-	Protein synthesis	Translation factors
15804573	P0A7J9	NP_290614.1	Z5556	rplK	CY, 50S Rib	50S ribosomal protein L11 [Escherichia coli O157:H7 EDL933]	454 / 642 / 72 / 39	14874.7	3127.49	0	0	0	978.716	1351.31	0	624.624	0	0	0	0	506.845	Cytoplasmic	Cytoplasm	142	Cytoplasmic	Periplasmic	Cytoplasmic	Periplasmic	Cytoplasmic	-	-	Protein synthesis	Ribosomal proteins: synthesis and modification
15800920	Q7AFV7	NP_286936.1	Z1418	cbpA	CY, Ho-2	curved DNA-binding protein CbpA [Escherichia coli O157:H7 EDL933]	455 / 496 / 951 / 1695	34387.6	0	0	833.252	0	0	0	1933.06	0	1409.6	832.347	0	1069.43	506.475	Cytoplasmic	Inner membrane	306	Cytoplasmic	Cytoplasmic	Cytoplasmic	Cytoplasmic	Cytoplasmic	-	-	Protein fate	Protein folding and stabilization
15799845	P0C0V1	NP_285857.1	Z0173	htrA	PP, Ho-6	serine endoprotease [Escherichia coli O157:H7 EDL933]	456 / 97 / 138 / 575	49352.3	0	365.392	0	166.367	0	195.66	542.782	0	1642.44	744.486	1201.25	1191.38	504.146	Periplasmic	Extracellular	474	Extracellular	Periplasmic	Periplasmic	Periplasmic	Periplasmic	-	-	Protein fate	Degradation of proteins, peptides, and glycopeptides
15804011	P0A6Z8	NP_290047.1	Z4873	nikR (yhhG)	CY, Ho-4	nickel responsive regulator [Escherichia coli O157:H7 EDL933]	457 / 750 / 744 / -	15093.2	0	0	0	0	0	0	0	0	0	1129.96	4848.74	0	498.225	Cytoplasmic	Cytoplasm	133	Cytoplasmic	Cytoplasmic	Cytoplasmic	Cytoplasmic	Cytoplasmic	-	-	Regulatory functions	DNA interactions
15803301	P0A7E7	NP_289334.1	Z4095	pyrG	CY, Ho-4	CTP synthetase [Escherichia coli O157:H7 EDL933]	458 / 369 / 485 / 89	60371.9	225.596	182.425	0	0	0	0	0	451.21	1526.02	1210.5	1488.13	885.544	497.453	Cytoplasmic	Cytoplasm	545	Cytoplasmic	Cytoplasmic	Cytoplasmic	Cytoplasmic	Unknown	-	-	Purines, pyrimidines, nucleosides, and nucleotides	Pyrimidine ribonucleotide biosynthesis
15801472	Q8X559	NP_287489.1	Z2022	oppD	IM, Ht-5	oligopeptide transporter ATP-binding component [Escherichia coli O157:H7 EDL933]	459 / 776 / 754 / 252	37164	818.085	0	0	201.191	0	696.049	0	1539.55	0	2060.18	628.931	0	495.332	Cytoplasmic Membrane	Inner membrane	337	Inner Membrane	Cytoplasmic	Cytoplasmic	Cytoplasmic	Periplasmic	-	-	Transport and binding proteins	Amino acids, peptides and amines
15803862	P0A9L1	NP_289896.1	Z4707	slyD	CY, Ho-2	FKBP-type peptidyl-prolyl cis-trans isomerase [Escherichia coli O157:H7 EDL933]	460 / 263 / 308 / 611	20852.1	0	0	0	894.984	0	0	0	0	2469.77	0	2546.39	0	492.595	Cytoplasmic	Cytoplasm	196	Cytoplasmic	Cytoplasmic	Cytoplasmic	Cytoplasmic	Cytoplasmic	-	-	Protein fate	Protein folding and stabilization
15800546	Q8X7Y9	NP_286558.1	Z1015	ybhG	IM	conserved membrane protein YbhG [Escherichia coli O157:H7 EDL933]	461 / - / - / 1543	36466.98*	0	2646.38	411.121	0	0	0	336.31	0	0	342.6	317.199	1813.91	488.96	Cytoplasmic Membrane	Inner membrane	332	Inner Membrane	X	Cytoplasmic	Periplasmic	Inner Membrane	-	-	Energy metabolism	Electron transport
15803729	Q8X9J9	NP_289763.1	Z4552	murA	CY	UDP-N-acetylglucosamine 1-carboxyvinyltransferase [Escherichia coli O157:H7 EDL933]	462 / 867 / 682 / 325	44845.9	302.436	0	0	565.34	0	0	697.957	0	839.814	1914.65	1543.74	0	488.662	Cytoplasmic	Inner membrane	419	Cytoplasmic	Cytoplasmic	Cytoplasmic	Cytoplasmic	Outer Membrane	-	-	Cell envelope	Biosynthesis and degradation of murein sacculus and peptidoglycan
15800367	P0AER7	NP_286379.1	Z0803	gltK	IM, Ht-4	glutamate/aspartate transport system permease [Escherichia coli O157:H7 EDL933]	463 / - / - / -	24913.8	0	0	0	3511.87	0	1238.91	0	1088.36	0	0	0	0	486.594	Cytoplasmic Membrane	Inner membrane	224	Inner Membrane	Periplasmic	Cytoplasmic	Cytoplasmic	Inner Membrane	-	-	Transport and binding proteins	Amino acids, peptides and amines
15803921	Q8X708	NP_289957.1	Z4772	malP	CY, Ho-2	maltodextrin phosphorylase [Escherichia coli O157:H7 EDL933]	464 / 691 / 920 / 1676	90519.1	136.437	429.237	102.129	385.466	0	236.19	97.1903	0	1064.81	1307.2	648.984	1416.03	485.306	Cytoplasmic	Cytoplasm	797	Cytoplasmic	Cytoplasmic	Cytoplasmic	Cytoplasmic	Unknown	-	-	Energy metabolism	Other
15803854	P66607	NP_289888.1	Z4699	rpsG	CY, 30S Rib	30S ribosomal protein S7 [Escherichia coli O157:H7 EDL933]	465 / 549 / 165 / 9	17603.6	1419.77	0	0	979.695	0	1223.94	0	661.278	0	1529.25	0	0	484.495	Unknown	Cytoplasm	156	Cytoplasmic	Cytoplasmic	Cytoplasmic	Cytoplasmic	Cytoplasmic	-	-	Protein synthesis	Ribosomal proteins: synthesis and modification
15803759	P0A6L5	NP_289793.1	Z4583	nanA	CY, Ho-4	N-acetylneuraminate lyase [Escherichia coli O157:H7 EDL933]	466 / 205 / 799 / 1679	32592.3	0	0	458.694	756.662	0	0	0	0	1393.47	638.786	0	2527.45	481.255	Cytoplasmic	Cytoplasm	297	Cytoplasmic	Cytoplasmic	Cytoplasmic	Cytoplasmic	Cytoplasmic	-	-	Cell envelope	Biosynthesis and degradation of surface polysaccharides and lipopolysaccharides
15800365	Q8XBL8	NP_286377.1	Z0801	rihA	CY	ribonucleoside hydrolase 1 [Escherichia coli O157:H7 EDL933]	467 / 291 / 556 / 977	33835.7	0	0	0	2336.3	0	0	783.368	0	0	1625.86	0	1027.19	481.061	Unknown	Extracellular	311	Unknown	Cytoplasmic	Cytoplasmic	Cytoplasmic	Unknown	-	-	Protein synthesis	tRNA aminoacylation
15802516	Q7DBF3	NP_288542.1	Z3200	per	CY	perosamine synthetase [Escherichia coli O157:H7 EDL933]	468 / 333 / 676 / 58	41552.7	0	0	0	624.245	0	0	0	0	525.144	1956.26	1397.41	1251.46	479.543	Cytoplasmic	Cytoplasm	364	Unknown	Cytoplasmic	Cytoplasmic	Cytoplasmic	Cytoplasmic	-	-	Cell envelope	Biosynthesis and degradation of surface polysaccharides and lipopolysaccharides
15803259	Q8X7Z3	NP_289291.1	Z4050	nlpD	L (IM or OM)	lipoprotein NlpD [Escherichia coli O157:H7 EDL933]	469 / - / 306 / 1338	40170.4	0	1544.78	848.948	1040.44	0	0	703.568	0	613.592	0	775.508	0	460.57	Outer Membrane	Extracellular	379	Extracellular	Extracellular	Periplasmic	Periplasmic	Unknown	-	-	Cell envelope	Other
15801620	Q8XAZ1	NP_287637.1	Z2188	yneB	CY, Ho-10	aldolase [Escherichia coli O157:H7 EDL933]	470 / 403 / 329 / 597	31897.32*	1834.41	0	0	0	0	1267.66	0	0	0	527.533	1134.46	675.017	453.257	Unknown	Cytoplasm	291	Cytoplasmic	X	Cytoplasmic	Cytoplasmic	Cytoplasmic	-	-	Hypothetical proteins	Conserved
15800226	P0AA55	NP_286238.1	Z0642	qmcA (ybbK)	IM	membrane-anchored putative protease QmcA [Escherichia coli O157:H7 EDL933]	471 / - / - / -	33741.8	0	0	848.202	1042.03	0	1307.05	141.365	945.581	0	675.721	0	452.951	451.075	Unknown	Inner membrane	305	Unknown	Cytoplasmic	Cytoplasmic	Cytoplasmic	Inner Membrane	-	-	Unknown function	General
15801848	Q8X8K9	NP_287866.1	Z2456	ycjF	IM	conserved inner membrane protein YcjF [Escherichia coli O157:H7 EDL933]	472 / - / - / 1354	39362.86*	1060.09	403.324	0	732.012	0	918.091	369.727	0	666.547	764.66	0	484.521	449.914	Cytoplasmic Membrane	Inner membrane	353	Inner Membrane	X	Cytoplasmic	Cytoplasmic	Inner Membrane	-	-	Unclassified	Role category not yet assigned
15802832	Q8XCX0	NP_288859.1	Z3544	nuoE	CY/IM, Ht-13	NADH dehydrogenase subunit E [Escherichia coli O157:H7 EDL933]	473 / 189 / 144 / 677	18566.3	0	0	0	0	0	0	0	0	1386.75	1076.75	2298.58	563.617	443.808	Cytoplasmic	Inner membrane	166	periplasm	Cytoplasmic	Cytoplasmic	Cytoplasmic	Cytoplasmic	-	-	Energy metabolism	Aerobic
15800380	P0A760	NP_286392.1	Z0825	nagB	CY, Ho-6	glucosamine-6-phosphate deaminase [Escherichia coli O157:H7 EDL933]	474 / 217 / 773 / -	29752.64*	672.982	0	0	0	0	0	1888.71	0	0	1461.29	672.663	617.29	442.745	Cytoplasmic	Extracellular	266	Cytoplasmic	X	Cytoplasmic	Cytoplasmic	Cytoplasmic	-	-	Central intermediary metabolism	Amino sugars
15803347	P60956	NP_289380.1	Z4145	lgt	IM	phosphatidylglycerol-prolipoprotein diacylglyceryl transferase [Escherichia coli O157:H7 EDL933]	475 / - / - / -	33106.8	0	0	0	5264.78	0	0	0	0	0	0	0	0	438.732	Cytoplasmic Membrane	Inner membrane	291	Inner Membrane	Cytoplasmic	Cytoplasmic	Cytoplasmic	Inner Membrane	-	-	Protein fate	Protein modification and repair
15801464	P0AEP5	NP_287481.1	Z2012	galU	CY, Ho-4, Ho-5	UTP--glucose-1-phosphate uridylyltransferase subunit GalU [Escherichia coli O157:H7 EDL933]	476 / 313 / 249 / 152	32941.1	525.13	0	0	0	0	0	0	0	0	2158.59	919.03	1658.07	438.402	Cytoplasmic	Cytoplasm	302	Cytoplasmic	Cytoplasmic	Cytoplasmic	Cytoplasmic	Cytoplasmic	-	-	Cell envelope	Biosynthesis and degradation of surface polysaccharides and lipopolysaccharides
15803265	P0A6S6	NP_289297.1	Z4056	ftsB	IM, Ht-Mu, divisome	cell division protein FtsB [Escherichia coli O157:H7 EDL933]	477 / - / - / -	11621.6	0	2427.92	1343.59	0	0	0	0	1488.36	0	0	0	0	438.323	Cytoplasmic Membrane	Inner membrane	103	Inner Membrane	Cytoplasmic	Cytoplasmic	Periplasmic	Inner Membrane	-	-	Central intermediary metabolism	Other
15803346	P0A886	NP_289379.1	Z4144	thyA	CY, Ho-2	thymidylate synthase [Escherichia coli O157:H7 EDL933]	478 / 171 / 408 / 710	30478.7	595.479	0	0	0	0	517.023	0	403.028	0	1296.27	1845.03	550.345	433.931	Cytoplasmic	Cytoplasm	264	Cytoplasmic	Cytoplasmic	Cytoplasmic	Cytoplasmic	Cytoplasmic	-	-	Purines, pyrimidines, nucleosides, and nucleotides	2'-Deoxyribonucleotide metabolism
15799817	Q8X930	NP_285829.1	Z0144	panC	CY, Ho-2	pantoate--beta-alanine ligase [Escherichia coli O157:H7 EDL933]	479 / 121 / 464 / 1020	31566.5	0	0	0	0	0	0	232.937	0	2257.44	1280.73	1102.02	322.675	432.983	Cytoplasmic	Cytoplasm	283	Cytoplasmic	Cytoplasmic	Cytoplasmic	Cytoplasmic	Cytoplasmic	-	-	Biosynthesis of cofactors, prosthetic groups, and carriers	Pantothenate and coenzyme A
15800624	P0A8C3	NP_286638.1	Z1099	ybjQ		conserved protein YbjQ [Escherichia coli O157:H7 EDL933]	480 / 629 / 326 / 829	11436.5	2034.76	3107.2	0	0	0	0	0	0	0	0	0	0	428.496	Unknown	Periplasm	107	Unknown	Cytoplasmic	Cytoplasmic	Cytoplasmic	Cytoplasmic	-	-	Unclassified	Role category not yet assigned
15802194	Q8XDU6	NP_288216.1	Z2820	yeaD	CY	uncharacterized protein YeaD [Escherichia coli O157:H7 EDL933]	481 / 729 / 201 / 180	33589.1	0	0	0	347.686	0	0	400.771	0	0	828.864	888.117	2652.81	426.52	Cytoplasmic	Cytoplasm	301	Unknown	Cytoplasmic	Cytoplasmic	Cytoplasmic	Cytoplasmic	-	-	Unknown function	General
15800034	Q7AH91	NP_286046.1	Z0399	betB	CY, Ho-4	betaine aldehyde dehydrogenase [Escherichia coli O157:H7 EDL933]	482 / 299 / 1075 / 1388	52874.9	1441.86	0	0	0	0	0	334.146	0	1829.52	0	1486.75	0	424.357	Cytoplasmic	Cytoplasm	490	Unknown	Cytoplasmic	Cytoplasmic	Cytoplasmic	Cytoplasmic	-	-	Cellular processes	Adaptations to atypical conditions
15800145	P0A782	NP_286157.1	Z0518	nusB	CY, Ht-2	transcription antitermination protein NusB [Escherichia coli O157:H7 EDL933]	483 / 851 / 354 / 1337	15688.4	835.045	0	0	0	2122.74	723.565	0	0	0	602.827	0	766.482	420.888	Cytoplasmic	Cytoplasm	139	Cytoplasmic	Cytoplasmic	Cytoplasmic	Cytoplasmic	Cytoplasmic	-	-	Transcription	RNA processing
15799861	P65323	NP_285873.1	Z0191	lpxD	CY	UDP-3-O-[3-hydroxymyristoyl] glucosamine N-acyltransferase [Escherichia coli O157:H7 EDL933]	484 / 425 / - / 290	36023.2	0	0	0	0	0	0	0	0	889.726	773.241	3333.72	0	416.391	Cytoplasmic	Cytoplasm	341	Cytoplasmic	Cytoplasmic	Cytoplasmic	Cytoplasmic	Cytoplasmic	-	-	Cell envelope	Biosynthesis and degradation of surface polysaccharides and lipopolysaccharides
15804926	P0ADD0	NP_290968.1	Z5952	yjiX	IM, C-term lipid anchor	uncharacterized protein YjiX [Escherichia coli O157:H7 EDL933]	485 / - / - / -	7734.23*	0	0	0	4932.81	0	0	0	0	0	0	0	0	411.067	Unknown	Inner membrane	67	Unknown	X	Cytoplasmic	Extracellular	Periplasmic	-	-	Unknown function	General
15803818	P0A743	NP_289852.1	Z4661	mscL	IM, Ho-5	large-conductance mechanosensitive channel [Escherichia coli O157:H7 EDL933]	486 / - / - / 1227	14956.2	0	880.078	0	0	0	1364.45	0	1019.57	0	834.636	0	790.184	407.409	Cytoplasmic Membrane	Inner membrane	136	Inner Membrane	Cytoplasmic	Cytoplasmic	Cytoplasmic	Inner Membrane	-	-	Cellular processes	Adaptations to atypical conditions
15804955	P0A6K8	NP_290997.1	Z5985	deoB	CY	phosphopentomutase [Escherichia coli O157:H7 EDL933]	487 / 268 / 173 / 63	44368.2	0	0	0	0	0	0	0	0	0	1024.19	0	3835.33	404.96	Cytoplasmic	Cytoplasm	407	Cytoplasmic	Cytoplasmic	Cytoplasmic	Cytoplasmic	Cytoplasmic	-	-	Purines, pyrimidines, nucleosides, and nucleotides	Other
15804480	Q8X8B9	NP_290520.1	Z5433	fdhE	CY/IM, Ho-2	formate dehydrogenase accessory protein FdhE [Escherichia coli O157:H7 EDL933]	488 / 583 / 497 / 845	34687.3	1300.37	0	0	297.719	0	0	608.853	400.757	0	1569.76	284.151	397.865	404.956	Cytoplasmic	Periplasm	309	Cytoplasmic	Cytoplasmic	Cytoplasmic	Cytoplasmic	Cytoplasmic	-	-	Central intermediary metabolism	Other
15800377	P0AF25	NP_286389.1	Z0822	nagD	CY	UMP phosphatase [Escherichia coli O157:H7 EDL933]	489 / 577 / - / 507	27162	865.143	0	0	1781.23	0	749.492	0	652.326	0	0	0	789.62	403.151	Cytoplasmic	Cytoplasm	250	Unknown	Cytoplasmic	Cytoplasmic	Cytoplasmic	Cytoplasmic	-	-	Central intermediary metabolism	Amino sugars
15802231	P69803	NP_288254.1	Z2861	manY	IM, Ht-7	PTS enzyme IIC, mannose-specific [Escherichia coli O157:H7 EDL933]	490 / - / - / 535	27634.8	0	1693.55	0	0	0	0	3120.87	0	0	0	0	0	401.201	Cytoplasmic Membrane	Inner membrane	266	Inner Membrane	Cytoplasmic	Cytoplasmic	Cytoplasmic	Inner Membrane	-	-	Transport and binding proteins	Carbohydrates, organic alcohols, and acids
15804421	Q8X8L5	NP_290461.1	Z5351	metE	CY	5-methyltetrahydropteroyltriglutamate--homocysteine methyltransferase [Escherichia coli O157:H7 EDL933]	491 / 486 / 960 / 613	84719.4	2645.45	0	0	2126.51	0	0	0	0	0	0	0	0	397.663	Cytoplasmic	Cytoplasm	753	Unknown	Cytoplasmic	Cytoplasmic	Cytoplasmic	Cytoplasmic	-	-	Amino acid biosynthesis	Aspartate family
15799684	Q8XA80	NP_285696.1	Z0004	thrC	CY	threonine synthase [Escherichia coli O157:H7 EDL933]	492 / 387 / 502 / 234	47082	329.654	0	0	0	0	0	0	308.253	0	2386	511.314	1221.83	396.421	Cytoplasmic	Cytoplasm	428	Cytoplasmic	Cytoplasmic	Cytoplasmic	Cytoplasmic	Cytoplasmic	-	-	Amino acid biosynthesis	Aspartate family
161367600	Q8X660	NP_288060.2	Z2629	_	CY	putative oxidoreductase [Escherichia coli O157:H7 EDL933]	493 / 314 / 713 / -	38240.9	0	440.525	0	696.905	0	0	683.35	0	629.324	1818.15	0	463.987	394.353	Cytoplasmic	Cytoplasm	359	Unknown	Cytoplasmic	Cytoplasmic	Cytoplasmic	Unknown	-	-	Unknown function	General
15802522	Q8X7P7	NP_288548.1	Z3206	gne	CY	putative UDP-galactose 4-epimerase [Escherichia coli O157:H7 EDL933]	494 / 858 / 803 / 122	37140.9	0	560.11	624.746	120.879	0	320.649	781.957	0	0	1608.81	437.489	235.381	390.835	Cytoplasmic	Cytoplasm	331	Unknown	Periplasmic	Cytoplasmic	Cytoplasmic	Cytoplasmic	-	-	Hypothetical proteins	Conserved
161367655	Q8X945	NP_285821.2	Z0136	hpt	CY, Ho-4	hypoxanthine-guanine phosphoribosyltransferase [Escherichia coli O157:H7 EDL933]	495 / 601 / 394 / 525	20114.5	0	0	0	0	0	0	0	0	0	2116.22	1507.51	1032.43	388.014	Cytoplasmic	Cytoplasm	182	Cytoplasmic	Cytoplasmic	Cytoplasmic	Cytoplasmic	Cytoplasmic	-	-	Purines, pyrimidines, nucleosides, and nucleotides	Salvage of nucleosides and nucleotides
15802143	Q8XE12	NP_288165.1	Z2761	katE	CY, Ho-6	hydroperoxidase II [Escherichia coli O157:H7 EDL933]	496 / 487 / 1143 / -	84116.77*	562.356	191.09	0	0	0	0	524.127	0	1903.19	0	1449.95	0	385.893	Cytoplasmic	Periplasm	753	periplasm	X	Cytoplasmic	Cytoplasmic	Cytoplasmic	-	-	Cellular processes	Detoxification
15804853	P0AFA0	NP_290894.1	Z5873	lptF (yjgP)	IM, Ht-6	lipopolysaccharide ABC transporter permease protein [Escherichia coli O157:H7 EDL933]	497 / - / - / 1273	40356.2	873.556	1333.98	0	0	0	756.781	0	1635.51	0	0	0	0	383.319	Cytoplasmic Membrane	Inner membrane	366	Inner Membrane	Cytoplasmic	Cytoplasmic	Cytoplasmic	Inner Membrane	-	-	Unclassified	Role category not yet assigned
15800749	Q8X5I3	NP_286763.1	Z1230	cydC	IM, Ht-4	cysteine/glutathione ABC transporter membrane/ATP-binding component [Escherichia coli O157:H7 EDL933]	498 / - / - / 1577	62807.9	716.756	555.373	0	0	0	1581.84	254.556	340.456	0	789.698	0	333.59	381.022	Cytoplasmic Membrane	Inner membrane	573	Inner Membrane	Cytoplasmic	Cytoplasmic	Cytoplasmic	Inner Membrane	-	-	Transport and binding proteins	Other
15803833	P0A7W9	NP_289867.1	Z4676	rpsH	CY, 30S Rib	30S ribosomal protein S8 [Escherichia coli O157:H7 EDL933]	499 / 697 / 159 / 33	14126	0	0	0	429.828	0	0	0	3834.92	0	0	0	290.923	379.639	Cytoplasmic	Cytoplasm	130	Cytoplasmic	Cytoplasmic	Cytoplasmic	Cytoplasmic	Cytoplasmic	-	-	Protein synthesis	Ribosomal proteins: synthesis and modification
15801481	Q8XCB7	NP_287498.1	Z2033	yciC	IM	predicted inner membrane protein YciC [Escherichia coli O157:H7 EDL933]	500 / - / - / -	26399.9	0	2697.53	766.13	0	0	0	0	1089.75	0	0	0	0	379.451	Cytoplasmic Membrane	Inner membrane	247	Inner Membrane	Periplasmic	Cytoplasmic	Cytoplasmic	Inner Membrane	-	-	Cell envelope	Other
15803210	P69915	NP_289242.1	Z3998	csrA	CY, Ht-19	carbon storage regulator [Escherichia coli O157:H7 EDL933]	501 / 250 / 169 / 618	6855.67	1498.63	0	0	0	0	3051.26	0	0	0	0	0	0	379.158	Unknown	Cytoplasm	61	Cytoplasmic	Cytoplasmic	Cytoplasmic	Cytoplasmic	Cytoplasmic	-	-	Energy metabolism	Glycolysis/gluconeogenesis
15802859	Q8XCR6	NP_288886.1	Z3574	purF	CY, Ho-4	amidophosphoribosyltransferase [Escherichia coli O157:H7 EDL933]	502 / 723 / 761 / 1059	56499.9	0	0	0	471.933	0	0	718.907	0	0	1232.58	528.277	1577.96	377.471	Cytoplasmic	Cytoplasm	505	Cytoplasmic	Cytoplasmic	Cytoplasmic	Cytoplasmic	Cytoplasmic	-	-	Purines, pyrimidines, nucleosides, and nucleotides	Purine ribonucleotide biosynthesis
15799712	Q8XA41	NP_285724.1	Z0035	rihC (yaaF)	CY	ribonucleoside hydrolase RihC [Escherichia coli O157:H7 EDL933]	503 / 274 / 860 / 1348	32596.6	0	0	0	0	0	0	0	0	0	780.75	0	3710.36	374.259	Unknown	Extracellular	304	Unknown	Cytoplasmic	Cytoplasmic	Cytoplasmic	Unknown	-	-	Purines, pyrimidines, nucleosides, and nucleotides	Salvage of nucleosides and nucleotides
15801171	P0ACV1	NP_287188.1	Z1690	htrB	IM	lipid A biosynthesis lauroyl acyltransferase [Escherichia coli O157:H7 EDL933]	504 / - / - / -	35405.6	0	0	0	415.944	0	0	0	1997.33	0	2061.35	0	0	372.886	Cytoplasmic Membrane	Inner membrane	306	Inner Membrane	Cytoplasmic	Cytoplasmic	Cytoplasmic	Inner Membrane	-	-	Cell envelope	Biosynthesis and degradation of surface polysaccharides and lipopolysaccharides
15802742	Q8XE68	NP_288769.1	Z3445	yejK	CY	nucleoid-associated protein [Escherichia coli O157:H7 EDL933]	505 / 292 / 1258 / 794	37822	0	622.485	0	0	865.063	0	269.004	0	0	583.998	624.239	1495.28	371.673	Cytoplasmic	Periplasm	335	Cytoplasmic	Cytoplasmic	Cytoplasmic	Cytoplasmic	Cytoplasmic	-	-	Unclassified	Role category not yet assigned
15803321	P0A9S2	NP_289354.1	Z4116	fucO	CY	L-1,2-propanediol oxidoreductase [Escherichia coli O157:H7 EDL933]	506 / 275 / 243 / 645	40642.9	0	0	0	0	0	0	0	0	496.679	1146.54	557.027	2201.73	366.831	Cytoplasmic	Cytoplasm	383	Unknown	Cytoplasmic	Cytoplasmic	Cytoplasmic	Cytoplasmic	-	-	Energy metabolism	Fermentation
15803204	Q8X905	NP_289236.1	Z3986	emrA	IM, Ht-3	multidrug resistance secretion protein [Escherichia coli O157:H7 EDL933]	507 / 1077 / - / 1795	42735.3	950.509	747.048	820.764	443.668	0	554.542	0	303.594	0	232.29	0	295.707	362.344	Cytoplasmic Membrane	Inner membrane	390	Inner Membrane	Cytoplasmic	Cytoplasmic	Periplasmic	Inner Membrane	-	-	Transport and binding proteins	Other
15802068	P0AC71	NP_288090.1	Z2676	ydhD	CY, Ho-2	hypothetical protein Z2676 [Escherichia coli O157:H7 EDL933]	508 / 586 / 48 / 105	12878.3	1177.73	0	0	0	0	2032.19	0	1111.87	0	0	0	0	360.15	Unknown	Periplasm	115	Unknown	Cytoplasmic	Cytoplasmic	Cytoplasmic	Cytoplasmic	-	-	Unknown function	General
15804104	P67031	NP_290143.1	Z4983	glyS	CY, Ht-4	glycyl-tRNA synthetase subunit beta [Escherichia coli O157:H7 EDL933]	509 / 125 / 733 / 609	76799.29*	1192.36	0	0	100.73	0	72.01	624.981	0	377.214	750.078	229.26	960.26	358.907	Cytoplasmic	Cytoplasm	689	Cytoplasmic	X	Cytoplasmic	Cytoplasmic	Cytoplasmic	-	-	Protein synthesis	tRNA aminoacylation
15803843	P0A7U5	NP_289877.1	Z4687	rpsS	CY, 30S Rib	30S ribosomal protein S19 [Escherichia coli O157:H7 EDL933]	510 / 718 / 1144 / 74	10429.9	0	0	0	0	0	0	0	0	724.716	1684.93	1877.89	0	357.295	Cytoplasmic	Cytoplasm	92	Cytoplasmic	Cytoplasmic	Cytoplasmic	Periplasmic	Cytoplasmic	-	-	Protein synthesis	Ribosomal proteins: synthesis and modification
15802803	Q8XDZ5	NP_288830.1	Z3512	arnC	IM	undecaprenyl phosphate 4-deoxy-4-formamido-L-arabinose transferase [Escherichia coli O157:H7 EDL933]	511 / - / - / 801	36335.8	0	0	483.166	398.42	0	2013.29	0	1095.12	0	287.093	0	0	356.425	Cytoplasmic Membrane	Inner membrane	322	Inner Membrane	Cytoplasmic	Cytoplasmic	Cytoplasmic	Inner Membrane	-	-	Cell envelope	Biosynthesis and degradation of surface polysaccharides and lipopolysaccharides
15804375	Q8XAS7	NP_290415.1	Z5295	rfe	IM	UDP-GlcNAc:undecaprenylphosphate GlcNAc-1-phosphate transferase [Escherichia coli O157:H7 EDL933]	512 / 809 / - / -	40907.8	0	0	0	1195.05	0	1500.04	0	0	0	0	0	1564.44	354.96	Cytoplasmic Membrane	Inner membrane	367	Inner Membrane	Cytoplasmic	Cytoplasmic	Cytoplasmic	Inner Membrane	-	-	Cell envelope	Biosynthesis and degradation of surface polysaccharides and lipopolysaccharides
15800695	Q8X9Q1	NP_286709.1	Z1174	terC	IM	putative phage inhibition, colicin resistance and tellurite resistance protein [Escherichia coli O157:H7 EDL933]	513 / - / - / 1313	38391.9	0	572.094	0	514.22	0	2590.62	0	0	0	536.564	0	0	351.125	Cytoplasmic Membrane	Inner membrane	346	Inner Membrane	Cytoplasmic	Cytoplasmic	Cytoplasmic	Inner Membrane	-	-	Cellular processes	Toxin production and resistance
15800230	Q8XCZ8	NP_286242.1	Z0646	ybbO	CY	short chain dehydrogenase [Escherichia coli O157:H7 EDL933]	514 / 622 / 1413 / 956	29428.1	460.473	703.173	0	318.065	0	0	0	431.06	1162.09	0	714.223	422.367	350.954	Cytoplasmic	Cytoplasm	269	Inner Membrane	Cytoplasmic	Cytoplasmic	Cytoplasmic	Cytoplasmic	-	-	Central intermediary metabolism	Other
15802694	Q8X655	NP_288721.1	Z3393	_		putative 1,2-dioxygenase [Escherichia coli O157:H7 EDL933]	515 / 771 / - / -	38477.8	0	0	0	736.068	0	561.72	0	0	0	922.397	1979.14	0	349.943	Unknown	Periplasm	342	Unknown	Cytoplasmic	Cytoplasmic	Cytoplasmic	Periplasmic	-	-	Energy metabolism	Other
15801749	Q8X9Q5	NP_287767.1	Z2330	hslJ	L (IM or OM)	heat-inducible protein [Escherichia coli O157:H7 EDL933]	516 / 995 / - / 1594	15181.1	743.499	0	0	0	0	1462.16	0	775.199	0	1214.88	0	0	349.645	Unknown	Cytoplasm	140	Unknown	Cytoplasmic	Periplasmic	Periplasmic	Periplasmic	-	-	Cellular processes	Adaptations to atypical conditions
15802782	P69925	NP_288809.1	Z3491	nrdB	CY, Ht-4	ribonucleotide-diphosphate reductase subunit beta [Escherichia coli O157:H7 EDL933]	517 / 143 / 1278 / 905	43515.7	1510.25	0	0	0	1948.49	0	0	346.924	0	260.912	0	0	338.881	Cytoplasmic	Periplasm	376	Unknown	Cytoplasmic	Cytoplasmic	Cytoplasmic	Cytoplasmic	-	-	Purines, pyrimidines, nucleosides, and nucleotides	2'-Deoxyribonucleotide metabolism
15800820	Q8XD93	NP_286836.1	Z1312	yccF	IM	conserved inner membrane protein YccF [Escherichia coli O157:H7 EDL933]	518 / - / - / 1125	16246.8	0	0	0	0	0	0	0	4052.65	0	0	0	0	337.721	Cytoplasmic Membrane	Inner membrane	148	Unknown	Cytoplasmic	Cytoplasmic	Cytoplasmic	Inner Membrane	-	-	Unknown function	General
15800150	Q8XE76	NP_286162.1	Z0523	dxs	CY, Ho-2	1-deoxy-D-xylulose-5-phosphate synthase [Escherichia coli O157:H7 EDL933]	519 / 568 / 934 / 894	67630.3	0	0	0	228.623	0	602.85	435.314	653.801	0	501.75	1619.17	0	336.793	Cytoplasmic	Cytoplasm	620	Unknown	Cytoplasmic	Cytoplasmic	Cytoplasmic	Cytoplasmic	-	-	Biosynthesis of cofactors, prosthetic groups, and carriers	Other
15802400	Q8XB78	NP_288426.1	Z3059	hchA (yedU)	CY, Ho-2	chaperone protein HchA [Escherichia coli O157:H7 EDL933]	520 / 153 / 63 / 496	31170.93*	0	0	0	0	0	0	0	0	0	2273.37	0	1728.6	333.498	Cytoplasmic	Cytoplasm	283	Cytoplasmic	X	Cytoplasmic	Cytoplasmic	Cytoplasmic	-	-	Unclassified	Role category not yet assigned
161367481	P69426	NP_290469.2	Z5359	tatB	IM, Ht-4	sec-independent translocase [Escherichia coli O157:H7 EDL933]	521 / - / 1082 / 1472	18420	0	550.385	1227.68	1010.45	0	615.277	0	0	0	525.595	0	0	327.449	Cytoplasmic Membrane	Inner membrane	171	Inner Membrane	Periplasmic	Periplasmic	Periplasmic	Inner Membrane	-	-	Unknown function	General
15800366	P0AAG4	NP_286378.1	Z0802	gltL	IM, Ht-4	ATP-binding protein of glutamate/aspartate transport system [Escherichia coli O157:H7 EDL933]	522 / 705 / 1368 / 393	26660.1	835.996	0	0	804.136	0	502.156	405.709	529.229	0	0	809.163	0	323.866	Cytoplasmic Membrane	Inner membrane	241	Inner Membrane	Cytoplasmic	Cytoplasmic	Cytoplasmic	Cytoplasmic	-	-	Transport and binding proteins	Amino acids, peptides and amines
75994538	O82913	YP_325652.1	L7092	_	L (IM or OM)	hypothetical protein L7092 [Escherichia coli O157:H7 EDL933]	523 / - / - / -	16107.8	656.072	1026.55	0	0	0	0	0	1209.25	0	962.41	0	0	321.19	Unknown	Cytoplasm	143	Periplasmic	Inner Membrane	Periplasmic	Periplasmic	Periplasmic	Inner Membrane	-	No Data	No Data
15804355	Q8XAW3	NP_290394.1	Z5258	yieP	IM (?)	uncharacterized protein YieP [Escherichia coli O157:H7 EDL933]	524 / - / - / -	26075.1	1801.35	0	0	0	1172.12	0	0	842.799	0	0	0	0	318.023	Cytoplasmic	Cytoplasm	230	Cytoplasmic	Cytoplasmic	Cytoplasmic	Cytoplasmic	Cytoplasmic	-	-	Regulatory functions	DNA interactions
15802723	Q8XE91	NP_288750.1	Z3425	fruA	IM, Ht-4	fructose-specific PTS system IIBC component [Escherichia coli O157:H7 EDL933]	525 / - / 1190 / -	57458.6	0	835.431	452.096	378.159	0	0	0	0	0	394.908	1693.55	0	312.846	Cytoplasmic Membrane	Inner membrane	563	Inner Membrane	Cytoplasmic	Cytoplasmic	Cytoplasmic	Inner Membrane	-	-	Energy metabolism	Other
15800902	Q8XC28	NP_286918.1	Z1398	yccC	IM	cryptic autophosphorylating protein tyrosine kinase Etk [Escherichia coli O157:H7 EDL933]	526 / 965 / - / 1026	81256.7	0	540.019	296.415	242.16	0	608.531	1107.33	150.839	0	125.291	497.05	154.16	310.15	Cytoplasmic Membrane	Inner membrane	726	Inner Membrane	Cytoplasmic	Cytoplasmic	Cytoplasmic	Extracellular	-	-	Cellular processes	Toxin production and resistance
15804635	P0ABN3	NP_290676.1	Z5641	dgkA	IM, Ho-3	diacylglycerol kinase [Escherichia coli O157:H7 EDL933]	527 / - / - / -	13244.2	0	0	0	1168.44	0	1308.29	0	0	0	1220.68	0	0	308.118	Cytoplasmic Membrane	Inner membrane	122	Inner Membrane	Cytoplasmic	Cytoplasmic	Cytoplasmic	Inner Membrane	-	-	Fatty acid and phospholipid metabolism	Biosynthesis
15800345	P0A8J6	NP_286357.1	Z0776	ybeD	CY	conserved protein YbeD [Escherichia coli O157:H7 EDL933]	528 / - / 99 / 42	9827.01	0	0	0	0	0	0	0	0	0	0	3694.29	0	307.858	Cytoplasmic	Periplasm	87	Unknown	Cytoplasmic	Cytoplasmic	Cytoplasmic	Cytoplasmic	-	-	Unknown function	General
15803734	P64608	NP_289768.1	Z4557	yrbE (mlaE)	IM, Ht-8	probable phospholipid ABC transporter permease protein MlaE [Escherichia coli O157:H7 EDL933]	529 / - / - / -	27862.2	0	0	0	0	0	1609.31	0	0	0	2017.81	0	0	302.26	Cytoplasmic Membrane	Inner membrane	260	Inner Membrane	Cytoplasmic	Cytoplasmic	Extracellular	Inner Membrane	-	-	Cellular processes	Toxin production and resistance
15802115	P0A8A6	NP_288137.1	Z2732	ydiA	CY, Ho-4	putative phosphotransferase YdiA [Escherichia coli O157:H7 EDL933]	530 / - / 814 / 78	31209.7	1955.2	0	0	0	0	392.091	0	0	0	269.266	1008.44	0	302.083	Cytoplasmic	Cytoplasm	277	Cytoplasmic	Cytoplasmic	Cytoplasmic	Cytoplasmic	Cytoplasmic	-	-	Unknown function	General
75994506	O82891	YP_325620.1	L7060	_		uncharacterized protein L7060 [Escherichia coli O157:H7 EDL933]	531 / 454 / 1174 / -	25232.7	553.461	158.081	0	0	0	0	1176.65	0	0	0	1730.84	0	301.586	Cytoplasmic	Cytoplasm	227	Cytoplasmic	Unknown	Cytoplasmic	Cytoplasmic	Cytoplasmic	Cytoplasmic	-	No Data	No Data
15804734	P0A6G1	NP_290775.1	Z5747	groES	CY, Ho-7	co-chaperonin GroES [Escherichia coli O157:H7 EDL933]	532 / 1 / 3 / 149	10386.6	1234.79	0	793.458	0	0	0	846.715	0	0	737.054	0	0	301.001	Cytoplasmic	Cytoplasm	97	Cytoplasmic	Cytoplasmic	Cytoplasmic	Cytoplasmic	Cytoplasmic	-	-	Protein fate	Protein folding and stabilization
15802072	P0ACP8	NP_288094.1	Z2681	purR	CY, Ho-2	DNA-binding transcriptional repressor PurR [Escherichia coli O157:H7 EDL933]	533 / 844 / 922 / 996	38173.3	0	0	0	0	0	630.942	0	307.911	457.273	526.501	0	1685.08	300.642	Cytoplasmic	Cytoplasm	341	Cytoplasmic	Cytoplasmic	Cytoplasmic	Cytoplasmic	Cytoplasmic	-	-	Purines, pyrimidines, nucleosides, and nucleotides	Purine ribonucleotide biosynthesis
15804745	P0A8Q4	NP_290786.1	Z5758	frdD	IM, Ht-4	fumarate reductase subunit D [Escherichia coli O157:H7 EDL933]	534 / - / - / -	13106.5	0	1261.24	0	917.78	0	1414.7	0	0	0	0	0	0	299.477	Cytoplasmic Membrane	Inner membrane	119	Inner Membrane	Cytoplasmic	Cytoplasmic	Cytoplasmic	Inner Membrane	-	-	Energy metabolism	Anaerobic
15803132	P0AGD9	NP_289163.1	Z3904	ffh	CY, Ht-3	signal recognition particle protein [Escherichia coli O157:H7 EDL933]	535 / 1084 / 774 / 423	49785.4	0	379.928	0	0	302.64	863.952	0	229.66	660.171	359.389	576.809	215.185	298.978	Unknown/Multiple Localization	Inner membrane	453	Cytoplasmic	Cytoplasmic	Cytoplasmic	Periplasmic	Cytoplasmic	-	-	Protein fate	Protein and peptide secretion and trafficking
15802508	Q7DBF8	NP_288534.1	Z3191	gnd	CY, Ho-2	6-phosphogluconate dehydrogenase [Escherichia coli O157:H7 EDL933]	536 / 35 / 356 / 692	51475.3	256.636	0	0	0	0	222.712	177.853	235.876	0	1491.11	0	1193.08	298.106	Cytoplasmic	Cytoplasm	468	Cytoplasmic	Cytoplasmic	Cytoplasmic	Cytoplasmic	Unknown	-	-	Energy metabolism	Pentose phosphate pathway
15800386	P0A9B1	NP_286398.1	Z0831	fur	CY, Ho-2	ferric uptake regulator [Escherichia coli O157:H7 EDL933]	537 / 588 / 246 / 271	16794.3	0	0	0	0	0	0	0	0	0	1303.4	1396.02	825.89	293.776	Cytoplasmic	Cytoplasm	148	Cytoplasmic	Cytoplasmic	Cytoplasmic	Cytoplasmic	Cytoplasmic	-	-	Regulatory functions	Other
15803108	P0AGJ6	NP_289139.1	Z3865	yfiF	CY	putative methyltransferase [Escherichia coli O157:H7 EDL933]	538 / 618 / 1149 / 265	37770.32*	431.228	0	0	0	0	749.944	0	0	0	937.015	1338.26	0	288.038	Cytoplasmic	Cytoplasm	345	Cytoplasmic	X	Cytoplasmic	Periplasmic	Cytoplasmic	-	-	Unknown function	General
15801471	P0AFH7	NP_287488.1	Z2021	oppC	IM, Ht-5	oligopeptide transport permease protein [Escherichia coli O157:H7 EDL933]	539 / - / - / 1596	33020.7	0	896.81	0	0	0	0	821.735	0	0	1731.85	0	0	287.533	Cytoplasmic Membrane	Inner membrane	302	Inner Membrane	Cytoplasmic	Cytoplasmic	Cytoplasmic	Inner Membrane	-	-	Transport and binding proteins	Amino acids, peptides and amines
15802317	Q8XCD3	NP_288343.1	Z2964	yecA		conserved metal-binding protein YecA [Escherichia coli O157:H7 EDL933]	540 / 322 / 227 / 247	24980.3	0	0	0	0	0	0	0	0	2087.09	1356.23	0	0	286.943	Cytoplasmic	Cytoplasm	221	Inner Membrane	Cytoplasmic	Cytoplasmic	Cytoplasmic	Cytoplasmic	-	-	Unclassified	Role category not yet assigned
161367465	P58130	NP_290675.2	Z5640	plsB	IM	glycerol-3-phosphate acyltransferase [Escherichia coli O157:H7 EDL933]	541 / 1123 / - / 307	91393.77*	351.409	0	0	970.135	0	608.312	0	158.792	0	1012.29	0	323.176	285.343	Cytoplasmic Membrane	Inner membrane	807	Inner Membrane	X	Cytoplasmic	Cytoplasmic	Cytoplasmic	-	-	Fatty acid and phospholipid metabolism	Biosynthesis
15800225	Q8XD05	NP_286237.1	Z0641	ybbJ	IM	conserved inner membrane protein YbbJ [Escherichia coli O157:H7 EDL933]	542 / - / - / -	16892.3	0	0	0	0	0	0	0	0	0	1813.65	0	1592.79	283.87	Cytoplasmic Membrane	Inner membrane	152	Inner Membrane	Cytoplasmic	Cytoplasmic	Cytoplasmic	Inner Membrane	-	-	Hypothetical proteins	Conserved
15799844	Q8X8Y9	NP_285856.1	Z0171	dgt	CY, Ho-4	deoxyguanosinetriphosphate triphosphohydrolase [Escherichia coli O157:H7 EDL933]	543 / 1159 / - / 1647	59320.7	0	191.082	0	0	0	214.867	530.657	0	317.232	179.799	782.786	1164.76	281.766	Cytoplasmic	Cytoplasm	505	Unknown	Cytoplasmic	Cytoplasmic	Cytoplasmic	Cytoplasmic	-	-	Central intermediary metabolism	Other
15803541	P0AAJ9	NP_289574.1	Z4350	hybA	IM	hydrogenase 2 protein HybA [Escherichia coli O157:H7 EDL933]	544 / - / 1297 / 1468	36006.48*	0	0	0	128.071	0	297.441	0	0	1795.7	503.375	0	650.426	281.251	Cytoplasmic Membrane	Periplasm	328	Inner Membrane	X	Periplasmic	Periplasmic	Periplasmic	-	-	Energy metabolism	Anaerobic
157267361	Q8X7L5	NP_288572.2	Z3232	asmA	PP	putative assembly protein [Escherichia coli O157:H7 EDL933]	545 / - / 1384 / -	68949.34*	478.785	185.063	200.878	867.84	0	653.068	0	0	0	724.439	0	216.997	277.256	Unknown	Periplasm	617	periplasm	X	Periplasmic	Periplasmic	Periplasmic	-	-	Cell envelope	Other
15802563	Q8X7H8	NP_288590.1	Z3251	yegR	L (IM or OM)	predicted protein YegR [Escherichia coli O157:H7 EDL933]	546 / 948 / - / -	13835.5	0	1447.71	0	0	0	534.934	0	584.907	0	0	739.716	0	275.606	Unknown	Cytoplasm	125	Unknown	Cytoplasmic	Cytoplasmic	Cytoplasmic	Cytoplasmic	-	-	Hypothetical proteins	Conserved
15800143	Q8XE88	NP_286155.1	Z0515	ribD	CY, Ho-2	bifunctional diaminohydroxyphosphoribosylaminopyrimidine deaminase/5-amino-6-(5-phosphoribosylamino)uracil reductase [Escherichia coli O157:H7 EDL933]	547 / 502 / 581 / -	40362.8	0	0	0	0	0	0	0	0	1048.68	698.913	659.083	895.027	275.142	Cytoplasmic	Cytoplasm	367	Cytoplasmic	Cytoplasmic	Cytoplasmic	Cytoplasmic	Cytoplasmic	-	-	Biosynthesis of cofactors, prosthetic groups, and carriers	Riboflavin, FMN, and FAD
15801652	Q8XAU0	NP_287670.1	Z2225	_	IM	ATP-dependent peptide transporter membrane subunit [Escherichia coli O157:H7 EDL933]	548 / - / 879 / -	31945.43*	0	0	3300.07	0	0	0	0	0	0	0	0	0	275.006	Cytoplasmic Membrane	Inner membrane	298	Inner Membrane	X	Cytoplasmic	Cytoplasmic	Inner Membrane	-	-	Energy metabolism	Electron transport
15804984	Q8XCM4	NP_288268.1	Z2878m	proQ	CY	putative solute/DNA competence effector [Escherichia coli O157:H7 EDL933]	549 / - / 634 / 119	25833.3	0	0	461.73	377.673	0	475.254	383.78	0	0	1589.05	0	0	273.957	Cytoplasmic	Periplasm	232	Cytoplasmic	Cytoplasmic	Cytoplasmic	Periplasmic	Cytoplasmic	-	-	No Data	No Data
15800228	Q8XD04	NP_286240.1	Z0644	ybbM	IM	putative metal resistance protein [Escherichia coli O157:H7 EDL933]	550 / 950 / - / -	29245.1	0	698.806	0	0	0	786.661	0	1780.33	0	0	0	0	272.15	Cytoplasmic Membrane	Inner membrane	268	Inner Membrane	Cytoplasmic	Cytoplasmic	Cytoplasmic	Inner Membrane	-	-	Cell envelope	Other
15800108	P0AAP0	NP_286120.1	Z0478	iraP (yaiB)	CY	anti-adapter protein iraP [Escherichia coli O157:H7 EDL933]	551 / 686 / 415 / 245	9937.14	0	0	0	0	0	0	0	0	0	912.859	0	2290.39	266.937	Unknown	Nucleoid	86	Unknown	Cytoplasmic	Cytoplasmic	Cytoplasmic	Cytoplasmic	-	-	Hypothetical proteins	Conserved
15803131	P0A7T5	NP_289162.1	Z3903	rpsP	CY, 30S Rib	30S ribosomal protein S16 [Escherichia coli O157:H7 EDL933]	552 / 405 / 347 / 80	9190.17	0	0	0	0	0	0	0	0	0	3152.01	0	0	262.667	Cytoplasmic	Extracellular	82	Unknown	Cytoplasmic	Cytoplasmic	Cytoplasmic	Cytoplasmic	-	-	Protein synthesis	Ribosomal proteins: synthesis and modification
15803918	P63022	NP_289954.1	Z4769	nfuA (yhgI)	CY, Ho-2	iron-sulfur cluster scaffold protein NfuA [Escherichia coli O157:H7 EDL933]	553 / 188 / 126 / 171	20996.9	1839.22	0	0	0	0	0	643.664	0	0	663.607	0	0	262.208	Cytoplasmic	Inner membrane	191	Unknown	Cytoplasmic	Cytoplasmic	Cytoplasmic	Cytoplasmic	-	-	Unknown function	General
15799863	Q8X8X8	NP_285875.1	Z0193	lpxA	CY, Ho-3	UDP-N-acetylglucosamine acyltransferase [Escherichia coli O157:H7 EDL933]	554 / 140 / 859 / 369	28048.9	0	0	0	232.731	0	660.755	0	667.501	907.763	0	0	663.976	261.06	Cytoplasmic	Cytoplasm	262	Cytoplasmic	Cytoplasmic	Cytoplasmic	Cytoplasmic	Cytoplasmic	-	-	Cell envelope	Biosynthesis and degradation of surface polysaccharides and lipopolysaccharides
15803047	Q8XA93	NP_289077.1	Z3787	(yfhM)	L (IM or OM)	α-macroglobulin [Escherichia coli O157:H7 EDL933]	555 / - / 1462 / 1869	181409	77.9893	352.258	0	254.035	0	477.917	0	606.636	0	596.414	0	763.538	260.732	Unknown/Multiple Localization	Periplasm	1653	Unknown	Periplasmic	Periplasmic	Periplasmic	Outer Membrane	-	-	Unclassified	Role category not yet assigned
15800372	Q8XBK1	NP_286384.1	Z0808	ybeY	CY	putative metalloprotease [Escherichia coli O157:H7 EDL933]	556 / - / 351 / 991	17557.1	0	0	0	0	0	0	0	0	0	3128.18	0	0	260.682	Cytoplasmic	Periplasm	155	Unknown	Cytoplasmic	Cytoplasmic	Cytoplasmic	Cytoplasmic	-	-	Hypothetical proteins	Conserved
15804362	Q8XAV1	NP_290402.1	Z5282	ilvD	CY, Ho-2	dihydroxy-acid dehydratase [Escherichia coli O157:H7 EDL933]	557 / 447 / 949 / 617	65572.9	448.87	0	0	927.816	0	192.956	469.897	421.813	0	321.968	340.018	0	260.278	Cytoplasmic	Cytoplasm	616	Unknown	Cytoplasmic	Cytoplasmic	Cytoplasmic	Cytoplasmic	-	-	Amino acid biosynthesis	Pyruvate family
15802240	Q8X4G6	NP_288263.1	Z2873	(yobH)	IM	uncharacterized membrane protein yobH [Escherichia coli O157:H7 EDL933]	558 / - / - / -	8585.92	0	0	0	462.994	0	2658.91	0	0	0	0	0	0	260.159	Cytoplasmic Membrane	Inner membrane	79	Unknown	Cytoplasmic	Cytoplasmic	Cytoplasmic	Inner Membrane	-	-	Hypothetical proteins	Conserved
161367589	Q8XBC7	NP_288380.2	Z3008	yedO	CY, Ho-2	D-cysteine desulfhydrase [Escherichia coli O157:H7 EDL933]	559 / 213 / 834 / 914	35180	0	0	0	0	0	0	327.956	0	1420.93	401.383	862.743	0	251.085	Cytoplasmic	Cytoplasm	328	Cytoplasmic	Cytoplasmic	Cytoplasmic	Cytoplasmic	Cytoplasmic	-	-	Unclassified	Role category not yet assigned
15802942	Q8XBM6	NP_288971.1	Z3675	yfeH	IM	putative cytochrome oxidase [Escherichia coli O157:H7 EDL933]	560 / - / - / -	36374.4	0	1068.91	0	967.001	0	0	976.328	0	0	0	0	0	251.02	Cytoplasmic Membrane	Inner membrane	332	Inner Membrane	Cytoplasmic	Cytoplasmic	Cytoplasmic	Inner Membrane	-	-	Cell envelope	Other
15803059	Q8XA83	NP_289089.1	Z3799	(trmJ)	CY, Ho-2	tRNA (cytidine/uridine-2'-O-)-methyltransferase TrmJ [Escherichia coli O157:H7 EDL933]	561 / 481 / 703 / 1042	26917.8	0	0	0	0	0	0	0	1475.1	0	438.094	1086.65	0	249.988	Cytoplasmic	Cytoplasm	245	Cytoplasmic	Cytoplasmic	Cytoplasmic	Cytoplasmic	Cytoplasmic	-	-	Protein synthesis	tRNA and rRNA base modification
15799848	Q8X8Y7	NP_285860.1	Z0176	dapD	CY, Ho-2, Ho-3	2,3,4,5-tetrahydropyridine-2-carboxylate N-succinyltransferase [Escherichia coli O157:H7 EDL933]	562 / 55 / 119 / 357	29876.9	1454.82	0	0	125.778	0	754.308	202.087	260.787	0	193.434	0	0	249.268	Cytoplasmic	Cytoplasm	274	Cytoplasmic	Cytoplasmic	Cytoplasmic	Cytoplasmic	Cytoplasmic	-	-	Amino acid biosynthesis	Aspartate family
15804823	Q8XEI2	NP_290864.1	Z5843	yjfG	CY	UDP-N-acetylmuramate:L-alanyl-gamma-D-glutamyl-meso-diaminopimelat e ligase [Escherichia coli O157:H7 EDL933]	563 / 261 / 785 / 331	49877.3	0	0	0	0	0	0	0	0	0	1067.71	1529.07	388.285	248.755	Cytoplasmic	Cytoplasm	457	Cytoplasmic	Cytoplasmic	Cytoplasmic	Cytoplasmic	Periplasmic	-	-	Cell envelope	Biosynthesis and degradation of murein sacculus and peptidoglycan
15799942	Q8X7N8	NP_285954.1	Z0298	pepD	CY, Ho-2	aminoacyl-histidine dipeptidase (peptidase D) [Escherichia coli O157:H7 EDL933]	564 / 77 / 334 / 500	52915.4	1236.74	0	0	0	234.005	257.162	647.078	0	0	219.84	385.873	0	248.391	Cytoplasmic	Extracellular	485	Extracellular	Cytoplasmic	Cytoplasmic	Cytoplasmic	Cytoplasmic	-	-	Protein fate	Degradation of proteins, peptides, and glycopeptides
15800791	P58694	NP_286805.1	Z1278	asnC	CY, Ho-2	asparaginyl-tRNA synthetase [Escherichia coli O157:H7 EDL933]	565 / 93 / 398 / 311	52612.3	2332.83	0	0	0	335.781	174.331	0	0	0	0	0	108.621	245.963	Cytoplasmic	Cytoplasm	466	Cytoplasmic	Cytoplasmic	Cytoplasmic	Cytoplasmic	Cytoplasmic	-	-	Protein synthesis	tRNA aminoacylation
15800553	P58409	NP_286565.1	Z1022	ybiC	CY	predicted dehydrogenase YbiC [Escherichia coli O157:H7 EDL933]	566 / 154 / 623 / 305	38930.39*	669.433	0	0	0	1705.78	572.948	0	0	0	0	0	0	245.68	Cytoplasmic	Cytoplasm	361	Cytoplasmic	X	Cytoplasmic	Cytoplasmic	Periplasmic	-	-	Central intermediary metabolism	Other
15804711	Q8XDU1	NP_290752.1	Z5721	melA	CY, Ho-2	alpha-galactosidase [Escherichia coli O157:H7 EDL933]	567 / 472 / 1105 / 936	50573.82*	2244.08	0	0	0	0	336.532	367.116	0	0	0	0	0	245.644	Cytoplasmic	Periplasm	451	Unknown	X	Cytoplasmic	Cytoplasmic	Cytoplasmic	-	-	Energy metabolism	Other
15804144	Q8X4I7	NP_290183.1	Z5027	_		hypothetical protein Z5027 [Escherichia coli O157:H7 EDL933]	568 / 807 / - / -	6098.3	0	0	2936.51	0	0	0	0	0	0	0	0	0	244.709	Unknown	Inner membrane	52	Unknown	Cytoplasmic	Cytoplasmic	Cytoplasmic	Unknown	-	-	No Data	No Data
15802790	P0A9C1	NP_288817.1	Z3499	glpA	CY/IM, Ht-3	sn-glycerol-3-phosphate dehydrogenase subunit A [Escherichia coli O157:H7 EDL933]	569 / 746 / 940 / 55	59035.57*	1124.83	517.758	180.263	309.199	0	0	156.485	0	281.97	161.01	0	204.967	244.707	Cytoplasmic	Cytoplasm	542	Cytoplasmic	X	Cytoplasmic	Cytoplasmic	Cytoplasmic	-	-	Energy metabolism	Anaerobic
15804433	P58194	NP_290473.1	Z5364	yigC	CY/IM, Ho-6	3-octaprenyl-4-hydroxybenzoate decarboxylase [Escherichia coli O157:H7 EDL933]	570 / 578 / 1428 / -		875.746	0	0	159.311	0	0	1224.2	0	0	629.671	0	0	240.744	Cytoplasmic	Inner membrane	497	Unknown	Cytoplasmic	Cytoplasmic	Cytoplasmic	Cytoplasmic	-	-	Hypothetical proteins	Conserved
15802513	Q7DBF6	NP_288539.1	Z3197	fcI	CY	fucose synthetase [Escherichia coli O157:H7 EDL933]	571 / 758 / 782 / 131		0	0	0	0	0	0	0	0	0	1472.12	0	1411.06	240.265	Cytoplasmic	Cytoplasm	321	Cytoplasmic	Cytoplasmic	Cytoplasmic	Cytoplasmic	Cytoplasmic	-	-	Cell envelope	Biosynthesis and degradation of surface polysaccharides and lipopolysaccharides
15802154	Q8XDZ4	NP_288176.1	Z2775	spy	PP	periplasmic protein [Escherichia coli O157:H7 EDL933]	572 / 331 / 592 / 1694	18170.3	0	0	0	0	0	0	0	0	913.152	0	1965.61	0	239.897	Periplasmic	Periplasm	161	periplasm	Periplasmic	Periplasmic	Periplasmic	Periplasmic	-	-	Unknown function	General
15804152	P0A6S9	NP_290191.1	Z5035	gpsA	CY, Ho-2	NAD(P)H-dependent glycerol-3-phosphate dehydrogenase [Escherichia coli O157:H7 EDL933]	573 / 934 / 472 / 1558	36360.2	0	0	0	0	0	0	0	0	830.083	0	2043.17	0	239.438	Cytoplasmic	Cytoplasm	339	Cytoplasmic	Cytoplasmic	Cytoplasmic	Cytoplasmic	Cytoplasmic	-	-	Energy metabolism	Other
161367637	Q8XE61	NP_286177.2	Z0539	bolA	CY	transcriptional regulator BolA [Escherichia coli O157:H7 EDL933]	574 / 690 / 286 / 616	11993.2	2859.4	0	0	0	0	0	0	0	0	0	0	0	238.283	Unknown	Cytoplasm	116	Cytoplasmic	Cytoplasmic	Cytoplasmic	Cytoplasmic	Cytoplasmic	-	-	No Data	No Data
15804425	P0A888	NP_290465.1	Z5355	ubiE	IM (?)	ubiquinone/menaquinone biosynthesis methyltransferase [Escherichia coli O157:H7 EDL933]	575 / - / - / 317	28072.1	0	0	0	0	0	0	0	0	0	733.76	711.288	1409.48	237.877	Cytoplasmic	Cytoplasm	251	Cytoplasmic	Cytoplasmic	Cytoplasmic	Cytoplasmic	Cytoplasmic	-	-	Biosynthesis of cofactors, prosthetic groups, and carriers	Menaquinone and ubiquinone
15804430	P69424	NP_290470.1	Z5360	tatC	IM, Ho-Mu, Ht-4	TatABCE protein translocation system subunit [Escherichia coli O157:H7 EDL933]	576 / - / - / -	28875.2	0	0	0	1394.36	0	0	0	0	0	1456.71	0	0	237.589	Cytoplasmic Membrane	Inner membrane	258	Inner Membrane	Cytoplasmic	Cytoplasmic	Cytoplasmic	Inner Membrane	-	-	Protein fate	Protein and peptide secretion and trafficking
15802124	P0A6X9	NP_288146.1	Z2741	ihfA	CY, Ht-2	integration host factor subunit alpha [Escherichia coli O157:H7 EDL933]	577 / 161 / 46 / 919	11353.5	2170.48	0	0	0	0	0	0	0	0	0	0	658.508	235.749	Cytoplasmic	Cytoplasm	99	Cytoplasmic	Cytoplasmic	Cytoplasmic	Cytoplasmic	Cytoplasmic	-	-	DNA metabolism	DNA replication, recombination, and repair
15803252	Q9S6P8	NP_289284.1	Z4043	mutS	CY	DNA mismatch repair protein [Escherichia coli O157:H7 EDL933]	578 / 947 / 1328 / 651	95277.02*	299.665	0	0	437.034	626.475	0	0	447.767	1008.47	0	0	0	234.951	Cytoplasmic	Cytoplasm	853	Cytoplasmic	X	Cytoplasmic	Cytoplasmic	Cytoplasmic	-	-	DNA metabolism	DNA replication, recombination, and repair
15801907	Q8X7C4	NP_287927.1	Z2538	sohB	IM	putative periplasmic protease [Escherichia coli O157:H7 EDL933]	579 / - / 1261 / 1033	39381	162.713	0	0	715.665	0	599.292	0	0	0	997.278	0	314.714	232.472	Cytoplasmic Membrane	Extracellular	349	Unknown	Cytoplasmic	Cytoplasmic	Cytoplasmic	Inner Membrane	-	-	Energy metabolism	Electron transport
15801409	P0A8V8	NP_287426.1	Z1950	fadR	CY, Ho-2	fatty acid metabolism regulator [Escherichia coli O157:H7 EDL933]	580 / 700 / 1046 / 1451	26967.6	0	0	0	354.23	0	0	717.529	0	0	740.95	0	947.244	229.996	Cytoplasmic	Cytoplasm	239	Cytoplasmic	Cytoplasmic	Cytoplasmic	Cytoplasmic	Cytoplasmic	-	-	Fatty acid and phospholipid metabolism	Degradation
15802858	P0AG04	NP_288885.1	Z3573	ubiX	CY	3-octaprenyl-4-hydroxybenzoate carboxy-lyase [Escherichia coli O157:H7 EDL933]	581 / 613 / 976 / 1423	20694.2	390.667	0	0	0	2356.58	0	0	0	0	0	0	0	228.937	Unknown	Cytoplasm	189	Unknown	Cytoplasmic	Cytoplasmic	Cytoplasmic	Cytoplasmic	-	-	Biosynthesis of cofactors, prosthetic groups, and carriers	Heme, porphyrin, and cobalamin
15804511	Q8X7A3	NP_290551.1	Z5467	yiiS		hypothetical protein Z5467 [Escherichia coli O157:H7 EDL933]	582 / 814 / 94 / 793	10745.7	0	0	0	0	0	0	0	0	0	1697.28	0	1045.42	228.558	Unknown	Cytoplasm	99	Unknown	Periplasmic	Cytoplasmic	Periplasmic	Cytoplasmic	-	-	Hypothetical proteins	Conserved
15800073	Q8X685	NP_286085.1	Z0440	lacZ	CY, Ho-4	beta-D-galactosidase [Escherichia coli O157:H7 EDL933]	583 / - / - / 1773	116405	376.313	452.685	156.414	132.31	0	0	687.248	0	498.952	282.113	0	147.746	227.815	Unknown	Cytoplasm	1024	Extracellular	Cytoplasmic	Cytoplasmic	Cytoplasmic	Outer Membrane	-	-	Unclassified	Role category not yet assigned
15803607	P68681	NP_289640.1	Z4418	rpsU	CY, 30S Rib	30S ribosomal protein S21 [Escherichia coli O157:H7 EDL933]	584 / - / 704 / 416	8499.58	664.709	0	0	0	0	0	0	0	0	0	2059.97	0	227.056	Cytoplasmic	Cytoplasm	71	Unknown	Cytoplasmic	Cytoplasmic	Extracellular	Cytoplasmic	-	-	Protein synthesis	Ribosomal proteins: synthesis and modification
15801901	Q8X7C7	NP_287921.1	Z2532	acnA	CY, Ho-2	aconitate hydratase [Escherichia coli O157:H7 EDL933]	585 / 329 / 917 / 93	97655.3	321.759	122.061	0	444.095	0	138.661	102.479	138.623	177.8	695.087	282.927	296.62	226.676	Cytoplasmic	Cytoplasm	891	Unknown	Cytoplasmic	Cytoplasmic	Cytoplasmic	Cytoplasmic	-	-	Energy metabolism	TCA cycle
15804292	Q8XBZ4	NP_290331.1	Z5189	yidB		putative uncharacterized protein YidB [Escherichia coli O157:H7 EDL933]	586 / 444 / 434 / -	14169.7	0	0	0	0	0	2699.04	0	0	0	0	0	0	224.92	Unknown	Cytoplasm	135	Unknown	Cytoplasmic	Cytoplasmic	Extracellular	Cytoplasmic	-	-	Hypothetical proteins	Conserved
15802137	Q8XE18	NP_288159.1	Z2755	_	IM	uncharacterized protein Z2755 [Escherichia coli O157:H7 EDL933]	587 / - / - / -	20476.31*	0	1301.54	0	0	0	1384.59	0	0	0	0	0	0	223.843	Cytoplasmic Membrane	Inner membrane	178	Inner Membrane	X	Cytoplasmic	Cytoplasmic	Inner Membrane	-	-	Hypothetical proteins	Conserved
15802515	Q7DBF4	NP_288541.1	Z3199	wbdP	CY	glycosyl transferase [Escherichia coli O157:H7 EDL933]	588 / - / 1256 / 272	46609.1	0	159.609	0	594.741	0	0	173.338	0	1031.31	169.543	0	523.244	220.982	Cytoplasmic	Cytoplasm	404	Unknown	Cytoplasmic	Cytoplasmic	Cytoplasmic	Cytoplasmic	-	-	Cell envelope	Biosynthesis and degradation of surface polysaccharides and lipopolysaccharides
15803707	Q8X9M2	NP_289741.1	Z4526	rpsO	CY, 30S Rib	30S ribosomal protein S15 [Escherichia coli O157:H7 EDL933]	589 / 417 / 693 / 839	10296.4	0	0	0	0	0	0	0	0	0	2649.24	0	0	220.77	Cytoplasmic	Cytoplasm	89	Cytoplasmic	Cytoplasmic	Cytoplasmic	Cytoplasmic	Cytoplasmic	-	-	Protein synthesis	Ribosomal proteins: synthesis and modification
15804568	P0A6I5	NP_290609.1	Z5545	coaA	CY, Ho-2	pantothenate kinase [Escherichia coli O157:H7 EDL933]	590 / 1025 / - / 1035	35427.4	359.218	274.274	0	746.841	434.418	289.479	0	0	0	256.748	0	285.588	220.547	Cytoplasmic	Cytoplasm	316	Cytoplasmic	Cytoplasmic	Cytoplasmic	Cytoplasmic	Cytoplasmic	-	-	Biosynthesis of cofactors, prosthetic groups, and carriers	Pantothenate and coenzyme A
15801392	Q8X4J2	NP_287409.1	Z1932	_		uncharacterized protein Z1932 [Escherichia coli O157:H7 EDL933]	591 / 636 / 1109 / 933	12549	0	0	0	784.723	0	0	0	1064.34	0	756.468	0	0	217.128	Unknown	Cytoplasm	111	Cytoplasmic	Cytoplasmic	Cytoplasmic	Periplasmic	Cytoplasmic	-	-	No Data	No Data
15802804	Q8XDZ3	NP_288831.1	Z3513	arnA	CY, Ho-6	bifunctional UDP-glucuronic acid decarboxylase/UDP-4-amino-4-deoxy-L-arabinose formyltransferase [Escherichia coli O157:H7 EDL933]	592 / - / 1004 / 142	74207.1	527.864	0	0	0	0	0	0	0	0	750.351	816.53	485.601	215.029	Cytoplasmic	Cytoplasm	660	Cytoplasmic	Cytoplasmic	Cytoplasmic	Cytoplasmic	Unknown	-	-	Purines, pyrimidines, nucleosides, and nucleotides	Purine ribonucleotide biosynthesis
15804877	Q8XC75	NP_290918.1	Z5898	_		hypothetical protein Z5898 [Escherichia coli O157:H7 EDL933]	593 / 1124 / 1478 / 842	237047	419.062	413.384	252.421	329.982	0	258.665	292.872	281.428	0	172.126	92.2338	0	209.348	Cytoplasmic Membrane	Cytoplasm	2104	Cytoplasmic	Cytoplasmic	Cytoplasmic	Cytoplasmic	Outer Membrane	-	-	Unclassified	Role category not yet assigned
15804415	P0AG39	NP_290455.1	Z5344	rhtC	IM	threonine efflux protein [Escherichia coli O157:H7 EDL933]	594 / - / - / -	13294.2	0	0	0	869.892	0	0	0	0	0	401.229	0	1224.84	207.997	Cytoplasmic Membrane	Inner membrane	206	Inner Membrane	Cytoplasmic	Cytoplasmic	Cytoplasmic	Cytoplasmic	-	-	Energy metabolism	Electron transport
15803741	P0A9V3	NP_289775.1	Z4564	lptB (yhbG)	IM, Ht-6	lipopolysaccharide ABC transporter ATP-binding protein [Escherichia coli O157:H7 EDL933]	595 / - / 998 / 309	26799.6	0	0	0	335.33	0	0	0	0	0	1763.61	0	394.121	207.755	Cytoplasmic Membrane	Inner membrane	241	Unknown	Cytoplasmic	Cytoplasmic	Cytoplasmic	Cytoplasmic	-	-	Transport and binding proteins	Unknown substrate
15800810	Q8XDA7	NP_286826.1	Z1301	pqiB	CY/IM	paraquat-inducible protein B [Escherichia coli O157:H7 EDL933]	596 / - / 1288 / 1614	60477.1	0	545.638	0	0	0	1039.75	0	905	0	0	0	0	207.532	Unknown	Cytoplasm	546	Unknown	Periplasmic	Cytoplasmic	Periplasmic	Inner Membrane	-	-	Unknown function	General
15802162	Q8XDY3	NP_288184.1	Z2783	ydjY	L (IM or OM)	uncharacterized protein YdjY [Escherichia coli O157:H7 EDL933]	597 / - / - / 1757	30511.35*	0	1189.48	0	0	0	0	1083.39	0	0	207.79	0	0	206.722	Periplasmic	Extracellular	279	Unknown	X	Periplasmic	Extracellular	Extracellular	-	-	Hypothetical proteins	Conserved
15802262	Q8XCJ9	NP_288286.1	Z2901	purT	CY	phosphoribosylglycinamide formyltransferase 2 [Escherichia coli O157:H7 EDL933]	598 / 580 / 671 / 390	42335.9	809.952	0	0	339.415	0	814.484	0	0	0	339.287	0	169.961	206.092	Cytoplasmic Membrane	Cytoplasm	392	Unknown	Cytoplasmic	Cytoplasmic	Cytoplasmic	Cytoplasmic	-	-	Purines, pyrimidines, nucleosides, and nucleotides	Purine ribonucleotide biosynthesis
161367617	Q8X8E3	NP_287251.2	Z1758	lolD	IM, Ht-4	lipoprotein transporter ATP-binding subunit [Escherichia coli O157:H7 EDL933]	599 / - / 1007 / 348	25481.4	0	0	0	1092.93	0	1175.38	0	0	0	190.451	0	0	204.896	Cytoplasmic Membrane	Inner membrane	233	Inner Membrane	Cytoplasmic	Cytoplasmic	Cytoplasmic	Cytoplasmic	-	-	Transport and binding proteins	Unknown substrate
157267365	Q8X648	NP_288726.2	Z3398	cdd	CY, Ho-2	cytidine deaminase [Escherichia coli O157:H7 EDL933]	600 / 834 / 673 / 193	31539.54*	0	0	259.262	0	0	0	0	0	596.184	712.876	0	876.702	203.752	Unknown	Cytoplasm	294	Unknown	X	Cytoplasmic	Periplasmic	Periplasmic	-	-	Purines, pyrimidines, nucleosides, and nucleotides	Salvage of nucleosides and nucleotides
15803058	P0AGL0	NP_289088.1	Z3798	iscR	CY	DNA-binding transcriptional regulator IscR [Escherichia coli O157:H7 EDL933]	601 / 520 / 468 / 859	17335.9	0	0	0	0	0	696.916	0	0	0	1746.41	0	0	203.611	Unknown	Cytoplasm	162	Cytoplasmic	Periplasmic	Cytoplasmic	Periplasmic	Cytoplasmic	-	-	Unknown function	General
15804365	P58256	NP_290405.1	Z5285	ilvC	CY, Ho-4	ketol-acid reductoisomerase [Escherichia coli O157:H7 EDL933]	602 / 478 / 1249 / -	54061.9	502.351	0	0	0	0	432.757	703.568	0	0	0	777.922	0	201.383	Cytoplasmic	Cytoplasm	491	Cytoplasmic	Cytoplasmic	Cytoplasmic	Cytoplasmic	Cytoplasmic	-	-	Amino acid biosynthesis	Pyruvate family
15799840	P0ACC5	NP_285852.1	Z0167	erpA (yadR)	CY, Ho-2	iron-sulfur cluster insertion protein ErpA [Escherichia coli O157:H7 EDL933]	603 / 168 / 185 / 976	12100	1317.81	0	0	0	0	1098.43	0	0	0	0	0	0	201.353	Unknown	Extracellular	114	Unknown	Periplasmic	Extracellular	Periplasmic	Cytoplasmic	-	-	Unknown function	General
15804014	Q8X5T2	NP_290050.1	Z4876	_	CY	putative phosphotransferase system enzyme subunit [Escherichia coli O157:H7 EDL933]	604 / 605 / 618 / 179	9813.07	0	0	0	0	0	0	0	0	0	0	0	2401.93	200.161	Cytoplasmic	Cytoplasm	93	Cytoplasmic	Cytoplasmic	Cytoplasmic	Extracellular	Cytoplasmic	-	-	Transport and binding proteins	Carbohydrates, organic alcohols, and acids
15803937	Q8X6Y1	NP_289973.1	Z4790	glgP	CY, Ho-2	glycogen phosphorylase [Escherichia coli O157:H7 EDL933]	605 / - / - / 376	93185.2	317.748	304.979	0	703.769	0	0	125.938	0	256.05	0	628.213	0	194.725	Cytoplasmic	Cytoplasm	815	Cytoplasmic	Cytoplasmic	Cytoplasmic	Cytoplasmic	Cytoplasmic	-	-	Energy metabolism	Biosynthesis and degradation of polysaccharides
15800187	P0AAS1	NP_286199.1	Z0570	ylaC	IM	hypothetical protein Z0570 [Escherichia coli O157:H7 EDL933]	606 / - / - / -	19820.3	1243.81	0	0	862.767	0	223.126	0	0	0	0	0	0	194.142	Cytoplasmic Membrane	Inner membrane	156	Inner Membrane	Cytoplasmic	Cytoplasmic	Cytoplasmic	Inner Membrane	-	-	Hypothetical proteins	Conserved
15802358	Q7DBI0	NP_288384.1	Z3013	fliC	Ex/OM, Ht-Mu	flagellin [Escherichia coli O157:H7 EDL933]	607 / 328 / 1036 / -	59956.55*	0	751.262	329.662	0	0	0	273.318	101.267	0	140.329	0	720.983	193.068	Extracellular	Flagellar	585	periplasm	X	Extracellular	Extracellular	Extracellular	-	-	Cell envelope	Surface structures
15800634	Q8X6K5	NP_286648.1	Z1110	ybjD	CY	uncharacterized protein YbjD [Escherichia coli O157:H7 EDL933]	608 / - / - / 1024	63535.7	250.742	576.327	0	0	0	430.835	174.815	701.421	0	180.232	0	0	192.864	Cytoplasmic	Cytoplasm	552	Cytoplasmic	Cytoplasmic	Cytoplasmic	Cytoplasmic	Cytoplasmic	-	-	Hypothetical proteins	Conserved
15800590	Q8X6U4	NP_286604.1	Z1064	yliJ	CY	putative transferase [Escherichia coli O157:H7 EDL933]	609 / 262 / 364 / 722	23930.5	1804.54	0	0	0	0	504.097	0	0	0	0	0	0	192.386	Cytoplasmic	Cytoplasm	210	Cytoplasmic	Cytoplasmic	Cytoplasmic	Cytoplasmic	Cytoplasmic	-	-	Unknown function	General
15803096	P60787	NP_289127.1	Z3851	lepA	CY	GTP-binding protein LepA [Escherichia coli O157:H7 EDL933]	610 / 646 / 1142 / 222	66567.8	806.669	0	0	0	0	230.431	0	0	674.112	579.714	0	0	190.91	Cytoplasmic Membrane	Cytoplasm	599	Cytoplasmic	Cytoplasmic	Cytoplasmic	Cytoplasmic	Cytoplasmic	-	-	Unknown function	General
161367620	P58626	NP_287221.2	Z1726	yceF	CY	Maf-like protein [Escherichia coli O157:H7 EDL933]	611 / 823 / 628 / 1154	21671	0	0	0	0	0	0	0	0	1027.36	0	1262.33	0	190.807	Cytoplasmic	Periplasm	194	Cytoplasmic	Cytoplasmic	Cytoplasmic	Cytoplasmic	Unknown	-	-	Cellular processes	Cell division
161367460	Q8XDR9	NP_290773.2	Z5745	fxsA	IM	protein that inhibits F exclusion of bacteriophage T7 [Escherichia coli O157:H7 EDL933]	612 / - / - / -	17677.3	0	0	0	0	0	0	0	0	0	0	2270.9	0	189.241	Cytoplasmic Membrane	Outer membrane	125	Inner Membrane	Cytoplasmic	Cytoplasmic	Cytoplasmic	Inner Membrane	-	-	Unknown function	General
15800415	Q8X9D0	NP_286427.1	Z0863	ybgK	CY	putative carboxylase [Escherichia coli O157:H7 EDL933]	613 / - / 616 / 417	34461.05*	0	0	0	209.434	0	0	0	0	0	1245.21	0	796.986	187.636	Cytoplasmic	Cytoplasm	310	Cytoplasmic	X	Cytoplasmic	Cytoplasmic	Unknown	-	-	Unknown function	General
15800666	Q8XAG0	NP_286680.1	Z1145	ureC	CY, Ht-9	urease subunit alpha [Escherichia coli O157:H7 EDL933]	614 / 796 / - / 831	60623.5	574.037	0	0	0	0	0	1200.16	0	0	0	0	468.019	186.852	Cytoplasmic	Cytoplasm	568	Cytoplasmic	Cytoplasmic	Cytoplasmic	Cytoplasmic	Unknown	-	-	Central intermediary metabolism	Nitrogen metabolism
15804769	P63179	NP_290810.1	Z5787	yjfH	CY, Rib	23S rRNA (guanosine-2'-O-)-methyltransferase [Escherichia coli O157:H7 EDL933]	615 / 455 / 632 / 319	26555.6	0	0	0	0	0	0	0	0	1002.56	0	1232.35	0	186.243	Cytoplasmic	Cytoplasm	243	Cytoplasmic	Cytoplasmic	Cytoplasmic	Cytoplasmic	Cytoplasmic	-	-	Protein synthesis	tRNA and rRNA base modification
161367610	Q8XB10	NP_287622.2	Z2171	marR	CY	DNA-binding transcriptional repressor MarR [Escherichia coli O157:H7 EDL933]	616 / 606 / 837 / 1279	16068.5	0	0	0	0	0	241.372	0	281.049	585.852	0	0	1110.86	184.928	Cytoplasmic	Cytoplasm	125	Cytoplasmic	Cytoplasmic	Cytoplasmic	Cytoplasmic	Cytoplasmic	-	-	Transport and binding proteins	Other
15800889	Q8X546	NP_286905.1	Z1383	_	IM (?)	unknown protein encoded by cryptic prophage CP-933M Z1383 [Escherichia coli O157:H7 EDL933]	617 / - / - / 1522	14596.31*	0	0	0	0	0	0	0	0	0	0	1067.18	1151.24	184.869	Unknown	Cytoplasm	129	Unknown	X	Cytoplasmic	Cytoplasmic	Cytoplasmic	-	-	Hypothetical proteins	Conserved
15800694	Q52355	NP_286708.1	Z1173	terB	CY	putative phage inhibition, colicin resistance and tellurite resistance protein [Escherichia coli O157:H7 EDL933]	618 / 794 / 192 / 1113	16687.4	807.371	0	437.862	0	0	0	0	968.262	0	0	0	0	184.458	Cytoplasmic	Cytoplasm	151	Unknown	Cytoplasmic	Cytoplasmic	Cytoplasmic	Cytoplasmic	-	-	Cellular processes	Adaptations to atypical conditions
15799858	P0AEH2	NP_285870.1	Z0187	yaeL (rseP)	IM	Regulator of sigma E protease [Escherichia coli O157:H7 EDL933]	619 / - / - / -	49069.5	0	683.845	496.423	203.844	0	255.661	0	557.605	0	0	0	0	183.115	Cytoplasmic Membrane	Extracellular	450	Extracellular	Cytoplasmic	Cytoplasmic	Cytoplasmic	Inner Membrane	-	-	Protein fate	Degradation of proteins, peptides, and glycopeptides
15804030	P0AED2	NP_290066.1	Z4895	uspA	CY	universal stress protein; broad regulatory function? [Escherichia coli O157:H7 EDL933]	620 / 87 / 10 / 81	16065.8	0	0	0	0	0	0	0	0	0	0	0	2177.89	181.491	Cytoplasmic	Cytoplasm	144	Cytoplasmic	Cytoplasmic	Cytoplasmic	Cytoplasmic	Cytoplasmic	-	-	Cellular processes	Adaptations to atypical conditions
15804706	Q8XEJ3	NP_290747.1	Z5716	yjdB	IM, Ht-Mu, divisome	putative cell division protein YjdB [Escherichia coli O157:H7 EDL933]	621 / - / - / 1424	62800.2	0	1499.86	299.141	0	0	0	0	362.741	0	0	0	0	180.146	Cytoplasmic Membrane	Inner membrane	557	Inner Membrane	Cytoplasmic	Cytoplasmic	Cytoplasmic	Inner Membrane	-	-	Unknown function	General
15802877	Q8XCQ3	NP_288904.1	Z3593	yfcB	CY	N5-glutamine S-adenosyl-L-methionine-dependent methyltransferase [Escherichia coli O157:H7 EDL933]	622 / 727 / - / 251	47668.2*	0	0	0	254.887	0	0	246.532	0	573.945	662.016	0	420.785	179.847	Cytoplasmic	Cytoplasm	421	Cytoplasmic	X	Cytoplasmic	Cytoplasmic	Cytoplasmic	-	-	DNA metabolism	DNA replication, recombination, and repair
15803610	Q8XAN4	NP_289643.1	Z4421	ygjF	CY	G/U mismatch-specific DNA glycosylase [Escherichia coli O157:H7 EDL933]	623 / 669 / 666 / 165	18653.7	0	0	0	2142.94	0	0	0	0	0	0	0	0	178.578	Cytoplasmic	Cytoplasm	168	Cytoplasmic	Cytoplasmic	Cytoplasmic	Cytoplasmic	Cytoplasmic	-	-	Unknown function	General
15800977	Q8XAX7	NP_286993.1	Z1483	_		putative tail fiber protein of bacteriophage BP-933W [Escherichia coli O157:H7 EDL933]	624 / - / 1208 / 1827	63952.5	0	673.187	93.8946	0	0	0	0	0	0	209.87	225.301	939.336	178.466	Unknown/Multiple Localization	Cytoplasm	645	Extracellular	Periplasmic	Periplasmic	Extracellular	Extracellular	-	-	Mobile and extrachromosomal element functions	Prophage functions
15800826	Q8XD85	NP_286842.1	Z1319	_	CY	putative oxidoreductase [Escherichia coli O157:H7 EDL933]	625 / 1063 / 1117 / -	41052.4	0	0	0	103.412	0	0	0	0	0	1037.8	0	996.454	178.139	Cytoplasmic	Cytoplasm	396	Cytoplasmic	Cytoplasmic	Cytoplasmic	Cytoplasmic	Cytoplasmic	-	-	Hypothetical proteins	Conserved
15800779	Q8XDG6	NP_286793.1	Z1264	kdsB	CY, Ho-3	3-deoxy-manno-octulosonate cytidylyltransferase [Escherichia coli O157:H7 EDL933]	626 / 236 / 639 / -	27608.4	0	0	0	0	0	0	0	0	1570.82	0	0	551.114	176.827	Cytoplasmic	Cytoplasm	248	Cytoplasmic	Cytoplasmic	Cytoplasmic	Cytoplasmic	Cytoplasmic	-	-	Cell envelope	Biosynthesis and degradation of surface polysaccharides and lipopolysaccharides
15802200	Q8XDT6	NP_288222.1	Z2826	yeaJ	IM	predicted diguanylate cyclase [Escherichia coli O157:H7 EDL933]	627 / - / - / -	56551.5	324.152	247.501	0	223.903	0	0	0	0	818.056	0	502.78	0	176.366	Cytoplasmic	Inner membrane	496	Inner Membrane	Cytoplasmic	Cytoplasmic	Cytoplasmic	Outer Membrane	-	-	Unknown function	General
15800781	P0AB02	NP_286795.1	Z1267	ycbC	IM	hypothetical protein Z1267 [Escherichia coli O157:H7 EDL933]	628 / - / - / -	28665.3	0	0	0	436.454	0	0	174.896	591.507	0	911.935	0	0	176.233	Cytoplasmic Membrane	Inner membrane	259	Unknown	Periplasmic	Cytoplasmic	Periplasmic	Inner Membrane	-	-	Unclassified	Role category not yet assigned
15799771	P64258	NP_285783.1	Z0097	mraY	IM	phospho-N-acetylmuramoyl-pentapeptide-transferase [Escherichia coli O157:H7 EDL933]	629 / - / - / -	39901.5	0	0	0	0	0	647.952	0	1464.6	0	0	0	0	176.046	Cytoplasmic Membrane	Inner membrane	360	Inner Membrane	Cytoplasmic	Cytoplasmic	Cytoplasmic	Inner Membrane	-	-	Cell envelope	Biosynthesis and degradation of murein sacculus and peptidoglycan
15802099	Q8X5Y8	NP_288121.1	Z2715	ydiJ	CY	conserved FAD-linked oxidoreductase [Escherichia coli O157:H7 EDL933]	630 / - / 1419 / 557	113289	258.941	98.7157	219.524	176.796	0	674.866	0	611.879	0	71.4369	0	0	176.013	Cytoplasmic	Cytoplasm	1018	Unknown	Cytoplasmic	Cytoplasmic	Cytoplasmic	Cytoplasmic	-	-	Energy metabolism	Electron transport
15804571	P0AG98	NP_290612.1	Z5554	secE	IM, Ht-9	preprotein translocase subunit SecE [Escherichia coli O157:H7 EDL933]	631 / - / - / -	13642.9	577.235	0	0	0	0	1516.66	0	0	0	0	0	0	174.491	Cytoplasmic Membrane	Inner membrane	127	Inner Membrane	Cytoplasmic	Cytoplasmic	Cytoplasmic	Inner Membrane	-	-	Protein fate	Protein and peptide secretion and trafficking
15804524	Q8X789	NP_290564.1	Z5480	ftsN	IM	essential cell division protein [Escherichia coli O157:H7 EDL933]	632 / 1051 / 826 / -	35835.8	0	277.537	622.136	363.765	0	0	124.796	702.983	0	0	0	0	174.268	Cytoplasmic Membrane	Cytoplasm	319	Inner Membrane	Periplasmic	Cytoplasmic	Extracellular	Periplasmic	-	-	Cellular processes	Cell division
15804456	P0A3B3	NP_290496.1	Z5407	yihK	CY, Rib	GTP-binding protein [Escherichia coli O157:H7 EDL933]	633 / 231 / 540 / 92	67352.9	0	0	0	0	0	0	0	0	1877.36	204.567	0	0	173.494	Cytoplasmic Membrane	Cytoplasm	607	Cytoplasmic	Cytoplasmic	Cytoplasmic	Cytoplasmic	Cytoplasmic	-	-	Unknown function	General
15803198	Q8X912	NP_289230.1	Z3980	proW	IM, Ht-5	glycine betaine transporter membrane protein [Escherichia coli O157:H7 EDL933]	634 / - / - / -	37588.3	0	0	0	2077.98	0	0	0	0	0	0	0	0	173.165	Cytoplasmic Membrane	Inner membrane	354	Inner Membrane	Cytoplasmic	Cytoplasmic	Cytoplasmic	Inner Membrane	-	-	Transport and binding proteins	Amino acids, peptides and amines
15801396	P0A736	NP_287413.1	Z1936	minE	CY/IM, Ht-Mu, divisome	cell division topological specificity factor MinE [Escherichia coli O157:H7 EDL933]	635 / 512 / 137 / 162	10234.6	376.15	0	0	0	0	0	1095.75	0	0	593.89	0	0	172.149	Cytoplasmic	Inner membrane	88	Cytoplasmic	Cytoplasmic	Cytoplasmic	Cytoplasmic	Cytoplasmic	-	-	Cellular processes	Cell division
15802921	Q8XBR3	NP_288949.1	Z3644	yfdZ	CY	aminotransferase [Escherichia coli O157:H7 EDL933]	636 / 716 / - / 1382	46171.3	0	0	0	0	0	0	0	0	385.896	444.184	954.838	280.685	172.134	Cytoplasmic	Cytoplasm	412	Cytoplasmic	Cytoplasmic	Cytoplasmic	Cytoplasmic	Cytoplasmic	-	-	Amino acid biosynthesis	Aspartate family
15804132	P0A822	NP_290171.1	Z5012	selA	CY	selenocysteine synthase [Escherichia coli O157:H7 EDL933]	637 / 1040 / - / 836	50605.2	0	970.185	0	173.518	0	206.394	391.849	0	303.571	0	0	0	170.46	Cytoplasmic	Cytoplasm	463	Cytoplasmic	Cytoplasmic	Cytoplasmic	Cytoplasmic	Cytoplasmic	-	-	Protein synthesis	tRNA aminoacylation
75994477	O82882	YP_325591.1	L7031	stcE	Ex	type II secretion-associated zinc metalloprotease StcE [Escherichia coli O157:H7 EDL933]	638 / 238 / 142 / 913	99544.6	0	0	0	0	0	0	123.269	0	452.937	74.929	1387.5	0	169.886	Extracellular	Extracellular	898	Extracellular	Extracellular	Extracellular	Periplasmic	Extracellular	Extracellular	-	No Data	No Data
15804379	Q8XAR6	NP_290419.1	Z5299	rfbB (rffG)	CY	dTDP-glucose 4,6-dehydratase [Escherichia coli O157:H7 EDL933]	639 / 837 / - / 780	39802.9*	0	0	0	323.665	0	0	0	0	0	987.342	726.797	0	169.817	Cytoplasmic	Cytoplasm	355	Unknown	X	Cytoplasmic	Cytoplasmic	Cytoplasmic	-	-	Cell envelope	Biosynthesis and degradation of surface polysaccharides and lipopolysaccharides
15804217	Q7DB80	NP_290256.1	Z5107	espA	Ex/OM	secreted protein EspA [Escherichia coli O157:H7 EDL933]	640 / 647 / 861 / 922	20573.2	0	0	0	0	0	642.717	0	1389	0	0	0	0	169.31	Unknown	Extracellular	192	Unknown	Extracellular	Extracellular	Periplasmic	Extracellular	-	-	Energy metabolism	Electron transport
15801166	P62518	NP_287183.1	Z1684	mdoH	IM	glucosyltransferase MdoH [Escherichia coli O157:H7 EDL933]	641 / - / - / 1803	96971.26*	197.436	304.792	0	136.376	0	515.242	0	184.824	0	285.804	306.113	95.2595	168.821	Cytoplasmic Membrane	Inner membrane	847	Inner Membrane	X	Cytoplasmic	Cytoplasmic	Inner Membrane	-	-	Cellular processes	Other
161367640	Q8XE89	NP_286153.2	Z0513	yajI	L (IM or OM)	Putative uncharacterized protein YajI [Escherichia coli O157:H7 EDL933]	642 / - / - / -	19601.7	0	714.928	0	0	0	0	0	0	0	560.454	0	747.893	168.606	Unknown	Inner membrane	199	periplasm	Periplasmic	Periplasmic	Periplasmic	Outer Membrane	-	-	Unknown function	General
15800209	Q8XD35	NP_286221.1	Z0599	ushA	PP	bifunctional UDP-sugar hydrolase/5'-nucleotidase periplasmic precursor [Escherichia coli O157:H7 EDL933]	643 / 241 / 897 / 1746	60728.5	280.621	0	0	0	0	0	620.909	0	659.205	0	453.972	0	167.892	Periplasmic	Periplasm	550	periplasm	Periplasmic	Periplasmic	Periplasmic	Outer Membrane	-	-	Purines, pyrimidines, nucleosides, and nucleotides	Sugar-nucleotide biosynthesis and conversions
15800661	Q8XAG5	NP_286675.1	Z1140	_	IM	putative inner membrane protein Z1140 [Escherichia coli O157:H7 EDL933]	644 / - / - / 1759	61973.3	0	1077.14	0	0	0	302.812	0	241.699	0	334.61	0	0	163.022	Cytoplasmic Membrane	Inner membrane	539	Inner Membrane	Cytoplasmic	Cytoplasmic	Cytoplasmic	Inner Membrane	-	-	Unknown function	General
15804756	Q8XDN8	NP_290797.1	Z5774	yjeF	CY	predicted carbohydrate kinase YjeF [Escherichia coli O157:H7 EDL933]	645 / 550 / - / -	54526.75*	0	0	0	0	0	0	304.82	0	0	314.328	1331.16	0	162.526	Cytoplasmic	Cytoplasm	515	Unknown	X	Cytoplasmic	Cytoplasmic	Unknown	-	-	Energy metabolism	Sugars
15804991	Q8X5M0	NP_290110.1	Z4944m / Z4945	bcsC (yhjL)	Ex/OM	endo-1,4-D-glucanase subunit BcsC [Escherichia coli O157:H7 EDL933]	646 / 1055 / - / 1704	127477	0	0	0	0	233.995	943.319	0	765.783	0	0	0	0	161.925	Unknown/Multiple Localization	Outer membrane	1154	Unknown	Periplasmic	Periplasmic	Periplasmic	Extracellular	-	-	No Data	No Data
15803496	Q8XCU2	NP_289529.1	Z4302	ansB	PP	L-asparaginase II [Escherichia coli O157:H7 EDL933]	647 / 351 / 19 / 398	36849.1	0	0	0	0	0	0	589.916	0	0	304.097	653.634	386.537	161.182	Periplasmic	Cytoplasm	348	periplasm	Periplasmic	Periplasmic	Periplasmic	Periplasmic	-	-	Energy metabolism	Amino acids and amines
15804507	Q8X7A5	NP_290547.1	Z5463	cdh	IM	CDP-diacylglycerol pyrophosphatase [Escherichia coli O157:H7 EDL933]	648 / - / - / -	28399.35*	0	0	419.81	0	0	0	1050.48	426.647	0	0	0	0	158.078	Cytoplasmic Membrane	Inner membrane	251	Inner Membrane	X	Cytoplasmic	Cytoplasmic	Inner Membrane	-	-	Fatty acid and phospholipid metabolism	Biosynthesis
15804470	Q8X8D2	NP_290510.1	Z5422	yihW	CY	putative DEOR-type transcriptional activator [Escherichia coli O157:H7 EDL933]	649 / 940 / - / -	29494.15*	1662.78	0	0	0	0	0	0	233.979	0	0	0	0	158.063	Cytoplasmic	Cytoplasm	269	Cytoplasmic	X	Cytoplasmic	Cytoplasmic	Cytoplasmic	-	-	Energy metabolism	Anaerobic
15804792	P0A7R3	NP_290833.1	Z5812	rplI	CY, 50S Rib	50S ribosomal protein L9 [Escherichia coli O157:H7 EDL933]	650 / 725 / 17 / 124	15768.4	0	0	0	0	0	439.26	0	1439.65	0	0	0	0	156.576	Cytoplasmic	Cytoplasm	149	Cytoplasmic	Cytoplasmic	Cytoplasmic	Cytoplasmic	Cytoplasmic	-	-	Protein synthesis	Ribosomal proteins: synthesis and modification
15799983	Q8X6K0	NP_285995.1	Z0344	_	IM	putative membrane protein Z0344 [Escherichia coli O157:H7 EDL933]	651 / - / - / -	9984.49	0	0	0	0	0	0	0	0	0	0	1841.34	0	153.445	Unknown	Inner membrane	92	Unknown	Cytoplasmic	Cytoplasmic	Cytoplasmic	Cytoplasmic	-	-	Hypothetical proteins	Conserved
15803186	Q8X934	NP_289218.1	Z3967	ygaP	IM	predicted inner membrane protein with hydrolase activity [Escherichia coli O157:H7 EDL933]	652 / - / - / -	18429.8	0	0	0	0	0	0	545.379	0	0	534.357	0	751.338	152.589	Cytoplasmic Membrane	Inner membrane	172	Unknown	Cytoplasmic	Cytoplasmic	Cytoplasmic	Inner Membrane	-	-	Hypothetical proteins	Conserved
15803889	P0AG09	NP_289925.1	Z4739	rpe	CY	ribulose-phosphate 3-epimerase [Escherichia coli O157:H7 EDL933]	653 / 135 / 1055 / 1540	24553.3	0	0	0	0	0	0	1823.92	0	0	0	0	0	151.994	Cytoplasmic	Cytoplasm	225	Cytoplasmic	Cytoplasmic	Cytoplasmic	Cytoplasmic	Unknown	-	-	Energy metabolism	Pentose phosphate pathway
15803859	Q8X882	NP_289893.1	Z4704	yheO	CY	predicted DNA-binding transcriptional regulator YheO [Escherichia coli O157:H7 EDL933]	654 / 939 / - / 632	27406.3	0	0	0	0	0	1487.39	0	329.476	0	0	0	0	151.406	Cytoplasmic	Cytoplasm	244	Cytoplasmic	Cytoplasmic	Cytoplasmic	Cytoplasmic	Cytoplasmic	-	-	Hypothetical proteins	Conserved
15803646	P67661	NP_289679.1	Z4459	yhaJ	CY	putative transcriptional regulator LYSR-type [Escherichia coli O157:H7 EDL933]	655 / 913 / 1450 / 1637	33274.79*	0	0	0	221.634	0	0	0	0	417.611	534.362	0	630.849	150.371	Cytoplasmic	Cytoplasm	298	Cytoplasmic	X	Cytoplasmic	Cytoplasmic	Cytoplasmic	-	-	Regulatory functions	Other
15800649	Q8XAI3	NP_286663.1	Z1128	_	CY	hypothetical protein Z1128 [Escherichia coli O157:H7 EDL933]	656 / - / 896 / 1560	22433.8	0	0	0	0	1796.68	0	0	0	0	0	0	0	149.723	Cytoplasmic	Cytoplasm	187	Unknown	Cytoplasmic	Cytoplasmic	Cytoplasmic	Cytoplasmic	-	-	Hypothetical proteins	Conserved
15804293	P0AES7	NP_290332.1	Z5190	gyrB	CY, Ht-4	DNA gyrase subunit B [Escherichia coli O157:H7 EDL933]	657 / 1162 / 1235 / 196	89955.93*	490.62	0	0	225.901	0	0	0	0	832.956	235.363	0	0	148.737	Cytoplasmic	Cytoplasm	804	Unknown	X	Cytoplasmic	Cytoplasmic	Cytoplasmic	-	-	DNA metabolism	DNA replication, recombination, and repair
15804854	Q8XCA4	NP_290895.1	Z5874	lptG (yjgQ)	IM, Ht-6	lipopolysaccharide ABC transporter permease protein [Escherichia coli O157:H7 EDL933]	658 / - / - / -	39748.4	0	0	0	302.624	0	391.161	0	429.317	0	661.288	0	0	148.699	Cytoplasmic Membrane	Inner membrane	361	Inner Membrane	Periplasmic	Cytoplasmic	Extracellular	Inner Membrane	-	-	Unclassified	Role category not yet assigned
15801032	Q8XAN7	NP_287048.1	Z1544	acpS2	CY, Ho-2	putative acyl-carrier protein synthase [Escherichia coli O157:H7 EDL933]	659 / - / - / 964	13684.2	0	0	0	0	955.332	245.029	0	0	0	0	0	557.29	146.471	Unknown	Cytoplasm	122	Cytoplasmic	Cytoplasmic	Cytoplasmic	Cytoplasmic	Cytoplasmic	-	-	Fatty acid and phospholipid metabolism	Biosynthesis
161367553	Q8XBD2	NP_289032.2	Z3738	gcvR	CY	glycine cleavage system transcriptional repressor [Escherichia coli O157:H7 EDL933]	660 / 648 / 805 / 771	20767.8	0	0	0	0	0	0	0	0	0	1745.13	0	0	145.428	Cytoplasmic	Cytoplasm	212	Cytoplasmic	Cytoplasmic	Cytoplasmic	Cytoplasmic	Unknown	-	-	Central intermediary metabolism	Other
161367591	Q8XCI5	NP_288306.2	Z2922	yecN	IM	predicted inner membrane protein YecN [Escherichia coli O157:H7 EDL933]	661 / - / 575 / 1123	15225.8	0	0	0	0	0	1742.29	0	0	0	0	0	0	145.191	Cytoplasmic Membrane	Inner membrane	141	Unknown	Cytoplasmic	Cytoplasmic	Cytoplasmic	Inner Membrane	-	-	Hypothetical proteins	Conserved
15802543	Q8X7L8	NP_288569.1	Z3229	yegH	IM	putative transport protein [Escherichia coli O157:H7 EDL933]	662 / - / - / 1589	62066.01*	0	0	0	273.715	0	0	0	1159.47	0	294.563	0	0	143.979	Cytoplasmic Membrane	Inner membrane	549	Inner Membrane	X	Cytoplasmic	Cytoplasmic	Inner Membrane	-	-	Energy metabolism	Electron transport
15800194	Q8XD54	NP_286206.1	Z0581	aefA	IM	potassium efflux protein KefA [Escherichia coli O157:H7 EDL933]	663 / 1181 / - / 1613	127214	130.598	323.608	353.584	387.478	0	0	0	120.831	103.451	202.137	0	91.9919	142.806	Cytoplasmic Membrane	Outer membrane	1120	Inner Membrane	Cytoplasmic	Cytoplasmic	Cytoplasmic	Inner Membrane	-	-	Unknown function	General
15802052	Q8X647	NP_288074.1	Z2652	pdxH	CY, Ho-2	pyridoxamine 5'-phosphate oxidase [Escherichia coli O157:H7 EDL933]	664 / 970 / 996 / -	25560.2	0	0	0	0	0	345.579	0	377.097	0	0	619.166	369.492	142.611	Cytoplasmic	Cytoplasm	218	Unknown	Cytoplasmic	Cytoplasmic	Cytoplasmic	Cytoplasmic	-	-	Biosynthesis of cofactors, prosthetic groups, and carriers	Pyridoxine
15803140	P0A834	NP_289172.1	Z3913	smpB	CY, Rib	SsrA-binding protein [Escherichia coli O157:H7 EDL933]	665 / - / 986 / 304	18274.12*	0	0	0	0	0	0	0	0	0	1694.22	0	0	141.185	Unknown	Cytoplasm	160	Cytoplasmic	X	Cytoplasmic	Periplasmic	Cytoplasmic	-	-	Protein synthesis	Other
161367641	Q8XEA0	NP_286133.2	Z0493	yajF	CY	putative NAGC-like transcriptional regulator [Escherichia coli O157:H7 EDL933]	666 / - / - / -	32508.5	0	0	0	1537.36	0	0	0	0	0	155.411	0	0	141.064	Cytoplasmic	Cytoplasm	348	Cytoplasmic	Cytoplasmic	Cytoplasmic	Cytoplasmic	Cytoplasmic	-	-	Unknown function	General
15803839	P0A7M8	NP_289873.1	Z4683	rpmC	CY, 50S Rib	50S ribosomal protein L29 [Escherichia coli O157:H7 EDL933]	667 / - / 44 / 157	7273.21	0	0	0	0	0	1689.34	0	0	0	0	0	0	140.779	Cytoplasmic	Cytoplasm	63	Unknown	Cytoplasmic	Cytoplasmic	Cytoplasmic	Cytoplasmic	-	-	Protein synthesis	Ribosomal proteins: synthesis and modification
15799682	Q8XA84	NP_285694.1	Z0002	thrA	CY, Ho-4	bifunctional aspartokinase I/homeserine dehydrogenase I [Escherichia coli O157:H7 EDL933]	668 / 1093 / - / 185	89075.7	313.02	118.556	262.302	185.326	0	269.386	218.324	0	0	112.836	0	202.593	140.195	Cytoplasmic	Cytoplasm	820	Cytoplasmic	Cytoplasmic	Cytoplasmic	Cytoplasmic	Cytoplasmic	-	-	Amino acid biosynthesis	Aspartate family
15804879	Q8XC72	NP_290920.1	Z5900	_		hypothetical protein Z5900 [Escherichia coli O157:H7 EDL933]	669 / 790 / 1334 / 1092	189051.57*	491.24	0	0	111.851	0	0	286.096	0	0	117.63	633.168	38.8309	139.901	Unknown/Multiple Localization	Cytoplasm	1644	Unknown	X	Cytoplasmic	Cytoplasmic	Outer Membrane	-	-	Unclassified	Role category not yet assigned
15800783	Q8XDG2	NP_286797.1	Z1269	mukF	CY, Ht-8, divisome	condesin subunit F [Escherichia coli O157:H7 EDL933]	670 / - / - / 1367	50527.4*	206.741	0	0	285.489	0	537.36	0	0	0	447.064	0	182.576	138.269	Cytoplasmic	Nucleoid	440	Cytoplasmic	X	Cytoplasmic	Cytoplasmic	Cytoplasmic	-	-	Cellular processes	Toxin production and resistance
15800062	Q8X693	NP_286074.1	Z0429	prpD	CY, Ho-1	2-methylcitrate dehydratase [Escherichia coli O157:H7 EDL933]	671 / 981 / 1076 / 1777	53949.6	0	0	0	0	0	0	0	0	0	221.913	1434.69	0	138.051	Cytoplasmic	Cytoplasm	483	Unknown	Cytoplasmic	Cytoplasmic	Cytoplasmic	Cytoplasmic	-	-	Unknown function	General
15801415	Q8XDJ7	NP_287432.1	Z1956	mltE	L-OM	murein transglycosylase E [Escherichia coli O157:H7 EDL933]	672 / - / - / -	26545.5	349.172	0	0	0	0	847.583	0	457.428	0	0	0	0	137.849	Unknown	Periplasm	203	Unknown	Periplasmic	Cytoplasmic	Periplasmic	Unknown	-	-	Cell envelope	Biosynthesis and degradation of murein sacculus and peptidoglycan
15800957	Q8X533	NP_286973.1	Z1458	(ninG)		unknown protein encoded by bacteriophage BP-933W [Escherichia coli O157:H7 EDL933]	673 / - / - / -	23789.4	533.22	0	0	0	0	0	0	0	0	1117.74	0	0	137.58	Cytoplasmic	Cytoplasm	201	Unknown	Periplasmic	Cytoplasmic	Extracellular	Unknown	-	-	Mobile and extrachromosomal element functions	Prophage functions
15802293	Q8XCG0	NP_288318.1	Z2935	cheZ	CY, Ho-Mu	chemotaxis regulator CheZ [Escherichia coli O157:H7 EDL933]	674 / 608 / - / 428	23975.1	0	0	548.436	0	0	0	0	0	0	0	1101.57	0	137.501	Cytoplasmic	Cytoplasm	214	Cytoplasmic	Cytoplasmic	Cytoplasmic	Cytoplasmic	Cytoplasmic	-	-	Cellular processes	Chemotaxis and motility
15803550	P0ABU8	NP_289583.1	Z4359	exbB	IM, Ht-3	biopolymer transport protein ExbB [Escherichia coli O157:H7 EDL933]	675 / 985 / - / -	26286.4	0	734.517	0	0	0	0	0	908.042	0	0	0	0	136.88	Cytoplasmic Membrane	Inner membrane	244	Inner Membrane	Cytoplasmic	Cytoplasmic	Cytoplasmic	Inner Membrane	-	-	Transport and binding proteins	Cations and iron carrying compounds
15804058	Q8X3J5	NP_290094.1	Z4927	mdtF (yhiV)	IM, Ht-9	multidrug transporter protein MdtF [Escherichia coli O157:H7 EDL933]	676 / - / - / -	111562.57*	500.836	0	0	0	0	432.796	0	705.546	0	0	0	0	136.598	Cytoplasmic Membrane	Inner membrane	1037	Inner Membrane	X	Cytoplasmic	Cytoplasmic	Inner Membrane	-	-	Energy metabolism	Electron transport
15804405	P0ABI6	NP_290445.1	Z5333	corA	IM	magnesium/nickel/cobalt transporter CorA [Escherichia coli O157:H7 EDL933]	677 / - / - / 1061	36588.3	0	0	0	484.319	0	0	0	0	0	507.093	0	643.913	136.277	Cytoplasmic Membrane	Inner membrane	316	Inner Membrane	Cytoplasmic	Cytoplasmic	Cytoplasmic	Inner Membrane	-	-	Transport and binding proteins	Cations and iron carrying compounds
15802888	Q8XCN9	NP_288915.1	Z3605	fadI	CY, Ht-Mu	3-ketoacyl-CoA thiolase [Escherichia coli O157:H7 EDL933]	678 / - / 823 / 588	46512.6	0	680.167	0	378.94	0	288.285	0	284.555	0	0	0	0	135.996	Cytoplasmic	Cytoplasm	436	Cytoplasmic	Cytoplasmic	Cytoplasmic	Cytoplasmic	Cytoplasmic	-	-	Energy metabolism	ATP-proton motive force interconversion
15802233	Q8XCP5	NP_288256.1	Z2863	(yobD)	IM	membrane protein YobD [Escherichia coli O157:H7 EDL933]	679 / - / - / 1683	17642.7	0	0	0	0	0	841.851	0	778.407	0	0	0	0	135.021	Cytoplasmic Membrane	Inner membrane	152	Inner Membrane	Cytoplasmic	Cytoplasmic	Cytoplasmic	Inner Membrane	-	-	Hypothetical proteins	Conserved
15799767	P0AEN6	NP_285779.1	Z0093	ftsL	IM, Ht-Mu, divisome	cell division protein FtsL [Escherichia coli O157:H7 EDL933]	680 / - / - / -	13626.4	0	0	0	717.129	0	901.416	0	0	0	0	0	0	134.879	Cytoplasmic	Inner membrane	121	Inner Membrane	Cytoplasmic	Cytoplasmic	Cytoplasmic	Inner Membrane	-	-	Cellular processes	Cell division
15803255	Q7DBA7	NP_289287.1	Z4046	yclC	CY	predicted 4-hydroxybenzoate decarboxylase [Escherichia coli O157:H7 EDL933]	681 / 890 / - / 1486	52392.8	0	0	0	0	0	0	0	0	1605.49	0	0	0	133.791	Cytoplasmic	Cytoplasm	475	Unknown	Cytoplasmic	Cytoplasmic	Cytoplasmic	Cytoplasmic	-	-	Hypothetical proteins	Conserved
15803950	Q8X6V8	NP_289986.1	Z4806	gntR	CY	regulator of gluconate (gnt) operon [Escherichia coli O157:H7 EDL933]	682 / 959 / - / 828	35228.1	0	0	0	0	1446.26	0	0	159.078	0	0	0	0	133.778	Cytoplasmic	Cytoplasm	321	Cytoplasmic	Cytoplasmic	Cytoplasmic	Cytoplasmic	Cytoplasmic	-	-	Energy metabolism	Entner-Doudoroff
15803305	P0AG22	NP_289338.1	Z4099	relA	CY	GDP/GTP pyrophosphokinase [Escherichia coli O157:H7 EDL933]	683 / - / - / 333	83872.5	513.406	0	0	0	0	0	0	0	213.841	341.929	527.322	0	133.041	Cytoplasmic	Cytoplasm	744	Cytoplasmic	Cytoplasmic	Cytoplasmic	Cytoplasmic	Cytoplasmic	-	-	Protein synthesis	tRNA aminoacylation
15802044	P58325	NP_288066.1	Z2639	rnfD	IM, Ht-Mu	electron transport complex protein RnfD [Escherichia coli O157:H7 EDL933]	684 / - / - / -	38108.7	0	1595.99	0	0	0	0	0	0	0	0	0	0	133	Cytoplasmic Membrane	Inner membrane	352	Inner Membrane	Cytoplasmic	Cytoplasmic	Cytoplasmic	Inner Membrane	-	-	Transport and binding proteins	Unknown substrate
15804164	Q8XDD5	NP_290203.1	Z5047	rfaF (waaF)	CY	ADP-heptose:LPS heptosyltransferase II [Escherichia coli O157:H7 EDL933]	685 / 812 / - / 1025	39025.7	0	0	0	0	0	1590.9	0	0	0	0	0	0	132.575	Unknown	Cytoplasm	348	Cytoplasmic	Cytoplasmic	Cytoplasmic	Cytoplasmic	Unknown	-	-	Cell envelope	Biosynthesis and degradation of surface polysaccharides and lipopolysaccharides
15803402	Q8X3L6	NP_289435.1	Z4203	ygeR	L (IM or OM)	putative lipoprotein [Escherichia coli O157:H7 EDL933]	686 / 1032 / 1068 / -	23480.38*	0	335.187	0	0	0	385.577	0	842.302	0	0	0	0	130.256	Unknown	Extracellular	223	Extracellular	X	Extracellular	Extracellular	Extracellular	-	-	Energy metabolism	Electron transport
15800785	Q8XDG0	NP_286799.1	Z1271	mukB	CY, Ht-8, divisome	cell division protein MukB [Escherichia coli O157:H7 EDL933]	687 / 1178 / 1477 / 641	170185.13*	154.563	118.694	0	266.688	0	401.377	0	509.431	0	80.01	0	0	127.564	Cytoplasmic	Nucleoid	1486	Cytoplasmic	X	Cytoplasmic	Cytoplasmic	Cytoplasmic	-	-	Unclassified	Role category not yet assigned
15803190	P0ADQ9	NP_289222.1	Z3972	ygaM	IM	predicted protein YgaM [Escherichia coli O157:H7 EDL933]	688 / - / - / -	12287.2	0	0	0	0	0	1522.94	0	0	0	0	0	0	126.912	Unknown	Cytoplasm	113	Unknown	Periplasmic	Cytoplasmic	Periplasmic	Cytoplasmic	-	-	Hypothetical proteins	Conserved
15803555	Q8XBT7	NP_289588.1	Z4364	yqhD	CY, Ho-2	putative oxidoreductase [Escherichia coli O157:H7 EDL933]	689 / 177 / 217 / 591	42081.4	0	0	0	0	0	0	0	0	0	1059.98	0	450.885	125.905	Cytoplasmic	Cytoplasm	387	Cytoplasmic	Cytoplasmic	Cytoplasmic	Cytoplasmic	Cytoplasmic	-	-	Central intermediary metabolism	Other
15802734	P0AFU1	NP_288761.1	Z3437	yejB	IM, Ht-5	putative transport system permease protein [Escherichia coli O157:H7 EDL933]	690 / - / - / -	40321.53*	0	0	0	430.259	0	0	0	401.288	0	0	675.106	0	125.554	Cytoplasmic Membrane	Inner membrane	364	Inner Membrane	X	Cytoplasmic	Cytoplasmic	Inner Membrane	-	-	Energy metabolism	Electron transport
15802070	P0AGD5	NP_288092.1	Z2678	sodB	CY, Ho-2	superoxide dismutase [Escherichia coli O157:H7 EDL933]	691 / 29 / 5 / 115	21264.9	0	0	0	0	0	0	0	0	0	0	1506.65	0	125.554	Periplasmic	Periplasm	193	Unknown	Cytoplasmic	Cytoplasmic	Extracellular	Cytoplasmic	-	-	Cellular processes	Detoxification
15804022	Q8X5S2	NP_290058.1	Z4885	yhiH	IM	putative ATP-binding component of a transport system [Escherichia coli O157:H7 EDL933]	692 / 1006 / - / 1198	99057.1	411.114	0	0	0	0	177.115	0	773.673	0	144.585	0	0	125.541	Cytoplasmic Membrane	Inner membrane	894	Inner Membrane	Cytoplasmic	Cytoplasmic	Cytoplasmic	Inner Membrane	-	-	Transport and binding proteins	Unknown substrate
15803563	P0AFI3	NP_289596.1	Z4373	parC	CY, Ho-2	DNA topoisomerase IV subunit A [Escherichia coli O157:H7 EDL933]	693 / 1174 / - / 1371	83828	154.437	0	0	0	0	0	0	0	0	140.23	1210.13	0	125.4	Cytoplasmic Membrane	Cytoplasm	752	Unknown	Cytoplasmic	Cytoplasmic	Cytoplasmic	Cytoplasmic	-	-	DNA metabolism	DNA replication, recombination, and repair
15801411	P0A6J7	NP_287428.1	Z1952	dadA	IM, Ht-2	D-amino acid dehydrogenase small subunit [Escherichia coli O157:H7 EDL933]	694 / 888 / 1217 / 66	47605.5	723.783	0	0	0	0	300.054	0	0	0	480.577	0	0	125.368	Cytoplasmic Membrane	Inner membrane	432	Inner Membrane	Cytoplasmic	Cytoplasmic	Cytoplasmic	Unknown	-	-	Energy metabolism	Amino acids and amines
161367540	Q8X4S5	NP_289257.2	Z4015	gutQ	CY, Ho-2	D-arabinose 5-phosphate isomerase [Escherichia coli O157:H7 EDL933]	695 / 491 / 1054 / 1347	34035.81*	0	0	0	0	0	0	0	0	908.892	0	586.52	0	124.618	Unknown	Cytoplasm	308	Cytoplasmic	X	Cytoplasmic	Cytoplasmic	Periplasmic	-	-	Unknown function	General
15800290	Q8XBX4	NP_286302.1	Z0716	ybdG	IM	inner membrane transport protein YbdG [Escherichia coli O157:H7 EDL933]	696 / - / - / -	46610.1	0	0	0	259.172	0	0	0	0	0	540.65	0	692.563	124.365	Cytoplasmic Membrane	Outer membrane	415	Inner Membrane	Cytoplasmic	Cytoplasmic	Cytoplasmic	Inner Membrane	-	-	Energy metabolism	Electron transport
161367567	Q7AC24	NP_288829.2	Z3511	arnB	CY, Ho-2	UDP-4-amino-4-deoxy-L-arabinose--oxoglutarate aminotransferase [Escherichia coli O157:H7 EDL933]	697 / 228 / 462 / 610	41696.96*	0	0	0	284.423	0	0	0	0	0	893.026	0	311.016	124.039	Cytoplasmic	Cytoplasm	379	Cytoplasmic	X	Cytoplasmic	Cytoplasmic	Cytoplasmic	-	-	Energy metabolism	Electron transport
15802176	P0ACY2	NP_288198.1	Z2798	ydjA	CY, Ho-2	putative nitroreductase [Escherichia coli O157:H7 EDL933]	698 / 229 / 167 / 490	20058.2	0	0	0	0	695.255	0	0	0	361.746	414.424	0	0	122.619	Unknown	Periplasm	183	Cytoplasmic	Cytoplasmic	Cytoplasmic	Cytoplasmic	Cytoplasmic	-	-	Unknown function	Enzymes of unknown specificity
15803461	P0A9B8	NP_289494.1	Z4266	epd	CY	erythrose 4-phosphate dehydrogenase [Escherichia coli O157:H7 EDL933]	699 / - / - / 799	37297.9	0	0	0	865.716	0	0	587.943	0	0	0	0	0	121.138	Cytoplasmic	Cytoplasm	339	Cytoplasmic	Cytoplasmic	Cytoplasmic	Cytoplasmic	Cytoplasmic	-	-	Biosynthesis of cofactors, prosthetic groups, and carriers	Pyridoxine
15804005	Q8X5U4	NP_290041.1	Z4867	actP	CY	holo-(acyl carrier protein) synthase 2 [Escherichia coli O157:H7 EDL933]	700 / - / 1231 / -	21736.9	0	0	0	0	0	0	0	0	0	1449.02	0	0	120.752	Unknown	Cytoplasm	195	Cytoplasmic	Cytoplasmic	Cytoplasmic	Cytoplasmic	Cytoplasmic	-	-	Protein fate	Protein modification and repair
15803976	Q8X6R2	NP_290012.1	Z4838	ftsY	CY/IM, Ht-3	cell division protein FtsY [Escherichia coli O157:H7 EDL933]	701 / 326 / 836 / 1664	54728.3	0	0	0	0	0	0	664.973	0	774.119	0	0	0	119.924	Cytoplasmic	Inner membrane	498	Inner Membrane	Cytoplasmic	Cytoplasmic	Cytoplasmic	Cytoplasmic	-	-	Cellular processes	Cell division
15800905	Q8X542	NP_286921.1	Z1401	ymcA	L (IM or OM)	putative lipoprotein YmcA [Escherichia coli O157:H7 EDL933]	702 / 1146 / - / 1806	78668.34*	0	0	568.664	274.698	0	171.454	0	185.361	0	107.674	0	130.341	119.849	Outer Membrane	Outer membrane	698	Unknown	X	Extracellular	Extracellular	Outer Membrane	-	-	Cell envelope	Other
15804270	P0ADG0	NP_290309.1	Z5164	ilvN	CY, Ht-4	acetolactate synthase 1 regulatory subunit [Escherichia coli O157:H7 EDL933]	703 / 569 / 363 / 402	11105.4	0	0	0	0	0	0	0	0	0	0	1431.73	0	119.311	Unknown	Cytoplasm	96	Cytoplasmic	Cytoplasmic	Cytoplasmic	Cytoplasmic	Cytoplasmic	-	-	Amino acid biosynthesis	Pyruvate family
15804641	Q8X5V6	NP_290682.1	Z5647	yjbN	CY	tRNA-dihydrouridine synthase A [Escherichia coli O157:H7 EDL933]	704 / - / 962 / -	38457.19*	0	0	0	0	0	0	0	0	848.257	242.477	337.53	0	119.022	Cytoplasmic	Cytoplasm	330	Cytoplasmic	X	Cytoplasmic	Cytoplasmic	Cytoplasmic	-	-	Unknown function	General
161367619	P65737	NP_287224.2	Z1729	plsX	CY/IM	putative glycerol-3-phosphate acyltransferase PlsX [Escherichia coli O157:H7 EDL933]	705 / - / - / -	38260.57*	0	0	0	241.111	0	404.692	0	440.571	0	334.086	0	0	118.372	Unknown	Cytoplasm	356	Unknown	X	Cytoplasmic	Cytoplasmic	Cytoplasmic	-	-	Fatty acid and phospholipid metabolism	Biosynthesis
15800534	P0A740	NP_286546.1	Z1002	moaC	CY	molybdenum cofactor biosynthesis protein C [Escherichia coli O157:H7 EDL933]	706 / 607 / - / -	17466.5	0	0	0	0	0	0	0	618.808	800.576	0	0	0	118.282	Cytoplasmic	Periplasm	161	Unknown	Cytoplasmic	Cytoplasmic	Cytoplasmic	Unknown	-	-	Biosynthesis of cofactors, prosthetic groups, and carriers	Molybdopterin
15804825	P0AFK1	NP_290866.1	Z5845	pmbA	CY	protease involved in Microcin B17 maturation PmbA [Escherichia coli O157:H7 EDL933]	707 / 475 / 1183 / 294	48367.7	592.991	405.108	0	0	0	0	206.279	0	0	206.927	0	0	117.609	Cytoplasmic	Cytoplasm	450	Cytoplasmic	Cytoplasmic	Cytoplasmic	Cytoplasmic	Cytoplasmic	-	-	Cellular processes	Toxin production and resistance
15804174	P0AC77	NP_290213.1	Z5057	kdtA (waaA)	IM	3-deoxy-D-manno-octulosonic-acid transferase [Escherichia coli O157:H7 EDL933]	708 / - / - / -	47351.15*	0	0	0	381.158	0	1023.7	0	0	0	0	0	0	117.072	Unknown	Inner membrane	425	Inner Membrane	X	Cytoplasmic	Cytoplasmic	Inner Membrane	-	-	Cell envelope	Biosynthesis and degradation of surface polysaccharides and lipopolysaccharides
15802889	Q8XCN7	NP_288916.1	Z3606	yfcZ		conserved protein YfcZ [Escherichia coli O157:H7 EDL933]	709 / 382 / 156 / 205	11285.3	0	1395.02	0	0	0	0	0	0	0	0	0	0	116.252	Unknown	Cytoplasm	102	Unknown	Cytoplasmic	Periplasmic	Periplasmic	Cytoplasmic	-	-	Hypothetical proteins	Conserved
15801454	Q8XDD0	NP_287471.1	Z2000	narK	IM	NarK MFS nitrate/nitrite antiporter [Escherichia coli O157:H7 EDL933]	710 / - / - / -	49640.14*	0	0	0	1387.35	0	0	0	0	0	0	0	0	115.612	Cytoplasmic Membrane	Inner membrane	463	Inner Membrane	X	Cytoplasmic	Extracellular	Inner Membrane	-	-	Transport and binding proteins	Anions
15799852	P0A6P3	NP_285864.1	Z0181	tsf	CY, Rib	elongation factor Ts [Escherichia coli O157:H7 EDL933]	711 / 117 / 41 / 627	30421.7	0	0	0	461.252	0	155.111	611.809	157.088	0	0	0	0	115.438	Cytoplasmic	Cytoplasm	283	Cytoplasmic	Cytoplasmic	Cytoplasmic	Cytoplasmic	Cytoplasmic	-	-	Protein synthesis	Translation factors
15804835	P0A7F5	NP_290876.1	Z5855	pyrI	CY	aspartate carbamoyltransferase regulatory subunit [Escherichia coli O157:H7 EDL933]	712 / 742 / 392 / -	17120	0	0	0	0	0	0	0	0	0	0	0	1353.63	112.802	Unknown	Cytoplasm	153	Unknown	Cytoplasmic	Cytoplasmic	Cytoplasmic	Cytoplasmic	-	-	Purines, pyrimidines, nucleosides, and nucleotides	Pyrimidine ribonucleotide biosynthesis
15802781	Q8XE26	NP_288808.1	Z3489	nrdA	CY, Ht-4	ribonucleotide-diphosphate reductase subunit alpha [Escherichia coli O157:H7 EDL933]	713 / 822 / 1434 / 123	85714.9	355.139	0	0	0	0	268.427	249.797	304.15	0	46.2426	0	125.723	112.457	Cytoplasmic	Nucleoid	761	Cytoplasmic	Cytoplasmic	Cytoplasmic	Cytoplasmic	Cytoplasmic	-	-	Purines, pyrimidines, nucleosides, and nucleotides	2'-Deoxyribonucleotide metabolism
15804028	P0AFJ9	NP_290064.1	Z4893	pitA	IM	low-affinity phosphate transport protein [Escherichia coli O157:H7 EDL933]	714 / - / - / -	53387.1	0	0	0	431.147	0	0	0	0	0	903.557	0	0	111.225	Cytoplasmic Membrane	Inner membrane	499	Inner Membrane	Cytoplasmic	Periplasmic	Cytoplasmic	Inner Membrane	-	-	Transport and binding proteins	Anions
161367525	Q8XBP4	NP_289617.2	Z4394	ygiB	L (IM or OM)	hypothetical protein Z4394 [Escherichia coli O157:H7 EDL933]	715 / 904 / - / 1362	23478.3	0	0	630.603	0	0	0	0	0	694.042	0	0	0	110.387	Periplasmic	Periplasm	223	Unknown	Extracellular	Extracellular	Periplasmic	Periplasmic	-	-	Hypothetical proteins	Conserved
15802277	P67176	NP_288301.1	Z2916	yebC	CY	conserved protein YebC [Escherichia coli O157:H7 EDL933]	716 / 624 / 519 / 355	26435.4	0	0	0	0	0	0	0	0	1323.05	0	0	0	110.254	Cytoplasmic	Cytoplasm	246	Unknown	Cytoplasmic	Cytoplasmic	Cytoplasmic	Cytoplasmic	-	-	Hypothetical proteins	Conserved
15800242	P0ACN6	NP_286254.1	Z0660	ybbU	CY, Ho-4	DNA-binding transcriptional repressor AllR [Escherichia coli O157:H7 EDL933]	717 / 757 / 777 / 570	29268.6	0	0	0	0	0	0	0	0	1313	0	0	0	109.417	Unknown	Cytoplasm	271	Cytoplasmic	Cytoplasmic	Cytoplasmic	Cytoplasmic	Cytoplasmic	-	-	Energy metabolism	TCA cycle
15801746	Q8X9R4	NP_287764.1	Z2327	ynbE	L (IM or OM)	putative lipoprotein YnbE [Escherichia coli O157:H7 EDL933]	718 / - / - / -	6814.87	1302.97	0	0	0	0	0	0	0	0	0	0	0	108.58	Unknown	Cytoplasm	61	Unknown	Cytoplasmic	Cytoplasmic	Cytoplasmic	Cytoplasmic	-	-	Cell envelope	Other
161367652	Q8X909	NP_285840.2	Z0155	yadB	CY	glutamyl-Q tRNA(Asp) synthetase [Escherichia coli O157:H7 EDL933]	719 / - / 1088 / -	33616.8	0	0	0	0	0	0	0	0	0	0	1288.38	0	107.365	Cytoplasmic	Cytoplasm	308	Cytoplasmic	Cytoplasmic	Cytoplasmic	Cytoplasmic	Cytoplasmic	-	-	Unclassified	Role category not yet assigned
15800811	Q8XDA6	NP_286827.1	Z1302	ymbA	L (IM or OM)	conserved lipoprotein YmbA [Escherichia coli O157:H7 EDL933]	720 / - / - / -	19948.8	0	0	0	1288.22	0	0	0	0	0	0	0	0	107.352	Unknown	Periplasm	182	Unknown	Periplasmic	Cytoplasmic	Periplasmic	Unknown	-	-	Unknown function	General
15802717	Q8X628	NP_288744.1	Z3418	yeiJ	IM	putative pyrimidine nucleoside transporter [Escherichia coli O157:H7 EDL933]	721 / 688 / 893 / 994	43048.5	0	0	0	0	0	0	0	0	0	0	1281.19	0	106.765	Cytoplasmic Membrane	Inner membrane	413	Inner Membrane	Cytoplasmic	Cytoplasmic	Cytoplasmic	Inner Membrane	-	-	Energy metabolism	Electron transport
15803445	P0ADS4	NP_289478.1	Z4247	ygfE (zapA)	CY/IM, Ht-Mu, divisome	Z-ring-associated protein ZapA [Escherichia coli O157:H7 EDL933]	722 / 513 / 428 / 277	12593.7	926.089	0	0	0	0	0	342.344	0	0	0	0	0	105.703	Unknown	Nucleoid	109	Unknown	Cytoplasmic	Cytoplasmic	Cytoplasmic	Cytoplasmic	-	-	Unclassified	Role category not yet assigned
15800561	Q8X4R8	NP_286573.1	Z1031	glnQ	IM, Ht-5	glutamine ABC transporter ATP-binding protein [Escherichia coli O157:H7 EDL933]	723 / - / 509 / 281	26750.78*	0	0	0	400.103	0	0	0	0	0	838.497	0	0	103.217	Cytoplasmic Membrane	Inner membrane	240	Inner Membrane	X	Cytoplasmic	Cytoplasmic	Cytoplasmic	-	-	Transport and binding proteins	Unknown substrate
75994482	Q7BSV8	YP_325596.1	L7036	etpG	IM, Ht-Mu	type II secretion protein [Escherichia coli O157:H7 EDL933]	724 / - / 753 / -	16237.8	0	1232.54	0	0	0	0	0	0	0	0	0	0	102.712	Cytoplasmic Membrane	Inner membrane	144	Periplasmic	Unknown	Periplasmic	Extracellular	Periplasmic	Inner Membrane	-	No Data	No Data
15804508	P0A860	NP_290548.1	Z5464	tpiA	CY, Ho-2	triosephosphate isomerase [Escherichia coli O157:H7 EDL933]	725 / 90 / 61 / 463	26970.7	0	0	0	0	0	515.379	0	0	710.169	0	0	0	102.129	Cytoplasmic	Cytoplasm	255	Cytoplasmic	Cytoplasmic	Cytoplasmic	Cytoplasmic	Cytoplasmic	-	-	Energy metabolism	Glycolysis/gluconeogenesis
15802511	O85342	NP_288537.1	Z3195	manC	CY	mannose-1-P guanosyltransferase [Escherichia coli O157:H7 EDL933]	726 / - / - / 103	54268.2	0	0	0	0	0	0	0	0	0	927.7	0	293.915	101.801	Cytoplasmic	Cytoplasm	482	Unknown	Cytoplasmic	Cytoplasmic	Cytoplasmic	Cytoplasmic	-	-	Cell envelope	Biosynthesis and degradation of surface polysaccharides and lipopolysaccharides
15804306	Q8XB33	NP_290345.1	Z5204	tnaB	IM	tryptophan permease TnaB [Escherichia coli O157:H7 EDL933]	727 / - / - / 1085	45194.1	0	0	0	0	0	0	0	0	0	1218.67	0	0	101.556	Cytoplasmic Membrane	Inner membrane	415	Inner Membrane	Cytoplasmic	Cytoplasmic	Cytoplasmic	Inner Membrane	-	-	Transport and binding proteins	Amino acids, peptides and amines
15803543	P64576	NP_289576.1	Z4352	yghW		predicted protein YghW [Escherichia coli O157:H7 EDL933]	728 / 840 / - / -	10945.1	0	0	480.809	0	0	732.372	0	0	0	0	0	0	101.098	Unknown	Cytoplasm	95	Unknown	Cytoplasmic	Cytoplasmic	Extracellular	Cytoplasmic	-	-	Hypothetical proteins	Conserved
15803916	Q8X716	NP_289952.1	Z4767	bioH	CY, Ho-1	carboxylesterase BioH [Escherichia coli O157:H7 EDL933]	729 / 915 / 681 / -	28608.2	0	0	0	0	0	0	0	0	956.957	0	0	246.046	100.25	Cytoplasmic	Cytoplasm	256	Extracellular	Cytoplasmic	Cytoplasmic	Cytoplasmic	Unknown	-	-	Biosynthesis of cofactors, prosthetic groups, and carriers	Biotin
15802182	Q8X596	NP_288204.1	Z2804	_	IM (?)	putative transposase protein of insertion sequence IS629 [Escherichia coli O157:H7 EDL933]	730 / - / - / -	12582.7	0	0	0	0	0	0	1201.4	0	0	0	0	0	100.117	Unknown	Cytoplasm	108	Unknown	Cytoplasmic	Cytoplasmic	Extracellular	Cytoplasmic	-	-	Mobile and extrachromosomal element functions	Transposon functions
15803178	Q8X950	NP_289210.1	Z3959	gabD	CY, Ho-4	succinate-semialdehyde dehydrogenase I [Escherichia coli O157:H7 EDL933]	731 / 683 / - / -	51815.2	532.042	0	0	0	0	190.047	0	0	165.406	0	313.835	0	100.111	Cytoplasmic	Cytoplasm	482	Unknown	Cytoplasmic	Cytoplasmic	Cytoplasmic	Cytoplasmic	-	-	Central intermediary metabolism	Other
15801237	Q8X8E0	NP_287254.1	Z1761	cobB	CY	NAD-dependent deacetylase [Escherichia coli O157:H7 EDL933]	732 / 891 / 528 / 890	30935.3	0	0	0	384.966	0	0	0	0	0	813.326	0	0	99.8576	Cytoplasmic	Cytoplasm	273	Cytoplasmic	Cytoplasmic	Cytoplasmic	Cytoplasmic	Cytoplasmic	-	-	Regulatory functions	DNA interactions
15803861	P0A8R6	NP_289895.1	Z4706	slyX		host factor for lysis of φX174 infection [Escherichia coli O157:H7 EDL933]	733 / 160 / 299 / 844	8214.02	0	0	0	0	0	0	1190.6	0	0	0	0	0	99.217	Unknown	Periplasm	72	Unknown	Cytoplasmic	Cytoplasmic	Cytoplasmic	Unknown	-	-	Unknown function	General
15803737	Q8X9J0	NP_289771.1	Z4560	yrbH	CY	D-arabinose 5-phosphate isomerase [Escherichia coli O157:H7 EDL933]	734 / 547 / 700 / 1627	35208.8	0	0	0	0	0	0	0	0	0	733.244	0	456.785	99.1691	Cytoplasmic	Cytoplasm	328	Unknown	Cytoplasmic	Cytoplasmic	Cytoplasmic	Unknown	-	-	Energy metabolism	Electron transport
15804376	P0AG01	NP_290416.1	Z5296	wzzE	IM	lipopolysaccharide biosynthesis protein WzzE [Escherichia coli O157:H7 EDL933]	735 / - / - / -	39618.7	0	0	0	313.625	0	0	0	416.264	0	0	0	459.841	99.1442	Cytoplasmic Membrane	Inner membrane	348	Inner Membrane	Periplasmic	Cytoplasmic	Periplasmic	Inner Membrane	-	-	Cell envelope	Other
15803029	P65291	NP_289059.1	Z3769	yfgH	L (IM or OM)	predicted outer membrane lipoprotein YfgH [Escherichia coli O157:H7 EDL933]	736 / - / - / -	17704.3	0	0	0	0	0	0	0	1165.89	0	0	0	0	97.1577	Outer Membrane	Outer membrane	172	Outer Membrane	Extracellular	Extracellular	Extracellular	Outer Membrane	-	-	Cell envelope	Other
15802218	Q8XDR6	NP_288241.1	Z2848	fadD	CY	long-chain-fatty-acid--CoA ligase [Escherichia coli O157:H7 EDL933]	737 / 882 / 1285 / 190	62361.7	351.162	0	0	0	0	304.22	0	0	0	508.233	0	0	96.9679	Cytoplasmic	Cytoplasm	561	Unknown	Cytoplasmic	Cytoplasmic	Cytoplasmic	Cytoplasmic	-	-	Fatty acid and phospholipid metabolism	Other
15802741	Q8XE69	NP_288768.1	Z3444	rplY	CY, 50S Rib	50S ribosomal protein L25 [Escherichia coli O157:H7 EDL933]	738 / 572 / 484 / 128	10675	592.589	0	0	0	0	0	0	0	0	565.311	0	0	96.4917	Cytoplasmic	Cytoplasm	94	Cytoplasmic	Cytoplasmic	Cytoplasmic	Cytoplasmic	Cytoplasmic	-	-	Protein synthesis	Ribosomal proteins: synthesis and modification
15800470	P0A9G9	NP_286482.1	Z0931	modE	CY, Ho-2	DNA-binding transcriptional regulator ModE [Escherichia coli O157:H7 EDL933]	739 / 908 / 755 / 1300	28280.2	323.322	0	0	0	0	312.232	0	515.486	0	0	0	0	95.92	Cytoplasmic	Cytoplasm	262	Cytoplasmic	Cytoplasmic	Cytoplasmic	Cytoplasmic	Cytoplasmic	-	-	Transport and binding proteins	Anions
15800208	Q8XD36	NP_286220.1	Z0598	fsr	IM	Fsr fosmidomycin MFS transporter [Escherichia coli O157:H7 EDL933]	740 / - / - / -	43307.9	0	0	1141.09	0	0	0	0	0	0	0	0	0	95.0909	Cytoplasmic Membrane	Inner membrane	406	Inner Membrane	Extracellular	Cytoplasmic	Extracellular	Inner Membrane	-	-	Cellular processes	Toxin production and resistance
15802037	Q8X661	NP_288059.1	Z2628	add	CY	adenosine deaminase [Escherichia coli O157:H7 EDL933]	741 / - / 1089 / 68	36400.1	0	0	0	0	0	576.784	0	0	0	563.793	0	0	95.0481	Cytoplasmic	Extracellular	333	Unknown	Cytoplasmic	Cytoplasmic	Cytoplasmic	Cytoplasmic	-	-	Purines, pyrimidines, nucleosides, and nucleotides	Salvage of nucleosides and nucleotides
15802457	Q8X4U6	NP_288483.1	Z3128	_	L (IM or OM)	putative inhibitor of cell division encoded within prophage CP-933U [Escherichia coli O157:H7 EDL933]	742 / - / - / -	6990.83	0	0	0	0	0	0	0	0	0	0	0	1132.91	94.4094	Unknown	Inner membrane	62	Cytoplasmic	Cytoplasmic	Cytoplasmic	Cytoplasmic	Cytoplasmic	-	-	Cellular processes	Cell division
15801899	P0A925	NP_287919.1	Z2529	pgpB	IM	phosphatidylglycerophosphatase B [Escherichia coli O157:H7 EDL933]	743 / - / - / 1489	29020.2	0	0	0	553.188	0	0	0	0	0	574.268	0	0	93.9547	Cytoplasmic Membrane	Outer membrane	254	Inner Membrane	Cytoplasmic	Cytoplasmic	Cytoplasmic	Inner Membrane	-	-	Fatty acid and phospholipid metabolism	Degradation
15800142	P0A8D2	NP_286154.1	Z0514	ybaD	CY	transcriptional regulator NrdR [Escherichia coli O157:H7 EDL933]	744 / - / 467 / 586	17228.2	0	0	0	0	0	0	0	0	0	877.639	0	248.589	93.8523	Cytoplasmic	Cytoplasm	149	Cytoplasmic	Cytoplasmic	Cytoplasmic	Cytoplasmic	Cytoplasmic	-	-	Hypothetical proteins	Conserved
15803203	P0ACS1	NP_289235.1	Z3985	emrR	CY	transcriptional repressor MprA [Escherichia coli O157:H7 EDL933]	745 / - / 534 / 270	20580.54*	0	0	0	0	0	0	0	0	0	0	1115.25	0	92.9377	Cytoplasmic	Cytoplasm	176	Cytoplasmic	X	Cytoplasmic	Cytoplasmic	Cytoplasmic	-	-	Regulatory functions	DNA interactions
15800152	P0A8H1	NP_286164.1	Z0525	xseB	CY	exodeoxyribonuclease VII small subunit [Escherichia coli O157:H7 EDL933]	746 / 720 / 358 / 671	8951.58	0	1104.63	0	0	0	0	0	0	0	0	0	0	92.0521	Cytoplasmic	Cytoplasm	80	Cytoplasmic	Cytoplasmic	Cytoplasmic	Cytoplasmic	Cytoplasmic	-	-	DNA metabolism	Degradation of DNA
15802509	Q7DBF7	NP_288535.1	Z3192	wbdR	CY	acetyl transferase; O-antigen biosynthesis [Escherichia coli O157:H7 EDL933]	747 / - / 1023 / 925	23741.5	0	0	0	0	0	0	0	0	0	1101.79	0	0	91.8156	Cytoplasmic	Cytoplasm	221	Cytoplasmic	Cytoplasmic	Cytoplasmic	Cytoplasmic	Cytoplasmic	-	-	Cell envelope	Biosynthesis and degradation of surface polysaccharides and lipopolysaccharides
15803691	P66818	NP_289725.1	Z4508	yraO	CY	DnaA initiator-associating protein DiaA [Escherichia coli O157:H7 EDL933]	748 / - / 811 / 1391	21105.2	0	0	0	0	0	0	0	0	0	0	0	1091.55	90.9627	Cytoplasmic	Cytoplasm	196	Unknown	Cytoplasmic	Cytoplasmic	Cytoplasmic	Cytoplasmic	-	-	Cell envelope	Biosynthesis and degradation of surface polysaccharides and lipopolysaccharides
15804811	P0ADE5	NP_290852.1	Z5831	ytfM	bb-OM	hypothetical protein Z5831 [Escherichia coli O157:H7 EDL933]	749 / - / - / 1813	64799.33*	388.057	59.3765	0	124.712	0	335.976	0	180.761	0	0	0	0	90.7402	Outer Membrane	Outer membrane	577	Outer Membrane	X	Periplasmic	Periplasmic	Periplasmic	-	-	Cell envelope	Other
15799746	P58538	NP_285758.1	Z0070	araA	CY, Ho-6	L-arabinose isomerase [Escherichia coli O157:H7 EDL933]	750 / 839 / - / -	56087	0	0	0	0	0	0	561.896	0	522.065	0	0	0	90.3301	Cytoplasmic	Cytoplasm	500	Unknown	Cytoplasmic	Cytoplasmic	Cytoplasmic	Cytoplasmic	-	-	Energy metabolism	Sugars
15802510	O85343	NP_288536.1	Z3194	manB	CY	phosphomannomutase [Escherichia coli O157:H7 EDL933]	751 / - / 767 / 181	50337.6	0	0	143.861	136.576	0	0	0	0	291.454	505.632	0	0	89.7936	Cytoplasmic	Cytoplasm	456	Unknown	Cytoplasmic	Cytoplasmic	Cytoplasmic	Cytoplasmic	-	-	Central intermediary metabolism	Other
15803216	Q8X872	NP_289248.1	Z4004	mltB	L-OM	membrane-bound lytic murein transglycosylase B [Escherichia coli O157:H7 EDL933]	752 / - / - / -	40324.3	0	0	0	511.138	0	0	0	0	0	534.098	0	0	87.103	Cytoplasmic Membrane	Periplasm	361	Extracellular	Periplasmic	Periplasmic	Periplasmic	Extracellular	-	-	Cell envelope	Biosynthesis and degradation of murein sacculus and peptidoglycan
15804833	P0ABB9	NP_290874.1	Z5853	mgtA	IM	magnesium-transporting ATPase MgtA [Escherichia coli O157:H7 EDL933]	753 / - / - / -	99510.65*	0	0	0	135.076	0	345.822	0	564.157	0	0	0	0	87.088	Cytoplasmic Membrane	Inner membrane	898	Inner Membrane	X	Cytoplasmic	Cytoplasmic	Inner Membrane	-	-	Transport and binding proteins	Cations and iron carrying compounds
15803899	0	NP_289935.1	Z4750	mrcA	IM, Ho-2	peptidoglycan synthetase [Escherichia coli O157:H7 EDL933]	754 / - / - / 1785	94487.5	0	662.05	0	0	0	108.749	0	0	0	123.702	0	148.517	86.9182	Cytoplasmic Membrane	Inner membrane	850	Inner Membrane	Periplasmic	Cytoplasmic	Periplasmic	Inner Membrane	-	-	Cell envelope	Biosynthesis and degradation of murein sacculus and peptidoglycan
15804427	P0A6A1	NP_290467.1	Z5357	ubiB	IM	putative ubiquinone biosynthesis protein UbiB [Escherichia coli O157:H7 EDL933]	755 / - / - / 822	63200.5	0	0	0	0	0	565.515	0	195.872	0	279.328	0	0	86.7263	Cytoplasmic Membrane	Inner membrane	546	Unknown	Cytoplasmic	Cytoplasmic	Cytoplasmic	Inner Membrane	-	-	Biosynthesis of cofactors, prosthetic groups, and carriers	Menaquinone and ubiquinone
15799862	P0A6Q8	NP_285874.1	Z0192	fabZ	CY, Ho-Mu	(3R)-hydroxymyristoyl-ACP dehydratase [Escherichia coli O157:H7 EDL933]	756 / 312 / 240 / 576	17032.3	0	0	0	0	0	0	0	1039.7	0	0	0	0	86.6418	Cytoplasmic	Cytoplasm	151	Cytoplasmic	Cytoplasmic	Cytoplasmic	Cytoplasmic	Cytoplasmic	-	-	Fatty acid and phospholipid metabolism	Biosynthesis
15800750	Q8X5I1	NP_286764.1	Z1231	cydD	IM, Ht-4	cysteine/glutathione ABC transporter membrane/ATP-binding component [Escherichia coli O157:H7 EDL933]	757 / 978 / - / 1619	65071.43*	0	240.321	0	0	0	0	0	245.58	0	0	0	550.479	86.365	Cytoplasmic Membrane	Inner membrane	588	Inner Membrane	X	Cytoplasmic	Cytoplasmic	Inner Membrane	-	-	Transport and binding proteins	Unknown substrate
15803892	Q8X824	NP_289928.1	Z4742	aroB	CY, Ho-1	3-dehydroquinate synthase [Escherichia coli O157:H7 EDL933]	758 / 498 / 880 / 589	38930.28*	0	0	0	279.949	0	0	0	376.827	0	0	0	372.088	85.7387	Cytoplasmic	Cytoplasm	362	Cytoplasmic	X	Cytoplasmic	Cytoplasmic	Cytoplasmic	-	-	Amino acid biosynthesis	Aromatic amino acid family
15801466	P0A3L9	NP_287483.1	Z2015	tdk2	CY, Ho-4	thymidine kinase [Escherichia coli O157:H7 EDL933]	759 / 817 / 838 / -	23459.53*	0	0	0	0	0	0	0	0	0	0	1010.88	0	84.24	Cytoplasmic	Cytoplasm	205	Cytoplasmic	X	Cytoplasmic	Cytoplasmic	Cytoplasmic	-	-	Purines, pyrimidines, nucleosides, and nucleotides	Nucleotide and nucleoside interconversions
15802927	Q8XBP9	NP_288955.1	Z3651	ypdF	CY	aminopeptidase [Escherichia coli O157:H7 EDL933]	760 / - / - / -	39739.6	0	0	0	202.098	0	0	796.652	0	0	0	0	0	83.2291	Cytoplasmic	Extracellular	361	Cytoplasmic	Cytoplasmic	Cytoplasmic	Cytoplasmic	Cytoplasmic	-	-	Energy metabolism	Electron transport
15800784	Q8XDG1	NP_286798.1	Z1270	mukE	CY, Ht-8, divisome	condesin subunit E [Escherichia coli O157:H7 EDL933]	761 / 533 / 583 / -	25997.4	0	0	0	0	0	0	750.197	0	0	239.222	0	0	82.4516	Cytoplasmic	Nucleoid	225	Cytoplasmic	Cytoplasmic	Cytoplasmic	Cytoplasmic	Cytoplasmic	-	-	Unknown function	General
15801908	Q8X7C3	NP_287928.1	Z2539	yciK	CY	short chain dehydrogenase [Escherichia coli O157:H7 EDL933]	762 / - / 1000 / 282	27969.9	0	0	0	0	0	0	0	0	352.962	0	635.095	0	82.338	Cytoplasmic	Cytoplasm	252	Cytoplasmic	Periplasmic	Cytoplasmic	Periplasmic	Cytoplasmic	-	-	Unknown function	General
161367520	Q8XAE4	NP_289696.2	Z4477	garR	CY	tartronate semialdehyde reductase [Escherichia coli O157:H7 EDL933]	763 / 139 / 1108 / 781	30658.5	0	0	0	0	0	0	659.117	0	0	324.066	0	0	81.9319	Cytoplasmic	Cytoplasm	299	Cytoplasmic	Cytoplasmic	Cytoplasmic	Cytoplasmic	Cytoplasmic	-	-	Unclassified	Role category not yet assigned
15803752	Q8XEF0	NP_289786.1	Z4576	gltB	CY, Ht-2	glutamate synthase subunit alpha [Escherichia coli O157:H7 EDL933]	764 / 845 / 1339 / -	166720.83*	268.231	0	0	0	0	51.3032	124.924	0	0	257.123	276.583	0	81.5137	Cytoplasmic	Cytoplasm	1517	periplasm	X	Cytoplasmic	Cytoplasmic	Cytoplasmic	-	-	Unclassified	Role category not yet assigned
15804657	Q8X5U0	NP_290698.1	Z5664	yjcE	IM	predicted CPA1 family sodium/proton exchanger [Escherichia coli O157:H7 EDL933]	765 / - / - / -	60527.33*	0	0	0	0	0	0	0	969.227	0	0	0	0	80.7689	Cytoplasmic Membrane	Inner membrane	549	Inner Membrane	X	Cytoplasmic	Cytoplasmic	Inner Membrane	-	-	Transport and binding proteins	Cations and iron carrying compounds
15804922	Q8XB69	NP_290964.1	Z5948	_		putative restriction modification enzyme R subunit [Escherichia coli O157:H7 EDL933]	766 / 732 / 1342 / 354	92080.7	257.367	0	0	0	333.528	0	172.083	0	0	0	198.616	0	80.1328	Cytoplasmic	Cytoplasm	810	Cytoplasmic	Cytoplasmic	Cytoplasmic	Cytoplasmic	Cytoplasmic	-	-	DNA metabolism	DNA replication, recombination, and repair
15803595	Q8XBM3	NP_289628.1	Z4406	glnE	CY	bifunctional glutamine-synthetase adenylyltransferase/deadenyltransferase [Escherichia coli O157:H7 EDL933]	767 / 907 / - / 1413	108493	169.109	143.113	0	0	0	0	0	354.882	0	0	291.584	0	79.8907	Cytoplasmic Membrane	Cytoplasm	946	Unknown	Cytoplasmic	Cytoplasmic	Cytoplasmic	Cytoplasmic	-	-	Protein synthesis	Translation factors
15803342	Q8X6M6	NP_289375.1	Z4140	ppdC	IM	prepilin peptidase-dependent protein C [Escherichia coli O157:H7 EDL933]	768 / - / - / -	11975.5	0	0	0	0	0	0	0	0	0	0	957.197	0	79.7664	Unknown	Periplasm	107	Unknown	Periplasmic	Periplasmic	Periplasmic	Inner Membrane	-	-	Energy metabolism	Electron transport
161367630	P58423	NP_286589.2	Z1048	fasA (mipB)	CY, Ho-12	fructose-6-phosphate aldolase [Escherichia coli O157:H7 EDL933]	769 / 884 / - / -	23112	0	0	0	0	0	0	950.867	0	0	0	0	0	79.239	Cytoplasmic	Cytoplasm	220	Cytoplasmic	Cytoplasmic	Cytoplasmic	Cytoplasmic	Cytoplasmic	-	-	Energy metabolism	Pentose phosphate pathway
15803206	Q8X902	NP_289238.1	Z3988	ygaG	CY	S-ribosylhomocysteinase [Escherichia coli O157:H7 EDL933]	770 / 675 / 369 / 86	19443.6	0	0	0	946.46	0	0	0	0	0	0	0	0	78.8717	Cytoplasmic	Extracellular	171	Unknown	Cytoplasmic	Cytoplasmic	Cytoplasmic	Cytoplasmic	-	-	Cellular processes	Other
15804812	Q8XCG2	NP_290853.1	Z5832	ytfN	IM	uncharacterized membrane protein YtfN [Escherichia coli O157:H7 EDL933]	771 / - / 1457 / -	136910.25*	112.07	173.025	285.376	0	0	0	0	211.732	0	161.84	0	0	78.6702	Unknown/Multiple Localization	Cytoplasm	1259	Unknown	X	Cytoplasmic	Periplasmic	Inner Membrane	-	-	Unknown function	General
15800454	P0ABV8	NP_286466.1	Z0906	tolR	IM, Ht-7	colicin uptake protein TolR [Escherichia coli O157:H7 EDL933]	772 / - / - / -	15382.4	0	0	0	0	0	0	0	939.103	0	0	0	0	78.2586	Cytoplasmic Membrane	Inner membrane	142	Inner Membrane	Cytoplasmic	Cytoplasmic	Cytoplasmic	Cytoplasmic	-	-	Cellular processes	Toxin production and resistance
15803080	P0AD45	NP_289111.1	Z3831	yfhG	L (IM or OM)	conserved putative lipoprotein YfhG [Escherichia coli O157:H7 EDL933]	773 / - / - / -	27346.9	0	0	512.627	418.755	0	0	0	0	0	0	0	0	77.6152	Unknown	Cytoplasm	237	Unknown	Cytoplasmic	Periplasmic	Cytoplasmic	Outer Membrane	-	-	Energy metabolism	Electron transport
15802301	P0AF07	NP_288326.1	Z2943	motB	IM, Ht-Mu	flagellar motor protein MotB [Escherichia coli O157:H7 EDL933]	774 / - / - / 1817	34184.7	0	0	0	211.311	0	257.262	0	458.819	0	0	0	0	77.2827	Cytoplasmic Membrane	Inner membrane	308	Inner Membrane	Cytoplasmic	Cytoplasmic	Periplasmic	Cytoplasmic	-	-	Cellular processes	Chemotaxis and motility
15804128	Q8XDJ1	NP_290167.1	Z5008	aldB	CY, Ho-4	aldehyde dehydrogenase B (lactaldehyde dehydrogenase) [Escherichia coli O157:H7 EDL933]	775 / 909 / - / 884	59766	0	0	0	0	0	0	0	0	293.581	0	633.516	0	77.2581	Cytoplasmic	Cytoplasm	542	Cytoplasmic	Cytoplasmic	Cytoplasmic	Cytoplasmic	Cytoplasmic	-	-	Energy metabolism	Other
15801748	Q8X9Q7	NP_287766.1	Z2329	topA	CY, Ho-1	D-lactate dehydrogenase [Escherichia coli O157:H7 EDL933]	776 / 244 / 985 / 711	36519.4	0	0	0	0	0	0	923.418	0	0	0	0	0	76.9515	Cytoplasmic	Cytoplasm	329	Cytoplasmic	Cytoplasmic	Cytoplasmic	Cytoplasmic	Cytoplasmic	-	-	Energy metabolism	Fermentation
15800368	Q8XBL7	NP_286380.1	Z0804	gltJ	IM, Ht-4	glutamate/aspartate transport system permease [Escherichia coli O157:H7 EDL933]	777 / - / - / -	27565.8	0	0	0	0	0	915.556	0	0	0	0	0	0	76.2964	Cytoplasmic Membrane	Inner membrane	246	Inner Membrane	Cytoplasmic	Cytoplasmic	Cytoplasmic	Inner Membrane	-	-	Transport and binding proteins	Amino acids, peptides and amines
15801479	Q8XCC1	NP_287496.1	Z2031	yciA	CY	acyl-CoA thioester hydrolase [Escherichia coli O157:H7 EDL933]	778 / - / 1042 / 384	14216	0	0	0	0	0	0	0	905.315	0	0	0	0	75.4429	Unknown	Cytoplasm	132	Unknown	Cytoplasmic	Cytoplasmic	Cytoplasmic	Cytoplasmic	-	-	Unknown function	General
15804131	Q8XDI8	NP_290170.1	Z5011	selB	CY	selenocysteinyl-tRNA-specific translation factor [Escherichia coli O157:H7 EDL933]	779 / 1016 / 1222 / 364	68801.9	0	140.034	0	126.683	0	158.886	0	346.361	0	132.267	0	0	75.3525	Cytoplasmic	Cytoplasm	614	Cytoplasmic	Cytoplasmic	Cytoplasmic	Cytoplasmic	Cytoplasmic	-	-	Protein synthesis	Translation factors
15801233	P0ADC5	NP_287250.1	Z1757	lolC (ycfU)	IM, Ht-5	outer membrane-specific lipoprotein transporter subunit LolC [Escherichia coli O157:H7 EDL933]	780 / - / - / -	43262.2	0	637.046	0	0	0	0	0	0	0	0	263.864	0	75.0758	Cytoplasmic Membrane	Inner membrane	399	Inner Membrane	Periplasmic	Cytoplasmic	Cytoplasmic	Inner Membrane	-	-	Transport and binding proteins	Other
15803502	Q8XCS6	NP_289535.1	Z4308	mltC	L-OM	membrane-bound lytic murein transglycosylase C [Escherichia coli O157:H7 EDL933]	781 / - / - / -	40184.1	0	0	0	0	0	897.436	0	0	0	0	0	0	74.7864	Unknown	Outer membrane	359	Extracellular	Extracellular	Cytoplasmic	Extracellular	Outer Membrane	-	-	Cell envelope	Biosynthesis and degradation of murein sacculus and peptidoglycan
15803106	P68067	NP_289137.1	Z3862	yfiD	CY	autonomous glycyl radical cofactor GrcA [Escherichia coli O157:H7 EDL933]	782 / 707 / 71 / 56	14299.38*	0	0	0	0	0	0	355.726	0	541.092	0	0	0	74.7348	Cytoplasmic	Cytoplasm	127	Unknown	X	Cytoplasmic	Cytoplasmic	Cytoplasmic	-	-	Energy metabolism	Anaerobic
161367628	P64176	NP_286650.2	Z1115	macA	IM, Ht-3	macrolide transporter subunit MacA [Escherichia coli O157:H7 EDL933]	783 / - / - / 1532	40637.4	0	0	0	895.665	0	0	0	0	0	0	0	0	74.6388	Cytoplasmic Membrane	Inner membrane	371	Inner Membrane	Cytoplasmic	Cytoplasmic	Cytoplasmic	Unknown	-	-	Protein fate	Protein and peptide secretion and trafficking
15801412	Q8X4I9	NP_287429.1	Z1953	dadX	CY, Ho-2	alanine racemase [Escherichia coli O157:H7 EDL933]	784 / 211 / 180 / 1295	38857.2	0	0	0	0	0	0	0	0	0	894.954	0	0	74.5795	Cytoplasmic	Extracellular	356	Cytoplasmic	Cytoplasmic	Cytoplasmic	Cytoplasmic	Unknown	-	-	Cell envelope	Biosynthesis and degradation of murein sacculus and peptidoglycan
15804606	Q8X5Z7	NP_290647.1	Z5611	yjbB	IM	putative alpha helix protein [Escherichia coli O157:H7 EDL933]	785 / 1087 / - / -	59443.7	0	0	0	0	0	0	0	0	0	892.612	0	0	74.3844	Cytoplasmic Membrane	Inner membrane	543	Inner Membrane	Cytoplasmic	Cytoplasmic	Cytoplasmic	Inner Membrane	-	-	Transport and binding proteins	Anions
15804501	P0AE84	NP_290541.1	Z5456	cpxA	IM	two-component sensor protein [Escherichia coli O157:H7 EDL933]	786 / - / - / -	51640.11*	300.312	0	245.217	0	0	257.972	0	0	0	85.6189	0	0	74.0933	Cytoplasmic Membrane	Inner membrane	457	Inner Membrane	X	Periplasmic	Cytoplasmic	Inner Membrane	-	-	Unknown function	Enzymes of unknown specificity
161367636	Q8XCT7	NP_286277.2	Z0683	ybcJ		predicted RNA-binding protein YbcJ [Escherichia coli O157:H7 EDL933]	787 / - / 678 / 1340	7389.26	0	0	0	0	0	0	0	0	0	0	884.934	0	73.7445	Unknown	Cytoplasm	77	Cytoplasmic	Cytoplasmic	Cytoplasmic	Cytoplasmic	Unknown	-	-	Hypothetical proteins	Conserved
15803100	P0AGB8	NP_289131.1	Z3855	rpoE	CY, Ht-5	RNA polymerase sigma factor RpoE [Escherichia coli O157:H7 EDL933]	788 / - / 958 / -	21694.9	407.94	0	0	0	0	0	0	472.884	0	0	0	0	73.402	Cytoplasmic	Cytoplasm	191	Cytoplasmic	Cytoplasmic	Cytoplasmic	Cytoplasmic	Cytoplasmic	-	-	Transcription	Transcription factors
15804390	P0ACB9	NP_290430.1	Z5316	hemY	IM	putative protoheme IX biogenesis protein [Escherichia coli O157:H7 EDL933]	789 / 931 / 268 / 1364	45243.4	0	0	0	0	0	0	0	0	0	232.006	0	642.219	72.8521	Cytoplasmic Membrane	Inner membrane	398	Unknown	Cytoplasmic	Cytoplasmic	Cytoplasmic	Inner Membrane	-	-	Unknown function	General
15801150	Q8X9K1	NP_287167.1	Z1666	(ghrA) ycdW	CY	glyoxalate reductase / hydroxypyruvate reductase [Escherichia coli O157:H7 EDL933]	790 / 199 / 549 / 1218	36852.8	0	0	0	0	0	0	0	0	0	388.439	0	484.85	72.774	Cytoplasmic	Cytoplasm	312	Cytoplasmic	Cytoplasmic	Cytoplasmic	Cytoplasmic	Periplasmic	-	-	Central intermediary metabolism	Other
15804221	P58233	NP_290260.1	Z5111	cetT	CY	Tir chaperone CesT [Escherichia coli O157:H7 EDL933]	791 / 692 / 946 / 72	17680.3	0	0	0	0	0	0	0	0	0	870.843	0	0	72.5703	Cytoplasmic	Cytoplasm	156	Cytoplasmic	Cytoplasmic	Cytoplasmic	Cytoplasmic	Cytoplasmic	-	-	Unclassified	Role category not yet assigned
15803356	Q8X6J8	NP_289389.1	Z4154	aas	IM	bifunctional acyl-[acyl carrier protein] synthetase/2-acylglycerophosphoethanolamine acyltransferase [Escherichia coli O157:H7 EDL933]	792 / - / 1454 / 1714	80761.1	81.1053	0	0	0	0	413.613	0	146.118	0	228.972	0	0	72.4841	Cytoplasmic Membrane	Inner membrane	719	Inner Membrane	Cytoplasmic	Cytoplasmic	Cytoplasmic	Unknown	-	-	Fatty acid and phospholipid metabolism	Biosynthesis
15804370	Q8XAT4	NP_290410.1	Z5290	rhlB	CY, Ho-2, degradosome	ATP-dependent RNA helicase RhlB [Escherichia coli O157:H7 EDL933]	793 / 1013 / 1252 / 405	47091.1	0	0	0	0	0	0	0	0	0	867.834	0	0	72.3195	Cytoplasmic	Cytoplasm	421	Cytoplasmic	Cytoplasmic	Cytoplasmic	Cytoplasmic	Periplasmic	-	-	Transcription	Degradation of RNA
15803789	P0ABE0	NP_289823.1	Z4615	accB	CY, Ho-2, Ht-8	acetyl-CoA carboxylase biotin carboxyl carrier protein subunit [Escherichia coli O157:H7 EDL933]	794 / 307 / 131 / 691	16686.5	0	0	0	0	0	0	0	0	0	867.703	0	0	72.3086	Cytoplasmic	Cytoplasm	156	Unknown	Cytoplasmic	Cytoplasmic	Cytoplasmic	Unknown	-	-	Fatty acid and phospholipid metabolism	Biosynthesis
15800229	Q8X570	NP_286241.1	Z0645	ybbN	CY, Ho-4, Ht-Mu	putative thioredoxin-like protein [Escherichia coli O157:H7 EDL933]	795 / 149 / 191 / 1021	33055.3	0	0	0	0	0	0	0	0	0	865.836	0	0	72.153	Cytoplasmic	Outer membrane	296	periplasm	Cytoplasmic	Cytoplasmic	Cytoplasmic	Cytoplasmic	-	-	Energy metabolism	Electron transport
15801663	Q8XAS2	NP_287681.1	Z2236	fdnG	IM	formate dehydrogenase-N, nitrate-inducible, alpha subunit [Escherichia coli O157:H7 EDL933]	796 / 975 / - / -	112919	0	0	102.657	0	0	0	0	75.9075	0	352.371	0	334.848	72.1486	Periplasmic	Periplasm	1015	periplasm	Periplasmic	Periplasmic	Periplasmic	Periplasmic	-	-	Energy metabolism	Anaerobic
15800168	P0A6H3	NP_286180.1	Z0543	clpX	CY, Ho-6, Ht-26	ATP-dependent protease ATP-binding subunit [Escherichia coli O157:H7 EDL933]	797 / 1019 / 1102 / 258	46354.3	863.507	0	0	0	0	0	0	0	0	0	0	0	71.9589	Cytoplasmic	Cytoplasm	424	Cytoplasmic	Cytoplasmic	Cytoplasmic	Cytoplasmic	Cytoplasmic	-	-	Protein fate	Degradation of proteins, peptides, and glycopeptides
15804080	Q8X5L2	NP_290118.1	Z4954	yhjU	IM	hypothetical protein Z4954 [Escherichia coli O157:H7 EDL933]	798 / - / - / -	62091.43*	0	0	0	380.538	0	478.281	0	0	0	0	0	0	71.5682	Cytoplasmic Membrane	Inner membrane	559	Unknown	X	Cytoplasmic	Cytoplasmic	Inner Membrane	-	-	Hypothetical proteins	Conserved
15801867	Q8X7G7	NP_287887.1	Z2487	ordL		oxidoreductase [Escherichia coli O157:H7 EDL933]	799 / - / - / -	47084.5	0	0	0	0	0	0	728.647	0	0	0	0	125.37	71.1681	Cytoplasmic	Periplasm	426	Cytoplasmic	Cytoplasmic	Cytoplasmic	Cytoplasmic	Cytoplasmic	-	-	Energy metabolism	Aerobic
15803286	Q8X7T4	NP_289318.1	Z4078	ygcP	CY	putative anti-terminator regulatory protein [Escherichia coli O157:H7 EDL933]	800 / - / - / 1256	20805.44*	0	0	0	0	0	0	852.905	0	0	0	0	0	71.0754	Cytoplasmic	Cytoplasm	191	Cytoplasmic	X	Cytoplasmic	Cytoplasmic	Unknown	-	-	Energy metabolism	Aerobic
15802473	Q8X8U9	NP_288499.1	Z3152	cobS	IM	cobalamin synthase [Escherichia coli O157:H7 EDL933]	801 / 912 / - / -	26394.7	0	0	0	0	0	539.933	0	0	0	0	0	309.894	70.8189	Cytoplasmic Membrane	Inner membrane	247	Cytoplasmic	Cytoplasmic	Cytoplasmic	Cytoplasmic	Inner Membrane	-	-	Biosynthesis of cofactors, prosthetic groups, and carriers	Heme, porphyrin, and cobalamin
15803334	Q8X6P5	NP_289367.1	Z4129	ygdL	IM	CSD sulfur transfer protein [Escherichia coli O157:H7 EDL933]	802 / - / - / 1438	28471.7	0	0	0	0	0	0	0	845.248	0	0	0	0	70.4374	Cytoplasmic	Cytoplasm	268	Unknown	Cytoplasmic	Cytoplasmic	Cytoplasmic	Unknown	-	-	Energy metabolism	Electron transport
15803424	Q8XD59	NP_289457.1	Z4226	ygfU	IM	putative permease [Escherichia coli O157:H7 EDL933]	803 / - / - / -	54462.1*	0	0	0	0	0	0	845.044	0	0	0	0	0	70.4203	Cytoplasmic Membrane	Inner membrane	505	Inner Membrane	X	Cytoplasmic	Cytoplasmic	Inner Membrane	-	-	Energy metabolism	Electron transport
15801997	Q8X7A0	NP_288018.1	Z2570	(ynfB)	L (IM or OM)	uncharacterized protein YnfB [Escherichia coli O157:H7 EDL933]	804 / - / 569 / 999	12901.1	0	0	840.396	0	0	0	0	0	0	0	0	0	70.033	Unknown	Cytoplasm	113	Unknown	Cytoplasmic	Extracellular	Periplasmic	Outer Membrane	-	-	Hypothetical proteins	Conserved
15800376	Q8XBJ9	NP_286388.1	Z0821	asnB	CY, Ho-2	asparagine synthetase B [Escherichia coli O157:H7 EDL933]	805 / 754 / 854 / 337	62670.6	0	0	0	0	0	0	0	0	0	0	653.237	186.772	70.0008	Cytoplasmic	Cytoplasm	554	Cytoplasmic	Cytoplasmic	Cytoplasmic	Cytoplasmic	Cytoplasmic	-	-	Amino acid biosynthesis	Aspartate family
15799786	Q8X988	NP_285798.1	Z0112	yacF		conserved protein YacF [Escherichia coli O157:H7 EDL933]	806 / - / - / 413	28306.8	0	0	0	0	0	397.289	0	0	0	441.714	0	0	69.9169	Cytoplasmic	Periplasm	247	Unknown	Cytoplasmic	Cytoplasmic	Cytoplasmic	Unknown	-	-	Hypothetical proteins	Conserved
15801327	Q8X738	NP_287344.1	Z1859	phoP	CY	DNA-binding transcriptional regulator PhoP [Escherichia coli O157:H7 EDL933]	807 / 570 / 459 / 62	25481.2	0	0	0	0	0	0	0	824.182	0	0	0	0	68.6818	Cytoplasmic	Cytoplasm	223	Cytoplasmic	Cytoplasmic	Cytoplasmic	Cytoplasmic	Cytoplasmic	-	-	Regulatory functions	Other
15802521	P0AAB7	NP_288547.1	Z3205	galF	CY, Ht-2	UTP--glucose-1-phosphate uridylyltransferase subunit [Escherichia coli O157:H7 EDL933]	808 / 773 / 633 / 98	32828	375.419	0	0	0	0	441.754	0	0	0	0	0	0	68.0977	Cytoplasmic	Cytoplasm	297	Cytoplasmic	Cytoplasmic	Cytoplasmic	Cytoplasmic	Cytoplasmic	-	-	Unclassified	Role category not yet assigned
15803115	Q8X9F3	NP_289146.1	Z3872	kgtP	IM	alpha-ketoglutarate transporter [Escherichia coli O157:H7 EDL933]	809 / - / - / -	47211.91*	0	0	0	0	0	809.09	0	0	0	0	0	0	67.4241	Cytoplasmic Membrane	Inner membrane	432	Inner Membrane	X	Cytoplasmic	Cytoplasmic	Inner Membrane	-	-	Transport and binding proteins	Carbohydrates, organic alcohols, and acids
15804855	Q8XCA2	NP_290896.1	Z5875	yjgR		predicted ATPase YjgR [Escherichia coli O157:H7 EDL933]	810 / - / 1153 / 791	54364.2	456.505	350.6	0	0	0	0	0	0	0	0	0	0	67.2587	Unknown	Cytoplasm	500	Unknown	Cytoplasmic	Cytoplasmic	Cytoplasmic	Cytoplasmic	-	-	Cellular processes	Toxin production and resistance
15802192	P0A748	NP_288214.1	Z2817	msrB (yeaA)	CY	methionine sulfoxide reductase B [Escherichia coli O157:H7 EDL933]	811 / 509 / 67 / 254	15450.6	0	0	0	0	0	0	0	0	0	800.289	0	0	66.6907	Cytoplasmic	Cytoplasm	137	Unknown	Cytoplasmic	Periplasmic	Cytoplasmic	Cytoplasmic	-	-	Unknown function	General
15800375	Q8XBK0	NP_286387.1	Z0811	ubiF	CY	2-octaprenyl-3-methyl-6-methoxy-1,4-benzoquinol hydroxylase [Escherichia coli O157:H7 EDL933]	812 / - / - / 1420	43004.62*	0	0	0	0	0	0	0	0	0	344.562	0	455.519	66.6734	Unknown	Cytoplasm	391	Cytoplasmic	X	Cytoplasmic	Cytoplasmic	Unknown	-	-	Unknown function	General
15802705	Q8X5D9	NP_288732.1	Z3404	mglA	IM, Ht-5	galactose/methyl galaxtoside transporter ATP-binding protein [Escherichia coli O157:H7 EDL933]	813 / 1182 / - / 250	56419.12*	0	425.046	0	0	238.226	0	0	0	0	135.121	0	0	66.5327	Cytoplasmic Membrane	Inner membrane	506	Inner Membrane	X	Cytoplasmic	Cytoplasmic	Cytoplasmic	-	-	Transport and binding proteins	Unknown substrate
161367517	Q8X9L1	NP_289751.2	Z4539	folP	CY, Ho-2	dihydropteroate synthase [Escherichia coli O157:H7 EDL933]	814 / 446 / 702 / -	30613.9	0	0	0	0	0	0	0	0	0	796.632	0	0	66.386	Cytoplasmic	Periplasm	297	Unknown	Cytoplasmic	Cytoplasmic	Cytoplasmic	Cytoplasmic	-	-	Biosynthesis of cofactors, prosthetic groups, and carriers	Folic acid
15801381	Q8XDQ1	NP_287398.1	Z1921	_		putative catalase encoded by prophage CP-933X [Escherichia coli O157:H7 EDL933]	815 / - / - / -	32166.8	0	0	0	0	0	0	0	0	0	0	792.128	0	66.0107	Unknown	Cytoplasm	296	periplasm	Cytoplasmic	Cytoplasmic	Cytoplasmic	Cytoplasmic	-	-	Mobile and extrachromosomal element functions	Prophage functions
15803866	P63390	NP_289900.1	Z4713	yheS	IM	putative ABC transporter ATP-binding protein [Escherichia coli O157:H7 EDL933]	816 / 1022 / - / 693	71830.56*	0	0	246.261	130.257	0	0	0	0	0	119.606	292.494	0	65.7182	Cytoplasmic	Inner membrane	637	Unknown	X	Cytoplasmic	Cytoplasmic	Cytoplasmic	-	-	Transport and binding proteins	Unknown substrate
15803262	Q8X7Y6	NP_289294.1	Z4053	truD	CY	tRNA pseudouridine synthase D [Escherichia coli O157:H7 EDL933]	817 / - / 776 / 551	39103.1	0	0	0	0	0	0	0	0	787.824	0	0	0	65.652	Cytoplasmic	Extracellular	349	Unknown	Cytoplasmic	Cytoplasmic	Cytoplasmic	Cytoplasmic	-	-	Hypothetical proteins	Conserved
15801326	Q8X739	NP_287343.1	Z1858	phoQ	IM	sensor protein PhoQ [Escherichia coli O157:H7 EDL933]	818 / - / - / 1012	52341	0	0	0	0	0	152.84	79.2579	550.564	0	0	0	0	65.2218	Cytoplasmic Membrane	Inner membrane	486	Inner Membrane	Cytoplasmic	Cytoplasmic	Cytoplasmic	Inner Membrane	-	-	Regulatory functions	Other
15803612	Q8XAN2	NP_289645.1	Z4424	yqjI		predicted protein Z4424 [Escherichia coli O157:H7 EDL933]	819 / 1096 / - / 1237	23413.6	0	0	0	0	0	0	0	0	0	0	772.637	0	64.3864	Cytoplasmic	Cytoplasm	207	Cytoplasmic	Cytoplasmic	Cytoplasmic	Cytoplasmic	Cytoplasmic	-	-	Regulatory functions	DNA interactions
15800844	Q8X576	NP_286860.1	Z1338	(ydaV)		putative DNA replication factor encoded within cryptic prophage CP-933M [Escherichia coli O157:H7 EDL933]	820 / - / - / -	27959	0	0	0	0	0	0	0	771.48	0	0	0	0	64.29	Unknown	Cytoplasm	248	Cytoplasmic	Cytoplasmic	Cytoplasmic	Periplasmic	Cytoplasmic	-	-	Mobile and extrachromosomal element functions	Prophage functions
15800543	P0AFQ0	NP_286555.1	Z1012	ybhR	IM	inner membrane transport permease YbhR [Escherichia coli O157:H7 EDL933]	821 / - / - / -	41570.15*	0	0	0	0	0	771.421	0	0	0	0	0	0	64.2851	Cytoplasmic Membrane	Inner membrane	368	Inner Membrane	X	Cytoplasmic	Cytoplasmic	Inner Membrane	-	-	Cell envelope	Other
15799884	Q8X7Z6	NP_285896.1	Z0230	yafC	CY	putative transcriptional regulator LYSR-type [Escherichia coli O157:H7 EDL933]	822 / 881 / - / 1363	33721.4	0	0	0	0	0	0	0	0	0	0	0	770	64.1667	Cytoplasmic	Cytoplasm	304	Cytoplasmic	Cytoplasmic	Cytoplasmic	Cytoplasmic	Cytoplasmic	-	-	Regulatory functions	Other
15803450	P0A8S3	NP_289483.1	Z4253	iciA	CY	chromosome replication initiation inhibitor protein [Escherichia coli O157:H7 EDL933]	823 / 836 / - / 852	33470.5	0	0	0	0	0	380.881	0	0	0	388.862	0	0	64.1453	Cytoplasmic	Cytoplasm	297	Cytoplasmic	Cytoplasmic	Cytoplasmic	Cytoplasmic	Cytoplasmic	-	-	DNA metabolism	DNA replication, recombination, and repair
15804964	P0A882	NP_291006.1	Z5995	trpR	CY	Trp operon repressor [Escherichia coli O157:H7 EDL933]	824 / - / 300 / 1598	12354.7	0	0	0	0	0	751.849	0	0	0	0	0	0	62.6541	Cytoplasmic	Cytoplasm	108	Cytoplasmic	Cytoplasmic	Cytoplasmic	Cytoplasmic	Cytoplasmic	-	-	Amino acid biosynthesis	Aromatic amino acid family
15801709	Q8X9V8	NP_287727.1	Z2285	ydcN		predicted DNA-binding transcriptional regulator YdcN [Escherichia coli O157:H7 EDL933]	825 / - / - / 1225	19752.7	746.807	0	0	0	0	0	0	0	0	0	0	0	62.2339	Unknown	Cytoplasm	178	Cytoplasmic	Cytoplasmic	Cytoplasmic	Cytoplasmic	Cytoplasmic	-	-	Regulatory functions	DNA interactions
15803103	Q8XA21	NP_289134.1	Z3859	srmB	CY	DEAD-box RNA helicase SrmB [Escherichia coli O157:H7 EDL933]	826 / 899 / 848 / 397	49901.88*	293.763	0	0	0	0	236.515	0	0	0	212.134	0	0	61.8677	Cytoplasmic	Cytoplasm	444	Cytoplasmic	X	Cytoplasmic	Cytoplasmic	Cytoplasmic	-	-	Transcription	Transcription factors
15802862	Q8XCR3	NP_288889.1	Z3577	folC	CY	bifunctional folylpolyglutamate synthase/ dihydrofolate synthase [Escherichia coli O157:H7 EDL933]	827 / 523 / 445 / 849	45395.8	435.764	0	0	0	0	0	305.066	0	0	0	0	0	61.7358	Cytoplasmic	Cytoplasm	422	Cytoplasmic	Cytoplasmic	Cytoplasmic	Cytoplasmic	Cytoplasmic	-	-	Biosynthesis of cofactors, prosthetic groups, and carriers	Folic acid
15804031	Q8X5Q8	NP_290067.1	Z4896	dtpB (yhiP)	IM	DtpB dipeptide inner membrane transporter [Escherichia coli O157:H7 EDL933]	828 / - / - / -	53575.3	0	0	0	740.639	0	0	0	0	0	0	0	0	61.72	Cytoplasmic Membrane	Inner membrane	489	Inner Membrane	Cytoplasmic	Cytoplasmic	Cytoplasmic	Inner Membrane	-	-	Transport and binding proteins	Amino acids, peptides and amines
15800642	Q8XAK0	NP_286656.1	Z1121	_	IM	putative inner membrane protein Z1121 [Escherichia coli O157:H7 EDL933]	829 / - / - / 297	70828	0	0	0	166.67	0	0	0	157.883	240.986	0	0	172.286	61.4854	Cytoplasmic	Cytoplasm	605	Unknown	Cytoplasmic	Cytoplasmic	Cytoplasmic	Cytoplasmic	-	-	Unknown function	General
15799743	P60241	NP_285755.1	Z0067	hepA	CY	ATP-dependent helicase HepA [Escherichia coli O157:H7 EDL933]	830 / 749 / 1230 / 1381	109765	148.785	0	0	210.709	0	0	0	140.432	0	112.31	0	123.695	61.3276	Cytoplasmic	Cytoplasm	968	Cytoplasmic	Cytoplasmic	Cytoplasmic	Cytoplasmic	Cytoplasmic	-	-	Transcription	Transcription factors
15801799	Q8X8S4	NP_287817.1	Z2390	_		unknown protein encoded within prophage CP-933R Z2390 [Escherichia coli O157:H7 EDL933]	831 / - / - / -	9447.68	0	0	0	0	0	0	0	0	0	0	735.655	0	61.3046	Cytoplasmic	Cytoplasm	85	Unknown	Cytoplasmic	Cytoplasmic	Cytoplasmic	Cytoplasmic	-	-	Hypothetical proteins	Conserved
15801897	P0AB60	NP_287917.1	Z2526	yciM		hypothetical protein Z2526 [Escherichia coli O157:H7 EDL933]	832 / - / - / 1525	44529.3	0	0	0	0	0	0	0	0	0	734.652	0	0	61.221	Cytoplasmic	Cytoplasm	389	Unknown	Cytoplasmic	Cytoplasmic	Cytoplasmic	Cytoplasmic	-	-	Hypothetical proteins	Conserved
15801593	P0ACM3	NP_287610.1	Z2157	ydfH		uncharacterized HTH-type transcriptional regulator YdfH [Escherichia coli O157:H7 EDL933]	833 / - / - / 436	26545.7*	0	0	730.613	0	0	0	0	0	0	0	0	0	60.8844	Cytoplasmic	Cytoplasm	228	Cytoplasmic	X	Cytoplasmic	Cytoplasmic	Cytoplasmic	-	-	Unknown function	General
15800907	Q8XC20	NP_286923.1	Z1403	ymcC	L (IM or OM)	putative membrane-bound regulator YmcC [Escherichia coli O157:H7 EDL933]	834 / - / - / -	24247.7	0	727.586	0	0	0	0	0	0	0	0	0	0	60.6321	Cytoplasmic Membrane	Inner membrane	214	periplasm	Periplasmic	Cytoplasmic	Periplasmic	Outer Membrane	-	-	Energy metabolism	Electron transport
15804974	Q8XB00	NP_291016.1	Z6006	lasT	CY, Ho-2	putative RNA methyltransferase [Escherichia coli O157:H7 EDL933]	835 / 824 / 720 / 1114	25307.59*	0	0	0	337.524	0	0	0	0	0	389.168	0	0	60.5577	Cytoplasmic	Cytoplasm	228	Cytoplasmic	X	Cytoplasmic	Cytoplasmic	Unknown	-	-	Protein synthesis	tRNA and rRNA base modification
15800629	Q8X6L4	NP_286643.1	Z1105	poxB	CY, Ho-4	pyruvate dehydrogenase [Escherichia coli O157:H7 EDL933]	836 / 1097 / - / -	62006.9	292.425	0	0	0	0	0	0	0	0	426.801	0	0	59.9355	Cytoplasmic Membrane	Cytoplasm	572	Unknown	Cytoplasmic	Cytoplasmic	Cytoplasmic	Cytoplasmic	-	-	Energy metabolism	Other
15803977	Q8X6R0	NP_290013.1	Z4839	yhhF	CY, Rib	16S rRNA m(2)G966-methyltransferase [Escherichia coli O157:H7 EDL933]	837 / - / - / 809	21706.8	0	0	0	0	0	0	0	709.347	0	0	0	0	59.1122	Cytoplasmic	Cytoplasm	198	Cytoplasmic	Cytoplasmic	Cytoplasmic	Periplasmic	Cytoplasmic	-	-	Unknown function	Enzymes of unknown specificity
161367575	Q8X7E8	NP_288619.2	Z3281	mrp	CY	putative ATPase [Escherichia coli O157:H7 EDL933]	838 / 731 / 349 / 421	39942.33*	0	0	0	0	0	0	0	0	709.24	0	0	0	59.1033	Cytoplasmic Membrane	Cytoplasm	379	Cytoplasmic	X	Cytoplasmic	Cytoplasmic	Cytoplasmic	-	-	Energy metabolism	Electron transport
15802247	Q8XCM1	NP_288271.1	Z2881	(yebT)	IM	putative membrane protein YebT [Escherichia coli O157:H7 EDL933]	839 / - / - / -	95326.0*	0	0	0	106.968	0	138.163	0	460.566	0	0	0	0	58.8081	Unknown	Cytoplasm	879	Unknown	X	Cytoplasmic	Cytoplasmic	Outer Membrane	-	-	Unknown function	General
15802268	Q8XCJ3	NP_288292.1	Z2907	msbB	IM	lipid A biosynthesis (KDO)2-(lauroyl)-lipid IVA acyltransferase [Escherichia coli O157:H7 EDL933]	840 / - / - / -	37374.9	0	0	0	189.223	0	0	0	0	0	507.002	0	0	58.0187	Cytoplasmic Membrane	Inner membrane	323	Inner Membrane	Cytoplasmic	Cytoplasmic	Cytoplasmic	Periplasmic	-	-	Cellular processes	Adaptations to atypical conditions
15801226	Q8X8G5	NP_287243.1	Z1748	ndh	IM	NADH dehydrogenase [Escherichia coli O157:H7 EDL933]	841 / - / - / 1028	47375	0	471.194	0	0	0	0	0	0	0	224.39	0	0	57.9654	Cytoplasmic Membrane	Inner membrane	434	Unknown	Cytoplasmic	Cytoplasmic	Cytoplasmic	Unknown	-	-	Energy metabolism	Aerobic
15802081	Q8X618	NP_288103.1	Z2696	ydhT		uncharacterized protein YdhT [Escherichia coli O157:H7 EDL933]	842 / - / 1421 / -	29340.5	0	688.245	0	0	0	0	0	0	0	0	0	0	57.3537	Unknown	Cytoplasm	270	Extracellular	Cytoplasmic	Cytoplasmic	Cytoplasmic	Cytoplasmic	-	-	Hypothetical proteins	Conserved
15803056	P0ACD6	NP_289086.1	Z3796	iscU	CY, Ht-Mu	NifU-like scaffold protein [Escherichia coli O157:H7 EDL933]	843 / 337 / 152 / 410	13848	0	0	0	0	685.409	0	0	0	0	0	0	0	57.1174	Unknown	Cytoplasm	128	Unknown	Periplasmic	Cytoplasmic	Periplasmic	Cytoplasmic	-	-	Unknown function	General
15802321	Q8XBH9	NP_288347.1	Z2969	_		unknown protein encoded by prophage CP-933T [Escherichia coli O157:H7 EDL933]	844 / - / - / 625	14857.1	0	0	0	0	0	683.651	0	0	0	0	0	0	56.9709	Unknown	Cytoplasm	134	Unknown	Cytoplasmic	Cytoplasmic	Periplasmic	Cytoplasmic	-	-	Mobile and extrachromosomal element functions	Prophage functions
15804002	Q8X6K7	NP_290038.1	Z4864	_		putative beta-hydroxydecanoyl-ACP dehydrase [Escherichia coli O157:H7 EDL933]	845 / - / - / -	16620.3	0	0	0	0	0	0	0	0	0	0	0	682.245	56.8537	Unknown	Cytoplasm	154	Unknown	Periplasmic	Cytoplasmic	Periplasmic	Unknown	-	-	Hypothetical proteins	Conserved
15799765	P65435	NP_285777.1	Z0091	mraZ (yabB)	CY, Ho-8	conserved protein MraZ [Escherichia coli O157:H7 EDL933]	846 / 821 / 828 / 1508	17359.4	0	0	0	0	0	676.912	0	0	0	0	0	0	56.4093	Cytoplasmic	Periplasm	152	Unknown	Cytoplasmic	Cytoplasmic	Cytoplasmic	Cytoplasmic	-	-	Hypothetical proteins	Conserved
15802353	Q8XBC8	NP_288379.1	Z3006	yecS	IM	putative transport system permease protein YecS [Escherichia coli O157:H7 EDL933]	847 / - / - / -	24830.4	0	0	0	676.289	0	0	0	0	0	0	0	0	56.3574	Cytoplasmic Membrane	Inner membrane	222	Inner Membrane	Cytoplasmic	Cytoplasmic	Cytoplasmic	Inner Membrane	-	-	Transport and binding proteins	Amino acids, peptides and amines
15804704	Q8XDU5	NP_290745.1	Z5714	basS	IM	sensor protein BasS/PmrB [Escherichia coli O157:H7 EDL933]	848 / - / - / 1207	40939.7	0	0	0	0	0	0	0	0	0	0	674.739	0	56.2282	Cytoplasmic Membrane	Inner membrane	363	Inner Membrane	Cytoplasmic	Cytoplasmic	Cytoplasmic	Inner Membrane	-	-	Transcription	Transcription factors
15804966	P0A7A3	NP_291008.1	Z5997	gpmB	CY	phosphoglycerate mutase [Escherichia coli O157:H7 EDL933]	849 / - / - / 552	24101.69*	0	0	0	0	0	0	0	0	0	673.899	0	0	56.1583	Cytoplasmic	Cytoplasm	215	Cytoplasmic	X	Cytoplasmic	Cytoplasmic	Cytoplasmic	-	-	Energy metabolism	Glycolysis/gluconeogenesis
15804318	P0AAH2	NP_290357.1	Z5216	pstB	IM, Ht-5	phosphate transporter subunit [Escherichia coli O157:H7 EDL933]	850 / 784 / 1187 / 1287	29026.2	0	0	0	321.809	0	350.312	0	0	0	0	0	0	56.01	Cytoplasmic Membrane	Inner membrane	257	Inner Membrane	Cytoplasmic	Cytoplasmic	Cytoplasmic	Cytoplasmic	-	-	Transport and binding proteins	Anions
15803886	Q8X835	NP_289922.1	Z4736	yhfR		DNA-binding transcriptional regulator FrlR [Escherichia coli O157:H7 EDL933]	851 / - / - / 1141	30244.5	0	0	0	0	0	0	0	0	0	0	666.614	0	55.5512	Unknown	Cytoplasm	243	Cytoplasmic	Cytoplasmic	Cytoplasmic	Cytoplasmic	Cytoplasmic	-	-	Regulatory functions	Other
15799740	Q7AHS5	NP_285752.1	Z0064	djlA	IM	DNA-J like membrane chaperone protein [Escherichia coli O157:H7 EDL933]	852 / - / - / 1303	30564.2	0	0	0	0	0	0	0	0	0	154.916	0	510.208	55.427	Cytoplasmic Membrane	Inner membrane	271	Inner Membrane	Cytoplasmic	Cytoplasmic	Cytoplasmic	Inner Membrane	-	-	Unclassified	Role category not yet assigned
15801224	P58067	NP_287241.1	Z1746	ycfO	CY	beta-hexosaminidase [Escherichia coli O157:H7 EDL933]	853 / 1073 / 601 / -	37603.2	0	0	0	0	0	0	0	0	0	0	0	663.224	55.2687	Cytoplasmic	Cytoplasm	341	Cytoplasmic	Cytoplasmic	Cytoplasmic	Cytoplasmic	Cytoplasmic	-	-	Energy metabolism	Biosynthesis and degradation of polysaccharides
15799829	P0ABS3	NP_285841.1	Z0156	dksA	CY	DnaK transcriptional regulator DksA [Escherichia coli O157:H7 EDL933]	854 / - / 85 / 701	17527.1	0	0	0	0	0	0	0	0	0	659.383	0	0	54.9486	Cytoplasmic	Cytoplasm	151	Cytoplasmic	Cytoplasmic	Cytoplasmic	Cytoplasmic	Cytoplasmic	-	-	Regulatory functions	Other
15799713	P58209	NP_285725.1	Z0036	dapB	CY, Ho-4	dihydrodipicolinate reductase [Escherichia coli O157:H7 EDL933]	855 / 476 / 759 / 1692	28796.5	0	0	0	0	0	0	0	0	0	241.829	0	415.097	54.7439	Cytoplasmic	Cytoplasm	273	Cytoplasmic	Cytoplasmic	Cytoplasmic	Cytoplasmic	Cytoplasmic	-	-	Amino acid biosynthesis	Aspartate family
15803930	Q8X4P4	NP_289966.1	Z4781	glpR	CY	DNA-binding transcriptional repressor GlpR [Escherichia coli O157:H7 EDL933]	856 / - / 1057 / -	28076.9	0	0	0	0	0	0	0	0	0	0	0	644.473	53.7061	Cytoplasmic	Cytoplasm	252	Cytoplasmic	Cytoplasmic	Cytoplasmic	Cytoplasmic	Cytoplasmic	-	-	Energy metabolism	Anaerobic
15804646	Q8X5V1	NP_290687.1	Z5652	tyrB	CY, Ho-2	aromatic amino acid aminotransferase [Escherichia coli O157:H7 EDL933]	857 / 563 / 423 / 1441	43503	0	0	0	374.251	0	0	0	0	0	267.405	0	0	53.4713	Cytoplasmic	Cytoplasm	397	Cytoplasmic	Cytoplasmic	Cytoplasmic	Cytoplasmic	Cytoplasmic	-	-	Amino acid biosynthesis	Aromatic amino acid family
15803901	P58720	NP_289937.1	Z4752	yrfF	IM	putative dehydrogenase [Escherichia coli O157:H7 EDL933]	858 / - / - / 1230	79470.1	0	0	97.8844	0	0	258.99	0	279.184	0	0	0	0	53.0048	Cytoplasmic Membrane	Inner membrane	711	Inner Membrane	Cytoplasmic	Periplasmic	Cytoplasmic	Inner Membrane	-	-	Central intermediary metabolism	Other
15799775	P65471	NP_285787.1	Z0101	murC	CY	UDP-N-acetylmuramate--L-alanine ligase [Escherichia coli O157:H7 EDL933]	859 / 702 / 780 / 289	53595.8	0	258.904	0	0	0	0	0	0	0	376.089	0	0	52.916	Cytoplasmic	Cytoplasm	491	Cytoplasmic	Cytoplasmic	Cytoplasmic	Cytoplasmic	Cytoplasmic	-	-	Cell envelope	Biosynthesis and degradation of murein sacculus and peptidoglycan
15802767	P0AB86	NP_288794.1	Z3472	yojL	L (IM or OM)	thiamine biosynthesis lipoprotein ApbE [Escherichia coli O157:H7 EDL933]	860 / - / - / -	38547.3	0	263.786	0	0	0	0	0	0	0	363.664	0	0	52.2875	Unknown	Outer membrane	351	periplasm	Periplasmic	Periplasmic	Periplasmic	Unknown	-	-	Biosynthesis of cofactors, prosthetic groups, and carriers	Thiamine
15800104	Q8X5H6	NP_286116.1	Z0474	yaiW	L (IM or OM)	uncharacterized protein YaiW [Escherichia coli O157:H7 EDL933]	861 / - / - / -	40415.6	0	208.485	0	0	0	0	0	0	0	0	417.389	0	52.1562	Unknown	Cytoplasm	364	Unknown	Periplasmic	Periplasmic	Periplasmic	Periplasmic	-	-	Cell envelope	Other
15799902	Q8X7V9	NP_285914.1	Z0253	_		hypothetical protein Z0253 [Escherichia coli O157:H7 EDL933]	862 / - / - / 1221	26414	0	0	0	0	0	0	620.136	0	0	0	0	0	51.678	Unknown	Cytoplasm	247	Unknown	Cytoplasmic	Cytoplasmic	Cytoplasmic	Unknown	-	-	Hypothetical proteins	Conserved
15800049	Q8X6A6	NP_286061.1	Z0415	_	PP	putative periplasmic binding protein, substrate ribose [Escherichia coli O157:H7 EDL933]	863 / 1074 / 574 / 1662	35651.8	0	0	0	0	0	0	0	0	406.173	212.158	0	0	51.5275	Unknown	Cytoplasm	328	periplasm	Cytoplasmic	Periplasmic	Cytoplasmic	Periplasmic	-	-	Transport and binding proteins	Carbohydrates, organic alcohols, and acids
15802197	P0ACY5	NP_288219.1	Z2823	yeaG		putative protein kinase [Escherichia coli O157:H7 EDL933]	864 / - / - / 334	74477.5	349.63	0	0	0	0	0	0	0	0	0	267.575	0	51.4338	Cytoplasmic	Cytoplasm	644	Unknown	Cytoplasmic	Cytoplasmic	Cytoplasmic	Cytoplasmic	-	-	Protein synthesis	Ribosomal proteins: synthesis and modification
15803711	P0AFF8	NP_289745.1	Z4530	nusA	CY, Ho-1	transcription elongation factor NusA [Escherichia coli O157:H7 EDL933]	865 / 88 / 653 / 253	54868.7	262.22	0	0	354.237	0	0	0	0	0	0	0	0	51.3714	Cytoplasmic	Cytoplasm	495	Cytoplasmic	Cytoplasmic	Cytoplasmic	Cytoplasmic	Cytoplasmic	-	-	Transcription	Transcription factors
15802656	Q8X3K6	NP_288683.1	Z3355	_		putative DNA replication protein P of prophage CP-933V [Escherichia coli O157:H7 EDL933]	866 / - / - / 1658	26541.67*	230.211	0	381.519	0	0	0	0	0	0	0	0	0	50.9775	Unknown	Periplasm	233	Cytoplasmic	X	Cytoplasmic	Periplasmic	Cytoplasmic	-	-	Mobile and extrachromosomal element functions	Prophage functions
15802472	Q8X8V0	NP_288498.1	Z3151	cobT	CY, Ho-2	nicotinate-nucleotide-dimethylbenzimidazole phosphoribosyltransferase [Escherichia coli O157:H7 EDL933]	867 / - / - / -	37019.18*	606.925	0	0	0	0	0	0	0	0	0	0	0	50.5771	Cytoplasmic	Cytoplasm	359	Cytoplasmic	X	Cytoplasmic	Cytoplasmic	Cytoplasmic	-	-	Purines, pyrimidines, nucleosides, and nucleotides	Salvage of nucleosides and nucleotides
15802748	P0AA87	NP_288775.1	Z3452	dsbE	IM	disulfide oxidoreductase in biogenesis of cytochrome c [Escherichia coli O157:H7 EDL933]	868 / - / - / -	20808.3	0	0	0	0	0	0	0	0	0	605.576	0	0	50.4647	Cytoplasmic Membrane	Inner membrane	185	Inner Membrane	Periplasmic	Periplasmic	Cytoplasmic	Periplasmic	-	-	Protein fate	Protein folding and stabilization
15803113	Q8X9F5	NP_289144.1	Z3870	pssA	CY/IM	phosphatidylserine synthase [Escherichia coli O157:H7 EDL933]	869 / 979 / - / 724	52931.1	245.073	183.19	0	0	0	0	0	0	0	177.224	0	0	50.4573	Cytoplasmic	Cytoplasm	452	Unknown	Cytoplasmic	Cytoplasmic	Cytoplasmic	Cytoplasmic	-	-	Fatty acid and phospholipid metabolism	Biosynthesis
15800061	Q8X694	NP_286073.1	Z0428	prpC	CY, Ho-2	methylcitrate synthase [Escherichia coli O157:H7 EDL933]	870 / - / - / -	43105.4	188.811	0	0	150.127	0	0	0	0	0	264.456	0	0	50.2828	Cytoplasmic	Cytoplasm	389	Unknown	Cytoplasmic	Cytoplasmic	Cytoplasmic	Cytoplasmic	-	-	Energy metabolism	Electron transport
15804919	Q8X485	NP_290961.1	Z5945	symE	CY	endoribonuclease SymE [Escherichia coli O157:H7 EDL933]	871 / - / 764 / -	12293.6	0	0	0	0	0	600.426	0	0	0	0	0	0	50.0355	Unknown	Cytoplasm	113	Unknown	Periplasmic	Cytoplasmic	Periplasmic	Cytoplasmic	-	-	Hypothetical proteins	Conserved
15804682	Q8X5Q4	NP_290723.1	Z5691	_	IM	putative ATP-binding protein of ribose ABC transport system [Escherichia coli O157:H7 EDL933]	872 / 1049 / - / -	56370.79*	0	0	0	0	385.017	0	0	0	0	0	0	210.175	49.5993	Cytoplasmic Membrane	Inner membrane	506	Inner Membrane	X	Cytoplasmic	Cytoplasmic	Cytoplasmic	-	-	Transport and binding proteins	Unknown substrate
15802876	P63610	NP_288903.1	Z3592	aroC	CY, Ho-4	chorismate synthase [Escherichia coli O157:H7 EDL933]	873 / 529 / 1073 / 982	39149.9	0	0	0	0	0	0	0	0	0	0	592.849	0	49.4041	Cytoplasmic	Cytoplasm	361	Cytoplasmic	Cytoplasmic	Cytoplasmic	Cytoplasmic	Cytoplasmic	-	-	Amino acid biosynthesis	Aromatic amino acid family
15804626	Q7A937	NP_290667.1	Z5631	malF	IM	maltose transporter membrane protein [Escherichia coli O157:H7 EDL933]	874 / - / - / -	57082.19*	0	0	0	0	0	0	0	592.237	0	0	0	0	49.3531	Cytoplasmic Membrane	Inner membrane	514	Inner Membrane	X	Cytoplasmic	Cytoplasmic	Inner Membrane	-	-	Transport and binding proteins	Carbohydrates, organic alcohols, and acids
15800680	Q8X4X5	NP_286694.1	Z1159	_		unknown in ISEc8 [Escherichia coli O157:H7 EDL933]	875 / - / - / -	15883.38*	0	0	0	0	0	589.698	0	0	0	0	0	0	49.1415	Unknown	Cytoplasm	141	Unknown	X	Cytoplasmic	Periplasmic	Cytoplasmic	-	-	Mobile and extrachromosomal element functions	Transposon functions
15801398	Q8XDN0	NP_287415.1	Z1938	minC	CY/IM, Ht-Mu, divisome	septum formation inhibitor [Escherichia coli O157:H7 EDL933]	876 / 724 / 827 / 444	24744.5	0	0	183.033	0	0	398.666	0	0	0	0	0	0	48.475	Cytoplasmic	Inner membrane	231	Unknown	Cytoplasmic	Cytoplasmic	Cytoplasmic	Cytoplasmic	-	-	Cellular processes	Cell division
15801196	P0A6S1	NP_287213.1	Z1717	flgH	L-OM	flagellar basal body outer membrane L-ring protein [Escherichia coli O157:H7 EDL933]	877 / - / 1146 / -	24614.5	0	0	0	0	0	0	580.387	0	0	0	0	0	48.3656	Outer Membrane	Inner membrane	232	Outer Membrane	Periplasmic	Extracellular	Periplasmic	Outer Membrane	-	-	Cellular processes	Chemotaxis and motility
15802813	Q8XDY1	NP_288840.1	Z3522	menB	CY, Ho-6	naphthoate synthase [Escherichia coli O157:H7 EDL933]	878 / 129 / 895 / 633	31621.15*	580.177	0	0	0	0	0	0	0	0	0	0	0	48.3481	Cytoplasmic	Cytoplasm	285	Unknown	X	Cytoplasmic	Cytoplasmic	Cytoplasmic	-	-	Biosynthesis of cofactors, prosthetic groups, and carriers	Menaquinone and ubiquinone
15799934	Q8X7Q3	NP_285946.1	Z0290	fhiA	IM	flagellar biosynthesis [Escherichia coli O157:H7 EDL933]	879 / - / 906 / 1833	63155.8	0	0	0	0	0	0	0	0	0	0	572.312	0	47.6927	Cytoplasmic Membrane	Inner membrane	579	Inner Membrane	Cytoplasmic	Cytoplasmic	Cytoplasmic	Inner Membrane	-	Type III secretion system	Cell envelope	Surface structures
15804309	Q8XB22	NP_290348.1	Z5207	yieE	CY	predicted phosphopantetheinyl transferase [Escherichia coli O157:H7 EDL933]	880 / - / - / 1548	28208.3	0	0	0	0	0	0	0	0	0	0	571.611	0	47.6343	Unknown	Cytoplasm	253	Cytoplasmic	Cytoplasmic	Cytoplasmic	Cytoplasmic	Cytoplasmic	-	-	Hypothetical proteins	Conserved
15802541	P0AAB3	NP_288567.1	Z3226	wzb		tyrosine phosphatase [Escherichia coli O157:H7 EDL933]	881 / - / - / -	16708.7	0	0	0	0	0	0	0	0	0	0	0	570.86	47.5717	Cytoplasmic	Extracellular	147	Unknown	Cytoplasmic	Cytoplasmic	Cytoplasmic	Cytoplasmic	-	-	Unknown function	Enzymes of unknown specificity
15803001	P63944	NP_289031.1	Z3737	dapA	CY, Ho-4	dihydrodipicolinate synthase [Escherichia coli O157:H7 EDL933]	882 / 71 / 305 / 777	31348.38*	0	198.654	0	0	0	0	0	0	0	0	0	371.008	47.4719	Cytoplasmic	Cytoplasm	292	Cytoplasmic	X	Cytoplasmic	Cytoplasmic	Cytoplasmic	-	-	Amino acid biosynthesis	Aspartate family
15804401	Q8X8P6	NP_290441.1	Z5329	yigB	CY	flavin mononucleotide phosphatase [Escherichia coli O157:H7 EDL933]	883 / - / 1292 / 192	27124.54*	0	0	0	0	0	0	569.276	0	0	0	0	0	47.4397	Cytoplasmic	Cytoplasm	238	Unknown	X	Cytoplasmic	Cytoplasmic	Cytoplasmic	-	-	Central intermediary metabolism	Other
15804170	Q8XDC0	NP_290209.1	Z5053	rfaI (waaI)	L (IM or OM)	putative LPS biosynthesis enzyme [Escherichia coli O157:H7 EDL933]	884 / - / - / 713	39414.4	0	0	0	0	0	0	0	0	0	568.513	0	0	47.376	Unknown	Cytoplasm	335	Cytoplasmic	Cytoplasmic	Cytoplasmic	Cytoplasmic	Cytoplasmic	-	-	Cell envelope	Biosynthesis and degradation of surface polysaccharides and lipopolysaccharides
15799683	Q8XA82	NP_285695.1	Z0003	thrB	CY, Ho-2	homoserine kinase [Escherichia coli O157:H7 EDL933]	885 / - / 1169 / 654	33624.3	564.108	0	0	0	0	0	0	0	0	0	0	0	47.009	Cytoplasmic	Cytoplasm	310	Cytoplasmic	Cytoplasmic	Cytoplasmic	Cytoplasmic	Cytoplasmic	-	-	Amino acid biosynthesis	Aspartate family
15801594	Q8X505	NP_287611.1	Z2158	ydfG	CY	3-hydroxy acid dehydrogenase [Escherichia coli O157:H7 EDL933]	886 / 396 / 291 / 1115	27262	0	0	0	0	0	0	0	0	0	0	563.329	0	46.9441	Cytoplasmic	Cytoplasm	248	Cytoplasmic	Cytoplasmic	Cytoplasmic	Cytoplasmic	Cytoplasmic	-	-	Energy metabolism	Fermentation
15802225	Q8XEI3	NP_288248.1	Z2855	pabB	CY, Ho-2, Ho-4	para-aminobenzoate synthase component I [Escherichia coli O157:H7 EDL933]	887 / 808 / 874 / 899	51013.6*	0	0	0	0	0	561.488	0	0	0	0	0	0	46.7907	Cytoplasmic	Cytoplasm	453	Cytoplasmic	X	Cytoplasmic	Cytoplasmic	Cytoplasmic	-	-	Biosynthesis of cofactors, prosthetic groups, and carriers	Folic acid
15804521	Q8X791	NP_290561.1	Z5477	menA	IM	1,4-dihydroxy-2-naphthoate octaprenyltransferase [Escherichia coli O157:H7 EDL933]	888 / - / - / -	33578.8	0	0	0	559.558	0	0	0	0	0	0	0	0	46.6298	Cytoplasmic Membrane	Inner membrane	308	Inner Membrane	Cytoplasmic	Cytoplasmic	Cytoplasmic	Inner Membrane	-	-	Biosynthesis of cofactors, prosthetic groups, and carriers	Menaquinone and ubiquinone
15802750	P69492	NP_288777.1	Z3454	ccmE	IM	cytochrome c-type biogenesis protein CcmE [Escherichia coli O157:H7 EDL933]	889 / - / - / -	17697.7	0	558.967	0	0	0	0	0	0	0	0	0	0	46.5806	Cytoplasmic	Inner membrane	159	Inner Membrane	Cytoplasmic	Cytoplasmic	Cytoplasmic	Periplasmic	-	-	Energy metabolism	Electron transport
15801909	Q8X7C2	NP_287929.1	Z2540	btuR	CY	cob(I)yrinic acid a,c-diamide adenosyltransferase [Escherichia coli O157:H7 EDL933]	890 / - / 1179 / 481	22026.1	0	0	0	0	0	0	0	0	0	0	0	549.958	45.8299	Cytoplasmic	Cytoplasm	196	Cytoplasmic	Cytoplasmic	Cytoplasmic	Cytoplasmic	Cytoplasmic	-	-	Biosynthesis of cofactors, prosthetic groups, and carriers	Heme, porphyrin, and cobalamin
15800626	Q8X6M0	NP_286640.1	Z1102	_		putative nucleotide di-P-sugar epimerase or dehydratase [Escherichia coli O157:H7 EDL933]	891 / - / - / 1163	39654.67*	400.024	0	0	0	0	0	0	0	0	0	0	149.79	45.8178	Cytoplasmic	Cytoplasm	349	Unknown	X	Cytoplasmic	Cytoplasmic	Cytoplasmic	-	-	Hypothetical proteins	Conserved
15802241	Q8XCN4	NP_288264.1	Z2874	(kdgR)	CY, Ho-2	DNA-binding transcriptional repressor KdgR [Escherichia coli O157:H7 EDL933]	892 / 254 / 287 / 1098	30027.74*	0	0	0	0	0	301.851	0	0	247.56	0	0	0	45.7842	Cytoplasmic	Cytoplasm	263	Cytoplasmic	X	Cytoplasmic	Cytoplasmic	Cytoplasmic	-	-	Regulatory functions	Other
161367659	Q8X9Z9	NP_285769.2	Z0082	leuB	CY, Ho-2	3-isopropylmalate dehydrogenase [Escherichia coli O157:H7 EDL933]	893 / 722 / - / -	39513.4	0	548.758	0	0	0	0	0	0	0	0	0	0	45.7299	Cytoplasmic	Cytoplasm	363	Cytoplasmic	Cytoplasmic	Cytoplasmic	Cytoplasmic	Cytoplasmic	-	-	Amino acid biosynthesis	Pyruvate family
15802864	P0ABP7	NP_288891.1	Z3579	dedA	IM	conserved inner membrane protein DedA [Escherichia coli O157:H7 EDL933]	894 / - / - / -	24557.23*	0	0	0	0	0	548.244	0	0	0	0	0	0	45.687	Cytoplasmic Membrane	Inner membrane	219	Inner Membrane	X	Cytoplasmic	Cytoplasmic	Inner Membrane	-	-	Unknown function	General
15803903	P0ACH0	NP_289939.1	Z4754	hslR (yrfH)	CY, 50S Rib	ribosome-associated heat shock protein Hsp15 [Escherichia coli O157:H7 EDL933]	895 / - / - / -	15495.2	0	0	0	0	546.583	0	0	0	0	0	0	0	45.5486	Cytoplasmic	Cytoplasm	133	Cytoplasmic	Cytoplasmic	Cytoplasmic	Cytoplasmic	Cytoplasmic	-	-	Protein synthesis	Other
15804751	Q8XDP6	NP_290792.1	Z5765	yjeP	IM	predicted mechanosensitive channel YjeP [Escherichia coli O157:H7 EDL933]	896 / - / - / 1865	123964	0	124.306	0	114.529	0	143.642	0	154.195	0	0	0	0	44.7227	Cytoplasmic Membrane	Outer membrane	1107	Inner Membrane	Cytoplasmic	Cytoplasmic	Cytoplasmic	Inner Membrane	-	-	Transport and binding proteins	Amino acids, peptides and amines
15804992	Q8XAW1	NP_290395.1	Z5275m	hdfR (yifA)	CY	transcriptional regulator HdfR [Escherichia coli O157:H7 EDL933]	897 / 879 / - / 1073	31775.1	0	0	0	0	0	0	0	0	0	0	0	535.875	44.6563	Cytoplasmic	Cytoplasm	279	Cytoplasmic	Cytoplasmic	Cytoplasmic	Cytoplasmic	Cytoplasmic	-	-	No Data	No Data
161367498	P58220	NP_290138.2	Z4978	ghrB (yiaE)	CY, Ho-2	glyoxylate reductase / glyoxylate reductase B / 2-ketoaldonate reductase [Escherichia coli O157:H7 EDL933]	898 / 170 / 458 / 207	35395.1	534.176	0	0	0	0	0	0	0	0	0	0	0	44.5147	Cytoplasmic	Cytoplasm	324	Cytoplasmic	Cytoplasmic	Cytoplasmic	Cytoplasmic	Cytoplasmic	-	-	Central intermediary metabolism	Other
15802030	Q8X674	NP_288051.1	Z2619	_	bb-OM	predicted outer membrane porin for glucuronide transport [Escherichia coli O157:H7 EDL933]	899 / - / - / -	37682.9	0	0	0	0	0	0	0	0	0	0	532.067	0	44.339	Outer Membrane	Outer membrane	342	Unknown	Extracellular	Periplasmic	Extracellular	Extracellular	-	-	Cell envelope	Other
15803120	P0AD51	NP_289151.1	Z3890	yfiA	CY	translation inhibitor protein RaiA [Escherichia coli O157:H7 EDL933]	900 / 615 / 16 / 478	12784.1	0	0	0	0	0	0	0	528.754	0	0	0	0	44.0628	Cytoplasmic	Cytoplasm	113	Unknown	Cytoplasmic	Cytoplasmic	Cytoplasmic	Cytoplasmic	-	-	Protein synthesis	Translation factors
15800370	Q8XBK2	NP_286382.1	Z0806	lnt	IM	apolipoprotein N-acyltransferase [Escherichia coli O157:H7 EDL933]	901 / - / - / -	57091.8	0	0	0	0	0	0	0	528.739	0	0	0	0	44.0616	Cytoplasmic Membrane	Inner membrane	512	Inner Membrane	Periplasmic	Cytoplasmic	Cytoplasmic	Inner Membrane	-	-	Transport and binding proteins	Cations and iron carrying compounds
15803326	P0AEP0	NP_289359.1	Z4121	fucU	CY, Ho-6	L-fucose mutarotase [Escherichia coli O157:H7 EDL933]	902 / 272 / 877 / 1102	15472.5	527.173	0	0	0	0	0	0	0	0	0	0	0	43.9311	Cytoplasmic	Cytoplasm	140	Inner Membrane	Cytoplasmic	Cytoplasmic	Cytoplasmic	Cytoplasmic	-	-	Transport and binding proteins	Carbohydrates, organic alcohols, and acids
15803562	Q8XBS5	NP_289595.1	Z4372	plsC	IM	1-acyl-sn-glycerol-3-phosphate acyltransferase [Escherichia coli O157:H7 EDL933]	903 / - / - / 620	27422.2	0	0	0	0	0	0	0	0	0	524.514	0	0	43.7095	Cytoplasmic Membrane	Inner membrane	245	Inner Membrane	Cytoplasmic	Cytoplasmic	Cytoplasmic	Inner Membrane	-	-	Fatty acid and phospholipid metabolism	Biosynthesis
15800107	P0A6J9	NP_286119.1	Z0477	ddl	CY	D-alanyl-alanine synthetase A [Escherichia coli O157:H7 EDL933]	904 / 782 / 342 / 204	39314.3	0	0	0	0	0	0	522.647	0	0	0	0	0	43.5539	Cytoplasmic	Cytoplasm	364	Cytoplasmic	Cytoplasmic	Cytoplasmic	Cytoplasmic	Cytoplasmic	-	-	Cell envelope	Biosynthesis and degradation of murein sacculus and peptidoglycan
15801662	Q8XAS3	NP_287680.1	Z2235	fdnH	IM	formate dehydrogenase-N, nitrate-inducible, iron-sulfur beta subunit [Escherichia coli O157:H7 EDL933]	905 / - / - / -	32210.5	0	0	0	0	0	0	0	0	0	0	518.992	0	43.2493	Cytoplasmic Membrane	Inner membrane	294	Inner Membrane	Cytoplasmic	Cytoplasmic	Cytoplasmic	Cytoplasmic	-	-	Energy metabolism	Anaerobic
15802704	Q8X642	NP_288731.1	Z3403	mglC	IM, Ht-5	beta-methylgalactoside transporter inner membrane component [Escherichia coli O157:H7 EDL933]	906 / - / - / -	35509.7*	0	0	0	507.022	0	0	0	0	0	0	0	0	42.2518	Cytoplasmic Membrane	Inner membrane	336	Inner Membrane	X	Cytoplasmic	Cytoplasmic	Inner Membrane	-	-	Transport and binding proteins	Carbohydrates, organic alcohols, and acids
15803038	P62622	NP_289068.1	Z3778	ispG	CY	4-hydroxy-3-methylbut-2-en-1-yl diphosphate synthase [Escherichia coli O157:H7 EDL933]	907 / 1095 / 1355 / 210	40682.1	0	0	95.7019	0	0	409.926	0	0	0	0	0	0	42.1357	Cytoplasmic	Cytoplasm	372	Unknown	Cytoplasmic	Cytoplasmic	Cytoplasmic	Cytoplasmic	-	-	Biosynthesis of cofactors, prosthetic groups, and carriers	Other
161367467	Q8X5Z9	NP_290645.2	Z5609	iclR	CY	transcriptional repressor IclR [Escherichia coli O157:H7 EDL933]	908 / - / 1032 / 1285	29738.2	0	0	0	0	0	0	0	502.545	0	0	0	0	41.8788	Unknown	Cytoplasm	287	Cytoplasmic	Cytoplasmic	Cytoplasmic	Cytoplasmic	Cytoplasmic	-	-	Energy metabolism	TCA cycle
15800983	A7UQW0	NP_286999.1	Z1489	lomW	bb-OM	putative outer membrane protein Lom precursor of bacteriophage BP-933W [Escherichia coli O157:H7 EDL933]	909 / - / - / -	26570.5	0	0	501.628	0	0	0	0	0	0	0	0	0	41.8023	Outer Membrane	Extracellular	244	Outer Membrane	Extracellular	Extracellular	Extracellular	Outer Membrane	-	-	Mobile and extrachromosomal element functions	Prophage functions
15803723	Q8X9K7	NP_289757.1	Z4545	obgE	CY	GTPase ObgE [Escherichia coli O157:H7 EDL933]	910 / 714 / 1443 / 642	43254.1	0	0	0	0	0	0	0	0	494.944	0	0	0	41.2454	Cytoplasmic	Cytoplasm	390	Cytoplasmic	Cytoplasmic	Cytoplasmic	Cytoplasmic	Cytoplasmic	-	-	Unknown function	General
15803975	P0A9R9	NP_290011.1	Z4837	ftsE	CY/IM, Ht-Mu, divisome	cell division protein FtsE [Escherichia coli O157:H7 EDL933]	911 / - / - / 269	24438.4	0	0	0	0	0	0	0	0	0	0	0	491.284	40.9403	Cytoplasmic Membrane	Cytoplasm	222	Inner Membrane	Cytoplasmic	Cytoplasmic	Cytoplasmic	Cytoplasmic	-	-	Cellular processes	Cell division
15800035	Q8X6C3	NP_286047.1	Z0400	betI	CY	transcriptional regulator BetI [Escherichia coli O157:H7 EDL933]	912 / - / 1168 / -	21798.2	0	0	0	0	0	0	0	489.955	0	0	0	0	40.8296	Unknown	Cytoplasm	195	Cytoplasmic	Periplasmic	Cytoplasmic	Cytoplasmic	Cytoplasmic	-	-	Cellular processes	Other
15801835	P0AAC2	NP_287853.1	Z2435	uspA (ydaA)	CY	universal stress protein UspE [Escherichia coli O157:H7 EDL933]	913 / 233 / 136 / 240	35705.6	0	0	0	0	0	0	0	0	0	489.904	0	0	40.8253	Cytoplasmic	Cytoplasm	316	Cytoplasmic	Cytoplasmic	Cytoplasmic	Cytoplasmic	Cytoplasmic	-	-	Unknown function	General
15804363	Q8X467	NP_290403.1	Z5283	ilvA	CY, Ho-4	threonine dehydratase [Escherichia coli O157:H7 EDL933]	914 / 804 / 1396 / 1053	56345.88*	0	0	0	149.319	0	0	0	132.259	0	0	0	200.479	40.1714	Cytoplasmic	Cytoplasm	515	Cytoplasmic	X	Cytoplasmic	Cytoplasmic	Cytoplasmic	-	-	Amino acid biosynthesis	Pyruvate family
15801429	Q8XDH5	NP_287446.1	Z1970	dhaL	CY/IM, Ht-5	dihydroxyacetone kinase ADP-binding subunit [Escherichia coli O157:H7 EDL933]	915 / - / - / 774	22706	0	0	0	0	0	0	0	0	0	481.397	0	0	40.1164	Cytoplasmic	Cytoplasm	210	Unknown	Cytoplasmic	Cytoplasmic	Cytoplasmic	Cytoplasmic	-	-	Unclassified	Role category not yet assigned
15804878	Q8XC73	NP_290919.1	Z5899	_		putative ATP-dependent helicase [Escherichia coli O157:H7 EDL933]	916 / 756 / 1367 / 661	108881	0	0	0	0	0	0	0	0	0	89.3568	384.131	0	39.4574	Cytoplasmic Membrane	Cytoplasm	952	Cytoplasmic	Cytoplasmic	Cytoplasmic	Cytoplasmic	Cytoplasmic	-	-	Transcription	Transcription factors
15803385	Q8X6F9	NP_289418.1	Z4185	spaS	IM	type III secretion protein SpaS for surface presentation of antigens [Escherichia coli O157:H7 EDL933]	917 / - / - / -	43341.3	0	0	0	0	0	0	470.281	0	0	0	0	0	39.1901	Cytoplasmic Membrane	Inner membrane	373	Inner Membrane	Cytoplasmic	Cytoplasmic	Cytoplasmic	Inner Membrane	-	Type III secretion system	Protein fate	Protein and peptide secretion and trafficking
15800395	Q8X9G2	NP_286407.1	Z0841	kdpE	CY	DNA-binding transcriptional activator KdpE [Escherichia coli O157:H7 EDL933]	918 / 681 / 992 / -	25278.1	0	0	0	0	0	0	0	468.955	0	0	0	0	39.0795	Cytoplasmic	Cytoplasm	225	Cytoplasmic	Cytoplasmic	Cytoplasmic	Cytoplasmic	Cytoplasmic	-	-	Regulatory functions	Other
15802271	P0A9X3	NP_288295.1	Z2910	znuC	IM	high-affinity zinc transporter ATPase [Escherichia coli O157:H7 EDL933]	919 / - / - / -	27886.32*	0	0	0	0	0	464.498	0	0	0	0	0	0	38.7082	Cytoplasmic Membrane	Inner membrane	251	Unknown	X	Cytoplasmic	Cytoplasmic	Unknown	-	-	Transport and binding proteins	Unknown substrate
15802930	P0A6V9	NP_288958.1	Z3654	glk	CY	glucokinase [Escherichia coli O157:H7 EDL933]	920 / 827 / 731 / 343	34721.8	0	461.279	0	0	0	0	0	0	0	0	0	0	38.4399	Cytoplasmic	Cytoplasm	321	Cytoplasmic	Cytoplasmic	Cytoplasmic	Cytoplasmic	Cytoplasmic	-	-	Energy metabolism	Glycolysis/gluconeogenesis
15800458	Q8X964	NP_286470.1	Z0910	ybgF	PP, Ht-7	hypothetical protein Z0910 [Escherichia coli O157:H7 EDL933]	921 / 152 / 498 / 1244	28243.2	0	0	0	0	0	0	457.496	0	0	0	0	0	38.1247	Periplasmic	Outer membrane	263	Unknown	Periplasmic	Periplasmic	Periplasmic	Extracellular	-	-	Hypothetical proteins	Conserved
15804556	Q8X730	NP_290597.1	Z5518	argH	CY	argininosuccinate lyase [Escherichia coli O157:H7 EDL933]	922 / 645 / - / -	50311.4	0	0	0	0	0	0	453.73	0	0	0	0	0	37.8108	Cytoplasmic	Cytoplasm	457	Cytoplasmic	Cytoplasmic	Cytoplasmic	Cytoplasmic	Cytoplasmic	-	-	Amino acid biosynthesis	Glutamate family
15804149	Q8XDF7	NP_290188.1	Z5032	lldD	CY	L-lactate dehydrogenase [Escherichia coli O157:H7 EDL933]	923 / 1056 / - / 1263	42756.4	0	0	0	0	0	243.303	208.249	0	0	0	0	0	37.6294	Unknown	Cytoplasm	396	Cytoplasmic	Cytoplasmic	Cytoplasmic	Cytoplasmic	Cytoplasmic	-	-	Energy metabolism	Aerobic
15801383	Q8X588	NP_287400.1	Z1923	_		uncharacterized protein Z1923 [Escherichia coli O157:H7 EDL933]	924 / - / 625 / -	18716.5	448.395	0	0	0	0	0	0	0	0	0	0	0	37.3663	Cytoplasmic	Cytoplasm	168	Unknown	Cytoplasmic	Cytoplasmic	Cytoplasmic	Cytoplasmic	-	-	Hypothetical proteins	Conserved
15801185	Q8X8M8	NP_287202.1	Z1705	mviM		putative virulence factor [Escherichia coli O157:H7 EDL933]	925 / 961 / - / -	33717.3	0	0	0	0	0	0	0	0	0	448.088	0	0	37.3407	Unknown	Cytoplasm	307	Unknown	Cytoplasmic	Cytoplasmic	Cytoplasmic	Outer Membrane	-	-	Cellular processes	Pathogenesis
15804165	Q8XDD3	NP_290204.1	Z5048	rfaC	CY	ADP-heptose:LPS heptosyl transferase I [Escherichia coli O157:H7 EDL933]	926 / - / - / -	36852.7	0	0	0	204.973	0	0	0	240.923	0	0	0	0	37.158	Cytoplasmic	Cytoplasm	330	Unknown	Cytoplasmic	Cytoplasmic	Cytoplasmic	Unknown	-	-	Cell envelope	Biosynthesis and degradation of surface polysaccharides and lipopolysaccharides
15803942	P0A9R0	NP_289978.1	Z4797	asd	CY, Ho-2	aspartate-semialdehyde dehydrogenase [Escherichia coli O157:H7 EDL933]	927 / 84 / 376 / 698	40016.4	0	0	0	0	0	0	0	0	0	445.522	0	0	37.1268	Cytoplasmic	Cytoplasm	367	Cytoplasmic	Cytoplasmic	Cytoplasmic	Cytoplasmic	Cytoplasmic	-	-	Amino acid biosynthesis	Aspartate family
15799999	Q8X6I1	NP_286011.1	Z0361	ykgK	CY	putative regulator [Escherichia coli O157:H7 EDL933]	928 / - / - / 1547	23298.9	0	0	0	0	0	442.283	0	0	0	0	0	0	36.8569	Cytoplasmic	Cytoplasm	196	Cytoplasmic	Cytoplasmic	Cytoplasmic	Cytoplasmic	Cytoplasmic	-	-	Energy metabolism	Electron transport
15804000	Q8X6L1	NP_290036.1	Z4862	_	L (IM or OM)	predicted lipoprotein Z4862 [Escherichia coli O157:H7 EDL933]	929 / 941 / - / -	21410.9	0	0	0	0	0	0	0	0	0	438.242	0	0	36.5202	Cytoplasmic Membrane	Inner membrane	194	Unknown	Periplasmic	Periplasmic	Periplasmic	Periplasmic	-	-	Cell envelope	Other
161367653	P0ABF3	NP_285839.2	Z0154	pcnB	CY	poly(A) polymerase I [Escherichia coli O157:H7 EDL933]	930 / 1179 / - / 1261	54701.56*	0	0	0	0	0	0	0	0	221.904	0	0	211.631	36.1279	Cytoplasmic	Cytoplasm	465	Cytoplasmic	X	Cytoplasmic	Cytoplasmic	Cytoplasmic	-	-	Transcription	RNA processing
15802227	Q8X5D2	NP_288250.1	Z2857	sdaA	CY	L-serine dehydratase 1 [Escherichia coli O157:H7 EDL933]	931 / 728 / 921 / 137	48984.3*	430.457	0	0	0	0	0	0	0	0	0	0	0	35.8714	Cytoplasmic	Cytoplasm	454	Unknown	X	Cytoplasmic	Cytoplasmic	Cytoplasmic	-	-	Energy metabolism	Amino acids and amines
161367562	Q8XCV1	NP_288868.2	Z3555	yfbU		conserved protein YfbU [Escherichia coli O157:H7 EDL933]	932 / 46 / 657 / 901	19535.5	0	0	0	0	0	0	427.572	0	0	0	0	0	35.631	Cytoplasmic	Periplasm	164	Unknown	Cytoplasmic	Cytoplasmic	Cytoplasmic	Cytoplasmic	-	-	Unknown function	General
15803705	P0AFB3	NP_289739.1	Z4524	nlpI (yhbM)	L (IM or OM)	lipoprotein involved in cell division [Escherichia coli O157:H7 EDL933]	933 / - / - / -	33619.5	0	0	0	0	0	0	0	0	0	424.396	0	0	35.3663	Cytoplasmic Membrane	Inner membrane	294	Extracellular	Cytoplasmic	Cytoplasmic	Cytoplasmic	Periplasmic	-	-	Unknown function	General
15803760	Q8X4W4	NP_289794.1	Z4584	yhcK	CY	transcriptional regulator NanR [Escherichia coli O157:H7 EDL933]	934 / 919 / 1072 / 630	29482.37*	0	0	0	0	0	0	0	0	0	423.416	0	0	35.2847	Cytoplasmic	Cytoplasm	263	Cytoplasmic	X	Cytoplasmic	Cytoplasmic	Cytoplasmic	-	-	Regulatory functions	Other
15800133	P0A849	NP_286145.1	Z0505	tgt	CY, Ho-3	queuine tRNA-ribosyltransferase [Escherichia coli O157:H7 EDL933]	935 / 813 / - / 816	42592.1	0	0	0	0	0	0	0	0	0	421.805	0	0	35.1504	Cytoplasmic	Cytoplasm	375	Unknown	Cytoplasmic	Cytoplasmic	Cytoplasmic	Cytoplasmic	-	-	Protein synthesis	tRNA and rRNA base modification
15802343	Q8XBE2	NP_288369.1	Z2991	_		putative tail sheath protein of prophage CP-933T [Escherichia coli O157:H7 EDL933]	936 / 986 / - / -	43505.4	0	0	0	0	0	420.723	0	0	0	0	0	0	35.0603	Cytoplasmic	Cytoplasm	394	Unknown	Cytoplasmic	Cytoplasmic	Cytoplasmic	Cytoplasmic	-	-	Mobile and extrachromosomal element functions	Prophage functions
15800220	Q8XD11	NP_286232.1	Z0635	siiDA	IM	RtxD protein of type I secretion system [Escherichia coli O157:H7 EDL933]	937 / - / - / -	43627.1	0	0	0	0	412.994	0	0	0	0	0	0	0	34.4162	Cytoplasmic Membrane	Inner membrane	391	Inner Membrane	Cytoplasmic	Cytoplasmic	Cytoplasmic	Unknown	-	-	Protein fate	Protein and peptide secretion and trafficking
15800019	Q8X6F3	NP_286031.1	Z0382	ykgD	CY	putative ARAC-type regulatory protein [Escherichia coli O157:H7 EDL933]	938 / - / 1253 / 1350	31489.2	0	0	0	411.821	0	0	0	0	0	0	0	0	34.3184	Unknown	Cytoplasm	284	Cytoplasmic	Cytoplasmic	Cytoplasmic	Cytoplasmic	Cytoplasmic	-	-	Regulatory functions	Other
161367449	P0AGC4	NP_291005.2	Z5994	slt	L (IM or OM)	lytic murein transglycosylase [Escherichia coli O157:H7 EDL933]	939 / 966 / 937 / 1780	73350.2	0	0	337.321	0	0	69.9207	0	0	0	0	0	0	33.9368	Periplasmic	Periplasm	645	Extracellular	Periplasmic	Periplasmic	Periplasmic	Periplasmic	-	-	Cell envelope	Biosynthesis and degradation of murein sacculus and peptidoglycan
15802759	Q8XE47	NP_288786.1	Z3463	napA	PP	nitrate reductase [Escherichia coli O157:H7 EDL933]	940 / 603 / 849 / 1326	93073.09*	0	0	0	59.8877	0	0	107.546	0	0	0	239.432	0	33.9055	Periplasmic	Periplasm	828	periplasm	X	Periplasmic	Periplasmic	Periplasmic	-	-	Transport and binding proteins	Amino acids, peptides and amines
15800753	Q8X5H9	NP_286767.1	Z1235	ftsK	IM, Ht-3, divisome	DNA translocase FtsK [Escherichia coli O157:H7 EDL933]	941 / 905 / 1399 / 1852	148153.93*	0	0	0	0	0	178.256	227.999	0	0	0	0	0	33.8545	Cytoplasmic Membrane	Nucleoid	1342	Cytoplasmic	X	Cytoplasmic	Periplasmic	Inner Membrane	-	-	Cellular processes	Cell division
15800766	Q8XEA9	NP_286780.1	Z1251	ycaO	CY	conserved protein YcaO [Escherichia coli O157:H7 EDL933]	942 / 625 / - / 1672	66054.5	150.771	0	0	0	0	103.186	150.35	0	0	0	0	0	33.6923	Cytoplasmic	Cytoplasm	589	Unknown	Cytoplasmic	Cytoplasmic	Cytoplasmic	Cytoplasmic	-	-	Unclassified	Role category not yet assigned
15803174	Q8X958	NP_289206.1	Z3954	ygaQ		uncharacterized protein YgaQ [Escherichia coli O157:H7 EDL933]	943 / - / - / 1524	46738	0	0	0	0	0	0	0	0	400.98	0	0	0	33.415	Unknown/Multiple Localization	Cytoplasm	750	Extracellular	Cytoplasmic	Cytoplasmic	Periplasmic	Cytoplasmic	-	-	Hypothetical proteins	Conserved
15800806	Q8XDB4	NP_286822.1	Z1297	(ycbX)		putative iron-sulfur cluster protein YcbX [Escherichia coli O157:H7 EDL933]	944 / - / - / 594	40635.7	0	0	0	0	0	0	0	0	398.758	0	0	0	33.2298	Unknown	Cytoplasm	369	periplasm	Cytoplasmic	Cytoplasmic	Cytoplasmic	Cytoplasmic	-	-	Unclassified	Role category not yet assigned
15800733	Q8X9L3	NP_286747.1	Z1212	_		uncharacterized protein Z1212 [Escherichia coli O157:H7 EDL933]	945 / 1072 / 1470 / 1576	89730.9	119.658	273.201	0	0	0	0	0	0	0	0	0	0	32.7383	Cytoplasmic	Cytoplasm	795	Cytoplasmic	Cytoplasmic	Cytoplasmic	Cytoplasmic	Cytoplasmic	-	-	Purines, pyrimidines, nucleosides, and nucleotides	Pyrimidine ribonucleotide biosynthesis
15802736	Q8XE78	NP_288763.1	Z3439	yejF	IM, Ht-5	putative ATP-binding component of a transport system [Escherichia coli O157:H7 EDL933]	946 / - / 1446 / 1747	58745.75*	0	195.367	197.447	0	0	0	0	0	0	0	0	0	32.7345	Cytoplasmic Membrane	Inner membrane	529	Inner Membrane	X	Cytoplasmic	Cytoplasmic	Cytoplasmic	-	-	Transport and binding proteins	Unknown substrate
15802940	Q8XBN2	NP_288968.1	Z3665	gltX	CY	glutamyl-tRNA synthetase [Escherichia coli O157:H7 EDL933]	947 / 800 / 272 / 1190	53753.7	0	0	0	0	0	0	0	0	0	391.748	0	0	32.6456	Cytoplasmic	Cytoplasm	471	Cytoplasmic	Cytoplasmic	Cytoplasmic	Cytoplasmic	Cytoplasmic	-	-	Protein synthesis	tRNA aminoacylation
15800008	Q8X6H0	NP_286020.1	Z0371	_	CY	putative LysR-like transcriptional regulator [Escherichia coli O157:H7 EDL933]	948 / - / - / 1239	36905.2	0	0	0	0	0	391.375	0	0	0	0	0	0	32.6146	Cytoplasmic	Cytoplasm	329	Cytoplasmic	Cytoplasmic	Cytoplasmic	Cytoplasmic	Cytoplasmic	-	-	Regulatory functions	Other
15800654	Q8XAI0	NP_286668.1	Z1133	_		partial putative transposase [Escherichia coli O157:H7 EDL933]	949 / - / - / -	11511.8	0	0	0	0	0	0	0	0	0	390.604	0	0	32.5504	Unknown	Cytoplasm	103	Cytoplasmic	Cytoplasmic	Cytoplasmic	Cytoplasmic	Cytoplasmic	-	-	Mobile and extrachromosomal element functions	Transposon functions
15799811	Q8X4V8	NP_285823.1	Z0138	yadG	IM	putative ATP-binding component of a transport system [Escherichia coli O157:H7 EDL933]	950 / - / 914 / 1135	34658.9	386.812	0	0	0	0	0	0	0	0	0	0	0	32.2343	Cytoplasmic Membrane	Inner membrane	308	Inner Membrane	Cytoplasmic	Cytoplasmic	Cytoplasmic	Unknown	-	-	Transport and binding proteins	Unknown substrate
15803669	P0ACK4	NP_289702.1	Z4483	agaR	CY	DNA-binding transcriptional regulator AgaR [Escherichia coli O157:H7 EDL933]	951 / 942 / 1346 / 1804	29571.3	0	0	0	0	0	0	0	127.342	0	258.112	0	0	32.1212	Cytoplasmic	Cytoplasm	269	Cytoplasmic	Cytoplasmic	Cytoplasmic	Cytoplasmic	Cytoplasmic	-	-	Regulatory functions	DNA interactions
15804871	Q8XC81	NP_290912.1	Z5892	_		hypothetical protein Z5892 [Escherichia coli O157:H7 EDL933]	952 / - / 1064 / 1739	33302.8	0	0	0	384.493	0	0	0	0	0	0	0	0	32.041	Cytoplasmic	Cytoplasm	294	Unknown	Cytoplasmic	Cytoplasmic	Cytoplasmic	Cytoplasmic	-	-	Hypothetical proteins	Conserved
15800275	Q8XCR8	NP_286287.1	Z0698	nfrA	bb-OM	bacteriophage N4 receptor, outer membrane subunit [Escherichia coli O157:H7 EDL933]	953 / - / - / 1845	111398	0	0	0	0	167.014	0	0	0	217.407	0	0	0	32.0351	Outer Membrane	Outer membrane	990	Outer Membrane	Periplasmic	Cytoplasmic	Periplasmic	Outer Membrane	-	-	Unknown function	General
15804628	P68188	NP_290669.1	Z5633	malK	IM	maltose/maltodextrin transporter ATP-binding protein [Escherichia coli O157:H7 EDL933]	954 / 1104 / - / 454	40989	0	0	0	382.626	0	0	0	0	0	0	0	0	31.8855	Cytoplasmic Membrane	Inner membrane	371	Inner Membrane	Cytoplasmic	Cytoplasmic	Cytoplasmic	Cytoplasmic	-	-	Transport and binding proteins	Carbohydrates, organic alcohols, and acids
15801188	Q8X8M4	NP_287205.1	Z1709	flgM		anti-sigma28 factor FlgM [Escherichia coli O157:H7 EDL933]	955 / - / - / -	10354.2	0	382.564	0	0	0	0	0	0	0	0	0	0	31.8803	Cytoplasmic	Inner membrane	97	Cytoplasmic	Periplasmic	Periplasmic	Periplasmic	Unknown	-	-	Cell envelope	Surface structures
15802300	Q8XCF5	NP_288325.1	Z2942	cheA	CY, Ho-2	chemotaxis protein CheA [Escherichia coli O157:H7 EDL933]	956 / - / - / 1248	71409.7	0	0	0	0	0	221.399	0	157.822	0	0	0	0	31.6018	Cytoplasmic	Inner membrane	654	Cytoplasmic	Cytoplasmic	Cytoplasmic	Cytoplasmic	Cytoplasmic	-	-	Cellular processes	Chemotaxis and motility
15801723	Q8X9U9	NP_287741.1	Z2300	trg	IM	methyl-accepting chemotaxis protein III, ribose sensor receptor [Escherichia coli O157:H7 EDL933]	957 / - / - / -	58930.5	0	0	0	0	0	0	0	121.63	253.58	0	0	0	31.2675	Cytoplasmic Membrane	Inner membrane	546	Inner Membrane	Cytoplasmic	Cytoplasmic	Cytoplasmic	Inner Membrane	-	-	Cellular processes	Chemotaxis and motility
15800207	Q8XD37	NP_286219.1	Z0597	ybaL	IM	putative cation:proton antiport protein [Escherichia coli O157:H7 EDL933]	958 / - / - / -	59435.4	0	373.95	0	0	0	0	0	0	0	0	0	0	31.1625	Cytoplasmic Membrane	Inner membrane	558	Inner Membrane	Cytoplasmic	Cytoplasmic	Cytoplasmic	Inner Membrane	-	-	Transport and binding proteins	Cations and iron carrying compounds
15804985	Q8X3T1	NP_287935.1	Z2546m / Z2547	trpE_2	CY	anthranilate synthase component I [Escherichia coli O157:H7 EDL933]	959 / 1150 / - / 120	57553.98*	0	0	0	0	0	0	0	0	0	0	371.557	0	30.9631	Cytoplasmic	Cytoplasm	86	Cytoplasmic	X	Cytoplasmic	Cytoplasmic	Cytoplasmic	-	-	No Data	No Data
15800266	Q8XCT6	NP_286278.1	Z0684	folD	CY, Ho-2	bifunctional 5,10-methylene-tetrahydrofolate dehydrogenase/ 5,10-methylene-tetrahydrofolate cyclohydrolase [Escherichia coli O157:H7 EDL933]	960 / 659 / 786 / 1550	30954.5	0	0	0	0	0	0	0	0	0	0	0	366.748	30.5623	Cytoplasmic	Cytoplasm	288	Cytoplasmic	Cytoplasmic	Cytoplasmic	Cytoplasmic	Cytoplasmic	-	-	Biosynthesis of cofactors, prosthetic groups, and carriers	Folic acid
161367616	Q8X735	NP_287347.2	Z1862	mnmA (trmU)	CY	tRNA (5-methylaminomethyl-2-thiouridylate)-methyltransferase [Escherichia coli O157:H7 EDL933]	961 / 470 / 728 / -	40986	0	363.02	0	0	0	0	0	0	0	0	0	0	30.2517	Cytoplasmic	Cytoplasm	368	Cytoplasmic	Cytoplasmic	Cytoplasmic	Cytoplasmic	Cytoplasmic	-	-	Protein synthesis	tRNA and rRNA base modification
15800587	P0AEI5	NP_286601.1	Z1061	rimO	CY, Rib	ribosomal protein S12 methyltransferase RimO [Escherichia coli O157:H7 EDL933]	962 / - / - / 341	49580	0	0	0	0	0	0	0	0	0	0	362.789	0	30.2325	Cytoplasmic	Cytoplasm	441	Cytoplasmic	Cytoplasmic	Cytoplasmic	Cytoplasmic	Cytoplasmic	-	-	Protein synthesis	tRNA and rRNA base modification
15801844	P0ACV7	NP_287862.1	Z2448	mpaA (ycjI)	CY	murein peptide amidase A [Escherichia coli O157:H7 EDL933]	963 / - / - / -	28819.7	362.426	0	0	0	0	0	0	0	0	0	0	0	30.2022	Cytoplasmic	Extracellular	242	Unknown	Cytoplasmic	Cytoplasmic	Cytoplasmic	Cytoplasmic	-	-	Unclassified	Role category not yet assigned
15804724	P0A9H4	NP_290765.1	Z5734	cadA	CY	lysine decarboxylase 1 [Escherichia coli O157:H7 EDL933]	964 / 1145 / - / -	81257.1	101.316	0	0	0	0	0	0	108.44	0	149.305	0	0	29.9218	Cytoplasmic	Cytoplasm	715	Cytoplasmic	Cytoplasmic	Cytoplasmic	Cytoplasmic	Cytoplasmic	-	-	Energy metabolism	Amino acids and amines
161367450	Q8XB21	NP_291003.2	Z5991	nadR	CY	nicotinamide-nucleotide adenylyltransferase [Escherichia coli O157:H7 EDL933]	965 / 916 / - / 1847	47372.1	198.096	0	0	0	0	160.925	0	0	0	0	0	0	29.9184	Cytoplasmic	Cytoplasm	417	Cytoplasmic	Cytoplasmic	Cytoplasmic	Cytoplasmic	Cytoplasmic	-	-	Unclassified	Role category not yet assigned
15800321	Q8XBT4	NP_286333.1	Z0750	ahpF	CY, Ht-4, Ht-12	alkyl hydroperoxide reductase, F52a subunit; detoxification of hydroperoxides [Escherichia coli O157:H7 EDL933]	966 / 309 / 245 / 1167	57399.4	0	0	0	0	0	0	0	0	0	356.299	0	0	29.6916	Cytoplasmic Membrane	Cytoplasm	531	Cytoplasmic	Cytoplasmic	Cytoplasmic	Cytoplasmic	Cytoplasmic	-	-	Cellular processes	Detoxification
15800635	Q8X6K4	NP_286649.1	Z1112	ybjX		putative enzyme YbjX [Escherichia coli O157:H7 EDL933]	967 / - / - / -	38252	0	0	0	0	0	0	0	0	0	0	0	355.063	29.5886	Unknown	Cytoplasm	330	Unknown	Cytoplasmic	Cytoplasmic	Cytoplasmic	Cytoplasmic	-	-	Energy metabolism	Electron transport
15804550	Q8X746	NP_290591.1	Z5512	yijO	CY	putative ARAC-type regulatory protein [Escherichia coli O157:H7 EDL933]	968 / - / - / 821	32122.2	0	0	0	0	0	0	0	0	352.381	0	0	0	29.3651	Cytoplasmic	Cytoplasm	283	Cytoplasmic	Cytoplasmic	Cytoplasmic	Cytoplasmic	Unknown	-	-	Regulatory functions	Other
15801705	P67698	NP_287723.1	Z2281	ydcQ		uncharacterized HTH-type transcriptional regulator YcdQ [Escherichia coli O157:H7 EDL933]	969 / - / - / -	16152.83*	0	0	0	0	0	0	349.387	0	0	0	0	0	29.1156	Unknown	Cytoplasm	138	Cytoplasmic	X	Cytoplasmic	Cytoplasmic	Cytoplasmic	-	-	Unclassified	Role category not yet assigned
15804368	Q8XAT6	NP_290408.1	Z5288	rep	CY	ATP-dependent DNA helicase Rep [Escherichia coli O157:H7 EDL933]	970 / - / 1452 / 1144	77155.2*	0	0	0	0	0	67.8645	0	0	0	0	278.726	0	28.8825	Cytoplasmic	Cytoplasm	673	Cytoplasmic	X	Cytoplasmic	Cytoplasmic	Cytoplasmic	-	-	DNA metabolism	DNA replication, recombination, and repair
15801420	Q8XDJ2	NP_287437.1	Z1961	prrA	bb-OM	TonB dependent outer membrane receptor [Escherichia coli O157:H7 EDL933]	971 / - / - / -	73510.06*	0	0	0	0	0	0	0	0	344.127	0	0	0	28.6772	Outer Membrane	Outer membrane	656	Outer Membrane	X	Extracellular	Extracellular	Outer Membrane	-	-	Cell envelope	Other
15804880	Q8XC71	NP_290921.1	Z5901	_		putative helicase [Escherichia coli O157:H7 EDL933]	972 / 1172 / - / 1269	238223	0	139.983	0	0	0	0	0	138.884	0	14.393	0	49.005	28.5221	Cytoplasmic Membrane	Cytoplasm	2113	Cytoplasmic	Cytoplasmic	Periplasmic	Cytoplasmic	Outer Membrane	-	-	Unclassified	Role category not yet assigned
15801301	P69876	NP_287318.1	Z1831	potA	IM	putrescine/spermidine ABC transporter ATPase protein [Escherichia coli O157:H7 EDL933]	973 / - / 1166 / 1121	43026.7	0	340.903	0	0	0	0	0	0	0	0	0	0	28.4086	Cytoplasmic Membrane	Inner membrane	378	Inner Membrane	Cytoplasmic	Cytoplasmic	Cytoplasmic	Cytoplasmic	-	-	Transport and binding proteins	Amino acids, peptides and amines
15804962	P0A9W4	NP_291004.1	Z5993	yjjK	IM	putative ABC transporter ATP-binding protein [Escherichia coli O157:H7 EDL933]	974 / 527 / 599 / 83	62440.5	0	0	0	85.778	0	0	0	0	115.268	138.589	0	0	28.3029	Cytoplasmic	Inner membrane	555	Unknown	Cytoplasmic	Cytoplasmic	Cytoplasmic	Cytoplasmic	-	-	Transport and binding proteins	Unknown substrate
15804380	Q8XAR4	NP_290420.1	Z5300	rfbA (rffH)	CY	dTDP-glucose pyrophosphorylase 2 [Escherichia coli O157:H7 EDL933]	975 / - / - / -	32775.3	338.591	0	0	0	0	0	0	0	0	0	0	0	28.2159	Unknown	Cytoplasm	293	Unknown	Cytoplasmic	Cytoplasmic	Cytoplasmic	Unknown	-	-	Cell envelope	Biosynthesis and degradation of surface polysaccharides and lipopolysaccharides
15804993	Q8X6W2	NP_286592.1	Z1052	_		uncharacterized protein Z1052 [Escherichia coli O157:H7 EDL933]	976 / - / - / -	33393.3*	0	0	0	0	0	0	0	0	337.771	0	0	0	28.1476	Unknown/Multiple Localization	Periplasm	202	Unknown	X	Cytoplasmic	Cytoplasmic	Cytoplasmic	-	-	No Data	No Data
161367639	P0A8E9	NP_286168.2	Z0529	yajQ	CY	nucleotide-binding protein [Escherichia coli O157:H7 EDL933]	977 / - / 64 / 663	18343.1	0	0	0	336.869	0	0	0	0	0	0	0	0	28.0724	Cytoplasmic	Periplasm	163	Unknown	Cytoplasmic	Cytoplasmic	Periplasmic	Cytoplasmic	-	-	Unclassified	Role category not yet assigned
15804526	Q8X779	NP_290566.1	Z5482	priA	CY, Ho-14	primosome assembly protein PriA [Escherichia coli O157:H7 EDL933]	978 / - / - / 1752	81621.9	0	0	0	0	0	0	0	0	0	0	335.691	0	27.9743	Unknown	Cytoplasm	732	Cytoplasmic	Cytoplasmic	Cytoplasmic	Cytoplasmic	Cytoplasmic	-	-	DNA metabolism	DNA replication, recombination, and repair
161367471	P63633	NP_290606.2	Z5528	murI	CY, Ho-2	glutamate racemase [Escherichia coli O157:H7 EDL933]	979 / - / - / 470	31072.8	0	0	0	0	0	333.922	0	0	0	0	0	0	27.8268	Cytoplasmic	Inner membrane	285	Unknown	Cytoplasmic	Cytoplasmic	Cytoplasmic	Cytoplasmic	-	-	Cell envelope	Biosynthesis and degradation of murein sacculus and peptidoglycan
15799947	P0A7B7	NP_285959.1	Z0303	proB	CY, Ho-4	gamma-glutamyl kinase [Escherichia coli O157:H7 EDL933]	980 / 682 / - / 226	39055	0	0	0	0	0	332.574	0	0	0	0	0	0	27.7145	Cytoplasmic	Cytoplasm	367	Cytoplasmic	Cytoplasmic	Cytoplasmic	Cytoplasmic	Cytoplasmic	-	-	Amino acid biosynthesis	Glutamate family
15803348	Q8X6K3	NP_289381.1	Z4146	ptsP	CY	fused phosphoenolpyruvate-protein phosphotransferase PtsP/GAF domain-containing protein [Escherichia coli O157:H7 EDL933]	981 / 753 / 1164 / 1129	83740.5	176.371	0	0	0	0	153.181	0	0	0	0	0	0	27.4627	Cytoplasmic	Cytoplasm	748	Cytoplasmic	Cytoplasmic	Cytoplasmic	Cytoplasmic	Cytoplasmic	-	-	Transport and binding proteins	Other
15800757	Q8X5H5	NP_286771.1	Z1240	dmsA	IM, Ht-3	anaerobic dimethyl sulfoxide reductase subunit A [Escherichia coli O157:H7 EDL933]	982 / 661 / 1422 / -	87419.46*	0	0	0	0	0	0	0	0	0	72.3269	252.394	0	27.06	Cytoplasmic Membrane	Periplasm	785	periplasm	X	Periplasmic	Cytoplasmic	Cytoplasmic	-	-	Energy metabolism	Anaerobic
15799936	Q8X7Q1	NP_285948.1	Z0292	dinP	CY	DNA polymerase IV [Escherichia coli O157:H7 EDL933]	983 / - / 1361 / 1476	39489.4	0	0	0	0	0	0	0	0	0	0	0	322.351	26.8626	Cytoplasmic	Cytoplasm	351	Cytoplasmic	Cytoplasmic	Cytoplasmic	Cytoplasmic	Cytoplasmic	-	-	Unknown function	General
15804034	Q8X5Q1	NP_290070.1	Z4899	yhiR	CY	protein involved in utilization of DNA as a carbon source [Escherichia coli O157:H7 EDL933]	984 / - / 1058 / 1216	31985.5	0	0	0	0	0	0	0	0	0	0	0	321.457	26.7881	Cytoplasmic	Cytoplasm	280	Unknown	Cytoplasmic	Cytoplasmic	Cytoplasmic	Cytoplasmic	-	-	Unknown function	General
15802977	Q8XBG8	NP_289007.1	Z3711	eutE	CY	ethanolamine utilization; acetaldehyde dehydrogenase [Escherichia coli O157:H7 EDL933]	985 / - / 1363 / -	49043.6	0	0	0	0	0	0	0	0	0	0	0	321.099	26.7582	Cytoplasmic	Cytoplasm	467	Unknown	Cytoplasmic	Cytoplasmic	Cytoplasmic	Cytoplasmic	-	-	Energy metabolism	Amino acids and amines
15804809	P0AE47	NP_290850.1	Z5829	ytfL	IM	putative transport protein [Escherichia coli O157:H7 EDL933]	986 / - / - / -	49760.8	0	0	0	319.714	0	0	0	0	0	0	0	0	26.6428	Cytoplasmic Membrane	Inner membrane	447	Unknown	Cytoplasmic	Cytoplasmic	Cytoplasmic	Outer Membrane	-	-	Cellular processes	Pathogenesis
15802913	P58402	NP_288940.1	Z3632	evgS	IM	hybrid sensory histidine kinase in two-component regulatory system with EvgA [Escherichia coli O157:H7 EDL933]	987 / - / - / 1600	134949	0	0	0	0	0	0	0	0	318.261	0	0	0	26.5218	Cytoplasmic Membrane	Inner membrane	1197	Inner Membrane	Cytoplasmic	Cytoplasmic	Cytoplasmic	Inner Membrane	-	-	Unclassified	Role category not yet assigned
15804762	Q8XDN1	NP_290803.1	Z5780	hflX	CY	putative GTPase HflX [Escherichia coli O157:H7 EDL933]	988 / 712 / 488 / 970	48324.4	0	0	0	0	0	0	0	0	316.593	0	0	0	26.3827	Cytoplasmic	Cytoplasm	426	Cytoplasmic	Cytoplasmic	Cytoplasmic	Cytoplasmic	Cytoplasmic	-	-	Protein fate	Degradation of proteins, peptides, and glycopeptides
15804114	P0AGI6	NP_290153.1	Z4993	xylH	IM	putative xylose transport, membrane component [Escherichia coli O157:H7 EDL933]	989 / - / - / 1360	41029.3	0	0	0	0	0	0	316.075	0	0	0	0	0	26.3396	Cytoplasmic Membrane	Inner membrane	393	Inner Membrane	Extracellular	Cytoplasmic	Extracellular	Inner Membrane	-	-	Transport and binding proteins	Carbohydrates, organic alcohols, and acids
15801408	P0AFA8	NP_287425.1	Z1949	nhaB	IM	sodium/proton antiporter [Escherichia coli O157:H7 EDL933]	990 / 1026 / - / -	56745.99*	0	0	314.852	0	0	0	0	0	0	0	0	0	26.2377	Cytoplasmic Membrane	Inner membrane	513	Inner Membrane	X	Cytoplasmic	Cytoplasmic	Inner Membrane	-	-	Transport and binding proteins	Cations and iron carrying compounds
15801302	P65804	NP_287319.1	Z1832	pepT	Cy, Ho-2	peptidase T [Escherichia coli O157:H7 EDL933]	991 / 257 / 1050 / 399	44907.7	0	0	0	0	0	313.922	0	0	0	0	0	0	26.1601	Cytoplasmic	Extracellular	408	Cytoplasmic	Cytoplasmic	Cytoplasmic	Cytoplasmic	Cytoplasmic	-	-	Protein fate	Degradation of proteins, peptides, and glycopeptides
15804424	P0AG72	NP_290464.1	Z5354	yigN		DNA recombination protein RmuC [Escherichia coli O157:H7 EDL933]	992 / 1173 / - / -	54762.4	0	0	0	0	0	171.36	0	0	0	142.222	0	0	26.1318	Unknown	Cytoplasm	475	Cytoplasmic	Cytoplasmic	Cytoplasmic	Cytoplasmic	Inner Membrane	-	-	DNA metabolism	DNA replication, recombination, and repair
15803714	P58216	NP_289748.1	Z4535	yhbX	IM	predicted inner membrane hydrolase [Escherichia coli O157:H7 EDL933]	993 / - / - / -	61475.78*	0	0	0	0	0	0	0	0	0	0	313.43	0	26.1191	Cytoplasmic Membrane	Inner membrane	541	Outer Membrane	X	Cytoplasmic	Cytoplasmic	Inner Membrane	-	-	Central intermediary metabolism	Other
15800387	P61951	NP_286399.1	Z0832	fldA	CY	flavodoxin FldA [Escherichia coli O157:H7 EDL933]	994 / 497 / 135 / 1235	19736.2	0	0	0	0	0	0	0	0	0	313.326	0	0	26.1105	Cytoplasmic	Cytoplasm	176	Unknown	Cytoplasmic	Cytoplasmic	Cytoplasmic	Cytoplasmic	-	-	Energy metabolism	Electron transport
15803708	P60342	NP_289742.1	Z4527	truB	CY	tRNA pseudouridine synthase B [Escherichia coli O157:H7 EDL933]	995 / 449 / 1065 / -	35085.7	0	310.535	0	0	0	0	0	0	0	0	0	0	25.8779	Cytoplasmic	Extracellular	314	Unknown	Cytoplasmic	Cytoplasmic	Cytoplasmic	Cytoplasmic	-	-	Protein synthesis	tRNA and rRNA base modification
15802594	Q8X7E6	NP_288621.1	Z3283	molR_A		putative molybdate metabolism regulator [Escherichia coli O157:H7 EDL933]	996 / - / - / -	27560.8	0	0	0	0	0	0	0	0	0	0	0	309.634	25.8029	Unknown	Cytoplasm	242	Unknown	Periplasmic	Cytoplasmic	Periplasmic	Cytoplasmic	-	-	Biosynthesis of cofactors, prosthetic groups, and carriers	Pantothenate and coenzyme A
15804822	Q8XCF0	NP_290863.1	Z5842	fbp	CY	fructose-1,6-bisphosphatase [Escherichia coli O157:H7 EDL933]	997 / 930 / 810 / 38	36765.5	0	0	0	0	0	307.853	0	0	0	0	0	0	25.6545	Cytoplasmic	Cytoplasm	332	Cytoplasmic	Cytoplasmic	Cytoplasmic	Cytoplasmic	Cytoplasmic	-	-	Energy metabolism	Glycolysis/gluconeogenesis
15802504	P60665	NP_288530.1	Z3187	hisF	CY	imidazole glycerol phosphate synthase subunit HisF [Escherichia coli O157:H7 EDL933]	998 / 990 / 203 / 524	28453.4	0	185.094	0	0	0	0	0	0	0	116.083	0	0	25.0981	Cytoplasmic	Cytoplasm	258	Cytoplasmic	Cytoplasmic	Cytoplasmic	Cytoplasmic	Cytoplasmic	-	-	Amino acid biosynthesis	Histidine family
15804300	Q8XB41	NP_290339.1	Z5198	trmE	CY	tRNA modification GTPase TrmE [Escherichia coli O157:H7 EDL933]	999 / 744 / - / 542	49200.41*	0	0	0	0	0	0	0	0	0	195.591	0	105.372	25.0803	Cytoplasmic	Cytoplasm	454	Cytoplasmic	X	Cytoplasmic	Cytoplasmic	Cytoplasmic	-	-	Protein synthesis	tRNA and rRNA base modification
15804561	Q7A964	NP_290602.1	Z5524	yijC	CY	DNA-binding transcriptional repressor FabR [Escherichia coli O157:H7 EDL933]	1000 / - / - / 690	26514.92*	0	0	0	0	0	0	0	0	0	300.901	0	0	25.0751	Cytoplasmic Membrane	Cytoplasm	215	Cytoplasmic	X	Cytoplasmic	Cytoplasmic	Cytoplasmic	-	-	Regulatory functions	DNA interactions
161367492	Q8XCA5	NP_290238.2	Z5085	yicJ	IM	putative galactose-pentose-hexuronide transporter [Escherichia coli O157:H7 EDL933]	1001 / - / 1289 / -	50903.6	300.694	0	0	0	0	0	0	0	0	0	0	0	25.0578	Cytoplasmic Membrane	Inner membrane	479	Inner Membrane	Cytoplasmic	Cytoplasmic	Cytoplasmic	Inner Membrane	-	-	Energy metabolism	Electron transport
15801231	Q8X8E7	NP_287248.1	Z1754	mfd	CY	transcription-repair coupling factor [Escherichia coli O157:H7 EDL933]	1002 / 877 / 1199 / 486	129931.12*	0	0	0	0	0	0	0	0	0	139.736	157.029	0	24.7305	Cytoplasmic	Cytoplasm	1148	Cytoplasmic	X	Cytoplasmic	Cytoplasmic	Cytoplasmic	-	-	DNA metabolism	DNA replication, recombination, and repair
15803816	Q8XEE5	NP_289850.1	Z4659	sun	CY, Rib	16S rRNA methyltransferase B [Escherichia coli O157:H7 EDL933]	1003 / - / - / 669	48349.7	0	0	0	0	0	0	0	0	0	291.015	0	0	24.2513	Cytoplasmic	Cytoplasm	429	Cytoplasmic	Cytoplasmic	Cytoplasmic	Cytoplasmic	Cytoplasmic	-	-	Protein synthesis	tRNA and rRNA base modification
15800179	P0AAG7	NP_286191.1	Z0559	mdlB	IM	putative multidrug transporter membrane\ATP-binding components [Escherichia coli O157:H7 EDL933]	1004 / - / - / -	65220.1	0	289.85	0	0	0	0	0	0	0	0	0	0	24.1542	Cytoplasmic Membrane	Inner membrane	593	Inner Membrane	Cytoplasmic	Cytoplasmic	Cytoplasmic	Inner Membrane	-	-	Cellular processes	Toxin production and resistance
15804817	P0A7B0	NP_290858.1	Z5837	ppa	CY, Ho-6	inorganic pyrophosphatase [Escherichia coli O157:H7 EDL933]	1005 / 37 / 529 / 709	19702.8	0	0	0	0	0	0	285.833	0	0	0	0	0	23.8194	Cytoplasmic	Cytoplasm	176	Cytoplasmic	Cytoplasmic	Cytoplasmic	Cytoplasmic	Cytoplasmic	-	-	Central intermediary metabolism	Phosphorus compounds
15803359	Q8X6J2	NP_289392.1	Z4157	lysR	CY	DNA-binding transcriptional regulator LysR [Escherichia coli O157:H7 EDL933]	1006 / - / - / -	34481.24*	0	0	0	0	0	0	0	0	0	0	0	285.138	23.7615	Cytoplasmic	Cytoplasm	311	Cytoplasmic	X	Cytoplasmic	Cytoplasmic	Cytoplasmic	-	-	Amino acid biosynthesis	Aspartate family
157267360	Q8X8T9	NP_288516.2	Z3173	sbcB	CY	exonuclease I [Escherichia coli O157:H7 EDL933]	1007 / 542 / 1066 / 1180	54492.18*	284.593	0	0	0	0	0	0	0	0	0	0	0	23.7161	Cytoplasmic	Cytoplasm	475	Unknown	X	Cytoplasmic	Cytoplasmic	Cytoplasmic	-	-	DNA metabolism	Degradation of DNA
15804824	P0A8X1	NP_290865.1	Z5844	yjgA	CY, 50S Rib	putative alpha-helix protein [Escherichia coli O157:H7 EDL933]	1008 / 927 / 475 / -	21358.5	0	0	0	0	0	0	284.206	0	0	0	0	0	23.6838	Cytoplasmic	Periplasm	183	Unknown	Cytoplasmic	Cytoplasmic	Cytoplasmic	Cytoplasmic	-	-	Unknown function	General
15802345	Q8XBD9	NP_288371.1	Z2993	tra8_2		IS30 transposase encoded within prophage CP-933T [Escherichia coli O157:H7 EDL933]	1009 / - / - / -	45541.6	0	0	0	0	0	0	131.761	0	152.2	0	0	0	23.6634	Cytoplasmic	Cytoplasm	396	Cytoplasmic	Cytoplasmic	Cytoplasmic	Cytoplasmic	Cytoplasmic	-	-	Mobile and extrachromosomal element functions	Transposon functions
15804597	Q8X611	NP_290638.1	Z5583	purH	CY, Ho-2	bifunctional phosphoribosylaminoimidazolecarboxamide formyltransferase/IMP cyclohydrolase [Escherichia coli O157:H7 EDL933]	1010 / 151 / 563 / 1184	57355.8	0	0	0	0	0	0	0	0	0	0	283.723	0	23.6436	Cytoplasmic	Extracellular	529	Unknown	Cytoplasmic	Cytoplasmic	Cytoplasmic	Cytoplasmic	-	-	Purines, pyrimidines, nucleosides, and nucleotides	Purine ribonucleotide biosynthesis
15802667	Q7DBB9	NP_288694.1	Z3366	_		putative recombination protein Bet of prophage CP-933V [Escherichia coli O157:H7 EDL933]	1011 / - / - / -	29723.24*	0	0	0	0	0	0	0	0	0	283.589	0	0	23.6324	Cytoplasmic	Cytoplasm	261	Cytoplasmic	X	Cytoplasmic	Cytoplasmic	Cytoplasmic	-	-	Mobile and extrachromosomal element functions	Prophage functions
15803440	Q8XD32	NP_289473.1	Z4242	gcvT	CY, Ht-6	glycine cleavage system aminomethyltransferase T [Escherichia coli O157:H7 EDL933]	1012 / 251 / 53 / 97	40188.2	283.529	0	0	0	0	0	0	0	0	0	0	0	23.6274	Cytoplasmic	Cytoplasm	364	Cytoplasmic	Cytoplasmic	Cytoplasmic	Cytoplasmic	Cytoplasmic	-	-	Energy metabolism	Amino acids and amines
15799738	P0ABZ8	NP_285750.1	Z0062	surA	PP	peptidyl-prolyl cis-trans isomerase SurA [Escherichia coli O157:H7 EDL933]	1013 / 678 / 168 / 1356	47281.9	0	0	0	283.114	0	0	0	0	0	0	0	0	23.5928	Periplasmic	Periplasm	428	periplasm	Periplasmic	Cytoplasmic	Periplasmic	Unknown	-	-	Protein fate	Protein folding and stabilization
15802901	Q8XCL7	NP_288928.1	Z3620	_		hypothetical protein Z3620 [Escherichia coli O157:H7 EDL933]	1014 / - / - / 911	53432.4	210.097	72.7335	0	0	0	0	0	0	0	0	0	0	23.5692	Cytoplasmic	Cytoplasm	470	Unknown	Cytoplasmic	Cytoplasmic	Cytoplasmic	Cytoplasmic	-	-	Hypothetical proteins	Conserved
15804382	Q8XAR1	NP_290422.1	Z5302	wecE (rffA)	CY	TDP-4-oxo-6-deoxy-D-glucose transaminase [Escherichia coli O157:H7 EDL933]	1015 / - / - / 344	41936.3*	0	0	0	0	0	0	0	0	0	282.58	0	0	23.5484	Cytoplasmic	Cytoplasm	376	Unknown	X	Cytoplasmic	Cytoplasmic	Cytoplasmic	-	-	Cell envelope	Biosynthesis and degradation of surface polysaccharides and lipopolysaccharides
15802766	Q8XE42	NP_288793.1	Z3471	ada	CY/IM	O6-methylguanine-DNA methyltransferase; transcription activator/repressor [Escherichia coli O157:H7 EDL933]	1016 / - / - / -	39231	0	0	0	0	281.256	0	0	0	0	0	0	0	23.438	Unknown	Cytoplasm	354	Cytoplasmic	Cytoplasmic	Cytoplasmic	Cytoplasmic	Cytoplasmic	-	-	DNA metabolism	DNA replication, recombination, and repair
15799744	Q8XA09	NP_285756.1	Z0068	polB	CY	DNA polymerase II [Escherichia coli O157:H7 EDL933]	1017 / - / - / -	90137.4	0	0	0	0	0	140.782	0	0	0	0	138.205	0	23.249	Cytoplasmic	Cytoplasm	783	Unknown	Cytoplasmic	Cytoplasmic	Cytoplasmic	Cytoplasmic	-	-	DNA metabolism	DNA replication, recombination, and repair
15799903	Q8X7V7	NP_285915.1	Z0254	_	CY	putative ATP-dependent Clp proteinase [Escherichia coli O157:H7 EDL933]	1018 / 859 / 1400 / 1734	101226	0	0	0	0	0	0	0	0	0	277.991	0	0	23.1659	Cytoplasmic	Cytoplasm	923	Cytoplasmic	Cytoplasmic	Cytoplasmic	Cytoplasmic	Cytoplasmic	-	-	Hypothetical proteins	Conserved
15802917	P58403	NP_288945.1	Z3640	yfdX		uncharacterized protein YfdX [Escherichia coli O157:H7 EDL933]	1019 / 1038 / 1170 / -	22962.2	0	0	277.834	0	0	0	0	0	0	0	0	0	23.1528	Unknown	Cytoplasm	211	Unknown	Cytoplasmic	Periplasmic	Periplasmic	Unknown	-	-	Hypothetical proteins	Conserved
15804386	Q8XAQ3	NP_290426.1	Z5306	wecG (rffM)	CY	putative UDP-N-acetyl-D-mannosaminuronic acid transferase [Escherichia coli O157:H7 EDL933]	1020 / - / - / -	27979.2	0	0	0	274.23	0	0	0	0	0	0	0	0	22.8525	Cytoplasmic	Cytoplasm	246	Cytoplasmic	Cytoplasmic	Cytoplasmic	Cytoplasmic	Unknown	-	-	Cell envelope	Biosynthesis and degradation of surface polysaccharides and lipopolysaccharides
15803643	Q8XAH0	NP_289676.1	Z4456	yqjG		putative transferase [Escherichia coli O157:H7 EDL933]	1021 / 1133 / 1359 / -	37535.6*	0	0	0	0	0	0	0	0	0	273.18	0	0	22.765	Cytoplasmic	Cytoplasm	328	Cytoplasmic	X	Cytoplasmic	Cytoplasmic	Cytoplasmic	-	-	Cell envelope	Biosynthesis and degradation of surface polysaccharides and lipopolysaccharides
15803941	Q8X6X6	NP_289977.1	Z4796	glgB	CY	glycogen branching enzyme [Escherichia coli O157:H7 EDL933]	1022 / 534 / 319 / 1246	84365.8	0	0	0	0	0	0	0	197.942	0	73.3324	0	0	22.6062	Cytoplasmic	Extracellular	728	Cytoplasmic	Cytoplasmic	Cytoplasmic	Cytoplasmic	Cytoplasmic	-	-	Energy metabolism	Biosynthesis and degradation of polysaccharides
15800287	Q8XEH9	NP_286299.1	Z0713	ylcD	IM	copper/silver efflux system membrane fusion protein CusB [Escherichia coli O157:H7 EDL933]	1023 / - / - / 1642	44321.1	0	0	0	0	0	0	268.494	0	0	0	0	0	22.3745	Unknown	Inner membrane	407	periplasm	Periplasmic	Cytoplasmic	Cytoplasmic	Periplasmic	-	-	Transport and binding proteins	Other
15800455	Q8X965	NP_286467.1	Z0907	tolA	IM, Ht-7	cell envelope integrity inner membrane protein TolA [Escherichia coli O157:H7 EDL933]	1024 / 492 / 1091 / -	40515.4	0	0	0	0	0	0	0	0	0	0	268.427	0	22.3689	Cytoplasmic	Cytoplasm	394	Inner Membrane	Periplasmic	Periplasmic	Periplasmic	Outer Membrane	-	-	Cellular processes	Toxin production and resistance
15800111	Q8XEB2	NP_286123.1	Z0481	yaiC	IM	diguanylate cyclase AdrA [Escherichia coli O157:H7 EDL933]	1025 / - / - / 940	41549	0	0	0	0	0	261.81	0	0	0	0	0	0	21.8175	Cytoplasmic Membrane	Inner membrane	371	Inner Membrane	Cytoplasmic	Cytoplasmic	Cytoplasmic	Inner Membrane	-	-	Unknown function	General
15804829	Q8XCE1	NP_290870.1	Z5849	treC	CY	trehalose-6-phosphate hydrolase [Escherichia coli O157:H7 EDL933]	1026 / - / 931 / 67	63771.3	0	0	0	0	0	0	261.121	0	0	0	0	0	21.7601	Cytoplasmic	Extracellular	551	Cytoplasmic	Cytoplasmic	Cytoplasmic	Cytoplasmic	Extracellular	-	-	Energy metabolism	Other
15803911	Q8X728	NP_289947.1	Z4762	yhgF	CY	predicted transcriptional accessory protein YhgF [Escherichia coli O157:H7 EDL933]	1027 / 479 / 1456 / 275	81425.3	134.819	0	0	0	0	123.667	0	0	0	0	0	0	21.5405	Cytoplasmic	Cytoplasm	740	Cytoplasmic	Cytoplasmic	Cytoplasmic	Cytoplasmic	Cytoplasmic	-	-	Unknown function	General
15800973	A7UQW6	NP_286989.1	Z1479	_		hypothetical protein Z1479 [Escherichia coli O157:H7 EDL933]	1028 / 1121 / - / 1234	44903.2	0	0	0	256.061	0	0	0	0	0	0	0	0	21.3384	Unknown	Cytoplasm	404	Unknown	Periplasmic	Periplasmic	Cytoplasmic	Cytoplasmic	-	-	Hypothetical proteins	Conserved
15804399	Q8X8P7	NP_290439.1	Z5327	yigA		uncharacterized protein YigA [Escherichia coli O157:H7 EDL933]	1029 / - / - / 757	26755.9	0	0	0	254.571	0	0	0	0	0	0	0	0	21.2143	Cytoplasmic	Inner membrane	235	Unknown	Cytoplasmic	Cytoplasmic	Cytoplasmic	Cytoplasmic	-	-	Unknown function	General
15803568	Q8X524	NP_289601.1	Z4378	qseC	IM	sensor protein QseC [Escherichia coli O157:H7 EDL933]	1030 / - / 1331 / -	50256.8	0	0	0	0	0	250.4	0	0	0	0	0	0	20.8667	Cytoplasmic Membrane	Inner membrane	449	Inner Membrane	Cytoplasmic	Cytoplasmic	Cytoplasmic	Inner Membrane	-	-	Regulatory functions	Other
15803275	Q8X7V8	NP_289307.1	Z4067	_		hypothetical protein Z4067 [Escherichia coli O157:H7 EDL933]	1031 / - / - / 1740	38400.9	0	0	0	0	0	0	0	0	248.727	0	0	0	20.7272	Cytoplasmic	Cytoplasm	351	Unknown	Cytoplasmic	Cytoplasmic	Cytoplasmic	Cytoplasmic	-	-	Mobile and extrachromosomal element functions	Other
15800550	Q8X7Y1	NP_286562.1	Z1019	_		hypothetical protein Z1019 [Escherichia coli O157:H7 EDL933]	1032 / 772 / - / 1667	76847.99*	99.147	0	0	0	0	0	0	0	0	0	146.797	0	20.4953	Cytoplasmic	Periplasm	670	Unknown	X	Cytoplasmic	Cytoplasmic	Extracellular	-	-	Hypothetical proteins	Conserved
15800697	Q9LAN9	NP_286711.1	Z1176	terE	CY	putative phage inhibition, colicin resistance and tellurite resistance protein [Escherichia coli O157:H7 EDL933]	1033 / 416 / 27 / 526	20478.8	0	0	0	0	0	0	0	0	0	245.919	0	0	20.4932	Cytoplasmic	Cytoplasm	191	Unknown	Periplasmic	Cytoplasmic	Cytoplasmic	Cytoplasmic	-	-	Cellular processes	Adaptations to atypical conditions
15802160	Q8XDY5	NP_288182.1	Z2781	xthA	CY	exonuclease III [Escherichia coli O157:H7 EDL933]	1034 / 1045 / - / 176	30950	0	0	0	0	0	244.979	0	0	0	0	0	0	20.4149	Cytoplasmic	Extracellular	268	Unknown	Cytoplasmic	Cytoplasmic	Cytoplasmic	Cytoplasmic	-	-	DNA metabolism	DNA replication, recombination, and repair
15802425	Q8X8Z4	NP_288451.1	Z3089	_		putative tail fiber component Z of prophage CP-933U [Escherichia coli O157:H7 EDL933]	1035 / - / - / 1417	23441.9	0	0	0	0	0	243.16	0	0	0	0	0	0	20.2633	Unknown	Cytoplasm	209	Unknown	Periplasmic	Cytoplasmic	Extracellular	Cytoplasmic	-	-	Hypothetical proteins	Conserved
15800199	Q8XD46	NP_286211.1	Z0587	dnaX	CY, Ht-6	DNA polymerase III subunits gamma and tau [Escherichia coli O157:H7 EDL933]	1036 / - / - / 887	71094.8	0	0	0	0	0	242.8	0	0	0	0	0	0	20.2333	Cytoplasmic	Inner membrane	643	Cytoplasmic	Cytoplasmic	Cytoplasmic	Cytoplasmic	Cytoplasmic	-	-	DNA metabolism	DNA replication, recombination, and repair
15803999	Q8X6L3	NP_290035.1	Z4861	_	IM	hypothetical protein Z4861 [Escherichia coli O157:H7 EDL933]	1037 / - / - / -	84248.82*	0	0	0	0	0	0	0	0	0	0	241.31	0	20.1092	Cytoplasmic Membrane	Inner membrane	772	Inner Membrane	X	Periplasmic	Cytoplasmic	Inner Membrane	-	-	Cell envelope	Other
15803534	Q8XBW2	NP_289567.1	Z4343	yghU	CY	putative glutathione S-transferase YghU [Escherichia coli O157:H7 EDL933]	1038 / 365 / 447 / 1346	34227.5	0	0	0	0	0	0	0	0	0	240.156	0	0	20.013	Unknown	Cytoplasm	304	Cytoplasmic	Cytoplasmic	Cytoplasmic	Cytoplasmic	Cytoplasmic	-	-	Unknown function	General
15803031	P64295	NP_289061.1	Z3771	guaA	CY, Ho-2	bifunctional GMP synthase/glutamine amidotransferase protein [Escherichia coli O157:H7 EDL933]	1039 / 216 / 798 / 113	58609.7*	0	0	0	170.974	0	0	0	0	0	68.4194	0	0	19.9494	Cytoplasmic	Cytoplasm	525	Cytoplasmic	X	Cytoplasmic	Cytoplasmic	Cytoplasmic	-	-	Protein synthesis	tRNA aminoacylation
15804627	P0AEY0	NP_290668.1	Z5632	malE	PP	maltose ABC transporter periplasmic protein [Escherichia coli O157:H7 EDL933]	1040 / 903 / 133 / 1289	43385.8	0	0	0	0	0	0	0	0	238.353	0	0	0	19.8628	Periplasmic	Periplasm	396	periplasm	Periplasmic	Periplasmic	Periplasmic	Periplasmic	-	-	Transport and binding proteins	Carbohydrates, organic alcohols, and acids
15804929	Q8XB63	NP_290971.1	Z5955	tsr	IM	methyl-accepting chemotaxis protein I, serine sensor receptor [Escherichia coli O157:H7 EDL933]	1041 / - / - / 1725	59839.75*	0	0	237.324	0	0	0	0	0	0	0	0	0	19.777	Cytoplasmic Membrane	Inner membrane	554	Inner Membrane	X	Cytoplasmic	Cytoplasmic	Inner Membrane	-	-	Cellular processes	Chemotaxis and motility
15804443	P0ADQ1	NP_290483.1	Z5390	yihD	CY	hypothetical protein Z5390 [Escherichia coli O157:H7 EDL933]	1042 / 290 / 97 / 1063	10272.6	0	0	0	0	0	0	0	0	0	234.774	0	0	19.5645	Cytoplasmic	Cytoplasm	89	Unknown	Cytoplasmic	Cytoplasmic	Cytoplasmic	Cytoplasmic	-	-	Unclassified	Role category not yet assigned
15803520	Q8XBX8	NP_289553.1	Z4328	st48		uncharacterized protein st48 [Escherichia coli O157:H7 EDL933]	1043 / - / 1299 / -	37641.3	233.403	0	0	0	0	0	0	0	0	0	0	0	19.4503	Cytoplasmic	Cytoplasm	329	Unknown	Cytoplasmic	Cytoplasmic	Cytoplasmic	Cytoplasmic	-	-	Hypothetical proteins	Conserved
15801015	P69435	NP_287031.1	Z1526	ycdS	bb-OM	outer membrane protein PgaA [Escherichia coli O157:H7 EDL933]	1044 / - / 1351 / -	92209.24*	0	230.244	0	0	0	0	0	0	0	0	0	0	19.187	Unknown	Outer membrane	807	Outer Membrane	X	Periplasmic	Periplasmic	Outer Membrane	-	-	Energy metabolism	Electron transport
15802498	Q8X8T4	NP_288524.1	Z3181	hisG	CY	ATP phosphoribosyltransferase [Escherichia coli O157:H7 EDL933]	1045 / 846 / 864 / 549	33350.5	0	0	0	0	0	0	0	0	0	229.517	0	0	19.1264	Cytoplasmic	Cytoplasm	299	Cytoplasmic	Cytoplasmic	Cytoplasmic	Cytoplasmic	Cytoplasmic	-	-	Amino acid biosynthesis	Histidine family
15804176	P64148	NP_290215.1	Z5059	mutM	CY, Ho-1	formamidopyrimidine-DNA glycosylase [Escherichia coli O157:H7 EDL933]	1046 / - / - / 1500	30259	0	0	0	226.095	0	0	0	0	0	0	0	0	18.8412	Cytoplasmic	Cytoplasm	269	Cytoplasmic	Cytoplasmic	Cytoplasmic	Cytoplasmic	Cytoplasmic	-	-	DNA metabolism	DNA replication, recombination, and repair
15802606	Q8XED7	NP_288633.1	Z3295	yehQ		uncharacterized protein YehQ [Escherichia coli O157:H7 EDL933]	1047 / - / - / -	82590.3	0	225.863	0	0	0	0	0	0	0	0	0	0	18.8219	Cytoplasmic Membrane	Cytoplasm	745	Cytoplasmic	Cytoplasmic	Cytoplasmic	Cytoplasmic	Cytoplasmic	-	-	Unknown function	General
15803768	Q8X9F1	NP_289802.1	Z4593	degQ	PP, Ho-12	serine endoprotease [Escherichia coli O157:H7 EDL933]	1048 / 120 / 404 / 783	47222.98*	0	0	0	0	0	0	0	0	0	223.999	0	0	18.6666	Periplasmic	Extracellular	455	Extracellular	X	Cytoplasmic	Cytoplasmic	Unknown	-	-	Protein fate	Degradation of proteins, peptides, and glycopeptides
75994472	Q7BSW4	YP_325586.1	L7026	_		uncharacterized protein with hydrolase activity L7026 [Escherichia coli O157:H7 EDL933]	1049 / - / 743 / -	32188.7	222.365	0	0	0	0	0	0	0	0	0	0	0	18.5304	Cytoplasmic	Cytoplasm	273	Cytoplasmic	Extracellular	Cytoplasmic	Cytoplasmic	Cytoplasmic	Cytoplasmic	-	No Data	No Data
15803308	P0AES3	NP_289341.1	Z4102	ygcX		putative glucarate dehydratase [Escherichia coli O157:H7 EDL933]	1050 / 658 / - / -	49138.65*	0	0	0	0	0	0	0	0	0	0	221.334	0	18.4445	Unknown	Cytoplasm	446	Unknown	X	Cytoplasmic	Cytoplasmic	Cytoplasmic	-	-	Amino acid biosynthesis	Pyruvate family
15803785	Q8X9C7	NP_289819.1	Z4611	csrD (yhdA)	IM	regulatory protein CsrD [Escherichia coli O157:H7 EDL933]	1051 / - / - / 1770	73336.6	0	0	0	0	0	0	0	0	0	0	220.788	0	18.399	Cytoplasmic Membrane	Inner membrane	646	Inner Membrane	Cytoplasmic	Periplasmic	Cytoplasmic	Inner Membrane	-	-	Unclassified	Role category not yet assigned
15804129	Q8XDJ0	NP_290168.1	Z5009	_		hypothetical protein Z5009 [Escherichia coli O157:H7 EDL933]	1052 / 847 / 809 / 1554	48523.5	0	0	0	0	0	0	0	0	0	215.904	0	0	17.992	Cytoplasmic	Cytoplasm	431	Unknown	Cytoplasmic	Cytoplasmic	Cytoplasmic	Cytoplasmic	-	-	Unclassified	Role category not yet assigned
15803560	Q8XBS7	NP_289593.1	Z4370	ygiQ		uncharacterized protein YgiQ [Escherichia coli O157:H7 EDL933]	1053 / - / - / 1479	83393.14*	0	92.6005	120.051	0	0	0	0	0	0	0	0	0	17.721	Cytoplasmic	Cytoplasm	739	Cytoplasmic	X	Cytoplasmic	Periplasmic	Cytoplasmic	-	-	Unknown function	Enzymes of unknown specificity
15802221	Q8XDR3	NP_288244.1	Z2851	(yoaA)		putative ATP-dependent helicase [Escherichia coli O157:H7 EDL933]	1054 / - / - / 1863	70359.1	0	212.369	0	0	0	0	0	0	0	0	0	0	17.6974	Cytoplasmic	Cytoplasm	636	Cytoplasmic	Periplasmic	Cytoplasmic	Periplasmic	Cytoplasmic	-	-	Energy metabolism	Electron transport
161367487	Q8XBZ8	NP_290328.2	Z5186	yidS		putative oxidoreductase [Escherichia coli O157:H7 EDL933]	1055 / 1024 / - / -	40122.9	0	0	0	0	0	0	0	0	0	0	211.701	0	17.6418	Unknown	Cytoplasm	354	Unknown	Cytoplasmic	Cytoplasmic	Cytoplasmic	Cytoplasmic	-	-	Hypothetical proteins	Conserved
15801849	Q8X8K8	NP_287867.1	Z2458	ycjX		putative enzyme YcjF [Escherichia coli O157:H7 EDL933]	1056 / - / 979 / -	52608.6	0	0	0	0	0	0	0	0	210.697	0	0	0	17.5581	Cytoplasmic	Periplasm	465	Cytoplasmic	Cytoplasmic	Cytoplasmic	Cytoplasmic	Cytoplasmic	-	-	Energy metabolism	Electron transport
15801633	Q8XAX3	NP_287650.1	Z2203	_	bb-OM	putative fimbrial usher protein [Escherichia coli O157:H7 EDL933]	1057 / - / 1442 / -	96703.1	0	0	0	0	0	210.425	0	0	0	0	0	0	17.5354	Outer Membrane	Outer membrane	883	Inner Membrane	Extracellular	Extracellular	Extracellular	Outer Membrane	-	-	No Data	No Data
15799688	P0A871	NP_285700.1	Z0008	talB	CY, Ho-2	transaldolase B [Escherichia coli O157:H7 EDL933]	1058 / 57 / 111 / 332	35217.9	209.721	0	0	0	0	0	0	0	0	0	0	0	17.4768	Cytoplasmic	Cytoplasm	317	Cytoplasmic	Cytoplasmic	Cytoplasmic	Cytoplasmic	Cytoplasmic	-	-	Energy metabolism	Pentose phosphate pathway
15802562	Q8X7H9	NP_288589.1	Z3250	yegQ		predicted peptidase YegQ [Escherichia coli O157:H7 EDL933]	1059 / 1059 / 1332 / 900	51177.2	0	0	0	0	0	0	0	0	0	206.262	0	0	17.1885	Cytoplasmic	Extracellular	453	Unknown	Cytoplasmic	Cytoplasmic	Cytoplasmic	Cytoplasmic	-	-	Protein fate	Degradation of proteins, peptides, and glycopeptides
15804111	Q7A9X4	NP_290150.1	Z4990	xylA	CY, Ho-4	xylose isomerase [Escherichia coli O157:H7 EDL933]	1060 / 598 / - / 1410	49664.1	0	0	0	0	0	0	0	0	0	205.384	0	0	17.1153	Cytoplasmic	Cytoplasm	440	Cytoplasmic	Cytoplasmic	Cytoplasmic	Cytoplasmic	Cytoplasmic	-	-	Energy metabolism	Sugars
15800584	Q8X6V3	NP_286598.1	Z1058	yliF	IM	uncharacterized membrane protein YliF [Escherichia coli O157:H7 EDL933]	1061 / - / - / -	49875.2	0	0	0	0	0	0	0	0	0	0	204.094	0	17.0078	Cytoplasmic Membrane	Inner membrane	442	Unknown	Cytoplasmic	Cytoplasmic	Cytoplasmic	Inner Membrane	-	-	Unknown function	General
15804172	Q8XDB7	NP_290211.1	Z5055	rfaG	CY	glucosyltransferase I; lipopolysaccharide core biosynthesis [Escherichia coli O157:H7 EDL933]	1062 / - / - / 1304	42507.7	0	0	0	0	0	0	0	203.429	0	0	0	0	16.9524	Cytoplasmic	Cytoplasm	374	Unknown	Cytoplasmic	Cytoplasmic	Cytoplasmic	Cytoplasmic	-	-	Cell envelope	Biosynthesis and degradation of surface polysaccharides and lipopolysaccharides
15801208	P0A6R2	NP_287225.1	Z1730	fabH	CY	3-oxoacyl-(acyl carrier protein) synthase III [Escherichia coli O157:H7 EDL933]	1063 / 775 / 845 / 61	33513.7	0	0	0	0	0	0	199.765	0	0	0	0	0	16.6471	Cytoplasmic	Cytoplasm	317	Cytoplasmic	Cytoplasmic	Cytoplasmic	Cytoplasmic	Cytoplasmic	-	-	Fatty acid and phospholipid metabolism	Other
15802404	Q8XB74	NP_288430.1	Z3063	yedY	PP/IM	putative sulfite oxidase subunit YedY [Escherichia coli O157:H7 EDL933]	1064 / - / 1022 / 1448	37417.21*	0	0	0	0	0	197.762	0	0	0	0	0	0	16.4802	Unknown	Cytoplasm	334	Unknown	X	Cytoplasmic	Periplasmic	Periplasmic	-	-	Energy metabolism	Electron transport
15801854	Q8X8K1	NP_287872.1	Z2467	ycjT	CY	uncharacterized protein YcjT [Escherichia coli O157:H7 EDL933]	1065 / - / - / -	84798.2	0	0	0	0	0	0	0	0	0	0	197.759	0	16.4799	Cytoplasmic	Cytoplasm	755	Unknown	Cytoplasmic	Cytoplasmic	Cytoplasmic	Cytoplasmic	-	-	Cellular processes	Toxin production and resistance
15804617	Q8X5Y1	NP_290658.1	Z5622	lysC	CY, Ho-2	aspartate kinase III [Escherichia coli O157:H7 EDL933]	1066 / - / 1387 / -	48515.8	0	0	0	0	0	0	0	0	0	196.646	0	0	16.3872	Unknown/Multiple Localization	Cytoplasm	449	Cytoplasmic	Cytoplasmic	Cytoplasmic	Cytoplasmic	Unknown	-	-	Amino acid biosynthesis	Aspartate family
15802903	Q8XCL3	NP_288930.1	Z3622	_	CY	putative resolvase [Escherichia coli O157:H7 EDL933]	1067 / - / - / 1751	23624.4	0	0	0	0	0	0	0	0	0	0	0	194.521	16.2101	Cytoplasmic	Cytoplasm	208	Cytoplasmic	Cytoplasmic	Cytoplasmic	Cytoplasmic	Cytoplasmic	-	-	DNA metabolism	DNA replication, recombination, and repair
15800153	Q8XE74	NP_286165.1	Z0526	yajK	CY	thiamine biosynthesis protein ThiI [Escherichia coli O157:H7 EDL933]	1068 / 1092 / - / 954	55001.2	0	0	0	0	0	192.21	0	0	0	0	0	0	16.0175	Cytoplasmic	Cytoplasm	482	Cytoplasmic	Cytoplasmic	Cytoplasmic	Cytoplasmic	Cytoplasmic	-	-	Purines, pyrimidines, nucleosides, and nucleotides	Pyrimidine ribonucleotide biosynthesis
15803630	P0AGE5	NP_289663.1	Z4442	ygjU	IM	serine/threonine transporter SstT [Escherichia coli O157:H7 EDL933]	1069 / 921 / 807 / -	43476.1	0	0	0	0	0	0	0	0	0	190.396	0	0	15.8664	Cytoplasmic Membrane	Inner membrane	414	Inner Membrane	Extracellular	Cytoplasmic	Cytoplasmic	Inner Membrane	-	-	Transport and binding proteins	Carbohydrates, organic alcohols, and acids
15801878	Q8X4R0	NP_287898.1	Z2500	sapF	IM	putative ATP-binding protein of peptide transport system [Escherichia coli O157:H7 EDL933]	1070 / - / - / 1593	30568.5	0	0	0	0	0	0	0	190.355	0	0	0	0	15.8629	Cytoplasmic Membrane	Inner membrane	268	Inner Membrane	Cytoplasmic	Cytoplasmic	Cytoplasmic	Cytoplasmic	-	-	Transport and binding proteins	Amino acids, peptides and amines
75994480	O82884	YP_325594.1	L7034	etpE	IM, Ht-Mu	type II secretion protein [Escherichia coli O157:H7 EDL933]	1071 / - / - / 1848	55927	0	0	0	0	0	0	0	190.286	0	0	0	0	15.8572	Cytoplasmic	Inner membrane	501	Cytoplasmic	Cytoplasmic	Cytoplasmic	Cytoplasmic	Cytoplasmic	Cytoplasmic	-	No Data	No Data
75994474	O82936	YP_325588.1	L7028	_	IM	uncharacterized protein with hydrolase activity L7028 [Escherichia coli O157:H7 EDL933]	1072 / - / - / -	66234.1	0	0	0	0	0	190.051	0	0	0	0	0	0	15.8376	Cytoplasmic Membrane	Inner membrane	573	Inner Membrane	Outer Membrane	Cytoplasmic	Cytoplasmic	Cytoplasmic	Inner Membrane	-	No Data	No Data
15803504	Q8XCS3	NP_289537.1	Z4310	speC	CY	ornithine decarboxylase [Escherichia coli O157:H7 EDL933]	1073 / 962 / - / 1724	81622.7	0	0	0	0	0	0	0	0	187.196	0	0	0	15.5996	Cytoplasmic	Cytoplasm	731	Cytoplasmic	Cytoplasmic	Cytoplasmic	Cytoplasmic	Cytoplasmic	-	-	Central intermediary metabolism	Polyamine biosynthesis
15800732	Q8X9L4	NP_286746.1	Z1211	_	Ex/OM	putative adhesin /autotransporter [Escherichia coli O157:H7 EDL933]	1074 / 1078 / - / -	104241	186.186	0	0	0	0	0	0	0	0	0	0	0	15.5155	Outer Membrane	Extracellular	1005	Extracellular	Extracellular	Extracellular	Extracellular	Outer Membrane	-	-	Cell envelope	Surface structures
15803022	Q8XAC5	NP_289052.1	Z3762	purM	CY	phosphoribosylaminoimidazole synthetase [Escherichia coli O157:H7 EDL933]	1075 / 918 / 1078 / 136	36854.37*	0	0	0	0	0	0	0	0	0	182.733	0	0	15.2277	Cytoplasmic	Cytoplasm	345	Cytoplasmic	X	Cytoplasmic	Cytoplasmic	Cytoplasmic	-	-	Purines, pyrimidines, nucleosides, and nucleotides	Purine ribonucleotide biosynthesis
15803890	P0AEE9	NP_289926.1	Z4740	dam	CY	DNA adenine methylase [Escherichia coli O157:H7 EDL933]	1076 / - / - / 1334	32098.3	0	0	0	0	0	0	180.555	0	0	0	0	0	15.0463	Cytoplasmic	Cytoplasm	278	Cytoplasmic	Cytoplasmic	Cytoplasmic	Cytoplasmic	Cytoplasmic	-	-	DNA metabolism	DNA replication, recombination, and repair
15801821	Q8X8Q5	NP_287839.1	Z2416	ydaO	CY	C32 tRNA thiolase [Escherichia coli O157:H7 EDL933]	1077 / 1120 / - / -	35513.6	0	0	0	0	0	0	179.499	0	0	0	0	0	14.9582	Cytoplasmic	Cytoplasm	311	Cytoplasmic	Cytoplasmic	Cytoplasmic	Cytoplasmic	Cytoplasmic	-	-	Unknown function	General
15802339	Q8XBE8	NP_288365.1	Z2987	_		putative tail fiber component of prophage CP-933T [Escherichia coli O157:H7 EDL933]	1078 / - / 1319 / 1861	75221.45*	0	0	0	0	0	179.211	0	0	0	0	0	0	14.9342	Cytoplasmic Membrane	Inner membrane	696	Unknown	X	Cytoplasmic	Cytoplasmic	Inner Membrane	-	-	Mobile and extrachromosomal element functions	Prophage functions
15803112	Q8X9F6	NP_289143.1	Z3869	yfiQ	CY	fused predicted acyl-CoA synthetase [Escherichia coli O157:H7 EDL933]	1079 / 1130 / 1243 / 784	97953.7	0	0	0	0	0	0	0	178.323	0	0	0	0	14.8603	Cytoplasmic	Cytoplasm	886	Unknown	Cytoplasmic	Cytoplasmic	Cytoplasmic	Cytoplasmic	-	-	Unknown function	Enzymes of unknown specificity
15804717	P0AEC9	NP_290758.1	Z5727	yjdH	IM	sensory histidine kinase DcuS [Escherichia coli O157:H7 EDL933]	1080 / - / 1374 / -	60548.6	0	0	176.493	0	0	0	0	0	0	0	0	0	14.7078	Cytoplasmic Membrane	Inner membrane	543	Inner Membrane	Cytoplasmic	Cytoplasmic	Cytoplasmic	Inner Membrane	-	-	Regulatory functions	Other
15801640	Q8XAW4	NP_287657.1	Z2210	ydeN	PP	putative sulfatase YdeN [Escherichia coli O157:H7 EDL933]	1081 / 255 / 241 / 965	64096.95*	0	0	0	0	0	0	0	0	0	0	176.301	0	14.6918	Unknown/Multiple Localization	Inner membrane	571	Extracellular	X	Periplasmic	Periplasmic	Cytoplasmic	-	-	Energy metabolism	Electron transport
15799860	P0AEU9	NP_285872.1	Z0190	hlpA	PP	periplasmic chaperone [Escherichia coli O157:H7 EDL933]	1082 / 663 / 123 / 464	17687.5	0	0	0	0	0	0	0	0	0	176.148	0	0	14.679	Periplasmic	Periplasm	161	Outer Membrane	Periplasmic	Periplasmic	Periplasmic	Periplasmic	-	-	Cell envelope	Other
15800263	Q8XCT9	NP_286275.1	Z0681	cysS	CY, Ho-1	cysteinyl-tRNA synthetase [Escherichia coli O157:H7 EDL933]	1083 / 283 / 388 / 687	52210	0	0	0	0	0	0	0	0	0	175.01	0	0	14.5842	Cytoplasmic	Cytoplasm	461	Cytoplasmic	Cytoplasmic	Cytoplasmic	Cytoplasmic	Cytoplasmic	-	-	Protein synthesis	tRNA aminoacylation
15804537	Q8X767	NP_290577.1	Z5495	metL	CY, Ho-2	bifunctional aspartate kinase II/homoserine dehydrogenase II [Escherichia coli O157:H7 EDL933]	1084 / - / - / 475	88914.2	174.463	0	0	0	0	0	0	0	0	0	0	0	14.5386	Cytoplasmic Membrane	Cytoplasm	810	Cytoplasmic	Cytoplasmic	Cytoplasmic	Cytoplasmic	Unknown	-	-	Amino acid biosynthesis	Aspartate family
15800755	P0AAZ6	NP_286769.1	Z1238	ycaJ	CY	recombination factor protein RarA [Escherichia coli O157:H7 EDL933]	1085 / 873 / - / 1623	49614.67*	170.175	0	0	0	0	0	0	0	0	0	0	0	14.1813	Cytoplasmic	Cytoplasm	447	Cytoplasmic	X	Cytoplasmic	Cytoplasmic	Cytoplasmic	-	-	Transcription	Degradation of RNA
157267366	Q8XCP4	NP_288911.2	Z3600	_	bb-OM	putative fimbrial usher [Escherichia coli O157:H7 EDL933]	1086 / - / - / -	96895.52*	0	0	0	0	0	0	0	0	0	168.94	0	0	14.0784	Outer Membrane	Outer membrane	879	Inner Membrane	X	Extracellular	Extracellular	Periplasmic	-	-	Protein fate	Protein folding and stabilization
15805002	Q8XA66	NP_289101.1	Z3817m	yphC_2	L (IM or OM)	Zn-dependent dehydrogenase [Escherichia coli O157:H7 EDL933]	1087 / - / - / -	39318.57*	0	163.848	0	0	0	0	0	0	0	0	0	0	13.654	Cytoplasmic	Cytoplasm	277	Cytoplasmic	X	Cytoplasmic	Cytoplasmic	Cytoplasmic	-	-	No Data	No Data
15802746	Q8XE66	NP_288773.1	Z3450	narP	CY	transcriptional regulator NarP [Escherichia coli O157:H7 EDL933]	1088 / - / 345 / 472	23615.1	0	0	0	0	0	0	0	0	0	160.927	0	0	13.4106	Cytoplasmic	Cytoplasm	215	Cytoplasmic	Cytoplasmic	Cytoplasmic	Cytoplasmic	Cytoplasmic	-	-	Energy metabolism	Anaerobic
15802264	P0ADF7	NP_288288.1	Z2903	edd	CY	phosphogluconate dehydratase [Escherichia coli O157:H7 EDL933]	1089 / - / - / 1566	64658.21*	0	0	0	0	0	0	0	0	0	0	0	160.409	13.3674	Cytoplasmic	Cytoplasm	603	Unknown	X	Cytoplasmic	Cytoplasmic	Cytoplasmic	-	-	Energy metabolism	Entner-Doudoroff
15803713	Q8X9M0	NP_289747.1	Z4534	argG	CY	argininosuccinate synthase [Escherichia coli O157:H7 EDL933]	1090 / 627 / 1213 / 1056	49928.6	0	0	0	0	0	0	159.551	0	0	0	0	0	13.2959	Cytoplasmic	Cytoplasm	447	Cytoplasmic	Cytoplasmic	Cytoplasmic	Cytoplasmic	Cytoplasmic	-	-	Amino acid biosynthesis	Glutamate family
15802887	Q8XCP2	NP_288914.1	Z3604	fadJ	CY, Ht-Mu	multifunctional fatty acid oxidation complex subunit alpha [Escherichia coli O157:H7 EDL933]	1091 / - / - / 593	76980.2	0	0	0	0	0	159.041	0	0	0	0	0	0	13.2534	Cytoplasmic	Cytoplasm	714	Cytoplasmic	Cytoplasmic	Cytoplasmic	Cytoplasmic	Unknown	-	-	Energy metabolism	Electron transport
15800109	Q8XEB6	NP_286121.1	Z0479	phoA	PP	alkaline phosphatase [Escherichia coli O157:H7 EDL933]	1092 / 992 / - / 1581	52121.6	0	0	0	0	0	0	0	0	0	0	156.689	0	13.0574	Periplasmic	Cytoplasm	494	periplasm	Periplasmic	Cytoplasmic	Periplasmic	Periplasmic	-	-	Central intermediary metabolism	Phosphorus compounds
15800467	Q8X943	NP_286479.1	Z0928	galT	CY, Ho-2	galactose-1-phosphate uridylyltransferase [Escherichia coli O157:H7 EDL933]	1093 / 515 / 843 / 1168	39652.1	0	0	0	0	0	0	0	0	0	156.257	0	0	13.0214	Unknown	Cytoplasm	348	Cytoplasmic	Cytoplasmic	Cytoplasmic	Periplasmic	Cytoplasmic	-	-	Energy metabolism	Sugars
15803448	P0A9T2	NP_289481.1	Z4251	serA	CY, Ho-4	D-3-phosphoglycerate dehydrogenase [Escherichia coli O157:H7 EDL933]	1094 / 456 / 977 / 76	44174.1	0	0	0	0	0	0	155.143	0	0	0	0	0	12.9286	Cytoplasmic	Cytoplasm	410	Cytoplasmic	Cytoplasmic	Cytoplasmic	Cytoplasmic	Cytoplasmic	-	-	Amino acid biosynthesis	Serine family
15799870	Q8X8W8	NP_285882.1	Z0200	tilS	CY	tRNA(Ile)-lysidine synthetase [Escherichia coli O157:H7 EDL933]	1095 / 703 / 995 / -	47876.9	0	0	0	155.121	0	0	0	0	0	0	0	0	12.9267	Unknown	Cytoplasm	431	Cytoplasmic	Cytoplasmic	Cytoplasmic	Cytoplasmic	Cytoplasmic	-	-	Cellular processes	Cell division
15803552	Q8XBT9	NP_289585.1	Z4361	metC	CY	cystathionine beta-lyase [Escherichia coli O157:H7 EDL933]	1096 / 1054 / - / -	43247.49*	0	0	0	0	0	0	152.085	0	0	0	0	0	12.6737	Cytoplasmic	Cytoplasm	395	Cytoplasmic	X	Cytoplasmic	Cytoplasmic	Cytoplasmic	-	-	Amino acid biosynthesis	Aspartate family
15800282	Q8XBY5	NP_286294.1	Z0707	_		putative Rhs element Vgr protein [Escherichia coli O157:H7 EDL933]	1097 / - / - / -	71449.4	0	0	0	0	0	0	0	0	0	0	0	152.009	12.6674	Unknown	Cytoplasm	633	Unknown	Cytoplasmic	Extracellular	Cytoplasmic	Cytoplasmic	-	-	Energy metabolism	Photosynthesis
15805003	Q8XAU8	NP_287666.1	Z2221m	_	IM	oxygen sensing protein [Escherichia coli O157:H7 EDL933]	1098 / - / - / -	90751.24*	0	0	0	0	0	0	150.857	0	0	0	0	0	12.5714	Cytoplasmic Membrane	Cytoplasm	367	Inner Membrane	X	Cytoplasmic	Cytoplasmic	Cytoplasmic	-	-	No Data	No Data
15802355	Q8XBC5	NP_288381.1	Z3010	fliY	PP	cystine transporter subunit [Escherichia coli O157:H7 EDL933]	1099 / - / 1350 / -	29052.1	148.113	0	0	0	0	0	0	0	0	0	0	0	12.3428	Periplasmic	Periplasm	266	periplasm	Periplasmic	Periplasmic	Periplasmic	Periplasmic	-	-	Transport and binding proteins	Amino acids, peptides and amines
15802024	P58384	NP_288045.1	Z2611	tus	CY	DNA replication terminus site-binding protein [Escherichia coli O157:H7 EDL933]	1100 / - / 1431 / 708	35754.8	0	0	0	0	0	0	0	0	0	0	0	147.086	12.2571	Cytoplasmic	Cytoplasm	309	Cytoplasmic	Cytoplasmic	Cytoplasmic	Cytoplasmic	Cytoplasmic	-	-	DNA metabolism	DNA replication, recombination, and repair
15804113	Q8XDM1	NP_290152.1	Z4992	xylG	IM	xylose transporter ATP-binding subunit [Escherichia coli O157:H7 EDL933]	1101 / - / - / 1758	56438.5	0	0	0	0	147.066	0	0	0	0	0	0	0	12.2555	Cytoplasmic Membrane	Inner membrane	513	Inner Membrane	Cytoplasmic	Cytoplasmic	Cytoplasmic	Cytoplasmic	-	-	Transport and binding proteins	Carbohydrates, organic alcohols, and acids
15802542	P0A931	NP_288568.1	Z3227	wza	L-OM, Ho-8	putative polysaccharide export protein [Escherichia coli O157:H7 EDL933]	1102 / - / - / -	41908.3	0	0	0	145.365	0	0	0	0	0	0	0	0	12.1138	Outer Membrane	Outer membrane	379	Inner Membrane	Periplasmic	Periplasmic	Periplasmic	Outer Membrane	-	-	Cell envelope	Biosynthesis and degradation of surface polysaccharides and lipopolysaccharides
15801692	Q8X9X1	NP_287710.1	Z2268	yncD	bb-OM	putative outer membrane receptor for iron transport [Escherichia coli O157:H7 EDL933]	1103 / - / - / -	77371.16*	0	141.884	0	0	0	0	0	0	0	0	0	0	11.8237	Outer Membrane	Outer membrane	700	Outer Membrane	X	Extracellular	Extracellular	Outer Membrane	-	-	Cellular processes	Other
75994475	Q9ZGU3	YP_325589.1	L7029	_	IM	lipid A biosynthesis (KDO)2-(lauroyl)-lipid IVA acyltransferase [Escherichia coli O157:H7 EDL933]	1104 / - / - / 1107	39073.1	0	0	0	0	0	0	140.506	0	0	0	0	0	11.7088	Cytoplasmic Membrane	Inner membrane	343	Inner Membrane	Inner Membrane	Cytoplasmic	Cytoplasmic	Cytoplasmic	Inner Membrane	-	No Data	No Data
15800382	Q8X9H8	NP_286394.1	Z0827	glnS	CY, Ho-1	glutaminyl-tRNA synthetase [Escherichia coli O157:H7 EDL933]	1105 / 339 / 760 / 451	63507.4	0	0	0	0	0	0	0	0	0	137.329	0	0	11.4441	Cytoplasmic	Cytoplasm	554	Cytoplasmic	Cytoplasmic	Cytoplasmic	Cytoplasmic	Cytoplasmic	-	-	Protein synthesis	tRNA aminoacylation
15803338	Q8X6N0	NP_289371.1	Z4136	recD	CY, Ht-3	exonuclease V subunit alpha [Escherichia coli O157:H7 EDL933]	1106 / - / 1469 / 1200	66839.41*	0	0	0	136.116	0	0	0	0	0	0	0	0	11.343	Cytoplasmic	Cytoplasm	608	Cytoplasmic	X	Cytoplasmic	Cytoplasmic	Cytoplasmic	-	-	DNA metabolism	DNA replication, recombination, and repair
15799995	Q8X4N4	NP_286007.1	Z0357	yagW	Ex/OM	putative receptor [Escherichia coli O157:H7 EDL933]	1107 / - / - / -	60004.5	0	0	0	0	0	0	129.998	0	0	0	0	0	10.8332	Extracellular	Outer membrane	547	Unknown	Extracellular	Extracellular	Extracellular	Extracellular	-	-	Energy metabolism	Electron transport
15804881	Q8XC70	NP_290922.1	Z5902	_		putative helicase [Escherichia coli O157:H7 EDL933]	1108 / - / - / 312	79440.41*	0	0	0	0	0	0	0	0	0	0	0	129.836	10.8197	Cytoplasmic	Cytoplasm	704	Cytoplasmic	X	Cytoplasmic	Cytoplasmic	Cytoplasmic	-	-	Energy metabolism	Electron transport
15800831	Q8XEJ0	NP_286847.1	Z1324	_		putative exodeoxyribonuclease VIII for cryptic prophage CP-933M [Escherichia coli O157:H7 EDL933]	1109 / 1156 / - / 1823	92407.25*	77.6047	0	0	0	0	0	52.1089	0	0	0	0	0	10.8095	Cytoplasmic	Cytoplasm	823	Extracellular	X	Cytoplasmic	Cytoplasmic	Unknown	-	-	Hypothetical proteins	Conserved
15800888	Q8X4C8	NP_286904.1	Z1382	_		putative tail component encoded by cryptic prophage CP-933M; partial [Escherichia coli O157:H7 EDL933]	1110 / - / 1377 / -	37500.31*	0	0	0	0	0	0	129.501	0	0	0	0	0	10.7917	Unknown	Cytoplasm	375	periplasm	X	Cytoplasmic	Extracellular	Extracellular	-	-	Mobile and extrachromosomal element functions	Prophage functions
15800683	Q8XEF1	NP_286697.1	Z1162	_		unknown in ISEc8 [Escherichia coli O157:H7 EDL933]	1111 / - / - / 1787	31821.6	0	0	0	0	0	0	0	128.545	0	0	0	0	10.7121	Cytoplasmic	Cytoplasm	285	Unknown	Cytoplasmic	Cytoplasmic	Cytoplasmic	Cytoplasmic	-	-	Mobile and extrachromosomal element functions	Transposon functions
15803053	P0A6Z2	NP_289083.1	Z3793	hscA	CY, Ht-Mu	chaperone protein HscA [Escherichia coli O157:H7 EDL933]	1112 / 203 / 1100 / 484	65612.35*	127.969	0	0	0	0	0	0	0	0	0	0	0	10.6641	Cytoplasmic	Cytoplasm	616	Cytoplasmic	X	Cytoplasmic	Cytoplasmic	Unknown	-	-	Protein fate	Protein folding and stabilization
15801277	Q8XAH4	NP_287294.1	Z1806	_		putative portal protein Z1806 [Escherichia coli O157:H7 EDL933]	1113 / - / - / -	95042.2	0	0	0	0	0	0	0	0	0	0	127.185	0	10.5988	Cytoplasmic	Cytoplasm	859	Unknown	Cytoplasmic	Cytoplasmic	Periplasmic	Cytoplasmic	-	-	Mobile and extrachromosomal element functions	Prophage functions
15799764	P0ACP3	NP_285776.1	Z0090	fruR	CY, Ho-4	DNA-binding transcriptional regulator FruR [Escherichia coli O157:H7 EDL933]	1114 / - / - / 148	37997.8	0	0	0	0	0	126.172	0	0	0	0	0	0	10.5143	Cytoplasmic	Cytoplasm	334	Cytoplasmic	Cytoplasmic	Cytoplasmic	Cytoplasmic	Cytoplasmic	-	-	Regulatory functions	DNA interactions
75994518	O82894	YP_325632.1	L7072	_		putative reverse transcriptase L7072 [Escherichia coli O157:H7 EDL933]	1115 / - / - / -	65512.8	0	0	0	0	0	0	0	0	0	0	0	125.224	10.4353	Cytoplasmic	Cytoplasm	574	Cytoplasmic/Periplasmic	Unknown	Cytoplasmic	Cytoplasmic	Cytoplasmic	Cytoplasmic	-	No Data	No Data
15803452	Q8XEI6	NP_289485.1	Z4255	ygfD	IM	arginine/ornithine transport system ATPase [Escherichia coli O157:H7 EDL933]	1116 / - / 1393 / -	36683.5	0	0	0	0	0	0	0	125.149	0	0	0	0	10.4291	Cytoplasmic Membrane	Cytoplasm	331	Inner Membrane	Cytoplasmic	Cytoplasmic	Cytoplasmic	Cytoplasmic	-	-	Transport and binding proteins	Amino acids, peptides and amines
15802992	Q8XEH2	NP_289022.1	Z3727	acrD	IM	aminoglycoside/multidrug efflux system [Escherichia coli O157:H7 EDL933]	1117 / - / - / -	113015	0	0	0	124.924	0	0	0	0	0	0	0	0	10.4103	Cytoplasmic Membrane	Inner membrane	1037	Inner Membrane	Cytoplasmic	Cytoplasmic	Cytoplasmic	Inner Membrane	-	-	Transport and binding proteins	Other
15802769	Q8XE40	NP_288796.1	Z3475	rcsD (yojN)	IM	phosphotransfer intermediate protein in two-component regulatory system with RcsBC [Escherichia coli O157:H7 EDL933]	1118 / - / 1264 / 788	100357	0	0	0	0	123.841	0	0	0	0	0	0	0	10.3201	Cytoplasmic Membrane	Cytoplasm	890	Inner Membrane	Cytoplasmic	Cytoplasmic	Cytoplasmic	Inner Membrane	-	-	Unknown function	Enzymes of unknown specificity
15801747	Q8X9R3	NP_287765.1	Z2328	ydbH	IM	hypothetical protein Z2328 [Escherichia coli O157:H7 EDL933]	1119 / - / - / -	96846.97*	0	122.757	0	0	0	0	0	0	0	0	0	0	10.2298	Cytoplasmic Membrane	Inner membrane	879	Unknown	X	Periplasmic	Periplasmic	Unknown	-	-	Hypothetical proteins	Conserved
15800511	Q8X851	NP_286523.1	Z0975	_		putative tail component of prophage CP-933K [Escherichia coli O157:H7 EDL933]	1120 / 1000 / - / -	112259.01*	0	0	0	0	0	0	0	0	0	74.4457	0	47.057	10.1252	Unknown/Multiple Localization	Flagellar	1021	Unknown	X	Cytoplasmic	Periplasmic	Cytoplasmic	-	-	Mobile and extrachromosomal element functions	Prophage functions
161367535	Q8XD74	NP_289449.2	Z4218	_		putative chlorohydrolase/aminohydrolase [Escherichia coli O157:H7 EDL933]	1121 / - / 1279 / -	48794.4	0	0	0	0	0	0	0	0	0	0	0	118.677	9.88972	Cytoplasmic	Extracellular	464	Unknown	Cytoplasmic	Cytoplasmic	Cytoplasmic	Cytoplasmic	-	-	Unclassified	Role category not yet assigned
161367571	Q8XE80	NP_288760.2	Z3436	yejA	PP	periplasmic binding component of the YejA/YejB/YejE/YejF ABC transporter [Escherichia coli O157:H7 EDL933]	1122 / - / 1124 / 1688	69731.06*	0	0	0	0	0	0	0	0	118.146	0	0	0	9.8455	Unknown/Multiple Localization	Periplasm	606	Extracellular	X	Cytoplasmic	Periplasmic	Periplasmic	-	-	Transport and binding proteins	Unknown substrate
161367595	Q8XCJ2	NP_288293.2	Z2908	yebA	IM	predicted peptidase YebA [Escherichia coli O157:H7 EDL933]	1123 / - / - / -	49117.63*	0	0	0	0	0	0	0	116.693	0	0	0	0	9.7244	Unknown	Extracellular	419	Extracellular	X	Cytoplasmic	Cytoplasmic	Unknown	-	-	Protein fate	Degradation of proteins, peptides, and glycopeptides
15804357	Q8XAV5	NP_290397.1	Z5277	yifB		putative ATP-dependent protease [Escherichia coli O157:H7 EDL933]	1124 / - / - / -	56283.6	0	0	0	116.255	0	0	0	0	0	0	0	0	9.68788	Cytoplasmic	Cytoplasm	516	Cytoplasmic	Cytoplasmic	Cytoplasmic	Cytoplasmic	Unknown	-	-	Unknown function	General
15800298	Q8XBW7	NP_286310.1	Z0724	fepA	bb-OM	outer membrane receptor FepA [Escherichia coli O157:H7 EDL933]	1125 / - / - / 1611	82089.5	0	0	0	0	0	0	0	0	0	114.018	0	0	9.50152	Outer Membrane	Outer membrane	746	Outer Membrane	Extracellular	Extracellular	Periplasmic	Outer Membrane	-	-	Transport and binding proteins	Cations and iron carrying compounds
15799726	Q7AHT0	NP_285738.1	Z0049	fixC		putative oxidoreductase FixC [Escherichia coli O157:H7 EDL933]	1126 / - / - / -	45719.79*	0	112.323	0	0	0	0	0	0	0	0	0	0	9.36029	Cytoplasmic	Periplasm	428	Unknown	X	Cytoplasmic	Cytoplasmic	Cytoplasmic	-	-	Energy metabolism	Electron transport
15799948	Q8X7N4	NP_285960.1	Z0304	proA	CY, Ho-4	gamma-glutamyl phosphate reductase [Escherichia coli O157:H7 EDL933]	1127 / 214 / 397 / 1280	44722.4	0	0	0	0	0	0	110.127	0	0	0	0	0	9.17729	Cytoplasmic	Cytoplasm	417	Cytoplasmic	Cytoplasmic	Cytoplasmic	Cytoplasmic	Cytoplasmic	-	-	Amino acid biosynthesis	Glutamate family
15802566	P0A9S4	NP_288593.1	Z3254	gatD	CY	galactitol-1-phosphate dehydrogenase [Escherichia coli O157:H7 EDL933]	1128 / - / 1219 / -	37388.7	0	0	0	0	0	0	0	0	0	107.789	0	0	8.98242	Cytoplasmic	Cytoplasm	346	Cytoplasmic	Cytoplasmic	Cytoplasmic	Cytoplasmic	Unknown	-	-	Energy metabolism	Sugars
15802959	Q8XBJ2	NP_288989.1	Z3693	murQ	CY	N-acetylmuramic acid-6-phosphate etherase [Escherichia coli O157:H7 EDL933]	1129 / - / 1354 / 387	31158.43*	0	0	0	0	0	0	0	0	0	103.204	0	0	8.60031	Cytoplasmic	Cytoplasm	298	Cytoplasmic	X	Cytoplasmic	Cytoplasmic	Cytoplasmic	-	-	Unknown function	General
15799849	Q8X8Y6	NP_285861.1	Z0177	glnD	CY, Ho-1	PII uridylyl-transferase [Escherichia coli O157:H7 EDL933]	1130 / - / 981 / 1066	102419	0	0	0	0	0	57.6443	0	38.917	0	0	0	0	8.04677	Cytoplasmic Membrane	Cytoplasm	890	Cytoplasmic	Cytoplasmic	Cytoplasmic	Cytoplasmic	Cytoplasmic	-	-	Central intermediary metabolism	Nitrogen metabolism
15800972	A7UQW7	NP_286988.1	Z1478	_		hypothetical protein Z1478 [Escherichia coli O157:H7 EDL933]	1131 / - / 1394 / 1783	36707.8	0	0	0	0	0	0	0	0	0	95.3663	0	0	7.94719	Cytoplasmic	Cytoplasm	335	Unknown	Cytoplasmic	Cytoplasmic	Cytoplasmic	Cytoplasmic	-	-	Hypothetical proteins	Conserved
161367631	Q8X893	NP_286492.2	Z0942	ybhJ		predicted hydratase YbhJ [Escherichia coli O157:H7 EDL933]	1132 / - / - / -	81356.2	0	0	0	0	0	0	93.9771	0	0	0	0	0	7.83142	Cytoplasmic	Cytoplasm	761	periplasm	Cytoplasmic	Cytoplasmic	Cytoplasmic	Unknown	-	-	Energy metabolism	Electron transport
15800364	Q8XBL9	NP_286376.1	Z0800	ybeW		putative dnaK protein [Escherichia coli O157:H7 EDL933]	1133 / - / - / -	61925.54*	0	0	0	0	0	91.904	0	0	0	0	0	0	7.65867	Cytoplasmic	Cytoplasm	556	Cytoplasmic	X	Cytoplasmic	Cytoplasmic	Cytoplasmic	-	-	Energy metabolism	Electron transport
15803033	Q8XAB0	NP_289063.1	Z3773	xseA		exodeoxyribonuclease VII large subunit [Escherichia coli O157:H7 EDL933]	1134 / 1105 / - / -	51703.62*	0	90.817	0	0	0	0	0	0	0	0	0	0	7.56808	Cytoplasmic	Cytoplasm	456	Cytoplasmic	X	Periplasmic	Cytoplasmic	Cytoplasmic	-	-	DNA metabolism	Degradation of DNA
161367494	Q8XD89	NP_290227.2	Z5073	ligB		NAD-dependent DNA ligase LigB [Escherichia coli O157:H7 EDL933]	1135 / - / 1451 / -	63440.26*	0	0	0	88.7129	0	0	0	0	0	0	0	0	7.39274	Unknown	Nucleoid	560	Cytoplasmic	X	Periplasmic	Periplasmic	Periplasmic	-	-	Energy metabolism	Electron transport
15802284	Q8XCH5	NP_288308.1	Z2924	yecP		predicted SAM-dependent methyltransferase [Escherichia coli O157:H7 EDL933]	1136 / 610 / 980 / -	37051.3	0	0	0	0	0	0	0	0	0	88.5574	0	0	7.37978	Cytoplasmic	Cytoplasm	323	Unknown	Cytoplasmic	Cytoplasmic	Cytoplasmic	Cytoplasmic	-	-	Unknown function	Enzymes of unknown specificity
15802463	Q8X8V6	NP_288489.1	Z3137	_		uncharacterized protein Z3137 [Escherichia coli O157:H7 EDL933]	1137 / - / - / -	39569.54*	0	0	0	0	0	0	0	0	0	87.6264	0	0	7.3022	Cytoplasmic	Cytoplasm	350	Unknown	X	Cytoplasmic	Cytoplasmic	Cytoplasmic	-	-	Hypothetical proteins	Conserved
15799768	P0AD69	NP_285780.1	Z0094	ftsI	IM, Ht-Mu, divisome	septum formation; penicillin-binding protein 3; peptidoglycan synthetase [Escherichia coli O157:H7 EDL933]	1138 / 1148 / - / -	63874.8	0	0	0	0	0	0	0	0	0	0	0	85.3363	7.11136	Cytoplasmic Membrane	Inner membrane	588	Inner Membrane	Cytoplasmic	Cytoplasmic	Cytoplasmic	Inner Membrane	-	-	Cell envelope	Biosynthesis and degradation of murein sacculus and peptidoglycan
15802370	Q8X519	NP_288396.1	Z3026	_	Ex	putative secreted protein [Escherichia coli O157:H7 EDL933]	1139 / - / - / -	43280.2	0	0	0	84.1332	0	0	0	0	0	0	0	0	7.0111	Extracellular	Cytoplasm	379	Extracellular	Cytoplasmic	Cytoplasmic	Cytoplasmic	Cytoplasmic	-	-	Energy metabolism	Electron transport
15803879	Q8XEE3	NP_289913.1	Z4726	nirB	CY, Ho-2, Ht-4	nitrite reductase (NAD(P)H) subunit [Escherichia coli O157:H7 EDL933]	1140 / 1155 / - / -	93183.42*	0	0	0	0	0	0	0	0	0	0	0	82.401	6.86675	Cytoplasmic	Cytoplasm	847	periplasm	X	Cytoplasmic	Cytoplasmic	Cytoplasmic	-	-	Energy metabolism	Anaerobic
15802330	Q8XBG0	NP_288356.1	Z2978	_		putative replication protein for prophage CP-933T [Escherichia coli O157:H7 EDL933]	1141 / 1053 / 1412 / 1690	107250.11*	0	0	0	0	0	0	0	0	0	0	78.0701	0	6.50584	Cytoplasmic	Cytoplasm	940	Unknown	X	Cytoplasmic	Cytoplasmic	Cytoplasmic	-	-	Mobile and extrachromosomal element functions	Prophage functions
15800378	P0AF22	NP_286390.1	Z0823	nagC	CY	transcriptional repressor of nag (N-acetylglucosamine) operon [Escherichia coli O157:H7 EDL933]	1142 / - / 1059 / 1081	44539.7	0	0	0	0	0	77.5806	0	0	0	0	0	0	6.46505	Cytoplasmic	Cytoplasm	406	Cytoplasmic	Cytoplasmic	Cytoplasmic	Cytoplasmic	Cytoplasmic	-	-	Regulatory functions	Other
15801890	Q8X7D6	NP_287910.1	Z2514	rnb	CY	exoribonuclease II [Escherichia coli O157:H7 EDL933]	1143 / 319 / 938 / 1119	72534.73*	74.4706	0	0	0	0	0	0	0	0	0	0	0	6.20588	Cytoplasmic	Cytoplasm	644	Cytoplasmic	X	Cytoplasmic	Cytoplasmic	Cytoplasmic	-	-	Transcription	Degradation of RNA
15801891	Q8X7D5	NP_287911.1	Z2516	yciR		RNase II stability modulator [Escherichia coli O157:H7 EDL933]	1144 / - / - / -	74704.2	0	0	0	0	0	72.2298	0	0	0	0	0	0	6.01915	Cytoplasmic Membrane	Cytoplasm	661	Inner Membrane	Cytoplasmic	Cytoplasmic	Cytoplasmic	Cytoplasmic	-	-	Unknown function	General
15801484	Q8X287	NP_287501.1	Z2037	exoO		putative exonuclease VIII, ds DNA exonuclease, 5' --_ 3' specific encoded by prophage CP-933O [Escherichia coli O157:H7 EDL933]	1145 / - / - / -	92777.1	0	0	0	70.3028	0	0	0	0	0	0	0	0	5.85857	Cytoplasmic	Cytoplasm	823	Unknown	Cytoplasmic	Cytoplasmic	Cytoplasmic	Cytoplasmic	-	-	Hypothetical proteins	Conserved
15803920	Q8X710	NP_289956.1	Z4771	malQ	CY	4-alpha-glucanotransferase [Escherichia coli O157:H7 EDL933]	1146 / - / - / -	78536.4	0	0	0	0	0	0	0	0	0	68.2885	0	0	5.69071	Cytoplasmic	Cytoplasm	694	Cytoplasmic	Cytoplasmic	Cytoplasmic	Cytoplasmic	Cytoplasmic	-	-	Energy metabolism	Biosynthesis and degradation of polysaccharides
75994541	Q9ZGR4	YP_325655.1	L7095	_	Ex	putative cytotoxin with cysteine endopeptidase activity [Escherichia coli O157:H7 EDL933]	1147 / 1184 / - / 1870	361964	0	0	0	0	0	0	0	0	0	0	68.0206	0	5.66838	Unknown/Multiple Localization	Extracellular	3169	Outer Membrane	Extracellular	Cytoplasmic	Cytoplasmic	Cytoplasmic	Outer Membrane	-	No Data	No Data
[truncated: 6 more rows]

## Sheet: B - F2-s(SEC)
Table S4. Shotgun proteomics analysis of STEC strain 86-24 using the modified spectral counting method APEX comparing protein profiles in four lysate fractions.
[truncated: 1,189 more rows]

[truncated: 3 more sheets: C - F3-s(SEC), D - F4-p , Legends - A, B, C, D worksheets]
